# Supplementary material for: Pd-catalyzed divergent regioselective annulation of phosphinyl allenes accessing polyarylfurans and 2H-chromenes
Source: Royal Society of Chemistry journal article supplement (doi:10.1039/d3cc05974j), 2024-01-01
Supplement: d3cc05974j1.pdf [file d3cc05974j1.pdf]

## **Supporting Information for:**

# **Pd-Catalyzed Divergent Regioselective Annulation of Phosphinyl Allenes Accessing Polyarylfurans and 2H- Chromenes**

Yang Li,<sup>a,b</sup> Xiao-Long Yan,<sup>a</sup> Li-Yan Hu,<sup>a</sup> Kai Luo,<sup>a</sup> Jie Zhu<sup>\*,a</sup> and Lei Wu<sup>\*,a</sup>

<sup>a</sup>*Jiangsu Key Laboratory of Pesticide Science and Department of Chemistry, College of Sciences, Nanjing Agricultural University, Nanjing 210095, P. R. China. E-mail: [rickywu@njau.edu.cn](mailto:rickywu@njau.edu.cn).*

<sup>b</sup>*School of Bioengineering, Huainan Normal University, Huainan 232038, P. R. China*

## *Table of Contents*

|                                                                                                                            |    |
|----------------------------------------------------------------------------------------------------------------------------|----|
| 1. General Information.....                                                                                                | 4  |
| 2. General Procedures for Substrates Preparation.....                                                                      | 4  |
| 3. General Procedure for the Synthesis of Polyarylfuran <b>3a</b> .....                                                    | 5  |
| 4. General Procedure for the Synthesis of 2 <i>H</i> -Chromene <b>6a</b> .....                                             | 6  |
| 5. Optimization of the Reaction Conditions .....                                                                           | 6  |
| 6. Gram-Scale Synthesis of <b>3a</b> .....                                                                                 | 7  |
| 7. The Key NOE Correlations of Compound <b>6i</b> and <b>6j</b> .....                                                      | 8  |
| 8. Single Crystal X-Ray Diffraction .....                                                                                  | 9  |
| 9. Derivatization of Product <b>5a</b> .....                                                                               | 24 |
| 10. Mechanistic Studies.....                                                                                               | 24 |
| 11. Characterizations of Products.....                                                                                     | 24 |
| 12. <sup>1</sup> H-NMR, <sup>13</sup> C-NMR, <sup>31</sup> P-NMR, <sup>19</sup> F-NMR, and HRMS Spectra for Products ..... | 50 |



## 1. General Information

Solvents and reagents were reagent grade and used without purification unless otherwise noted. Anhydrous dichloromethane and methanol were bought from Aladdin Chemicals, Shanghai, China. Column chromatography was performed using silica gel (200-300 mesh). The  $^1\text{H-NMR}$ ,  $^{13}\text{C-NMR}$ ,  $^{19}\text{F-NMR}$ ,  $^{31}\text{P-NMR}$  data reported in ppm ( $\delta$ ) were recorded on a 400, 500 or 600 MHz NMR Bruker-DMX with tetramethylsilane (TMS) as an internal standard and  $\text{CDCl}_3$  as solvent unless otherwise stated. Coupling constants are reported in Hertz (Hz). Spectral splitting patterns are designated as s, singlet; d, doublet; t, triplet; q, quartet; p, pentet; m, multiplet; and br, broad. High resolution mass spectroscopic data of the products were collected on a Waters Micromass GCT instrument using EI (70 eV) or an Agilent Technologies 6540 UHD Accurate-Mass Q-TOF LC/MS using ESI.

## 2. General Procedures for Substrates Preparation

All allenylphosphine oxide substrates (**1**) were prepared according to the procedure reported in our previous works, please see more details in: Y.-T. Xia, J.-J. Wu, C.-Y. Zhang, M. Mao, Y.-G. Ji, L. Wu, *Org. Lett.* **2019**, *21*, 6383; K. Wei, K. Luo, F. Liu, L. Wu, L.-Z. Wu, *Org. Lett.* **2019**, *21*, 1994; J. Zhu, M. Mao, H.-J. Ji, J.-Y. Xu, L. Wu, *Org. Lett.* **2017**, *19*, 1946; L. Zhang, J. Zhu, J. Ma, L. Wu, W.-H. Zhang, *Org. Lett.* **2017**, *19*, 6308; Y. Li, S.-Y. Zhang, X.-L. Yan, J. Zhu, K. Luo, L. Wu, *Org. Lett.* **2023**, *25*, 4720.

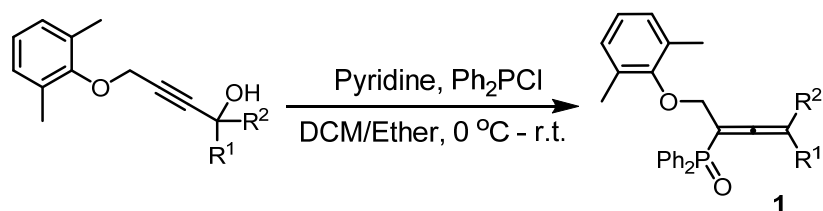

To a stirred solution of acetylenic alcohol (20 mmol) at  $0\text{ }^\circ\text{C}$  in anhydrous ether (25 mL) and pyridine (24 mmol, 1.9 mL) under nitrogen atmosphere, diphenylphosphine chloride (20 mmol) in  $\text{CH}_2\text{Cl}_2$  (25 mL) was added dropwise. The mixture was stirred at  $0\text{ }^\circ\text{C}$  for 1 h. Then, the mixture was stirred at room temperature overnight. After completion of the reaction monitored by TLC, cold water was added

and extracted with DCM twice. The organic layer was combined, dried over Na<sub>2</sub>SO<sub>4</sub>, and the solvent was removed under reduced pressure. The residue was purified by silica gel column chromatography using petroleum ether/ethyl acetate as eluent to give allenylphosphine oxide.

Using (EtO)<sub>2</sub>P(=O)Cl instead of Ph<sub>2</sub>P(=O)Cl, under the same reaction conditions, diethoxy-substituted phosphinyl allene (**1ab**) have been obtained

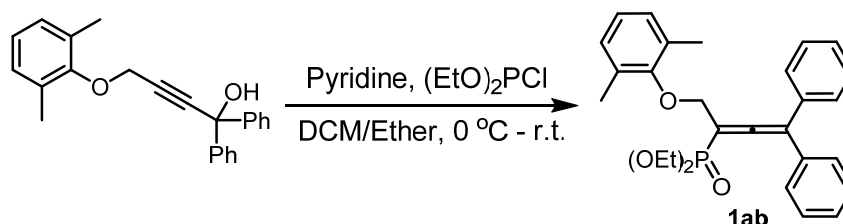

**1ab**: A colorless oil, <sup>1</sup>H NMR (500 MHz, CDCl<sub>3</sub>) δ 7.47–7.46 (m, 4H), 7.40–7.37 (m, 4H), 7.35–7.32 (m, 2H), 7.00 (d, *J* = 5.0 Hz, 2H), 6.94–6.91 (m, 1H), 4.61 (d, *J* = 10.0 Hz, 2H), 4.19–4.11 (m, 4H), 2.29 (s, 6H), 1.29 (t, *J* = 5.0 Hz, 6H). <sup>13</sup>C NMR (101 MHz, CDCl<sub>3</sub>) δ 212.00 (d, *J* = 2.5 Hz), 155.61, 134.75 (d, *J* = 7.2 Hz), 131.26, 128.99, 128.87 (d, *J* = 2.8 Hz), 128.77, 128.30, 124.35, 113.27 (d, *J* = 15.8 Hz), 95.47 (d, *J* = 189.8 Hz), 69.01 (d, *J* = 11.6 Hz), 62.81 (d, *J* = 6.0 Hz), 16.47. <sup>31</sup>P NMR (162 MHz, CDCl<sub>3</sub>) δ 15.37.

### 3. General Procedure for the Synthesis of Polyarylfuran **3a**

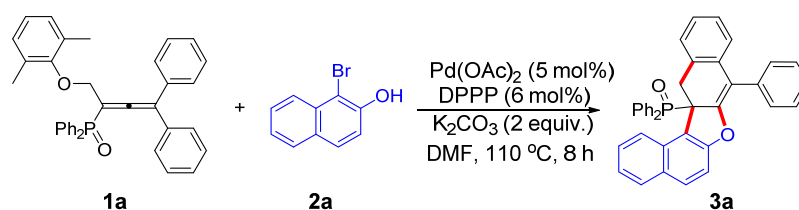

A typical experimental procedure for the synthesis of **3a** in 0.2 mmol scale: Allenylphosphine oxide **1a** (105.2 mg, 0.2 mmol, 1 equiv.), 1-bromo-2-naphthol **2a** (53.5 mg, 0.24 mmol, 1.2 equiv.), palladium acetate (2.3 mg, 0.01 mmol, 5 mol%), 1,3-bis(diphenylphosphino)propane DPPP (4.9 mg, 0.012 mmol, 6 mol%), potassium carbonate (55.3 mg, 0.4 mmol, 2.0 equiv.) were added into a 25 mL Schlenk tube. The vessel was evacuated and backfilled with N<sub>2</sub> three times, DMF (2 mL) was added via a syringe. Then, the mixture was stirred at 110 °C for 8 h in the oil bath. Upon completion of the reaction, water (30.0 mL) was added and extracted with EtOAc twice. Combined

organic layer was dried over anhydrous  $\text{Na}_2\text{SO}_4$ , and the solvent was removed under reduced pressure to afford the crude product, which was further purified by silica gel column chromatography (ethyl acetate/petroleum ether = 1/3) to afford the desired product **3a** (79.7 mg, 73%).

#### 4. General Procedure for the Synthesis of 2*H*-Chromene **6a**

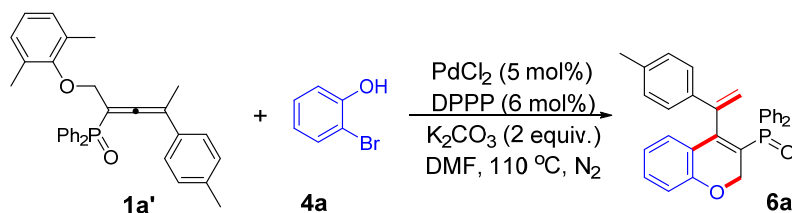

A typical experimental procedure for the synthesis of **6a** in 0.2 mmol scale: Allenylphosphine oxide **1a'** (95.6 mg, 0.2 mmol, 1 equiv.), 2-bromophenol **4a** (41.5 mg, 0.24 mmol, 1.2 equiv.), palladium chloride (1.8 mg, 0.01 mmol, 5 mol%), 1,3-bis(diphenylphosphino)propane DPPP (4.9 mg, 0.012 mmol, 6 mol%), potassium carbonate (55.3 mg, 0.4 mmol, 2.0 equiv.) were added into a 25 mL Schlenk tube. The vessel was evacuated and backfilled with  $\text{N}_2$  three times, DMF (2 mL) was added via a syringe. Then, the mixture was stirred at 110 °C for 8 h in the oil bath. Upon completion of the reaction, water (30.0 mL) was added and extracted with EtOAc twice. Combined organic layer was dried over anhydrous  $\text{Na}_2\text{SO}_4$ , and the solvent was removed under reduced pressure to afford the crude product, which was further purified by silica gel column chromatography (ethyl acetate/petroleum ether = 1/1) to afford the desired product **6a** (89.6 mg, 91%).

#### 5. Optimization of the Reaction Conditions <sup>a</sup>

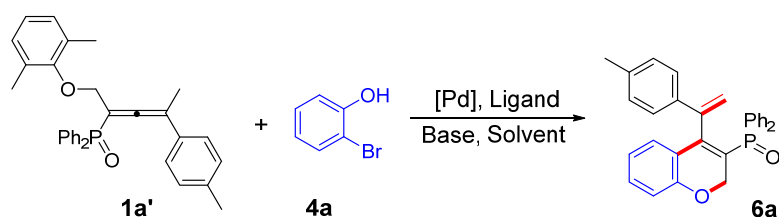

| Entry | Pd(Cat.)                                           | Ligand | Base                            | Solvent | Yield (%) <sup>b</sup> |
|-------|----------------------------------------------------|--------|---------------------------------|---------|------------------------|
| 1     | Pd(OAc) <sub>2</sub>                               | DPPP   | K <sub>2</sub> CO <sub>3</sub>  | DMF     | 63                     |
| 2     | Pd(PPh <sub>3</sub> ) <sub>2</sub> Cl <sub>2</sub> | ---    | K <sub>2</sub> CO <sub>3</sub>  | DMF     | 50                     |
| 3     | Pd <sub>2</sub> (dba) <sub>3</sub>                 | ---    | K <sub>2</sub> CO <sub>3</sub>  | DMF     | n.d.                   |
| 4     | Pd(acac) <sub>2</sub>                              | ---    | K <sub>2</sub> CO <sub>3</sub>  | DMF     | 42                     |
| 5     | Pd(TFA) <sub>2</sub>                               | DPPP   | K <sub>2</sub> CO <sub>3</sub>  | DMF     | n.d.                   |
| 6     | PdCl <sub>2</sub>                                  | DPPP   | K <sub>2</sub> CO <sub>3</sub>  | DMF     | 91                     |
| 7     | PdCl <sub>2</sub>                                  | DPPP   | K <sub>3</sub> PO <sub>4</sub>  | DMF     | trace                  |
| 8     | PdCl <sub>2</sub>                                  | DPPP   | Na <sub>2</sub> CO <sub>3</sub> | DMF     | 44                     |
| 9     | PdCl <sub>2</sub>                                  | DPPP   | NaHCO <sub>3</sub>              | DMF     | 72                     |
| 10    | PdCl <sub>2</sub>                                  | DPPP   | DIPEA                           | DMF     | trace                  |
| 11    | PdCl <sub>2</sub>                                  | DPPP   | DIPA                            | DMF     | trace                  |
| 12    | PdCl <sub>2</sub>                                  | DPPP   | K <sub>2</sub> CO <sub>3</sub>  | Toluene | n.d.                   |
| 13    | PdCl <sub>2</sub>                                  | DPPP   | K <sub>2</sub> CO <sub>3</sub>  | THF     | n.d.                   |
| 14    | PdCl <sub>2</sub>                                  | DPPP   | K <sub>2</sub> CO <sub>3</sub>  | MeCN    | n.d.                   |
| 15    | PdCl <sub>2</sub>                                  | DPPP   | K <sub>2</sub> CO <sub>3</sub>  | DCE     | n.d.                   |
| 16    | PdCl <sub>2</sub>                                  | DPPP   | K <sub>2</sub> CO <sub>3</sub>  | DMAc    | 78                     |

<sup>a</sup>Reaction conditions: **1a'** (0.2 mmol), **4a** (0.24 mmol), Base (0.4 mmol), Catalyst (5 mol%), Ligand (6 mol%), 110 °C, N<sub>2</sub>, 8 h. <sup>b</sup>Isolated yield by column chromatography. n.d.= no detect.

## 6. Gram-Scale Synthesis of **3a**

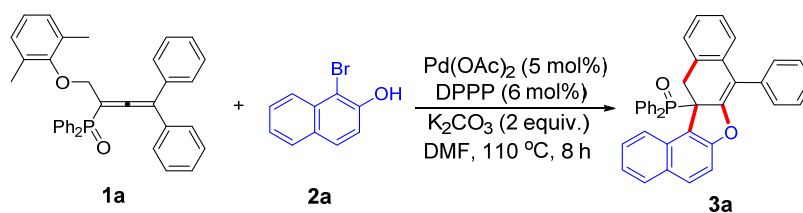

Allenylphosphine oxide **1a** (526.2 mg, 1.0 mmol, 1.0 equiv.), 1-bromo-2-naphthol

**2a** (223.1 mg, 1.2 mmol, 1.2 equiv.), palladium acetate (11.3 mg, 0.05 mmol, 5 mol%), 1,3-bis(diphenylphosphino)propane DPPP (24.7 mg, 0.06 mmol, 6 mol%), potassium carbonate (276.4 mg, 2.0 mmol, 2.0 equiv.) were added into a 25 mL Schlenk tube. The vessel was evacuated and backfilled with N<sub>2</sub> three times, DMF (10 mL) was added via a syringe.. Then, the mixture was stirred at 110 °C for 8 h in the oil bath. Upon completion of the reaction, water (100 mL) was added and extracted with EtOAc twice. Combined organic layer was dried over anhydrous Na<sub>2</sub>SO<sub>4</sub>, and the solvent was removed under reduced pressure to afford the crude product, which was further purified by silica gel column chromatography (ethyl acetate/petroleum ether = 1/3) to afford the desired product **3a** (371.4 mg, 68%).

## 7. The Key NOE Correlations of Compound **6i** and **6j**

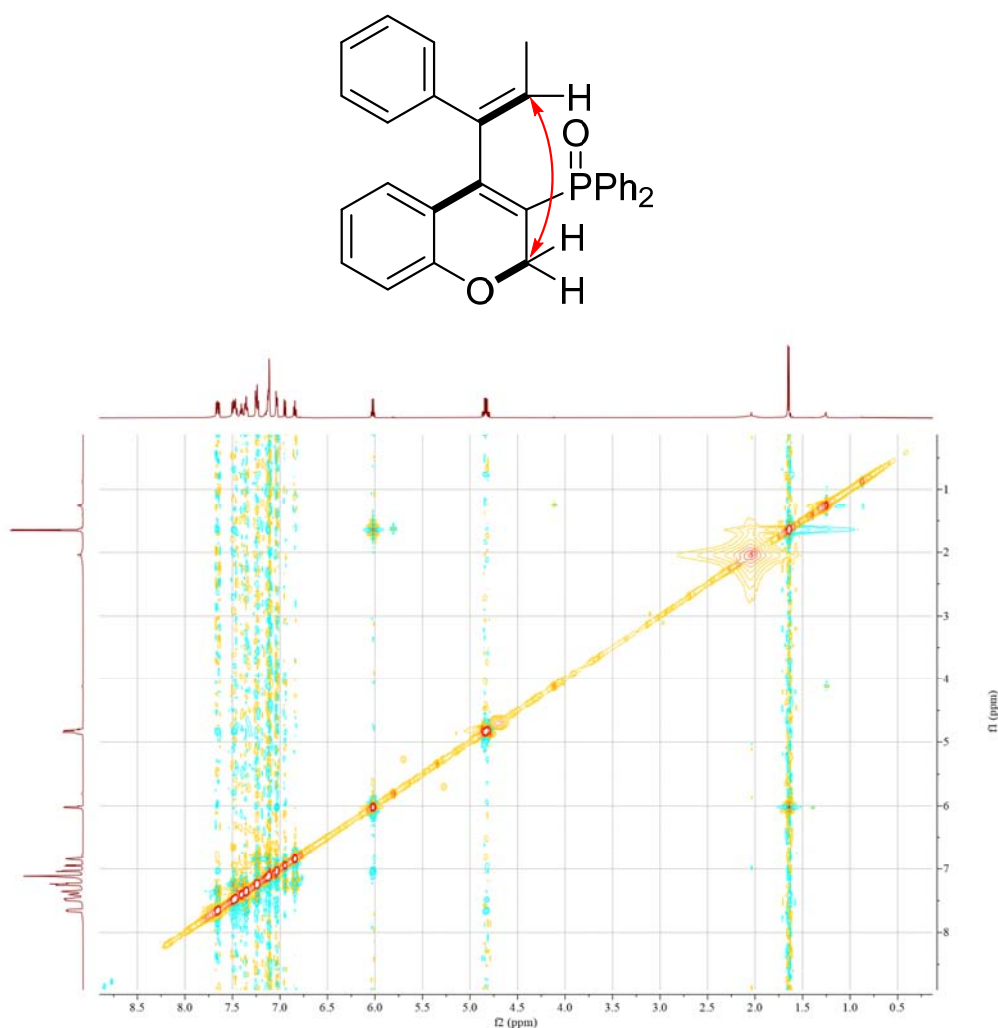

**Figure S1** The key NOE correlations of compound **6i**



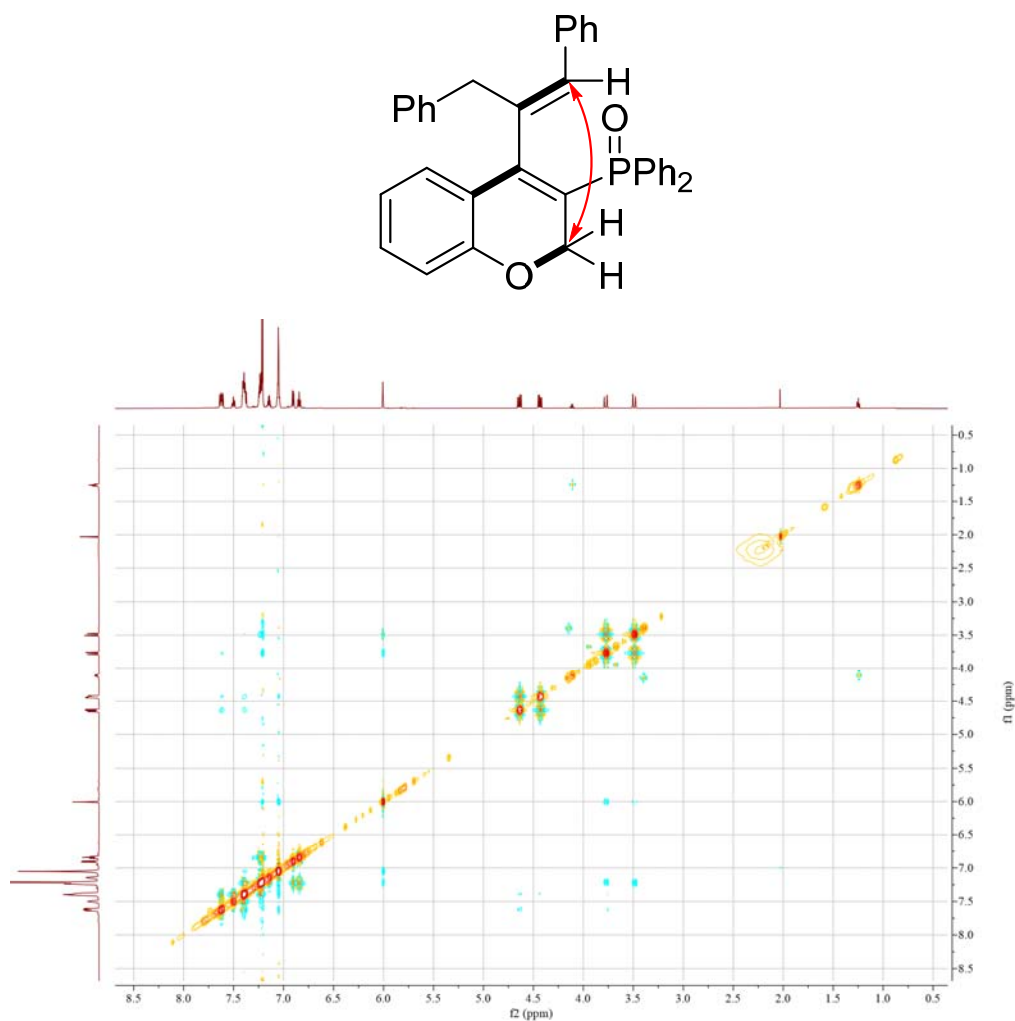

**Figure S2** The key NOE correlations of compound **6j**

## 8. Single Crystal X-Ray Diffraction

The crystal of **3a** (CCDC 2249006) was crystallized by slow vapor diffusion of  $\text{CH}_2\text{Cl}_2$  layered with petroleum ether at room temperature for several days.

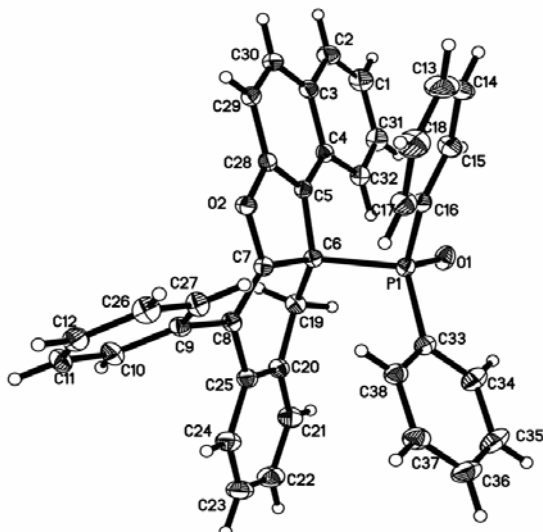

**Figure S3.** X-ray structures of **3a** (ellipsoids set at 50 % probability).

Table 1. Crystal data and structure refinement for Ly200524\_a.

|                                 |                                                  |                  |
|---------------------------------|--------------------------------------------------|------------------|
| Identification code             | Ly200524_a                                       |                  |
| Empirical formula               | C <sub>38</sub> H <sub>27</sub> O <sub>2</sub> P |                  |
| Formula weight                  | 546.56                                           |                  |
| Temperature                     | 296(2) K                                         |                  |
| Wavelength                      | 0.71073 Å                                        |                  |
| Crystal system                  | Monoclinic                                       |                  |
| Space group                     | P2 <sub>1</sub> /c                               |                  |
| Unit cell dimensions            | a = 10.0902(10) Å                                | α = 90°.         |
|                                 | b = 20.276(2) Å                                  | β = 104.978(3)°. |
|                                 | c = 14.0678(15) Å                                | γ = 90°.         |
| Volume                          | 2780.3(5) Å <sup>3</sup>                         |                  |
| Z                               | 4                                                |                  |
| Density (calculated)            | 1.306 Mg/m <sup>3</sup>                          |                  |
| Absorption coefficient          | 0.134 mm <sup>-1</sup>                           |                  |
| F(000)                          | 1144                                             |                  |
| Crystal size                    | 0.250 x 0.220 x 0.200 mm <sup>3</sup>            |                  |
| Theta range for data collection | 2.009 to 27.517°.                                |                  |
| Index ranges                    | -10 ≤ h ≤ 13, -26 ≤ k ≤ 26, -17 ≤ l ≤ 18         |                  |
| Reflections collected           | 16608                                            |                  |
| Independent reflections         | 6321 [R(int) = 0.0326]                           |                  |
| Completeness to theta = 25.242° | 99.0 %                                           |                  |
| Absorption correction           | Semi-empirical from equivalents                  |                  |

|                                   |                                             |
|-----------------------------------|---------------------------------------------|
| Max. and min. transmission        | 0.7456 and 0.6470                           |
| Refinement method                 | Full-matrix least-squares on F <sup>2</sup> |
| Data / restraints / parameters    | 6321 / 0 / 370                              |
| Goodness-of-fit on F <sup>2</sup> | 1.026                                       |
| Final R indices [I>2sigma(I)]     | R1 = 0.0484, wR2 = 0.1093                   |
| R indices (all data)              | R1 = 0.0770, wR2 = 0.1226                   |
| Extinction coefficient            | n/a                                         |
| Largest diff. peak and hole       | 0.241 and -0.337 e.Å <sup>-3</sup>          |

Table 2. Bond lengths [Å] and angles [°] for Ly200524\_a.

---

|             |            |
|-------------|------------|
| P(1)-O(1)   | 1.4805(13) |
| P(1)-C(16)  | 1.8057(19) |
| P(1)-C(33)  | 1.8134(18) |
| P(1)-C(6)   | 1.8914(16) |
| O(2)-C(28)  | 1.389(2)   |
| O(2)-C(7)   | 1.3939(19) |
| C(1)-C(2)   | 1.359(3)   |
| C(1)-C(31)  | 1.404(3)   |
| C(1)-H(1)   | 0.9300     |
| C(2)-C(3)   | 1.415(3)   |
| C(2)-H(2)   | 0.9300     |
| C(3)-C(30)  | 1.412(3)   |
| C(3)-C(4)   | 1.429(2)   |
| C(4)-C(32)  | 1.415(2)   |
| C(4)-C(5)   | 1.418(2)   |
| C(5)-C(28)  | 1.368(2)   |
| C(5)-C(6)   | 1.520(2)   |
| C(6)-C(7)   | 1.507(2)   |
| C(6)-C(19)  | 1.532(2)   |
| C(7)-C(8)   | 1.341(2)   |
| C(8)-C(25)  | 1.482(2)   |
| C(8)-C(9)   | 1.483(2)   |
| C(9)-C(27)  | 1.390(3)   |
| C(9)-C(10)  | 1.394(2)   |
| C(10)-C(11) | 1.376(3)   |
| C(10)-H(10) | 0.9300     |
| C(11)-C(12) | 1.374(3)   |

|              |          |
|--------------|----------|
| C(11)-H(11)  | 0.9300   |
| C(12)-C(26)  | 1.379(3) |
| C(12)-H(12)  | 0.9300   |
| C(13)-C(14)  | 1.363(4) |
| C(13)-C(18)  | 1.370(4) |
| C(13)-H(13)  | 0.9300   |
| C(14)-C(15)  | 1.384(3) |
| C(14)-H(14)  | 0.9300   |
| C(15)-C(16)  | 1.390(3) |
| C(15)-H(15)  | 0.9300   |
| C(16)-C(17)  | 1.383(3) |
| C(17)-C(18)  | 1.391(3) |
| C(17)-H(17)  | 0.9300   |
| C(18)-H(18)  | 0.9300   |
| C(19)-C(20)  | 1.510(2) |
| C(19)-H(19A) | 0.9700   |
| C(19)-H(19B) | 0.9700   |
| C(20)-C(21)  | 1.383(3) |
| C(20)-C(25)  | 1.406(2) |
| C(21)-C(22)  | 1.386(3) |
| C(21)-H(21)  | 0.9300   |
| C(22)-C(23)  | 1.366(3) |
| C(22)-H(22)  | 0.9300   |
| C(23)-C(24)  | 1.378(3) |
| C(23)-H(23)  | 0.9300   |
| C(24)-C(25)  | 1.396(3) |
| C(24)-H(24)  | 0.9300   |
| C(26)-C(27)  | 1.379(3) |
| C(26)-H(26)  | 0.9300   |
| C(27)-H(27)  | 0.9300   |
| C(28)-C(29)  | 1.397(2) |
| C(29)-C(30)  | 1.367(2) |
| C(29)-H(29)  | 0.9300   |
| C(30)-H(30)  | 0.9300   |
| C(31)-C(32)  | 1.366(3) |
| C(31)-H(31)  | 0.9300   |
| C(32)-H(32)  | 0.9300   |
| C(33)-C(38)  | 1.384(3) |

|                  |            |
|------------------|------------|
| C(33)-C(34)      | 1.390(3)   |
| C(34)-C(35)      | 1.382(3)   |
| C(34)-H(34)      | 0.9300     |
| C(35)-C(36)      | 1.377(3)   |
| C(35)-H(35)      | 0.9300     |
| C(36)-C(37)      | 1.372(3)   |
| C(36)-H(36)      | 0.9300     |
| C(37)-C(38)      | 1.384(3)   |
| C(37)-H(37)      | 0.9300     |
| C(38)-H(38)      | 0.9300     |
|                  |            |
| O(1)-P(1)-C(16)  | 111.93(9)  |
| O(1)-P(1)-C(33)  | 110.51(8)  |
| C(16)-P(1)-C(33) | 109.55(8)  |
| O(1)-P(1)-C(6)   | 108.87(7)  |
| C(16)-P(1)-C(6)  | 103.85(8)  |
| C(33)-P(1)-C(6)  | 111.97(8)  |
| C(28)-O(2)-C(7)  | 105.51(12) |
| C(2)-C(1)-C(31)  | 120.15(19) |
| C(2)-C(1)-H(1)   | 119.9      |
| C(31)-C(1)-H(1)  | 119.9      |
| C(1)-C(2)-C(3)   | 121.62(19) |
| C(1)-C(2)-H(2)   | 119.2      |
| C(3)-C(2)-H(2)   | 119.2      |
| C(30)-C(3)-C(2)  | 121.66(18) |
| C(30)-C(3)-C(4)  | 120.14(16) |
| C(2)-C(3)-C(4)   | 118.20(18) |
| C(32)-C(4)-C(5)  | 124.42(16) |
| C(32)-C(4)-C(3)  | 118.66(16) |
| C(5)-C(4)-C(3)   | 116.92(16) |
| C(28)-C(5)-C(4)  | 119.89(16) |
| C(28)-C(5)-C(6)  | 107.26(14) |
| C(4)-C(5)-C(6)   | 132.76(15) |
| C(7)-C(6)-C(5)   | 99.96(13)  |
| C(7)-C(6)-C(19)  | 109.38(13) |
| C(5)-C(6)-C(19)  | 117.43(14) |
| C(7)-C(6)-P(1)   | 113.67(11) |
| C(5)-C(6)-P(1)   | 105.60(11) |

|                   |            |
|-------------------|------------|
| C(19)-C(6)-P(1)   | 110.55(11) |
| C(8)-C(7)-O(2)    | 122.77(15) |
| C(8)-C(7)-C(6)    | 126.23(15) |
| O(2)-C(7)-C(6)    | 110.55(13) |
| C(7)-C(8)-C(25)   | 116.94(15) |
| C(7)-C(8)-C(9)    | 121.75(16) |
| C(25)-C(8)-C(9)   | 121.30(15) |
| C(27)-C(9)-C(10)  | 117.55(17) |
| C(27)-C(9)-C(8)   | 121.24(16) |
| C(10)-C(9)-C(8)   | 121.19(16) |
| C(11)-C(10)-C(9)  | 121.12(18) |
| C(11)-C(10)-H(10) | 119.4      |
| C(9)-C(10)-H(10)  | 119.4      |
| C(12)-C(11)-C(10) | 120.35(19) |
| C(12)-C(11)-H(11) | 119.8      |
| C(10)-C(11)-H(11) | 119.8      |
| C(11)-C(12)-C(26) | 119.65(18) |
| C(11)-C(12)-H(12) | 120.2      |
| C(26)-C(12)-H(12) | 120.2      |
| C(14)-C(13)-C(18) | 120.7(2)   |
| C(14)-C(13)-H(13) | 119.7      |
| C(18)-C(13)-H(13) | 119.7      |
| C(13)-C(14)-C(15) | 120.4(2)   |
| C(13)-C(14)-H(14) | 119.8      |
| C(15)-C(14)-H(14) | 119.8      |
| C(14)-C(15)-C(16) | 119.7(2)   |
| C(14)-C(15)-H(15) | 120.2      |
| C(16)-C(15)-H(15) | 120.2      |
| C(17)-C(16)-C(15) | 119.59(19) |
| C(17)-C(16)-P(1)  | 125.15(15) |
| C(15)-C(16)-P(1)  | 115.13(16) |
| C(16)-C(17)-C(18) | 119.9(2)   |
| C(16)-C(17)-H(17) | 120.1      |
| C(18)-C(17)-H(17) | 120.1      |
| C(13)-C(18)-C(17) | 119.9(3)   |
| C(13)-C(18)-H(18) | 120.1      |
| C(17)-C(18)-H(18) | 120.1      |
| C(20)-C(19)-C(6)  | 112.51(14) |

|                     |            |
|---------------------|------------|
| C(20)-C(19)-H(19A)  | 109.1      |
| C(6)-C(19)-H(19A)   | 109.1      |
| C(20)-C(19)-H(19B)  | 109.1      |
| C(6)-C(19)-H(19B)   | 109.1      |
| H(19A)-C(19)-H(19B) | 107.8      |
| C(21)-C(20)-C(25)   | 119.65(17) |
| C(21)-C(20)-C(19)   | 119.77(17) |
| C(25)-C(20)-C(19)   | 120.50(15) |
| C(20)-C(21)-C(22)   | 120.9(2)   |
| C(20)-C(21)-H(21)   | 119.6      |
| C(22)-C(21)-H(21)   | 119.6      |
| C(23)-C(22)-C(21)   | 119.73(19) |
| C(23)-C(22)-H(22)   | 120.1      |
| C(21)-C(22)-H(22)   | 120.1      |
| C(22)-C(23)-C(24)   | 120.5(2)   |
| C(22)-C(23)-H(23)   | 119.8      |
| C(24)-C(23)-H(23)   | 119.8      |
| C(23)-C(24)-C(25)   | 120.9(2)   |
| C(23)-C(24)-H(24)   | 119.5      |
| C(25)-C(24)-H(24)   | 119.5      |
| C(24)-C(25)-C(20)   | 118.31(17) |
| C(24)-C(25)-C(8)    | 121.94(17) |
| C(20)-C(25)-C(8)    | 119.73(15) |
| C(27)-C(26)-C(12)   | 120.01(19) |
| C(27)-C(26)-H(26)   | 120.0      |
| C(12)-C(26)-H(26)   | 120.0      |
| C(26)-C(27)-C(9)    | 121.30(18) |
| C(26)-C(27)-H(27)   | 119.3      |
| C(9)-C(27)-H(27)    | 119.3      |
| C(5)-C(28)-O(2)     | 113.63(15) |
| C(5)-C(28)-C(29)    | 124.09(16) |
| O(2)-C(28)-C(29)    | 122.27(15) |
| C(30)-C(29)-C(28)   | 116.77(17) |
| C(30)-C(29)-H(29)   | 121.6      |
| C(28)-C(29)-H(29)   | 121.6      |
| C(29)-C(30)-C(3)    | 122.18(17) |
| C(29)-C(30)-H(30)   | 118.9      |
| C(3)-C(30)-H(30)    | 118.9      |

|                   |            |
|-------------------|------------|
| C(32)-C(31)-C(1)  | 120.32(19) |
| C(32)-C(31)-H(31) | 119.8      |
| C(1)-C(31)-H(31)  | 119.8      |
| C(31)-C(32)-C(4)  | 121.03(18) |
| C(31)-C(32)-H(32) | 119.5      |
| C(4)-C(32)-H(32)  | 119.5      |
| C(38)-C(33)-C(34) | 119.05(18) |
| C(38)-C(33)-P(1)  | 126.77(14) |
| C(34)-C(33)-P(1)  | 114.17(15) |
| C(35)-C(34)-C(33) | 120.1(2)   |
| C(35)-C(34)-H(34) | 120.0      |
| C(33)-C(34)-H(34) | 120.0      |
| C(36)-C(35)-C(34) | 120.1(2)   |
| C(36)-C(35)-H(35) | 119.9      |
| C(34)-C(35)-H(35) | 119.9      |
| C(37)-C(36)-C(35) | 120.3(2)   |
| C(37)-C(36)-H(36) | 119.8      |
| C(35)-C(36)-H(36) | 119.8      |
| C(36)-C(37)-C(38) | 119.8(2)   |
| C(36)-C(37)-H(37) | 120.1      |
| C(38)-C(37)-H(37) | 120.1      |
| C(33)-C(38)-C(37) | 120.62(19) |
| C(33)-C(38)-H(38) | 119.7      |
| C(37)-C(38)-H(38) | 119.7      |

---

Symmetry transformations used to generate equivalent atoms:

Table 3. Hydrogen bonds for Ly200524\_a [Å and °].

| D-H...A            | d(D-H) | d(H...A) | d(D...A) | <(DHA) |
|--------------------|--------|----------|----------|--------|
| C(34)-H(34)...O(1) | 0.93   | 2.44     | 2.904(2) | 110.8  |

---

Symmetry transformations used to generate equivalent atoms:



The crystal of **6c** (CCDC 2249732) was crystallized by slow vapor diffusion of CH<sub>2</sub>Cl<sub>2</sub> layered with petroleum ether at room temperature for several days.

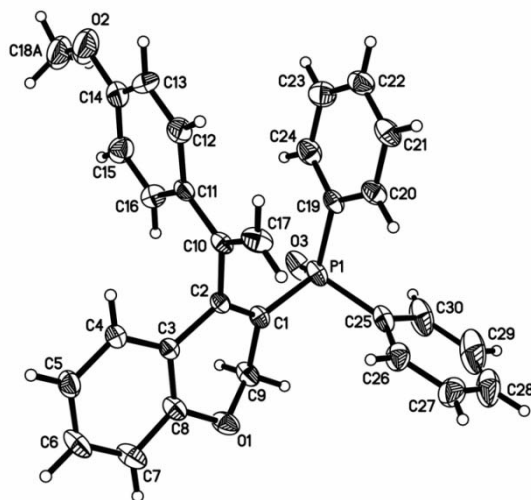

**Figure S4.** X-ray structures of **6c** (ellipsoids set at 50 % probability).

Table 1. Crystal data and structure refinement for Ly201215\_a.

|                                 |                                                  |                 |
|---------------------------------|--------------------------------------------------|-----------------|
| Identification code             | Ly201215_a                                       |                 |
| Empirical formula               | C <sub>30</sub> H <sub>27</sub> O <sub>4</sub> P |                 |
| Formula weight                  | 482.48                                           |                 |
| Temperature                     | 296(2) K                                         |                 |
| Wavelength                      | 0.71073 Å                                        |                 |
| Crystal system                  | Triclinic                                        |                 |
| Space group                     | P-1                                              |                 |
| Unit cell dimensions            | a = 8.9061(16) Å                                 | α = 74.291(5)°. |
|                                 | b = 10.4242(18) Å                                | β = 76.463(5)°. |
|                                 | c = 14.312(3) Å                                  | γ = 86.731(5)°. |
| Volume                          | 1243.6(4) Å <sup>3</sup>                         |                 |
| Z                               | 2                                                |                 |
| Density (calculated)            | 1.289 Mg/m <sup>3</sup>                          |                 |
| Absorption coefficient          | 0.145 mm <sup>-1</sup>                           |                 |
| F(000)                          | 508                                              |                 |
| Crystal size                    | 0.220 x 0.200 x 0.180 mm <sup>3</sup>            |                 |
| Theta range for data collection | 1.518 to 24.996°.                                |                 |
| Index ranges                    | -10 ≤ h ≤ 10, -12 ≤ k ≤ 12, -16 ≤ l ≤ 16         |                 |
| Reflections collected           | 15418                                            |                 |

|                                   |                                             |
|-----------------------------------|---------------------------------------------|
| Independent reflections           | 4344 [R(int) = 0.0382]                      |
| Completeness to theta = 24.996°   | 99.1 %                                      |
| Absorption correction             | Semi-empirical from equivalents             |
| Max. and min. transmission        | 0.7456 and 0.6641                           |
| Refinement method                 | Full-matrix least-squares on F <sup>2</sup> |
| Data / restraints / parameters    | 4344 / 16 / 329                             |
| Goodness-of-fit on F <sup>2</sup> | 1.033                                       |
| Final R indices [I>2sigma(I)]     | R1 = 0.0708, wR2 = 0.1859                   |
| R indices (all data)              | R1 = 0.1135, wR2 = 0.2153                   |
| Extinction coefficient            | n/a                                         |
| Largest diff. peak and hole       | 0.708 and -0.495 e.Å <sup>-3</sup>          |

Table 2. Bond lengths [Å] and angles [°] for Ly201215\_a.

---

|             |          |
|-------------|----------|
| C(1)-C(2)   | 1.347(4) |
| C(1)-C(9)   | 1.517(5) |
| C(1)-P(1)   | 1.800(3) |
| C(2)-C(3)   | 1.482(4) |
| C(2)-C(10)  | 1.497(4) |
| C(3)-C(8)   | 1.384(5) |
| C(3)-C(4)   | 1.395(5) |
| C(4)-C(5)   | 1.380(5) |
| C(4)-H(4)   | 0.9300   |
| C(5)-C(6)   | 1.356(6) |
| C(5)-H(5)   | 0.9300   |
| C(6)-C(7)   | 1.381(6) |
| C(6)-H(6)   | 0.9300   |
| C(7)-C(8)   | 1.380(5) |
| C(7)-H(7)   | 0.9300   |
| C(8)-O(1)   | 1.383(4) |
| C(9)-O(1)   | 1.395(5) |
| C(9)-H(9A)  | 0.9700   |
| C(9)-H(9B)  | 0.9700   |
| C(10)-C(17) | 1.315(5) |
| C(10)-C(11) | 1.477(5) |
| C(11)-C(16) | 1.383(5) |
| C(11)-C(12) | 1.389(5) |
| C(12)-C(13) | 1.401(7) |

|              |           |
|--------------|-----------|
| C(12)-H(12)  | 0.9300    |
| C(13)-C(14)  | 1.346(7)  |
| C(13)-H(13)  | 0.9300    |
| C(14)-C(15)  | 1.331(6)  |
| C(14)-O(2)   | 1.416(6)  |
| C(15)-C(16)  | 1.382(6)  |
| C(15)-H(15)  | 0.9300    |
| C(16)-H(16)  | 0.9300    |
| C(17)-H(17A) | 0.9300    |
| C(17)-H(17B) | 0.9300    |
| C(19)-C(24)  | 1.374(6)  |
| C(19)-C(20)  | 1.383(5)  |
| C(19)-P(1)   | 1.796(4)  |
| C(20)-C(21)  | 1.376(5)  |
| C(20)-H(20)  | 0.9300    |
| C(21)-C(22)  | 1.366(6)  |
| C(21)-H(21)  | 0.9300    |
| C(22)-C(23)  | 1.362(6)  |
| C(22)-H(22)  | 0.9300    |
| C(23)-C(24)  | 1.374(6)  |
| C(23)-H(23)  | 0.9300    |
| C(24)-H(24)  | 0.9300    |
| C(25)-C(26)  | 1.381(6)  |
| C(25)-C(30)  | 1.385(6)  |
| C(25)-P(1)   | 1.805(5)  |
| C(26)-C(27)  | 1.391(7)  |
| C(26)-H(26)  | 0.9300    |
| C(27)-C(28)  | 1.345(9)  |
| C(27)-H(27)  | 0.9300    |
| C(28)-C(29)  | 1.362(11) |
| C(28)-H(28)  | 0.9300    |
| C(29)-C(30)  | 1.400(10) |
| C(29)-H(29)  | 0.9300    |
| C(30)-H(30)  | 0.9300    |
| O(2)-C(18A)  | 1.394(8)  |
| O(2)-C(18B)  | 1.405(9)  |
| O(3)-P(1)    | 1.489(3)  |
| O(4)-H(4A)   | 0.8499    |

|                 |           |
|-----------------|-----------|
| O(4)-H(4B)      | 0.8501    |
| C(18A)-C(18A)#1 | 1.877(18) |
| C(18A)-H(18A)   | 0.9600    |
| C(18A)-H(18B)   | 0.9600    |
| C(18A)-H(18C)   | 0.9600    |
| C(18B)-H(18D)   | 0.9601    |
| C(18B)-H(18E)   | 0.9600    |
| C(18B)-H(18F)   | 0.9600    |
|                 |           |
| C(2)-C(1)-C(9)  | 117.8(3)  |
| C(2)-C(1)-P(1)  | 130.9(3)  |
| C(9)-C(1)-P(1)  | 110.6(2)  |
| C(1)-C(2)-C(3)  | 117.3(3)  |
| C(1)-C(2)-C(10) | 125.3(3)  |
| C(3)-C(2)-C(10) | 117.4(3)  |
| C(8)-C(3)-C(4)  | 117.6(3)  |
| C(8)-C(3)-C(2)  | 118.9(3)  |
| C(4)-C(3)-C(2)  | 123.4(3)  |
| C(5)-C(4)-C(3)  | 120.9(4)  |
| C(5)-C(4)-H(4)  | 119.6     |
| C(3)-C(4)-H(4)  | 119.6     |
| C(6)-C(5)-C(4)  | 120.2(4)  |
| C(6)-C(5)-H(5)  | 119.9     |
| C(4)-C(5)-H(5)  | 119.9     |
| C(5)-C(6)-C(7)  | 120.7(4)  |
| C(5)-C(6)-H(6)  | 119.6     |
| C(7)-C(6)-H(6)  | 119.6     |
| C(8)-C(7)-C(6)  | 119.0(4)  |
| C(8)-C(7)-H(7)  | 120.5     |
| C(6)-C(7)-H(7)  | 120.5     |
| C(7)-C(8)-O(1)  | 117.5(4)  |
| C(7)-C(8)-C(3)  | 121.6(4)  |
| O(1)-C(8)-C(3)  | 120.7(3)  |
| O(1)-C(9)-C(1)  | 113.4(3)  |
| O(1)-C(9)-H(9A) | 108.9     |
| C(1)-C(9)-H(9A) | 108.9     |
| O(1)-C(9)-H(9B) | 108.9     |
| C(1)-C(9)-H(9B) | 108.9     |

|                     |          |
|---------------------|----------|
| H(9A)-C(9)-H(9B)    | 107.7    |
| C(17)-C(10)-C(11)   | 124.2(3) |
| C(17)-C(10)-C(2)    | 119.2(3) |
| C(11)-C(10)-C(2)    | 116.7(3) |
| C(16)-C(11)-C(12)   | 114.6(4) |
| C(16)-C(11)-C(10)   | 122.1(3) |
| C(12)-C(11)-C(10)   | 123.3(4) |
| C(11)-C(12)-C(13)   | 121.4(4) |
| C(11)-C(12)-H(12)   | 119.3    |
| C(13)-C(12)-H(12)   | 119.3    |
| C(14)-C(13)-C(12)   | 121.0(4) |
| C(14)-C(13)-H(13)   | 119.5    |
| C(12)-C(13)-H(13)   | 119.5    |
| C(15)-C(14)-C(13)   | 119.1(5) |
| C(15)-C(14)-O(2)    | 123.6(6) |
| C(13)-C(14)-O(2)    | 117.3(5) |
| C(14)-C(15)-C(16)   | 120.9(5) |
| C(14)-C(15)-H(15)   | 119.5    |
| C(16)-C(15)-H(15)   | 119.5    |
| C(15)-C(16)-C(11)   | 123.0(4) |
| C(15)-C(16)-H(16)   | 118.5    |
| C(11)-C(16)-H(16)   | 118.5    |
| C(10)-C(17)-H(17A)  | 120.0    |
| C(10)-C(17)-H(17B)  | 120.0    |
| H(17A)-C(17)-H(17B) | 120.0    |
| C(24)-C(19)-C(20)   | 118.0(4) |
| C(24)-C(19)-P(1)    | 118.3(3) |
| C(20)-C(19)-P(1)    | 123.7(3) |
| C(21)-C(20)-C(19)   | 120.5(4) |
| C(21)-C(20)-H(20)   | 119.7    |
| C(19)-C(20)-H(20)   | 119.7    |
| C(22)-C(21)-C(20)   | 120.7(4) |
| C(22)-C(21)-H(21)   | 119.6    |
| C(20)-C(21)-H(21)   | 119.6    |
| C(23)-C(22)-C(21)   | 119.1(4) |
| C(23)-C(22)-H(22)   | 120.4    |
| C(21)-C(22)-H(22)   | 120.4    |
| C(22)-C(23)-C(24)   | 120.6(4) |

|                        |            |
|------------------------|------------|
| C(22)-C(23)-H(23)      | 119.7      |
| C(24)-C(23)-H(23)      | 119.7      |
| C(23)-C(24)-C(19)      | 121.0(4)   |
| C(23)-C(24)-H(24)      | 119.5      |
| C(19)-C(24)-H(24)      | 119.5      |
| C(26)-C(25)-C(30)      | 118.9(5)   |
| C(26)-C(25)-P(1)       | 122.7(3)   |
| C(30)-C(25)-P(1)       | 118.4(4)   |
| C(25)-C(26)-C(27)      | 120.6(5)   |
| C(25)-C(26)-H(26)      | 119.7      |
| C(27)-C(26)-H(26)      | 119.7      |
| C(28)-C(27)-C(26)      | 120.1(7)   |
| C(28)-C(27)-H(27)      | 119.9      |
| C(26)-C(27)-H(27)      | 119.9      |
| C(27)-C(28)-C(29)      | 120.5(7)   |
| C(27)-C(28)-H(28)      | 119.7      |
| C(29)-C(28)-H(28)      | 119.7      |
| C(28)-C(29)-C(30)      | 120.6(6)   |
| C(28)-C(29)-H(29)      | 119.7      |
| C(30)-C(29)-H(29)      | 119.7      |
| C(25)-C(30)-C(29)      | 119.2(7)   |
| C(25)-C(30)-H(30)      | 120.4      |
| C(29)-C(30)-H(30)      | 120.4      |
| C(8)-O(1)-C(9)         | 113.4(3)   |
| C(18A)-O(2)-C(14)      | 123.3(7)   |
| C(18B)-O(2)-C(14)      | 131.6(10)  |
| H(4A)-O(4)-H(4B)       | 104.5      |
| O(3)-P(1)-C(19)        | 111.39(18) |
| O(3)-P(1)-C(1)         | 108.32(15) |
| C(19)-P(1)-C(1)        | 114.06(16) |
| O(3)-P(1)-C(25)        | 111.69(19) |
| C(19)-P(1)-C(25)       | 107.13(17) |
| C(1)-P(1)-C(25)        | 104.05(18) |
| O(2)-C(18A)-C(18A)#1   | 175.9(11)  |
| O(2)-C(18A)-H(18A)     | 110.0      |
| C(18A)#1-C(18A)-H(18A) | 66.0       |
| O(2)-C(18A)-H(18B)     | 109.7      |
| C(18A)#1-C(18A)-H(18B) | 73.3       |

|                        |       |
|------------------------|-------|
| H(18A)-C(18A)-H(18B)   | 109.5 |
| O(2)-C(18A)-H(18C)     | 108.7 |
| C(18A)#1-C(18A)-H(18C) | 72.3  |
| H(18A)-C(18A)-H(18C)   | 109.5 |
| H(18B)-C(18A)-H(18C)   | 109.5 |
| O(2)-C(18B)-H(18D)     | 109.5 |
| O(2)-C(18B)-H(18E)     | 113.0 |
| H(18D)-C(18B)-H(18E)   | 109.5 |
| O(2)-C(18B)-H(18F)     | 105.8 |
| H(18D)-C(18B)-H(18F)   | 109.5 |
| H(18E)-C(18B)-H(18F)   | 109.5 |

Symmetry transformations used to generate equivalent atoms:

#1 -x+1,-y,-z+1

Table 3. Hydrogen bonds for Ly201215\_a [Å and °].

| D-H...A                                              | d(D-H) | d(H...A) | d(D...A)  | <(DHA) |
|------------------------------------------------------|--------|----------|-----------|--------|
| C(18B <sup>^b</sup> )-H(18F <sup>^b</sup> )...O(4)#2 | 0.96   | 2.57     | 3.359(18) | 139.1  |

Symmetry transformations used to generate equivalent atoms:

#1 -x+1,-y,-z+1    #2 -x,-y+1,-z+1

## 9. Derivatization of Product 5a

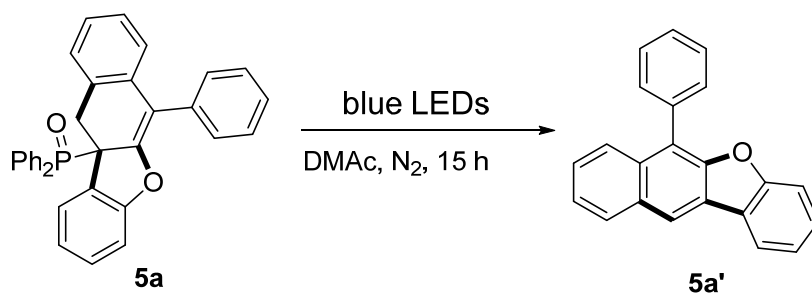

**5a** (100 mg, 0.2 mmol) was added into a 25 mL Schlenk tube. The vessel was evacuated and backfilled with N<sub>2</sub> three times, DMAc (2 mL) was added via a syringe. Then, the reaction was stirred at room temperature under the irradiation of blue LED (450 ± 5 nm, 25 W) for 20 h. Upon completion of the reaction, water (30.0 mL) was added and

extracted with EtOAc twice. Combined organic layer was dried over anhydrous Na<sub>2</sub>SO<sub>4</sub>, and the solvent was removed under reduced pressure to afford the crude product, which was further purified by flash column chromatography (ethyl acetate/petroleum ether = 1/50) to afford the desired product **5a'** in 81% yield (47.6 mg).

**5a'**: A white solid, <sup>1</sup>H NMR (500 MHz, CDCl<sub>3</sub>) δ 8.44 (s, 1H), 8.10-8.07 (m, 2H), 7.94 (d, *J* = 10.0 Hz, 1H), 7.65-7.60 (m, 4H), 7.55-7.45 (m, 5H), 7.38-7.35 (m, 1H).

## 10. Mechanistic Studies

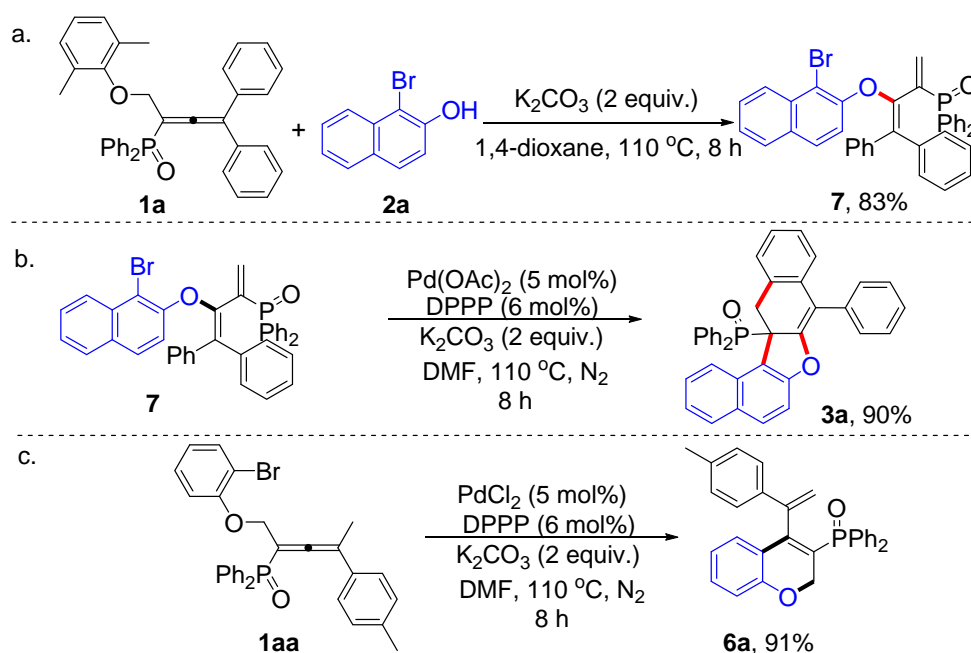

## 11. Characterizations of Products

diphenyl(8-phenyldinaphtho[2,1-b:2',3'-d]furan-13a(13H)-yl)phosphine oxide (**3a**)

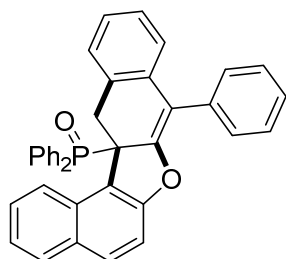

A white solid, (80 mg, 73% yield). <sup>1</sup>H NMR (400 MHz, CDCl<sub>3</sub>) δ 8.45 (d, *J* = 8.0 Hz, 1H), 7.60–7.44 (m, 6H), 7.41–7.35 (m, 5H), 7.29–7.27 (m, 2H), 7.19–7.15 (m, 1H), 7.03–6.98 (m, 1H), 6.96–6.90 (m, 5H), 6.88–6.83 (m, 2H), 6.66–6.62 (m, 1H), 6.18 (d,



$J = 8.0$  Hz, 1H), 4.71–6.65 (m, 1H), 3.64–3.52 (m, 1H).  $^{13}\text{C}$  NMR (101 MHz,  $\text{CDCl}_3$ )  $\delta$  157.13 (d,  $J = 6.1$  Hz), 153.76 (d,  $J = 5.1$  Hz), 136.18 (d,  $J = 5.1$  Hz), 134.90 (d,  $J = 5.1$  Hz), 131.25 (d,  $J = 9.1$  Hz), 131.07, 130.72, 130.69 (d,  $J = 206.0$  Hz), 130.56, 130.40 (dd,  $J = 11.1, 3.0$  Hz), 130.13, 130.04, 128.49, 128.38, 128.30, 127.57, 127.43, 127.27, 127.15, 126.59, 125.70, 124.57 (d,  $J = 105.0$  Hz), 120.87 (d,  $J = 4.0$  Hz), 116.44 (d,  $J = 11.1$  Hz), 111.34 (d,  $J = 3.0$  Hz), 55.55 (d,  $J = 55.6$  Hz), 35.72.  $^{31}\text{P}$  NMR (162 MHz,  $\text{CDCl}_3$ )  $\delta$  29.71. **HRMS (ESI):** ( $[\text{M}+\text{H}]^+$ ) Calcd for  $\text{C}_{38}\text{H}_{28}\text{O}_2\text{P}^+$ : 547.1821, Found: 547.1816.

**(11-methyl-8-(p-tolyl)dinaphtho[2,1-b:2',3'-d]furan-13a(13H)-yl)diphenylphosphine oxide (3b)**

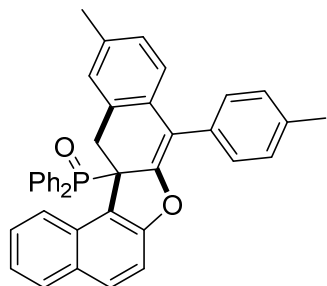

A white solid, (59 mg, 51% yield)  $^1\text{H}$  NMR (400 MHz,  $\text{CDCl}_3$ )  $\delta$  8.59 (d,  $J = 8.0$  Hz, 1H), 7.72–7.62 (m, 5H), 7.61–7.53 (m, 2H), 7.42 (d,  $J = 8.0$  Hz, 2H), 7.34–7.28 (m, 3H), 7.24 (s, 1H), 7.17–7.05 (m, 5H), 7.03–6.99 (m, 2H), 6.59 (d,  $J = 8.0$  Hz, 1H), 6.21 (d,  $J = 8.0$  Hz, 1H), 4.77–4.70 (m, 1H), 3.74–3.62 (m, 1H), 2.48 (s, 3H), 2.34 (s, 3H).  $^{13}\text{C}$  NMR (101 MHz,  $\text{CDCl}_3$ )  $\delta$  157.21 (d,  $J = 5.8$  Hz), 152.63 (d,  $J = 5.8$  Hz), 137.23, 136.26, 133.48 (d,  $J = 4.7$  Hz), 131.96 (d,  $J = 4.3$  Hz), 131.21 (d,  $J = 8.5$  Hz), 131.00 (d,  $J = 2.9$  Hz), 130.60, 130.27 (d,  $J = 110.1$  Hz), 130.06 (d,  $J = 8.5$  Hz), 129.92 (d,  $J = 3.3$  Hz), 129.10, 129.06, 128.43, 127.81, 127.33 (d,  $J = 11.5$  Hz), 127.15, 127.04 (d,  $J = 11.7$  Hz), 125.66, 125.09, 123.93, 120.84 (d,  $J = 4.0$  Hz), 116.32 (d,  $J = 11.2$  Hz), 111.39 (d,  $J = 2.6$  Hz), 55.49 (d,  $J = 55.9$  Hz), 35.77, 21.44, 21.08.  $^{31}\text{P}$  NMR (162 MHz,  $\text{CDCl}_3$ )  $\delta$  29.71. **HRMS (ESI):** ( $[\text{M}+\text{Na}]^+$ ) Calcd for  $\text{C}_{40}\text{H}_{31}\text{NaO}_2\text{P}^+$ : 597.1954, Found: 597.1949.

**(11-methoxy-8-(4-methoxyphenyl)dinaphtho[2,1-b:2',3'-d]furan-13a(13H)-yl)diphenylphosphine oxide (3c)**

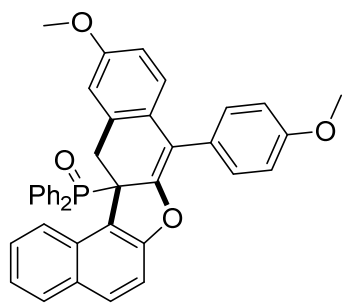

A white solid, (59 mg, 49% yield).  $^1\text{H NMR}$  (500 MHz,  $\text{CDCl}_3$ )  $\delta$  8.55 (d,  $J = 5.0$  Hz, 1H), 7.73–7.69 (m, 2H), 7.64–7.58 (m, 3H), 7.56–7.53 (m, 1H), 7.49 (d,  $J = 10.0$  Hz, 1H), 7.43 (d,  $J = 10.0$  Hz, 2H), 7.28–7.25 (m, 1H), 7.14–7.11 (m, 1H), 7.09–7.04 (m, 3H), 7.03–7.01 (m, 3H), 6.99–6.97 (m, 3H), 6.31 (d,  $J = 10.0$  Hz, 1H), 6.22 (d,  $J = 10.0$  Hz, 1H), 4.73–4.68 (m, 1H), 3.87 (s, 3H), 3.82 (s, 3H), 3.70–3.60 (m, 1H).  $^{13}\text{C NMR}$  (126 MHz,  $\text{CDCl}_3$ )  $\delta$  158.77 (d,  $J = 58.0$  Hz), 157.36 (d,  $J = 6.3$  Hz), 151.37 (d,  $J = 6.3$  Hz), 132.51 (d,  $J = 5.0$  Hz), 131.73, 131.22, 131.16, 130.81, 130.56, 130.46 (d,  $J = 126.0$  Hz), 130.31, 130.12 (d,  $J = 7.6$  Hz), 129.28 (d,  $J = 5.0$  Hz), 128.53, 127.42 (d,  $J = 11.3$  Hz), 127.22, 127.13, 126.88, 125.11, 123.98, 120.79 (d,  $J = 3.8$  Hz), 115.99 (d,  $J = 11.3$  Hz), 113.87, 113.01, 111.46 (d,  $J = 2.5$  Hz), 55.58, 55.42 (d,  $J = 56.7$  Hz), 55.40, 36.13.  $^{31}\text{P NMR}$  (202 MHz,  $\text{CDCl}_3$ )  $\delta$  30.08. **HRMS (ESI):** ( $[\text{M} + \text{Na}]^+$ ) Calcd for  $\text{C}_{40}\text{H}_{31}\text{NaO}_4\text{P}^+$ : 629.1852, Found: 629.1848.

**(11-(tert-butyl)-8-(4-(tert-butyl)phenyl)dinaphtho[2,1-b:2',3'-d]furan-13a(13H)-yl)diphenylphosphine oxide (3d)**

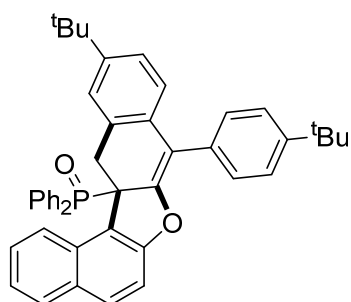

A white solid, (79 mg, 60% yield).  $^1\text{H NMR}$  (500 MHz,  $\text{CDCl}_3$ )  $\delta$  8.61 (d,  $J = 5.0$  Hz, 1H), 7.69–7.66 (m, 2H), 7.64–7.57 (m, 4H), 7.52–7.47 (m, 5H), 7.43 (s, 1H), 7.31–7.28 (m, 1H), 7.12–7.09 (m, 1H), 7.07–7.02 (m, 4H), 7.00–6.96 (m, 2H), 6.77 (d,  $J = 10.0$  Hz, 1H), 6.29 (d,  $J = 5.0$  Hz, 1H), 4.78–4.73 (m, 1H), 3.74–3.65 (m, 1H), 1.42 (s, 9H), 1.37 (s, 9H).  $^{13}\text{C NMR}$  (126 MHz,  $\text{CDCl}_3$ )  $\delta$  157.35 (d,  $J = 5.7$  Hz), 152.92 (d,  $J = 5.7$  Hz), 149.96 (d,  $J = 98.8$  Hz), 133.56 (d,  $J = 4.5$  Hz), 131.88, 131.22 (d,  $J = 8.4$  Hz),

131.07, 130.87 (d,  $J = 238.1$  Hz), 130.56, 130.34, 130.10 (d,  $J = 8.4$  Hz), 129.75, 128.51, 127.42 (d,  $J = 11.4$  Hz), 127.27, 127.19 (d,  $J = 3.4$  Hz), 125.58 (d,  $J = 11.4$  Hz), 125.29, 124.07 (d,  $J = 13.6$  Hz), 120.84 (d,  $J = 4.0$  Hz), 116.38 (d,  $J = 11.3$  Hz), 111.55, 55.83 (d,  $J = 55.8$  Hz), 36.19, 34.80, 34.61, 31.54, 31.48.  $^{31}\text{P}$  NMR (202 MHz,  $\text{CDCl}_3$ )  $\delta$  29.99. **HRMS (ESI):** ( $[\text{M}+\text{Na}]^+$ ) Calcd for  $\text{C}_{46}\text{H}_{43}\text{NaO}_2\text{P}^+$ : 681.2893, Found: 681.2879.

**(11-(methylthio)-8-(4-(methylthio)phenyl)dinaphtho[2,1-b:2',3'-d]furan-13a(13H)-yl)diphenylphosphine oxide (3e)**

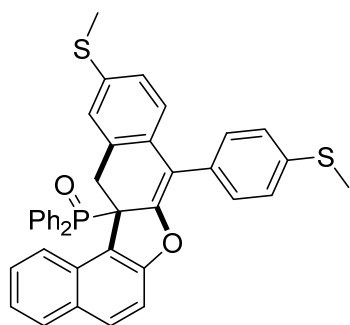

A white solid, (47 mg, 37% yield).  $^1\text{H}$  NMR (500 MHz,  $\text{CDCl}_3$ )  $\delta$  8.52 (d,  $J = 10.0$  Hz, 1H), 7.68–7.64 (m, 2H), 7.61–7.57 (m, 3H), 7.55–7.50 (m, 2H), 7.41 (d,  $J = 5.0$  Hz, 2H), 7.35 (d,  $J = 10.0$  Hz, 2H), 7.30–7.27 (m, 2H), 7.14–7.12 (m, 1H), 7.08–7.05 (m, 3H), 7.02 (d,  $J = 10.0$  Hz, 1H), 6.99–6.96 (m, 2H), 6.65 (d,  $J = 5.0$  Hz, 1H), 6.18 (d,  $J = 10.0$  Hz, 1H), 4.74–4.69 (m, 1H), 3.68–3.58 (m, 1H), 2.55 (s, 3H), 2.52 (s, 3H).  $^{13}\text{C}$  NMR (126 MHz,  $\text{CDCl}_3$ )  $\delta$  157.15 (d,  $J = 6.3$  Hz), 153.18, 137.94, 136.66, 133.27, 131.62, 131.29, 131.22, 130.90, 130.70, 130.55 (d,  $J = 228.1$  Hz), 130.44, 130.06 (d,  $J = 8.8$  Hz), 128.55, 127.48 (d,  $J = 11.3$  Hz), 127.33, 127.23, 126.43, 126.30, 125.90, 125.07, 124.14, 120.69, 115.70 (d,  $J = 10.1$  Hz), 111.35, 55.62 (d,  $J = 55.4$  Hz), 35.78, 16.23, 15.76.  $^{31}\text{P}$  NMR (202 MHz,  $\text{CDCl}_3$ )  $\delta$  30.23. **HRMS (ESI):** ( $[\text{M}+\text{Na}]^+$ ) Calcd for  $\text{C}_{40}\text{H}_{31}\text{NaO}_2\text{PS}_2^+$ : 661.1395, Found: 661.1392.

**(11-fluoro-8-(4-fluorophenyl)dinaphtho[2,1-b:2',3'-d]furan-13a(13H)-yl)diphenylphosphine oxide (3f)**

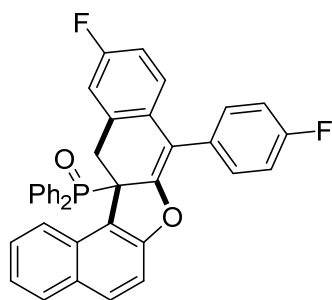

A white solid, (68 mg, 58% yield). **<sup>1</sup>H NMR** (400 MHz, CDCl<sub>3</sub>) δ 8.53 (d, *J* = 8.0 Hz, 1H), 7.75–7.70 (m, 2H), 7.64–7.54 (m, 5H), 7.49–7.45 (m, 2H), 7.34–7.30 (m, 1H), 7.23–7.19 (m, 3H), 7.16–7.08 (m, 4H), 7.07–6.98 (m, 3H), 6.52–6.48 (m, 1H), 6.25–6.22 (m, 1H), 4.79–4.73 (m, 1H), 3.72–3.60 (m, 1H). **<sup>13</sup>C NMR** (151 MHz, CDCl<sub>3</sub>) δ 162.65 (d, *J* = 96.6 Hz), 161.01 (d, *J* = 96.6 Hz), 156.97 (d, *J* = 4.5 Hz), 153.35 (d, *J* = 6.0 Hz), 133.22 (dd, *J* = 9.1, 4.5 Hz), 132.18, 131.59 (dd, *J* = 7.6, 3.0 Hz), 131.20, 131.14, 130.85 (dd, *J* = 31.7, 3.0 Hz), 130.51 (dd, *J* = 9.1, 4.5 Hz), 130.34 (d, *J* = 4.5 Hz), 129.99 (d, *J* = 7.6 Hz), 128.49, 127.43, 127.36, 127.27 (d, *J* = 12.1 Hz), 126.79 (d, *J* = 9.1 Hz), 124.91, 124.13, 120.46 (d, *J* = 3.0 Hz), 115.53 (d, *J* = 22.7 Hz), 115.46 (d, *J* = 21.1 Hz), 114.75 (d, *J* = 10.6 Hz), 113.77 (d, *J* = 21.1 Hz), 111.18, 55.35 (d, *J* = 55.9 Hz), 35.59. **<sup>31</sup>P NMR** (162 MHz, CDCl<sub>3</sub>) δ 29.50. **<sup>19</sup>F NMR** (376 MHz, CDCl<sub>3</sub>) δ -113.80 (s), -115.38 (s). **HRMS (ESI):** ([M+Na]<sup>+</sup>) Calcd for C<sub>38</sub>H<sub>25</sub>F<sub>2</sub>NaO<sub>2</sub>P<sup>+</sup>: 605.1452, Found: 605.1450.

**(11-chloro-8-(4-chlorophenyl)dinaphtho[2,1-b:2',3'-d]furan-13a(13H)-yl)diphenylphosphine oxide (3g)**

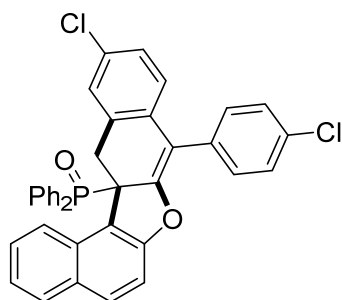

A white solid, (81 mg, 66% yield). **<sup>1</sup>H NMR** (400 MHz, CDCl<sub>3</sub>) δ 8.53 (d, *J* = 8.0 Hz, 1H), 7.72–7.68 (m, 2H), 7.65–7.55 (m, 5H), 7.48 (d, *J* = 8.0 Hz, 2H), 7.44–7.42 (m, 3H), 7.34–7.31 (m, 1H), 7.22–7.18 (m, 1H), 7.16–7.10 (m, 3H), 7.07–6.99 (m, 3H), 6.76 (d, *J* = 8.0 Hz, 1H), 6.19 (d, *J* = 8.0 Hz, 1H), 4.78–4.72 (m, 1H), 3.70–3.58 (m, 1H). **<sup>13</sup>C NMR** (101 MHz, CDCl<sub>3</sub>) δ 156.87 (d, *J* = 6.1 Hz), 154.38 (d, *J* = 6.1 Hz),

134.35 (d,  $J = 5.1$  Hz), 133.48, 132.79 (d,  $J = 4.0$  Hz), 132.66 (d,  $J = 5.1$  Hz), 132.09, 131.26, 131.18, 130.93 (dd,  $J = 18.2, 3.0$  Hz), 130.38, 130.23, 129.97 (d,  $J = 8.1$  Hz), 128.74, 128.53, 128.40, 127.40 (d,  $J = 25.3$  Hz), 127.40, 127.33, 126.46, 124.91, 124.24, 120.42, 114.56 (d,  $J = 10.1$  Hz), 111.14, 55.52 (d,  $J = 54.5$  Hz), 35.34.  **$^{31}\text{P}$  NMR** (162 MHz,  $\text{CDCl}_3$ )  $\delta$  29.60. **HRMS (ESI):** ( $[\text{M}+\text{Na}]^+$ ) Calcd for  $\text{C}_{38}\text{H}_{25}\text{Cl}_2\text{NaO}_2\text{P}^+$ : 637.0861, Found: 637.0856.

**(8-(3,5-dimethylphenyl)-10,12-dimethyldinaphtho[2,1-b:2',3'-d]furan-13a(13H)-yl)diphenylphosphine oxide (3h)**

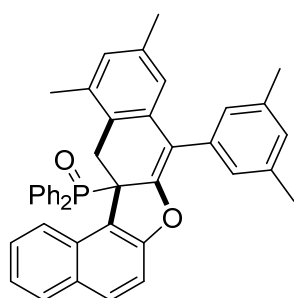

A white solid, (60 mg, 50% yield).  **$^1\text{H}$  NMR** (500 MHz,  $\text{CDCl}_3$ )  $\delta$  8.61 (d,  $J = 5.0$  Hz, 1H), 7.63–7.55 (m, 6H), 7.52 (d,  $J = 10.0$  Hz, 1H), 7.29–7.26 (m, 1H), 7.18–7.15 (m, 1H), 7.09–7.04 (m, 7H), 7.00–6.96 (m, 2H), 6.75 (s, 1H), 5.83 (s, 1H), 4.92–4.87 (m, 1H), 3.38–3.28 (m, 1H), 2.61 (s, 3H), 2.42 (s, 6H), 1.97 (s, 3H).  **$^{13}\text{C}$  NMR** (126 MHz,  $\text{CDCl}_3$ )  $\delta$  157.33 (d,  $J = 5.0$  Hz), 153.39 (d,  $J = 6.3$  Hz), 137.74, 136.74 (d,  $J = 3.8$  Hz), 135.76 (d,  $J = 65.5$  Hz), 135.28 (d,  $J = 5.0$  Hz), 131.48 (d,  $J = 95.8$  Hz), 131.01 (d,  $J = 2.5$  Hz), 130.84 (d,  $J = 8.8$  Hz), 130.53, 130.34, 130.01 (d,  $J = 8.8$  Hz), 129.89 (d,  $J = 3.8$  Hz), 129.47 (d,  $J = 44.1$  Hz), 128.52, 127.90, 127.46, 127.34 (d,  $J = 6.3$  Hz), 127.17 (d,  $J = 11.3$  Hz), 126.06 (d,  $J = 3.8$  Hz), 125.09, 124.74, 124.00, 120.95, 116.67 (d,  $J = 11.3$  Hz), 111.61 (d,  $J = 2.5$  Hz), 55.79 (d,  $J = 55.4$  Hz), 31.40, 21.63, 20.87, 20.31.  **$^{31}\text{P}$  NMR** (202 MHz,  $\text{CDCl}_3$ )  $\delta$  31.11. **HRMS (ESI):** ( $[\text{M}+\text{Na}]^+$ ) Calcd for  $\text{C}_{42}\text{H}_{35}\text{NaO}_2\text{P}^+$ : 625.2267, Found: 625.2259.

**(8-(4-chlorophenyl)dinaphtho[2,1-b:2',3'-d]furan-13a(13H)-yl)diphenylphosphine oxide (3i-1)**

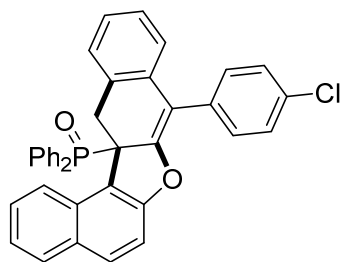

A white solid, (38 mg, 33% yield).  $^1\text{H NMR}$  (500 MHz,  $\text{CDCl}_3$ )  $\delta$  8.51 (d,  $J = 10.0$  Hz, 1H), 7.62–7.51 (m, 7H), 7.46–7.38 (m, 5H), 7.30–7.27 (m, 1H), 7.14–7.11 (m, 1H), 7.07–7.02 (m, 5H), 6.97–6.95 (m, 2H), 7.78–6.75 (m, 1H), 6.23 (d,  $J = 10.0$  Hz, 1H), 4.79–4.74 (m, 1H), 3.70–3.61 (m, 1H).  $^{13}\text{C NMR}$  (126 MHz,  $\text{CDCl}_3$ )  $\delta$  157.01 (d,  $J = 6.3$  Hz), 154.21 (d,  $J = 6.3$  Hz), 135.79, 133.32, 131.47, 131.16, 130.75, 130.42, 130.08 (d,  $J = 8.8$  Hz), 128.68, 128.57, 128.47, 127.49, 127.40, 127.32, 127.23, 126.85, 125.49, 125.05, 124.21, 120.84, 115.36 (d,  $J = 11.3$  Hz), 111.28, 55.61 (d,  $J = 55.4$  Hz), 35.69.  $^{31}\text{P NMR}$  (202 MHz,  $\text{CDCl}_3$ )  $\delta$  30.47. **HRMS (ESI):** ( $[\text{M}+\text{Na}]^+$ ) Calcd for  $\text{C}_{38}\text{H}_{26}\text{ClNaO}_2\text{P}^+$ : 603.1251, Found: 603.1241.

**(11-chloro-8-phenyldinaphtho[2,1-b:2',3'-d]furan-13a(13H)-yl)diphenylphosphine oxide (3i-2)**

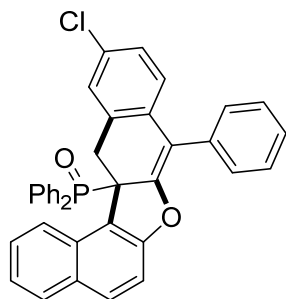

A white solid, (30 mg, 26% yield).  $^1\text{H NMR}$  (500 MHz,  $\text{CDCl}_3$ )  $\delta$  8.52 (d,  $J = 10.0$  Hz, 1H), 7.72–7.68 (m, 2H), 7.62–7.45 (m, 9H), 7.41–7.38 (m, 1H), 7.37 (s, 1H), 7.31–7.28 (m, 1H), 7.17–7.14 (m, 1H), 7.12–7.07 (m, 3H), 7.02–6.97 (m, 3H), 6.71 (d,  $J = 5.0$  Hz, 1H), 6.20 (d,  $J = 10.0$  Hz, 1H), 4.75–4.70 (m, 1H), 3.68–3.59 (m, 1H).  $^{13}\text{C NMR}$  (126 MHz,  $\text{CDCl}_3$ )  $\delta$  157.08, 154.01, 134.66 (d,  $J = 47.9$  Hz), 132.73, 131.93, 131.41, 131.34, 131.05, 130.81 (d,  $J = 2.5$  Hz), 130.40, 130.11, 130.04, 128.55, 128.34, 127.83, 127.44 (d,  $J = 32.8$  Hz), 127.43, 127.41 (d,  $J = 17.6$  Hz), 126.79, 125.05, 124.21, 120.52, 115.76 (d,  $J = 11.3$  Hz), 111.35 (d,  $J = 2.5$  Hz), 55.51 (d,  $J = 55.4$  Hz), 35.46.  $^{31}\text{P NMR}$  (202 MHz,  $\text{CDCl}_3$ )  $\delta$  30.24. **HRMS (ESI):** ( $[\text{M}+\text{Na}]^+$ ) Calcd for  $\text{C}_{38}\text{H}_{26}\text{ClNaO}_2\text{P}^+$ : 603.1251, Found: 603.1242.

**(8-ethylidnaptho[2,1-b:2',3'-d]furan-13a(13H)-yl)diphenylphosphine oxide (3j)**

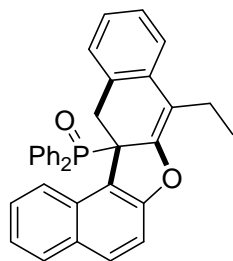

A white solid, (32 mg, 32% yield). **<sup>1</sup>H NMR** (500 MHz, CDCl<sub>3</sub>) δ 8.52 (d, *J* = 5.0 Hz, 1H), 7.62–7.58 (m, 3H), 7.55–7.51 (m, 4H), 7.30–7.27 (m, 2H), 7.18–7.15 (m, 1H), 7.09–7.03 (m, 4H), 7.01–6.98 (m, 1H), 6.96–6.93 (m, 2H), 6.86–6.83 (m, 1H), 6.58 (d, *J* = 5.0 Hz, 1H), 4.73–4.68 (m, 1H), 3.61–3.51 (m, 1H), 2.70–2.57 (m, 2H), 1.19 (t, *J* = 7.5 Hz, 3H). **<sup>13</sup>C NMR** (126 MHz, CDCl<sub>3</sub>) δ 157.08 (d, *J* = 5.0 Hz), 152.83 (d, *J* = 5.0 Hz), 135.43 (d, *J* = 5.0 Hz), 131.53 (d, *J* = 7.6 Hz), 131.03, 130.69, 130.60, 130.18 (d, *J* = 8.8 Hz), 130.09 (d, *J* = 88.2 Hz), 128.50, 128.35, 127.34 (d, *J* = 11.3 Hz), 127.30 (d, *J* = 13.9 Hz), 127.12, 127.03, 126.17, 125.23, 123.98, 122.68, 121.17 (d, *J* = 3.8 Hz), 115.65 (d, *J* = 11.4 Hz), 111.21 (d, *J* = 2.5 Hz), 54.57 (d, *J* = 56.7 Hz), 35.75, 19.09 (d, *J* = 2.5 Hz), 13.48 (d, *J* = 6.3 Hz). **<sup>31</sup>P NMR** (202 MHz, CDCl<sub>3</sub>) δ 30.22. **HRMS (ESI):** ([M+H]<sup>+</sup>) Calcd for C<sub>34</sub>H<sub>28</sub>O<sub>2</sub>P<sup>+</sup>: 499.1821, Found: 499.1815.

**(3-bromo-8-phenyldinaphtho[2,1-b:2',3'-d]furan-13a(13H)-yl)diphenylphosphine oxide (3k)**

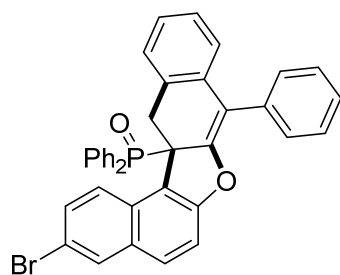

A white solid, (30 mg, 24% yield). **<sup>1</sup>H NMR** (400 MHz, CDCl<sub>3</sub>) δ 8.51 (d, *J* = 8.0 Hz, 1H), 7.78 (s, 1H), 7.74–7.64 (m, 5H), 7.53–7.52 (m, 4H), 7.44–7.38 (m, 3H), 7.14–7.04 (m, 8H), 6.80–6.77 (m, 1H), 6.33 (d, *J* = 8.0 Hz, 1H), 4.78–4.72 (m, 1H), 3.75–3.63 (m, 1H). **<sup>13</sup>C NMR** (101 MHz, CDCl<sub>3</sub>) δ 157.35 (d, *J* = 6.1 Hz), 153.22 (d, *J* = 6.1 Hz), 135.98 (d, *J* = 4.0 Hz), 134.69 (d, *J* = 4.0 Hz), 131.41, 131.23, 131.15, 130.83 (d, *J* = 3.0 Hz), 130.48, 130.43, 130.05, 129.96, 129.64 (d, *J* = 3.0 Hz), 128.88 (d, *J* = 3.0 Hz), 128.42, 128.24, 127.68, 127.58 (d, *J* = 11.1 Hz), 127.37, 127.26 (d, *J* = 12.1 Hz), 126.80

(d,  $J = 17.2$  Hz), 125.79, 121.29 (d,  $J = 4.0$  Hz), 117.86, 116.77 (d,  $J = 11.1$  Hz), 112.44 (d,  $J = 2.0$  Hz), 55.37 (d,  $J = 55.6$  Hz), 35.61.  $^{31}\text{P}$  NMR (162 MHz,  $\text{CDCl}_3$ )  $\delta$  29.62. **HRMS (ESI):** ( $[\text{M}+\text{Na}]^+$ ) Calcd for  $\text{C}_{38}\text{H}_{26}\text{BrNaO}_2\text{P}^+$ : 647.0746, Found: 647.0742.

**diphenyl(8-phenylnaphtho[2',3':4,5]furo[3,2-f]quinolin-13a(13H)-yl)phosphine oxide (3l)**

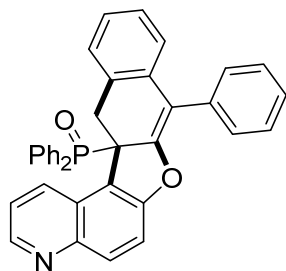

A white solid, (47 mg, 43% yield).  $^1\text{H}$  NMR (400 MHz,  $\text{CDCl}_3$ )  $\delta$  8.96 (d,  $J = 8.0$  Hz, 1H), 8.76 (d,  $J = 4.0$  Hz, 1H), 7.81 (d,  $J = 8.0$  Hz, 1H), 7.73–7.68 (m, 2H), 7.65–7.60 (m, 2H), 7.51–7.43 (m, 6H), 7.35 (d,  $J = 8.0$  Hz, 1H), 7.24 (d,  $J = 8.0$  Hz, 1H), 7.16–7.03 (m, 7H), 6.79–6.76 (m, 1H), 6.34 (d,  $J = 4.0$  Hz, 1H), 4.74–4.68 (m, 1H), 3.78–3.66 (m, 1H).  $^{13}\text{C}$  NMR (101 MHz,  $\text{CDCl}_3$ )  $\delta$  157.07 (d,  $J = 5.1$  Hz), 153.19 (d,  $J = 5.1$  Hz), 148.55, 145.25, 135.89 (d,  $J = 5.1$  Hz), 134.57 (d,  $J = 4.0$  Hz), 133.36, 132.02, 131.45, 131.18 (d,  $J = 9.1$  Hz), 130.60 (d,  $J = 63.6$  Hz), 129.99 (d,  $J = 4.0$  Hz), 129.88, 128.42, 128.16, 127.72 (d,  $J = 3.0$  Hz), 127.41 (d,  $J = 36.4$  Hz), 127.35, 126.76, 125.87, 125.78, 121.80, 120.87 (d,  $J = 4.0$  Hz), 117.02 (d,  $J = 11.1$  Hz), 114.58, 55.49 (d,  $J = 56.6$  Hz), 35.62.  $^{31}\text{P}$  NMR (162 MHz,  $\text{CDCl}_3$ )  $\delta$  28.08. **HRMS (ESI):** ( $[\text{M}+\text{H}]^+$ ) Calcd for  $\text{C}_{37}\text{H}_{27}\text{NO}_2\text{P}^+$ : 548.1774, Found: 548.1774.

**diphenyl(6-phenylnaphtho[2,3-b]benzofuran-11a(11H)-yl)phosphine oxide (5a)**

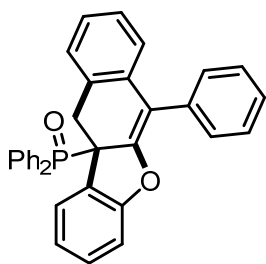

A white solid, (87 mg, 76% yield).  $^1\text{H}$  NMR (500 MHz,  $\text{CDCl}_3$ )  $\delta$  7.78–7.73 (m, 4H), 7.52–7.47 (m, 5H), 7.39–7.38 (m, 1H), 7.30–7.28 (m, 1H), 7.24–7.21 (m, 2H), 7.13–7.10



(m, 2H), 7.04-6.99 (m, 3H), 6.91-6.86 (m, 2H). 6.75-6.72 (m, 1H), 6.65 (d,  $J = 10.0$  Hz, 1H), 6.46 (d,  $J = 6.0$  Hz, 1H), 4.29-4.24 (m, 1H), 3.59-3.49 (m, 1H).  $^{13}\text{C}$  NMR (126 MHz,  $\text{CDCl}_3$ )  $\delta$  159.20 (d,  $J = 5.0$  Hz), 152.99 (d,  $J = 5.0$  Hz), 136.31 (d,  $J = 3.8$  Hz), 134.92, 131.61 (d,  $J = 8.8$  Hz), 131.52, 131.15 (d,  $J = 3.8$  Hz), 130.89 (d,  $J = 3.8$  Hz), 130.72, 130.65, 130.16, 130.04 (d,  $J = 89.5$  Hz), 129.35, 128.49, 128.08, 127.96, 127.86, 127.69, 127.49 (d,  $J = 12.6$  Hz), 127.17, 126.63, 126.08, 125.53 (d,  $J = 3.8$  Hz), 122.77, 116.44 (d,  $J = 10.1$  Hz), 110.08, 53.28 (d,  $J = 58.0$  Hz), 34.97.  $^{31}\text{P}$  NMR (202 MHz,  $\text{CDCl}_3$ )  $\delta$  27.13 (s). **HRMS (ESI):** ( $[\text{M}+\text{H}]^+$ ) Calcd for  $\text{C}_{34}\text{H}_{26}\text{O}_2\text{P}^+$ : 497.1665, Found: 497.1657.

**(9-methyl-6-(p-tolyl)naphtho[2,3-b]benzofuran-11a(11H)-yl)diphenylphosphine oxide (5b)**

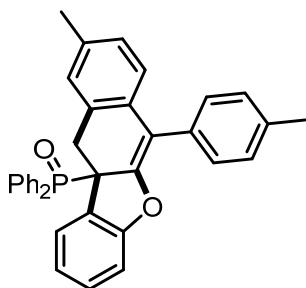

A white solid, (67 mg, 64% yield).  $^1\text{H}$  NMR (500 MHz,  $\text{CDCl}_3$ )  $\delta$  7.78-7.72 (m, 4H), 7.51 (d,  $J = 10.0$  Hz, 1H), 7.37 (d,  $J = 10.0$  Hz, 2H), 7.31-7.28 (m, 3H), 7.25-7.21 (m, 2H), 7.13-7.10 (m, 1H), 7.04-6.99 (m, 3H), 6.90 (s, 1H), 6.89-6.86 (m, 1H), 6.64 (d,  $J = 10.0$  Hz, 1H), 6.54 (d,  $J = 10.0$  Hz, 1H), 6.38 (d,  $J = 10.0$  Hz, 1H), 4.19-4.14 (m, 1H), 3.55-3.46 (m, 1H), 2.43 (s, 3H), 2.19 (s, 3H).  $^{13}\text{C}$  NMR (126 MHz,  $\text{CDCl}_3$ )  $\delta$  159.33 (d,  $J = 3.8$  Hz), 151.93 (d,  $J = 5.0$  Hz), 137.36, 136.22, 133.59 (d,  $J = 5.0$  Hz), 132.02 (d,  $J = 3.8$  Hz), 131.65 (d,  $J = 8.8$  Hz), 131.49, 131.01 (d,  $J = 2.5$  Hz), 130.74, 130.68, 129.98 (d,  $J = 3.8$  Hz), 129.18, 128.99, 127.87 (d,  $J = 11.3$  Hz), 127.69, 127.30 (d,  $J = 11.3$  Hz), 126.08, 125.63 (d,  $J = 3.8$  Hz), 122.59 (d,  $J = 2.5$  Hz), 116.35 (d,  $J = 11.3$  Hz), 110.02, 53.33 (d,  $J = 59.2$  Hz), 35.08, 21.50, 21.01.  $^{31}\text{P}$  NMR (202 MHz,  $\text{CDCl}_3$ )  $\delta$  26.87 (s). **HRMS (ESI):** ( $[\text{M}+\text{Na}]^+$ ) Calcd for  $\text{C}_{36}\text{H}_{29}\text{NaO}_2\text{P}^+$ : 547.1797, Found: 547.1793.

**(9-methoxy-6-(4-methoxyphenyl)naphtho[2,3-b]benzofuran-11a(11H)-yl)diphenylphosphine oxide (5c)**

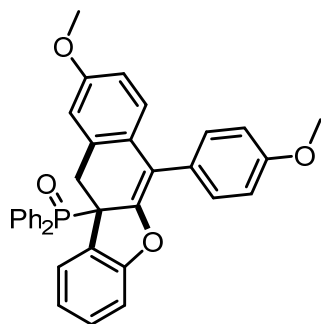

A white solid, (68 mg, 61% yield). **<sup>1</sup>H NMR** (400 MHz, CDCl<sub>3</sub>) δ 7.81-7.76 (m, 4H), 7.52 (d, *J* = 8.0 Hz, 1H), 7.42 (d, *J* = 8.0 Hz, 2H), 7.35-7.31 (m, 1H), 7.28-7.23 (m, 2H), 7.17-7.14 (m, 1H), 7.10-7.01 (m, 5H), 6.92-6.88 (m, 1H), 6.69-6.65 (m, 2H), 6.45 (d, *J* = 8.0 Hz, 1H), 6.31 (d, *J* = 8.0 Hz, 1H), 4.21-4.14 (m, 1H), 3.90 (s, 3H), 3.75 (s, 3H), 3.60-3.47 (m, 1H). **<sup>13</sup>C NMR** (101 MHz, CDCl<sub>3</sub>) δ 159.29 (d, *J* = 4.0 Hz), 158.94, 158.24, 150.53 (d, *J* = 6.1 Hz), 132.64 (d, *J* = 4.0 Hz), 131.54 (d, *J* = 8.1 Hz), 131.39 (d, *J* = 2.0 Hz), 131.13, 130.68, 130.57, 130.28 (d, *J* = 89.9 Hz), 129.20, 127.78 (d, *J* = 11.1 Hz), 127.29 (d, *J* = 12.1 Hz), 127.14, 125.52 (d, *J* = 4.0 Hz), 122.44 (d, *J* = 2.0 Hz), 115.84 (d, *J* = 11.1 Hz), 113.90, 113.82, 112.41, 109.89, 55.36, 55.32, 53.11 (d, *J* = 59.6 Hz), 35.29. **<sup>31</sup>P NMR** (162 MHz, CDCl<sub>3</sub>) δ 28.38 (s). **HRMS (ESI):** ([M+Na]<sup>+</sup>) Calcd for C<sub>36</sub>H<sub>29</sub>NaO<sub>4</sub>P<sup>+</sup>: 579.1696, Found: 579.1696.

**(9-(tert-butyl)-6-(4-(tert-butyl)phenyl)naphtho[2,3-b]benzofuran-11a(11H)-yl)diphenylphosphine oxide (5d)**

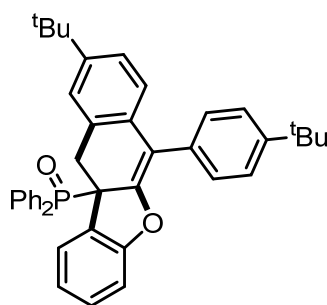

A white solid, (88 mg, 72% yield). **<sup>1</sup>H NMR** (500 MHz, CDCl<sub>3</sub>) δ 7.77-7.72 (m, 4H), 7.55 (d, *J* = 10.0 Hz, 1H), 7.50 (d, *J* = 10.0 Hz, 2H), 7.45 (d, *J* = 5.0 Hz, 2H), 7.31-7.28 (m, 1H), 7.23-7.20 (m, 2H), 7.12 (s, 1H), 7.10-7.07 (m, 1H), 7.02-6.98 (m, 3H), 6.90-6.87 (m, 1H), 6.76 (d, *J* = 10.0 Hz, 1H), 6.63 (d, *J* = 5.0 Hz, 1H), 6.50 (d, *J* = 10.0 Hz, 1H), 4.23-4.18 (m, 1H), 3.58-3.48 (m, 1H), 1.40 (s, 9H), 1.24 (s, 9H). **<sup>13</sup>C NMR** (126 MHz, CDCl<sub>3</sub>) δ 159.32 (d, *J* = 3.8 Hz), 152.16 (d, *J* = 6.3 Hz), 150.39, 149.33, 133.56 (d, *J* = 5.0 Hz), 131.88 (d, *J* = 3.8 Hz), 131.62 (d, *J* = 8.8 Hz), 131.41 (d, *J* = 2.5 Hz),

130.92, 130.66 (d,  $J = 8.8$  Hz), 129.77 (d,  $J = 3.8$  Hz), 129.23 (d,  $J = 2.5$  Hz), 127.82 (d,  $J = 11.3$  Hz), 127.45 (d,  $J = 11.3$  Hz), 126.02, 125.66 (d,  $J = 3.8$  Hz), 125.32, 125.24, 123.88, 122.59 (d,  $J = 3.8$  Hz), 116.28 (d,  $J = 11.3$  Hz), 110.03, 53.54 (d,  $J = 59.2$  Hz), 35.29, 34.79, 34.45, 31.52, 31.36.  $^{31}\text{P}$  NMR (202 MHz,  $\text{CDCl}_3$ )  $\delta$  26.11 (s). **HRMS (ESI):** ( $[\text{M}+\text{Na}]^+$ ) Calcd for  $\text{C}_{42}\text{H}_{41}\text{NaO}_2\text{P}^+$ : 631.2736, Found: 631.2730.

**(9-(methylthio)-6-(4-(methylthio)phenyl)naphtho[2,3-b]benzofuran-11a(11H)-yl)diphenylphosphine oxide (5e)**

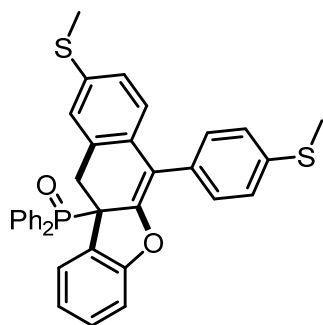

A white solid, (72 mg, 61% yield).  $^1\text{H}$  NMR (500 MHz,  $\text{CDCl}_3$ )  $\delta$  7.75-7.70 (m, 4H), 7.49 (d,  $J = 5.0$  Hz, 1H), 7.38-7.28 (m, 5H), 7.25-7.20 (m, 2H), 7.15-7.12 (m, 1H), 7.06-6.98 (m, 4H), 6.89-6.86 (m, 1H), 6.65-6.61 (m, 2H), 6.38 (d,  $J = 10.0$  Hz, 1H), 4.19-4.14 (m, 1H), 3.53-3.43 (m, 1H), 2.53 (s, 3H), 2.42 (s, 3H).  $^{13}\text{C}$  NMR (126 MHz,  $\text{CDCl}_3$ )  $\delta$  159.16 (d,  $J = 3.8$  Hz), 152.44 (d,  $J = 5.0$  Hz), 138.02, 136.52, 133.31 (d,  $J = 3.8$  Hz), 131.78 (d,  $J = 3.8$  Hz), 131.66, 131.59, 131.27, 130.65 (d,  $J = 8.8$  Hz), 130.45, 129.65, 129.41, 127.93 (d,  $J = 12.6$  Hz), 127.70 (d,  $J = 3.8$  Hz), 127.47 (d,  $J = 12.6$  Hz), 126.33, 125.65, 122.80, 115.62 (d,  $J = 11.3$  Hz), 110.04, 53.35 (d,  $J = 58.0$  Hz), 35.01, 16.11, 15.76.  $^{31}\text{P}$  NMR (202 MHz,  $\text{CDCl}_3$ )  $\delta$  26.79 (s). **HRMS (ESI):** ( $[\text{M}+\text{Na}]^+$ ) Calcd for  $\text{C}_{36}\text{H}_{29}\text{NaO}_2\text{PS}_2^+$ : 611.1239, Found: 611.1238.

**(9-fluoro-6-(4-fluorophenyl)naphtho[2,3-b]benzofuran-11a(11H)-yl)diphenylphosphine oxide (5f)**

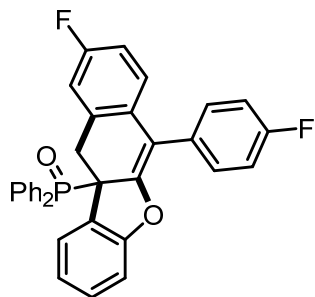

A white solid, (56 mg, 53% yield). **<sup>1</sup>H NMR** (400 MHz, CDCl<sub>3</sub>) δ 7.80-7.74 (m, 4H), 7.50 (d, *J* = 8.0 Hz, 1H), 7.45-7.41 (m, 2H), 7.36-7.33 (m, 1H), 7.28-7.24 (m, 2H), 7.21-7.17 (m, 3H), 7.14-7.09 (m, 2H), 7.07-7.03 (m, 1H), 6.93-6.89 (m, 1H), 6.86 (d *J* = 8.0 Hz, 1H), 6.68 (d *J* = 8.0 Hz, 1H), 6.49-6.40 (m, 2H), 4.26-4.19 (m, 1H), 3.58-3.46 (m, 1H). **<sup>13</sup>C NMR** (126 MHz, CDCl<sub>3</sub>) δ 162.16 (d, *J* = 248.5 Hz), 161.33 (d, *J* = 248.5 Hz), 158.99 (d, *J* = 4.0 Hz), 152.55, 133.35 (d, *J* = 8.1 Hz), 132.24, 131.56, 131.48, 131.36 (d, *J* = 3.0 Hz), 130.60, 130.52, 129.43, 127.88 (d, *J* = 11.1 Hz), 127.49 (d, *J* = 11.1 Hz), 127.17 (d, *J* = 9.1 Hz), 125.47 (d, *J* = 3.0 Hz), 122.83 (d, *J* = 3.0 Hz), 115.52 (d, *J* = 21.2 Hz), 115.15, 114.70 (d, *J* = 11.1 Hz), 113.58 (d, *J* = 21.2 Hz), 109.97 (d, *J* = 2.0 Hz), 53.06 (d, *J* = 58.6 Hz), 34.83. **<sup>31</sup>P NMR** (162 MHz, CDCl<sub>3</sub>) δ 27.89 (s). **<sup>19</sup>F NMR** (376 MHz, CDCl<sub>3</sub>) δ -113.76 (s), -115.67 (s). **HRMS (ESI):** ([M+Na]<sup>+</sup>) Calcd for C<sub>34</sub>H<sub>23</sub>F<sub>2</sub>NaO<sub>2</sub>P<sup>+</sup>: 555.1296, Found: 555.1295.

**(9-chloro-6-(4-chlorophenyl)naphtho[2,3-b]benzofuran-11a(11H)-yl)diphenylphosphine oxide (5g)**

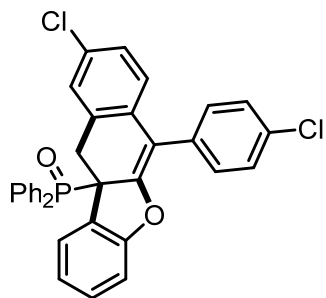

A white solid, (77 mg, 68% yield). **<sup>1</sup>H NMR** (500 MHz, CDCl<sub>3</sub>) δ 7.74-7.69 (m, 4H), 7.46-7.42 (m, 3H), 7.35 (d, *J* = 10.0 Hz, 2H), 7.33-7.30 (m, 1H), 7.25-7.21 (m, 2H), 7.19-7.16 (m, 1H), 7.10-7.07 (m, 3H), 7.04-7.01 (m, 1H), 6.90-6.87 (m, 1H), 6.70 (dd, *J* = 5.0, 10.0 Hz, 1H), 6.66 (d, *J* = 10.0 Hz, 1H), 6.34 (d, *J* = 10.0 Hz, 1H), 4.21-4.15 (m, 1H), 3.51-3.41 (m, 1H). **<sup>13</sup>C NMR** (126 MHz, CDCl<sub>3</sub>) δ 158.97 (d, *J* = 5.0 Hz), 153.67 (d, *J* = 6.3 Hz), 134.51 (d, *J* = 3.8 Hz), 133.59, 132.88, 132.07, 131.63 (d, *J* = 8.8 Hz), 131.62 (d, *J* = 27.7 Hz), 131.31 (d, *J* = 3.8 Hz), 130.64 (d, *J* = 8.8 Hz), 129.58, 128.86, 128.22, 128.01 (d, *J* = 11.3 Hz), 127.59 (d, *J* = 11.3 Hz), 127.21, 126.90, 125.56 (d, *J* = 3.8 Hz), 123.05 (d, *J* = 2.5 Hz), 114.54 (d, *J* = 10.1 Hz), 110.10, 53.31 (d, *J* = 58.0 Hz), 34.68. **<sup>31</sup>P NMR** (202 MHz, CDCl<sub>3</sub>) δ 26.99 (s). **HRMS (ESI):** ([M+Na]<sup>+</sup>) Calcd for C<sub>34</sub>H<sub>23</sub>Cl<sub>2</sub>NaO<sub>2</sub>P<sup>+</sup>: 587.0705, Found: 587.0701.

**(6-(3,5-dimethylphenyl)-8,10-dimethylnaphtho[2,3-b]benzofuran-11a(11H)-**

**yl)diphenylphosphine oxide (5h)**

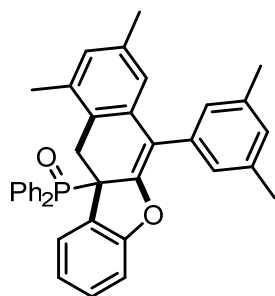

A white solid, (66 mg, 60% yield). **<sup>1</sup>H NMR** (500 MHz, CDCl<sub>3</sub>) δ 7.77-7.74 (m, 2H), 7.67-7.63 (m, 2H), 7.50 (d, *J* = 5.0 Hz, 1H), 7.31-7.28 (m, 1H), 7.25-7.21 (m, 2H), 7.16-7.13 (m, 1H), 7.04-6.98 (m, 6H), 6.86-6.83 (m, 1H), 6.69 (d, *J* = 10.0 Hz, 1H), 6.57 (s, 1H), 6.01 (s, 1H), 4.40-4.35 (m, 1H), 3.22-3.12 (m, 1H), 2.40 (s, 6H), 2.38 (s, 3H), 1.95 (s, 3H). **<sup>13</sup>C NMR** (126 MHz, CDCl<sub>3</sub>) δ 159.26, 152.59, 137.77, 136.80, 135.85, 135.24, 135.05, 131.38, 131.03 (d, *J* = 8.8 Hz), 130.57 (d, *J* = 8.8 Hz), 130.19 (d, *J* = 2.5 Hz), 129.55, 129.32, 129.17, 127.93, 127.83, 127.32 (d, *J* = 12.6 Hz), 125.47 (d, *J* = 3.8 Hz), 125.06, 122.61, 116.57, 110.18, 53.43 (d, *J* = 59.2 Hz), 30.86, 21.62, 20.82, 20.16. **<sup>31</sup>P NMR** (202 MHz, CDCl<sub>3</sub>) δ 27.73 (s). **HRMS (ESI):** ([M+Na]<sup>+</sup>) Calcd for C<sub>38</sub>H<sub>33</sub>NaO<sub>2</sub>P<sup>+</sup>: 575.2110, Found: 575.2106.

**(2-methyl-6-phenylnaphtho[2,3-b]benzofuran-11a(11H)-yl)diphenylphosphine oxide (5i)**

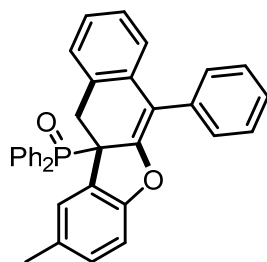

A white solid, (74 mg, 73% yield) **<sup>1</sup>H NMR** (400 MHz, CDCl<sub>3</sub>) δ 7.83-7.75 (m, 4H), 7.51-7.50 (m, 4H), 7.43-7.39 (m, 1H), 7.35 (s, 1H), 7.33-7.25 (m, 3H), 7.17-7.12 (m, 2H), 7.08-7.04 (m, 2H), 6.94-6.91 (m, 1H), 6.83 (d, *J* = 8.0 Hz, 1H), 6.78-6.75 (m, 1H), 6.58 (d, *J* = 8.0 Hz, 1H), 6.50 (d, *J* = 4.0 Hz, 1H), 4.32-4.25 (m, 1H), 3.62-3.49 (m, 1H), 2.25 (s, 3H). **<sup>13</sup>C NMR** (101 MHz, CDCl<sub>3</sub>) δ 157.14 (d, *J* = 4.0 Hz), 153.35 (d, *J* = 5.0 Hz), 136.34 (d, *J* = 4.0 Hz), 134.97 (d, *J* = 4.0 Hz), 132.21 (d, *J* = 3.0 Hz), 131.58, 131.50, 131.19 (dd, *J* = 39.4, 2.0 Hz), 130.64 (d, *J* = 9.1 Hz), 130.10 (d, *J* = 3.0 Hz), 129.64, 128.39, 127.98, 127.82, 127.71, 127.48 (d, *J* = 12.1 Hz), 127.30, 127.06, 126.43,

125.93, 116.09 (d,  $J = 10.1$  Hz), 109.57, 53.23 (d,  $J = 58.6$  Hz), 35.00, 20.89.  $^{31}\text{P}$  NMR (162 MHz,  $\text{CDCl}_3$ )  $\delta$  26.69 (s). **HRMS (ESI):** ( $[\text{M}+\text{Na}]^+$ ) Calcd for  $\text{C}_{35}\text{H}_{27}\text{NaO}_2\text{P}^+$ : 533.1641, Found: 533.1639.

**(2-methoxy-6-phenylnaphtho[2,3-b]benzofuran-11a(11H)-yl)diphenylphosphine oxide (5j)**

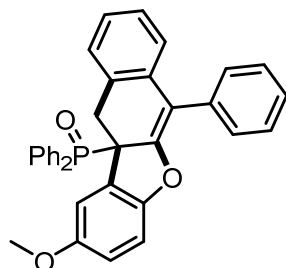

A white solid, (59 mg, 56% yield).  $^1\text{H}$  NMR (400 MHz,  $\text{CDCl}_3$ )  $\delta$  7.84-7.73 (m, 4H), 7.52-7.49 (m, 4H), 7.43-7.39 (m, 1H), 7.36-7.32 (m, 1H), 7.29-7.26 (m, 2H), 7.17-7.12 (m, 2H), 7.09-7.04 (m, 3H), 6.95-6.91 (m, 1H), 6.78-6.74 (m, 1H), 6.61-6.56 (m, 2H), 6.47 (d,  $J = 8.0$  Hz, 1H), 4.29-4.23 (m, 1H), 3.74 (s, 3H), 3.63-3.50 (m, 1H).  $^{13}\text{C}$  NMR (101 MHz,  $\text{CDCl}_3$ )  $\delta$  155.57 (d,  $J = 3.0$  Hz), 153.47 (d,  $J = 6.1$  Hz), 153.16 (d,  $J = 5.1$  Hz), 136.32 (d,  $J = 5.1$  Hz), 134.91 (d,  $J = 4.0$  Hz), 131.52, 131.44, 131.03 (d,  $J = 3.0$  Hz), 130.63, 130.54, 130.06 (d,  $J = 3.0$  Hz), 128.37, 127.95, 127.83 (d,  $J = 11.1$  Hz), 127.53, 127.38 (d,  $J = 12.1$  Hz), 127.10, 126.42, 125.91 (d,  $J = 2.0$  Hz), 116.05 (d,  $J = 11.1$  Hz), 115.48 (d,  $J = 3.0$  Hz), 110.40 (d,  $J = 3.0$  Hz), 56.11, 53.77 (d,  $J = 58.6$  Hz), 34.95.  $^{31}\text{P}$  NMR (162 MHz,  $\text{CDCl}_3$ )  $\delta$  26.91 (s). **HRMS (ESI):** ( $[\text{M}+\text{Na}]^+$ ) Calcd for  $\text{C}_{35}\text{H}_{27}\text{NaO}_3\text{P}^+$ : 549.1590, Found: 549.1592.

**(2-fluoro-6-phenylnaphtho[2,3-b]benzofuran-11a(11H)-yl)diphenylphosphine oxide (5k)**

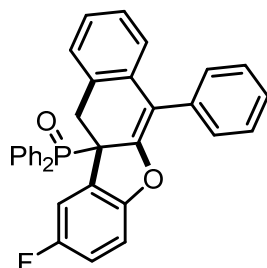

A white solid, (67 mg, 65% yield).  $^1\text{H}$  NMR (500 MHz,  $\text{CDCl}_3$ )  $\delta$  7.81-7.72 (m, 4H), 7.49-7.44 (m, 4H), 7.40-7.37 (m, 1H), 7.34-7.31 (m, 1H), 7.28-7.21 (m, 3H), 7.13-7.09

(m, 2H), 7.04-7.01 (m, 2H), 6.90-6.87 (m, 1H), 6.74-6.67 (m, 2H), 6.57-6.55 (m, 1H), 6.45 (d,  $J = 10.0$  Hz, 1H), 4.23-4.18 (m, 1H), 3.57-3.48 (m, 1H).  $^{13}\text{C}$  NMR (126 MHz,  $\text{CDCl}_3$ )  $\delta$  158.55 (d,  $J = 240.7$  Hz), 154.08 (d,  $J = 254.5$  Hz), 136.08 (d,  $J = 5.0$  Hz), 134.72 (d,  $J = 3.8$  Hz), 131.70 (d,  $J = 3.8$  Hz), 131.59 (d,  $J = 8.8$  Hz), 130.77 (d,  $J = 98.3$  Hz), 130.67 (d,  $J = 8.8$  Hz), 130.09, 129.37, 128.51, 128.08, 127.88 (d,  $J = 25.2$  Hz), 127.54 (d,  $J = 12.6$  Hz), 127.25, 126.74, 126.15, 116.66 (d,  $J = 10.1$  Hz), 115.72 (d,  $J = 23.9$  Hz), 112.82 (d,  $J = 29.0$  Hz), 110.51 (d,  $J = 8.8$  Hz), 53.79 (d,  $J = 56.7$  Hz), 34.77.  $^{31}\text{P}$  NMR (202 MHz,  $\text{CDCl}_3$ )  $\delta$  26.78 (s).  $^{19}\text{F}$  NMR (471 MHz,  $\text{CDCl}_3$ )  $\delta$  -120.12 (s). **HRMS (ESI):** ( $[\text{M}+\text{Na}]^+$ ) Calcd for  $\text{C}_{34}\text{H}_{24}\text{FNaO}_2\text{P}^+$ : 537.1390, Found: 537.1388.

**(2-chloro-6-phenylnaphtho[2,3-b]benzofuran-11a(11H)-yl)diphenylphosphine oxide (5l)**

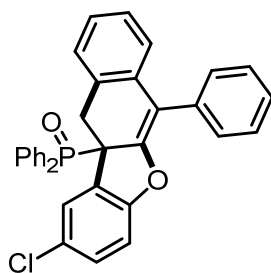

A white solid, (64 mg, 60% yield).  $^1\text{H}$  NMR (400 MHz,  $\text{CDCl}_3$ )  $\delta$  7.84-7.76 (m, 4H), 7.53-7.47 (m, 5H), 7.44-7.41 (m, 1H), 7.39-7.35 (m, 1H), 7.32-7.28 (m, 2H), 7.18-7.12 (m, 2H), 7.09-7.05 (m, 2H), 6.99 (d,  $J = 8.0$  Hz, 1H), 6.95-6.91 (m, 1H), 6.79-6.76 (m, 1H), 6.58 (d,  $J = 8.0$  Hz, 1H), 6.50 (d,  $J = 8.0$  Hz, 1H), 4.27-4.20 (m, 1H), 3.62-3.49 (m, 1H).  $^{13}\text{C}$  NMR (101 MHz,  $\text{CDCl}_3$ )  $\delta$  157.64 (d,  $J = 4.0$  Hz), 152.57 (d,  $J = 6.1$  Hz), 135.89 (d,  $J = 4.0$  Hz), 134.53 (d,  $J = 4.0$  Hz), 131.68 (d,  $J = 3.0$  Hz), 131.56 (d,  $J = 9.1$  Hz), 131.26 (d,  $J = 3.0$  Hz), 130.63 (d,  $J = 9.1$  Hz), 130.02 (d,  $J = 3.0$  Hz), 129.15, 128.44, 128.02, 127.91, 127.76, 127.49 (d,  $J = 11.1$  Hz), 127.18, 126.75, 126.13 (d,  $J = 2.0$  Hz), 125.56 (d,  $J = 3.0$  Hz), 116.79 (d,  $J = 10.1$  Hz), 110.90 (d,  $J = 2.0$  Hz), 53.49 (d,  $J = 57.6$  Hz), 34.70.  $^{31}\text{P}$  NMR (162 MHz,  $\text{CDCl}_3$ )  $\delta$  26.16 (s). **HRMS (ESI):** ( $[\text{M}+\text{Na}]^+$ ) Calcd for  $\text{C}_{34}\text{H}_{24}\text{ClNaO}_2\text{P}^+$ : 553.1095, Found: 553.1096.

**(2-bromo-6-phenylnaphtho[2,3-b]benzofuran-11a(11H)-yl)diphenylphosphine oxide (5m)**

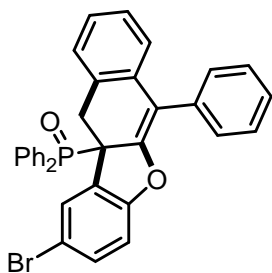

A white solid, (53 mg, 46% yield). **<sup>1</sup>H NMR** (400 MHz, CDCl<sub>3</sub>) δ 7.84-7.77 (m, 4H), 7.65-7.64 (m, 1H), 7.53-7.47 (m, 4H), 7.44-7.41 (m, 1H), 7.39-7.35 (m, 1H), 7.33-7.28 (m, 2H), 7.18-7.12 (m, 3H), 7.10-7.05 (m, 2H), 6.94-6.91 (m, 1H), 6.79-6.76 (m, 1H), 6.54-6.50 (m, 2H), 4.27-4.20 (m, 1H), 3.61-3.49 (m, 1H). **<sup>13</sup>C NMR** (101 MHz, CDCl<sub>3</sub>) δ 158.15 (d, *J* = 4.0 Hz), 152.46 (d, *J* = 6.1 Hz), 135.87 (d, *J* = 4.0 Hz), 134.51 (d, *J* = 4.0 Hz), 131.87 (dd, *J* = 34.3, 2.0 Hz), 131.57 (d, *J* = 8.1 Hz), 131.27 (d, *J* = 3.0 Hz), 130.65 (d, *J* = 8.1 Hz), 130.39 (dd, *J* = 28.3, 4.1 Hz), 130.14 (d, *J* = 192.9 Hz), 130.02 (d, *J* = 3.0 Hz), 128.45, 128.03, 127.91, 127.77, 127.50 (d, *J* = 11.1 Hz), 127.19, 126.77, 126.14 (d, *J* = 2.0 Hz), 116.79 (d, *J* = 11.1 Hz), 114.79 (d, *J* = 3.0 Hz), 111.44 (d, *J* = 2.0 Hz), 53.46 (d, *J* = 58.6 Hz), 34.71. **<sup>31</sup>P NMR** (162 MHz, CDCl<sub>3</sub>) δ 25.80 (s). **HRMS (ESI):** ([M+Na]<sup>+</sup>) Calcd for C<sub>34</sub>H<sub>24</sub>BrNaO<sub>2</sub>P<sup>+</sup>: 597.0590, Found: 597.0590.

**(3-fluoro-6-phenylnaphtho[2,3-b]benzofuran-11a(11H)-yl)diphenylphosphine oxide (5n)**

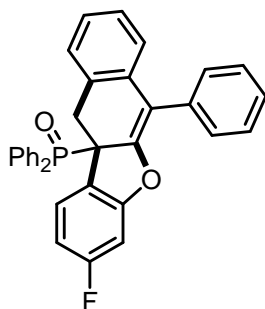

A white solid, (72 mg, 70% yield). **<sup>1</sup>H NMR** (500 MHz, CDCl<sub>3</sub>) δ 7.79-7.73 (m, 4H), 7.49-7.43 (m, 5H), 7.41-7.38 (m, 1H), 7.35-7.32 (m, 1H), 7.28-7.25 (m, 2H), 7.13-7.08 (m, 2H), 7.05-7.01 (m, 2H), 6.90-6.87 (m, 1H), 6.76-6.73 (m, 1H), 6.61-6.58 (m, 1H), 6.49 (d, *J* = 10.0 Hz, 1H), 6.38-6.36 (m, 1H), 4.25-4.19 (m, 1H), 3.56-3.46 (m, 1H). **<sup>13</sup>C NMR** (126 MHz, CDCl<sub>3</sub>) δ 163.54 (d, *J* = 250.0 Hz), 159.95 (d, *J* = 12.6 Hz), 153.05 (d, *J* = 5.0 Hz), 135.93 (d, *J* = 5.0 Hz), 134.59 (d, *J* = 3.8 Hz), 131.74 (d, *J* = 3.8 Hz), 131.61 (d, *J* = 8.8 Hz), 131.26, 130.63 (d, *J* = 7.6 Hz), 130.11 (d, *J* = 2.5 Hz), 129.97 (d, *J* = 89.5 Hz), 128.54, 128.09, 128.00, 127.87, 127.57 (d, *J* = 11.3 Hz), 127.05



(d,  $J = 45.4$  Hz), 126.23, 123.80, 117.07 (d,  $J = 10.1$  Hz), 109.54 (d,  $J = 22.7$  Hz), 98.79 (d,  $J = 26.5$  Hz), 52.71 (d,  $J = 59.2$  Hz), 35.00.  $^{31}\text{P}$  NMR (202 MHz,  $\text{CDCl}_3$ )  $\delta$  26.56 (s).  $^{19}\text{F}$  NMR (471 MHz,  $\text{CDCl}_3$ )  $\delta$  -110.55 (s). **HRMS (ESI):** ( $[\text{M}+\text{H}]^+$ ) Calcd for  $\text{C}_{34}\text{H}_{25}\text{FO}_2\text{P}^+$ : 515.1571, Found: 515.1571.

**(7-(naphthalen-2-yl)phenanthro[2,3-b]benzofuran-12b(13H)-yl)diphenylphosphine oxide (5o-1)**

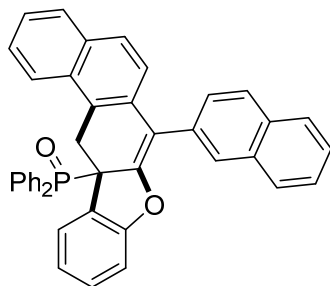

A white solid, (39 mg, 33% yield).  $^1\text{H}$  NMR (500 MHz,  $\text{CDCl}_3$ )  $\delta$  8.29 (d,  $J = 5.0$  Hz, 1H), 8.00 (s, 1H), 7.97-7.91 (m, 3H), 7.89-7.85 (m, 2H), 7.67-7.64 (m, 2H), 7.62-7.54 (m, 6H), 7.45-7.42 (m, 1H), 7.37-7.34 (m, 1H), 7.31-7.28 (m, 2H), 7.23 (d,  $J = 10.0$  Hz, 1H), 7.07-7.04 (m, 1H), 6.97-6.92 (m, 2H), 6.79-6.75 (m, 2H), 6.70-6.67 (m, 2H), 5.09-5.03 (m, 1H), 3.75-3.65 (m, 1H).  $^{13}\text{C}$  NMR (126 MHz,  $\text{CDCl}_3$ )  $\delta$  159.45 (d,  $J = 5.0$  Hz), 153.55 (d,  $J = 6.3$  Hz), 134.07 (d,  $J = 3.8$  Hz), 133.49, 132.87 (d,  $J = 13.9$  Hz), 132.64, 131.68, 131.06, 130.99, 130.84 (d,  $J = 104.6$  Hz), 130.81 (d,  $J = 7.6$  Hz), 129.46, 129.25, 128.26, 128.20, 128.03, 127.93, 127.24, 126.90 (d,  $J = 60.5$  Hz), 126.35 (d,  $J = 7.6$  Hz), 125.82 (d,  $J = 3.8$  Hz), 125.33, 124.56, 124.19, 122.89, 116.49 (d,  $J = 10.1$  Hz), 110.12, 53.68 (d,  $J = 58.0$  Hz), 30.52.  $^{31}\text{P}$  NMR (202 MHz,  $\text{CDCl}_3$ )  $\delta$  26.47 (s). **HRMS (ESI):** ( $[\text{M}+\text{Na}]^+$ ) Calcd for  $\text{C}_{42}\text{H}_{29}\text{NaO}_2\text{P}^+$ : 619.1797, Found: 619.1789.

**(6-(naphthalen-2-yl)anthra[2,3-b]benzofuran-13a(13H)-yl)diphenylphosphine oxide (5o-2)**

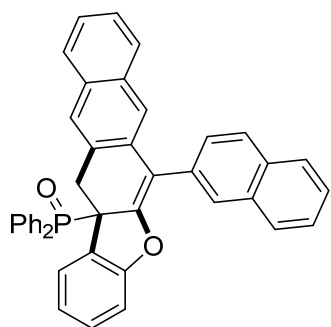

A white solid, (25 mg, 21% yield).  $^1\text{H}$  NMR (500 MHz,  $\text{CDCl}_3$ )  $\delta$  8.04 (s, 1H), 7.99-

7.93 (m, 3H), 7.85-7.81 (m, 2H), 7.72-7.68 (m, 2H), 7.66 (d,  $J = 10.0$  Hz, 1H), 7.62 (d,  $J = 10.0$  Hz, 1H), 7.59 (s, 1H), 7.57-7.55 (m, 3H), 7.37-7.27 (m, 6H), 7.05-7.02 (m, 1H), 6.93-6.90 (m, 1H), 6.89 (s, 1H), 6.78-6.75 (m, 1H), 6.70-6.67 (m, 3H), 4.49-4.44 (m, 1H), 3.74-3.65 (m, 1H).  $^{13}\text{C}$  NMR (126 MHz,  $\text{CDCl}_3$ )  $\delta$  159.02 (d,  $J = 3.8$  Hz), 154.24, 134.44 (d,  $J = 3.8$  Hz), 133.53, 132.98 (d,  $J = 3.8$  Hz), 132.63, 132.45, 131.81 (d,  $J = 7.6$  Hz), 131.65, 130.78, 130.72, 129.93 (d,  $J = 6.3$  Hz), 129.45, 128.27, 128.06 (d,  $J = 7.6$  Hz), 127.94, 127.36, 127.15, 127.06, 126.96, 126.38, 125.74, 125.57 (d,  $J = 3.8$  Hz), 125.16, 122.91, 116.86 (d,  $J = 10.1$  Hz), 110.12, 53.59 (d,  $J = 59.2$  Hz), 35.89.  $^{31}\text{P}$  NMR (202 MHz,  $\text{CDCl}_3$ )  $\delta$  27.89 (s). **HRMS (ESI):** ( $[\text{M}+\text{Na}]^+$ ) Calcd for  $\text{C}_{42}\text{H}_{29}\text{NaO}_2\text{P}^+$ : 619.1797, Found: 619.1794.

**(6,9-dimethylnaphtho[2,3-b]benzofuran-11a(11H)-yl)diphenylphosphine oxide**

**(5p)**

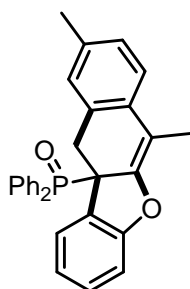

A white solid, (28 mg, 31% yield).  $^1\text{H}$  NMR (400 MHz,  $\text{CDCl}_3$ )  $\delta$  7.71-7.65 (m, 4H), 7.51 (d,  $J = 8.0$  Hz, 1H), 7.32-7.26 (m, 1H), 7.22-7.15 (m, 3H), 7.08-7.03 (m, 3H), 6.92-6.89 (m, 1H), 6.84 (s, 1H), 6.73 (d,  $J = 8.0$  Hz, 1H), 6.67 (d,  $J = 8.0$  Hz, 1H), 6.59 (d,  $J = 8.0$  Hz, 1H), 4.17-4.10 (m, 1H), 3.45-3.33 (m, 1H), 2.20 (s, 3H), 2.13 (d,  $J = 4.0$  Hz, 3H).  $^{13}\text{C}$  NMR (101 MHz,  $\text{CDCl}_3$ )  $\delta$  159.12 (d,  $J = 4.0$  Hz), 151.53 (d,  $J = 5.1$  Hz), 135.74, 133.71 (d,  $J = 4.0$  Hz), 131.56 (d,  $J = 9.1$  Hz), 131.12 (dd,  $J = 36.4, 3.0$  Hz), 130.72 (d,  $J = 8.1$  Hz), 129.22 (dd,  $J = 190.9, 4.0$  Hz), 129.17 (d,  $J = 3.0$  Hz), 128.67 (d,  $J = 1.4$  Hz), 127.72, 127.60, 127.04 (d,  $J = 11.1$  Hz), 125.62 (d,  $J = 4.0$  Hz), 122.89 (d,  $J = 2.0$  Hz), 122.36 (d,  $J = 3.0$  Hz), 109.57 (d,  $J = 2.0$  Hz), 109.23 (d,  $J = 11.1$  Hz), 52.39 (d,  $J = 59.6$  Hz), 34.84, 20.93, 11.40 (d,  $J = 4.0$  Hz).  $^{31}\text{P}$  NMR (162 MHz,  $\text{CDCl}_3$ )  $\delta$  26.07 (s). **HRMS (ESI):** ( $[\text{M}+\text{Na}]^+$ ) Calcd for  $\text{C}_{30}\text{H}_{25}\text{NaO}_2\text{P}^+$ : 471.1484, Found: 471.1484.

**(9-methoxy-6-methylnaphtho[2,3-b]benzofuran-11a(11H)-yl)diphenylphosphine oxide (5q)**

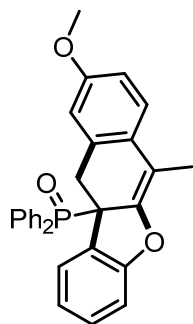

A white solid, (19 mg, 20% yield). **<sup>1</sup>H NMR** (600 MHz, CDCl<sub>3</sub>) δ 7.69-7.64 (m, 4H), 7.47 (d, *J* = 6.0 Hz, 1H), 7.26-7.23 (m, 1H), 7.17-7.12 (m, 3H), 7.05-7.00 (m, 3H), 6.87-6.84 (m, 1H), 6.69 (d, *J* = 6.0 Hz, 1H), 6.59-6.57 (m, 2H), 6.37-6.35 (m, 1H), 4.12-4.07 (m, 1H), 3.68 (s, 3H), 3.40-3.31 (m, 1H), 2.08 (d, *J* = 6.0 Hz, 3H). **<sup>13</sup>C NMR** (151 MHz, CDCl<sub>3</sub>) δ 159.17 (d, *J* = 4.5 Hz), 158.05, 150.58 (d, *J* = 4.0 Hz), 131.95 (d, *J* = 3.0 Hz), 131.54 (d, *J* = 7.6 Hz), 131.19 (dd, *J* = 31.7, 3.1 Hz), 130.71 (d, *J* = 9.1 Hz), 129.20, 127.67 (d, *J* = 10.6 Hz), 127.13 (d, *J* = 12.1 Hz), 125.55 (d, *J* = 3.0 Hz), 123.99, 122.32 (d, *J* = 3.0 Hz), 113.88, 112.24, 109.57, 109.06 (d, *J* = 10.6 Hz), 55.34, 52.30 (d, *J* = 60.4 Hz), 35.15, 11.45 (d, *J* = 3.0 Hz). **<sup>31</sup>P NMR** (243 MHz, CDCl<sub>3</sub>) δ 25.78 (s). **HRMS (ESI):** ([M+Na]<sup>+</sup>) Calcd for C<sub>30</sub>H<sub>25</sub>NaO<sub>3</sub>P<sup>+</sup>: 487.1434, Found: 487.1433.

**(9-fluoro-6-methylnaphtho[2,3-b]benzofuran-11a(11H)-yl)diphenylphosphine oxide (5r)**

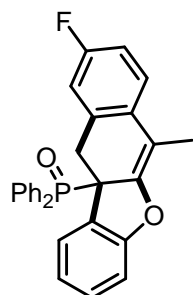

A white solid, (23 mg, 25% yield). **<sup>1</sup>H NMR** (400 MHz, CDCl<sub>3</sub>) δ 7.72-7.66 (m, 4H), 7.48 (d, *J* = 8.0 Hz, 1H), 7.32-7.29 (m, 1H), 7.23-7.19 (m, 3H), 7.13-7.05 (m, 3H), 6.92-6.88 (m, 1H), 6.78-6.73 (m, 2H), 6.65-6.61 (m, 1H), 6.57-6.52 (m, 1H), 4.21-4.14 (m, 1H), 3.44-3.32 (m, 1H), 2.12 (d, *J* = 4.0 Hz, 3H). **<sup>13</sup>C NMR** (101 MHz, CDCl<sub>3</sub>) δ 161.10 (d, *J* = 246.4 Hz), 158.98 (d, *J* = 4.0 Hz), 151.92, 132.70, 131.54 (d, *J* = 8.1 Hz), 131.34 (dd, *J* = 12.1, 3.0 Hz), 130.67 (d, *J* = 8.1 Hz), 130.26 (d, *J* = 19.2 Hz), 129.30 (d, *J* = 3.0 Hz), 127.94 (d, *J* = 4.0 Hz), 127.72 (d, *J* = 11.1 Hz), 127.27 (d, *J* = 12.1 Hz), 125.48

(d,  $J = 3.0$  Hz), 124.18 (d,  $J = 8.1$  Hz), 122.52 (d,  $J = 2.0$  Hz), 114.16 (dd,  $J = 161.6$ , 22.2 Hz), 109.66 (d,  $J = 2.0$  Hz), 108.56 (d,  $J = 11.1$  Hz), 52.16 (d,  $J = 58.6$  Hz), 34.70, 11.50 (d,  $J = 4.0$  Hz).  **$^{31}\text{P}$  NMR** (162 MHz,  $\text{CDCl}_3$ )  $\delta$  26.06 (s).  **$^{19}\text{F}$  NMR** (376 MHz,  $\text{CDCl}_3$ )  $\delta$  -116.69 (s). **HRMS (ESI):** ( $[\text{M}+\text{Na}]^+$ ) Calcd for  $\text{C}_{29}\text{H}_{22}\text{FNaO}_2\text{P}^+$ : 475.1234, Found: 475.1231.

**(6-ethylnaphtho[2,3-b]benzofuran-11a(11H)-yl)diphenylphosphine oxide (5s)**

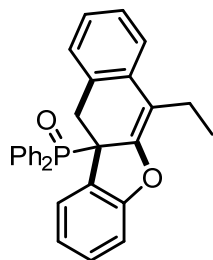

A white solid, (30 mg, 33% yield).  **$^1\text{H}$  NMR** (500 MHz,  $\text{CDCl}_3$ )  $\delta$  7.69-7.64 (m, 4H), 7.49 (d,  $J = 10.0$  Hz, 1H), 7.27-7.24 (m, 1H), 7.19-7.15 (m, 2H), 7.15-7.11 (m, 1H), 7.04-6.99 (m, 4H), 6.89-6.86 (m, 1H), 6.84-6.81 (m, 2H), 6.74-6.73 (m, 1H), 6.70 (d,  $J = 5.0$  Hz, 1H), 4.19-4.14 (m, 1H), 3.43-3.34 (m, 1H), 2.69-2.59 (m, 2H), 1.22 (t,  $J = 7.5$  Hz, 3H).  **$^{13}\text{C}$  NMR** (126 MHz,  $\text{CDCl}_3$ )  $\delta$  159.13 (d,  $J = 3.8$  Hz), 152.01 (d,  $J = 5.0$  Hz), 135.56 (d,  $J = 5.0$  Hz), 131.77 (d,  $J = 8.8$  Hz), 131.26 (dd,  $J = 34.0$ , 3.8 Hz), 130.77, 130.70, 129.28 (d,  $J = 2.5$  Hz), 128.08, 127.74 (d,  $J = 12.6$  Hz), 127.29 (d,  $J = 11.3$  Hz), 127.18, 126.16, 125.67 (d,  $J = 3.8$  Hz), 122.92, 122.51 (d,  $J = 3.8$  Hz), 115.51 (d,  $J = 11.3$  Hz), 109.69, 52.24 (d,  $J = 59.2$  Hz), 34.94, 19.21 (d,  $J = 2.5$  Hz), 13.64 (d,  $J = 6.3$  Hz).  **$^{31}\text{P}$  NMR** (202 MHz,  $\text{CDCl}_3$ )  $\delta$  26.55 (s). **HRMS (ESI):** ( $[\text{M}+\text{Na}]^+$ ) Calcd for  $\text{C}_{30}\text{H}_{25}\text{NaO}_2\text{P}^+$ : 471.1484, Found: 471.1481

**diphenyl(4-(1-(p-tolyl)vinyl)-2H-chromen-3-yl)phosphine oxide (6a)**

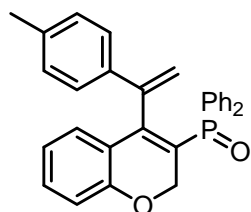

A white solid, (82 mg, 91% yield).  **$^1\text{H}$  NMR** (500 MHz,  $\text{CDCl}_3$ )  $\delta$  7.69-7.58 (m, 4H), 7.40-7.37 (m, 2H), 7.31-7.26 (m, 4H), 7.20-7.17 (m, 1H), 7.06 (d,  $J = 10.0$  Hz, 1H), 7.00 (d,  $J = 5.0$  Hz, 2H), 6.92-6.89 (m, 3H), 6.78-6.75 (m, 1H), 5.55 (s, 1H), 5.11 (s, 1H), 4.90-4.86 (m, 1H), 4.80-4.77 (m, 1H), 2.26 (s, 3H).  **$^{13}\text{C}$  NMR** (126 MHz,  $\text{CDCl}_3$ )

$\delta$  155.26, 148.47 (d,  $J = 6.3$  Hz), 141.33 (d,  $J = 5.0$  Hz), 137.80, 134.69, 132.04, 131.91, 131.75, 131.59, 128.88, 128.32 (d,  $J = 8.8$  Hz), 127.72, 125.93, 123.80 (d,  $J = 12.6$  Hz), 121.98, 121.84 (d,  $J = 102.1$  Hz), 116.65, 116.41, 66.31 (d,  $J = 17.6$  Hz), 21.23.  **$^{31}\text{P}$  NMR** (202 MHz,  $\text{CDCl}_3$ )  $\delta$  26.65. **HRMS (ESI):** ( $[\text{M}+\text{H}]^+$ ) Calcd for  $\text{C}_{30}\text{H}_{26}\text{O}_2\text{P}^+$ : 449.1665, Found: 449.1665.

**diphenyl(4-(1-(m-tolyl)vinyl)-2H-chromen-3-yl)phosphine oxide (6b)**

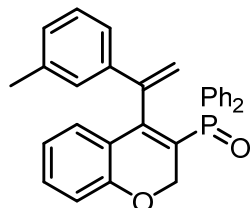

A white solid, (74 mg, 83% yield).  **$^1\text{H}$  NMR** (500 MHz,  $\text{CDCl}_3$ )  $\delta$  7.67–7.58 (m, 4H), 7.41–7.38 (m, 2H), 7.30–7.26 (m, 4H), 7.21–7.18 (m, 1H), 7.08 (d,  $J = 5.0$  Hz, 1H), 7.01–6.98 (m, 1H), 6.95 (d,  $J = 10.0$  Hz, 1H), 6.92–6.85 (m, 3H), 6.80–6.77 (m, 3H), 5.61 (s, 1H), 5.17 (s, 1H), 4.90–4.86 (m, 1H), 4.82–4.79 (m, 1H), 2.20 (s, 3H).  **$^{13}\text{C}$  NMR** (126 MHz,  $\text{CDCl}_3$ )  $\delta$  155.24, 148.36, 141.58, 137.43 (d,  $J = 7.6$  Hz), 132.76, 132.12, 131.93, 131.76, 131.61, 128.75, 128.31, 128.21, 128.06, 127.71, 126.37, 123.90 (d,  $J = 11.3$  Hz), 123.39, 121.99, 117.49, 116.40, 66.29 (d,  $J = 17.6$  Hz), 21.55.  **$^{31}\text{P}$  NMR** (202 MHz,  $\text{CDCl}_3$ )  $\delta$  26.78. **HRMS (ESI):** ( $[\text{M}+\text{H}]^+$ ) Calcd for  $\text{C}_{30}\text{H}_{26}\text{O}_2\text{P}^+$ : 449.1665, Found: 449.1667.

**(4-(1-(4-methoxyphenyl)vinyl)-2H-chromen-3-yl)diphenylphosphine oxide (6c)**

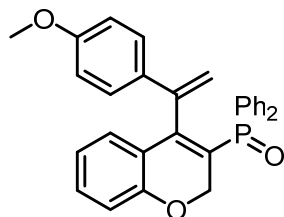

A white solid, (82 mg, 88% yield).  **$^1\text{H}$  NMR** (500 MHz,  $\text{CDCl}_3$ )  $\delta$  7.68–7.59 (m, 4H), 7.41–7.38 (m, 2H), 7.31–7.26 (m, 4H), 7.20–7.17 (m, 1H), 7.06 (d,  $J = 10.0$  Hz, 1H), 7.02 (d,  $J = 10.0$  Hz, 2H), 6.90 (d,  $J = 10.0$  Hz, 1H), 6.79–6.76 (m, 1H), 6.64 (d,  $J = 10.0$  Hz, 2H), 5.45 (s, 1H), 5.07 (s, 1H), 4.91–4.87 (m, 1H), 4.80–4.76 (m, 1H), 3.74 (s, 3H).  **$^{13}\text{C}$  NMR** (126 MHz,  $\text{CDCl}_3$ )  $\delta$  159.48, 155.28, 148.52, 140.89 (d,  $J = 6.3$  Hz), 132.07, 131.89, 131.81, 131.61, 130.26, 128.29 (d,  $J = 11.3$  Hz), 127.69, 127.31, 123.72

(d,  $J = 11.3$  Hz), 121.98, 121.74 (d,  $J = 100.8$  Hz), 116.42, 115.68, 113.52, 66.28 (d,  $J = 17.6$  Hz), 55.33.  **$^{31}\text{P}$  NMR** (202 MHz,  $\text{CDCl}_3$ )  $\delta$  26.83. **HRMS (ESI):** ( $[\text{M}+\text{H}]^+$ ) Calcd for  $\text{C}_{30}\text{H}_{26}\text{O}_3\text{P}^+$ : 465.1614, Found: 465.1617.

**(6-methyl-4-(1-(p-tolyl)vinyl)-2H-chromen-3-yl)diphenylphosphine oxide (6d)**

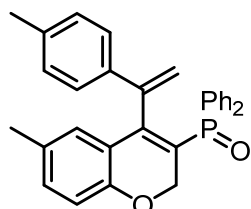

A white solid, (80 mg, 87% yield).  **$^1\text{H}$  NMR** (500 MHz,  $\text{CDCl}_3$ )  $\delta$  7.67–7.56 (m, 4H), 7.40–7.38 (m, 2H), 7.31–7.25 (m, 4H), 7.01–6.98 (m, 3H), 6.92 (d,  $J = 5.0$  Hz, 2H), 6.88 (s, 1H), 6.81 (d,  $J = 10.0$  Hz, 1H), 5.56 (s, 1H), 5.09 (s, 1H), 4.86–4.82 (m, 1H), 4.75–4.72 (m, 1H), 2.27 (s, 3H), 2.09 (s, 3H).  **$^{13}\text{C}$  NMR** (126 MHz,  $\text{CDCl}_3$ )  $\delta$  153.15, 148.63 (d,  $J = 6.3$  Hz), 141.35 (d,  $J = 5.0$  Hz), 137.71, 134.85, 132.29, 131.92, 131.84, 131.71, 131.23, 128.86, 128.28 (d,  $J = 8.8$  Hz), 127.74, 125.92, 123.65 (d,  $J = 12.6$  Hz), 121.63 (d,  $J = 102.1$  Hz), 116.47, 116.12, 66.33 (d,  $J = 17.6$  Hz), 21.23, 20.80.  **$^{31}\text{P}$  NMR** (202 MHz,  $\text{CDCl}_3$ )  $\delta$  26.74. **HRMS (ESI):** ( $[\text{M}+\text{H}]^+$ ) Calcd for  $\text{C}_{31}\text{H}_{28}\text{O}_2\text{P}^+$ : 463.1821, Found: 463.1823.

**(6-methoxy-4-(1-(p-tolyl)vinyl)-2H-chromen-3-yl)diphenylphosphine oxide (6e)**

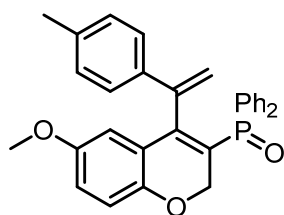

A white solid, (78 mg, 82% yield).  **$^1\text{H}$  NMR** (500 MHz,  $\text{CDCl}_3$ )  $\delta$  7.69–7.57 (m, 4H), 7.41–7.38 (m, 2H), 7.31–7.25 (m, 4H), 6.99 (d,  $J = 10.0$  Hz, 2H), 6.91 (d,  $J = 10.0$  Hz, 2H), 6.84 (d,  $J = 10.0$  Hz, 1H), 6.76–6.74 (m, 1H), 6.61 (d,  $J = 3.0$  Hz, 1H), 5.54 (s, 1H), 5.11 (s, 1H), 4.83–4.80 (m, 1H), 4.73–4.69 (m, 1H), 3.53 (s, 3H), 2.25 (s, 3H).  **$^{13}\text{C}$  NMR** (126 MHz,  $\text{CDCl}_3$ )  $\delta$  154.29, 149.30, 148.53 (d,  $J = 6.3$  Hz), 141.37 (d,  $J = 6.3$  Hz), 137.75, 134.75, 131.89, 128.88, 128.33, 125.99, 124.35 (d,  $J = 11.3$  Hz), 122.63 (d,  $J = 100.8$  Hz), 117.38, 116.97, 116.81, 112.19, 66.49 (d,  $J = 17.6$  Hz), 55.66, 21.22.  **$^{31}\text{P}$  NMR** (202 MHz,  $\text{CDCl}_3$ )  $\delta$  26.66. **HRMS (ESI):** ( $[\text{M}+\text{H}]^+$ ) Calcd for  $\text{C}_{31}\text{H}_{28}\text{O}_3\text{P}^+$ :

479.1771, Found: 479.1773.

**(6-fluoro-4-(1-(p-tolyl)vinyl)-2H-chromen-3-yl)diphenylphosphine oxide (6f)**

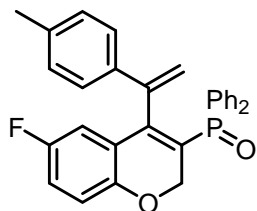

A white solid, (75 mg, 81% yield). **<sup>1</sup>H NMR** (500 MHz, CDCl<sub>3</sub>) δ 7.67–7.57 (m, 4H), 7.41–7.38 (m, 2H), 7.31–7.25 (m, 4H), 6.98 (d, *J* = 10.0 Hz, 2H), 6.93 (d, *J* = 5.0 Hz, 2H), 6.87–6.83 (m, 2H), 6.77–6.75 (m, 1H), 5.55 (s, 1H), 5.09 (s, 1H), 4.89–4.85 (m, 1H), 4.77–4.73 (m, 1H), 2.26 (s, 3H). **<sup>13</sup>C NMR** (126 MHz, CDCl<sub>3</sub>) δ 157.55 (d, *J* = 239.4 Hz), 151.24, 147.50 (d, *J* = 7.6 Hz), 140.92 (d, *J* = 6.3 Hz), 138.04, 134.29, 131.90, 131.82, 128.98, 128.42, 128.32, 125.88, 124.84 (dd, *J* = 12.0, 8.2 Hz), 123.55 (d, *J* = 99.5 Hz), 118.08 (d, *J* = 23.9 Hz), 117.44 (d, *J* = 7.6 Hz), 116.87, 113.65 (d, *J* = 25.2 Hz), 66.52 (d, *J* = 17.6 Hz), 21.22. **<sup>31</sup>P NMR** (202 MHz, CDCl<sub>3</sub>) δ 26.58. **<sup>19</sup>F NMR** (471 MHz, CDCl<sub>3</sub>) δ -120.71 (s). **HRMS (ESI):** ([M+H]<sup>+</sup>) Calcd for C<sub>30</sub>H<sub>25</sub>FO<sub>2</sub>P<sup>+</sup>: 467.1571, Found: 467.1577.

**(6-chloro-4-(1-(p-tolyl)vinyl)-2H-chromen-3-yl)diphenylphosphine oxide (6g)**

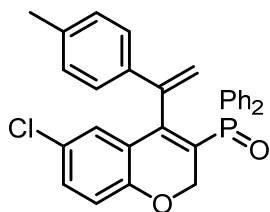

A white solid, (79 mg, 82% yield). **<sup>1</sup>H NMR** (500 MHz, CDCl<sub>3</sub>) δ 7.65–7.56 (m, 4H), 7.41–7.38 (m, 2H), 7.30–7.27 (m, 4H), 7.13–7.11 (m, 1H), 7.03 (d, *J* = 5.0 Hz, 1H), 6.97 (d, *J* = 5.0 Hz, 2H), 6.92 (d, *J* = 10.0 Hz, 2H), 6.84 (d, *J* = 5.0 Hz, 1H), 5.55 (s, 1H), 5.08 (s, 1H), 4.91–4.87 (m, 1H), 4.78–4.74 (m, 1H), 2.27 (s, 3H). **<sup>13</sup>C NMR** (126 MHz, CDCl<sub>3</sub>) δ 153.78, 147.15 (d, *J* = 6.3 Hz), 140.72 (d, *J* = 5.0 Hz), 138.05, 134.29, 131.94, 131.82, 131.26, 129.00, 128.42, 128.32, 127.05, 126.94, 125.84, 125.17 (d, *J* = 12.6 Hz), 123.35 (d, *J* = 99.5 Hz), 117.84, 116.92, 66.45 (d, *J* = 17.6 Hz), 21.24. **<sup>31</sup>P NMR** (202 MHz, CDCl<sub>3</sub>) δ 26.57. **HRMS (ESI):** ([M+H]<sup>+</sup>) Calcd for C<sub>30</sub>H<sub>25</sub>ClO<sub>2</sub>P<sup>+</sup>: 483.1275, Found: 483.1281.

**(6-bromo-4-(1-(p-tolyl)vinyl)-2H-chromen-3-yl)diphenylphosphine oxide (6h)**

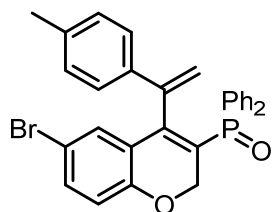

A white solid, (78 mg, 73% yield). **<sup>1</sup>H NMR** (500 MHz, CDCl<sub>3</sub>) δ 7.64–7.55 (m, 4H), 7.42–7.39 (m, 2H), 7.31–7.27 (m, 5H), 7.16 (s, 1H), 6.97–6.92 (m, 4H), 6.79 (d, *J* = 10.0 Hz, 1H), 5.55 (s, 1H), 5.08 (s, 1H), 4.91–4.87 (m, 1H), 4.78–4.74 (m, 1H), 2.28 (s, 3H). **<sup>13</sup>C NMR** (126 MHz, CDCl<sub>3</sub>) δ 154.29, 147.01, 140.65, 138.05, 134.29, 134.17, 131.95, 131.82, 129.94, 128.99, 128.41, 128.31, 125.83, 123.29 (d, *J* = 100.8 Hz), 118.28, 116.95, 66.39 (d, *J* = 17.6 Hz), 21.23. **<sup>31</sup>P NMR** (202 MHz, CDCl<sub>3</sub>) δ 26.59. **HRMS (ESI):** ([*M*+*H*]<sup>+</sup>) Calcd for C<sub>30</sub>H<sub>25</sub>BrO<sub>2</sub>P<sup>+</sup>: 527.0770, Found: 527.0776.

**(E)-diphenyl(4-(1-phenylprop-1-en-1-yl)-2H-chromen-3-yl)phosphine oxide (6i)**

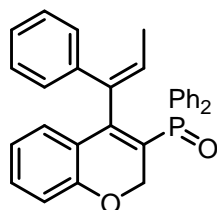

A white solid, (76 mg, 85% yield). **<sup>1</sup>H NMR** (500 MHz, CDCl<sub>3</sub>) δ 7.67–7.63 (m, 2H), 7.50–7.44 (m, 3H), 7.41–7.38 (m, 1H), 7.36–7.32 (m, 2H), 7.25–7.21 (m, 3H), 7.12–7.10 (m, 4H), 7.03–7.01 (m, 2H), 6.94 (d, *J* = 10.0 Hz, 1H), 6.85–6.82 (m, 1H), 6.01 (q, *J* = 5.0 Hz, 1H), 4.87–4.79 (m, 2H), 1.64 (d, *J* = 10.0 Hz, 3H). **<sup>13</sup>C NMR** (126 MHz, CDCl<sub>3</sub>) δ 155.45, 146.56 (d, *J* = 6.5 Hz), 139.13, 134.75 (d, *J* = 5.0 Hz), 132.52, 131.93 (d, *J* = 15.1 Hz), 131.73, 131.66, 128.47 (d, *J* = 12.6 Hz), 128.16, 128.07, 127.09 (d, *J* = 30.2 Hz), 126.07, 125.55, 123.44 (d, *J* = 12.6 Hz), 122.25, 121.97 (d, *J* = 102.1 Hz), 116.53, 66.28 (d, *J* = 17.6 Hz), 16.25. **<sup>31</sup>P NMR** (202 MHz, CDCl<sub>3</sub>) δ 25.76. **HRMS (ESI):** ([*M*+*H*]<sup>+</sup>) Calcd for C<sub>30</sub>H<sub>26</sub>O<sub>2</sub>P<sup>+</sup>: 449.1665, Found: 449.1669.

**(E)-(4-(1,3-diphenylprop-1-en-2-yl)-2H-chromen-3-yl)diphenylphosphine oxide (6j)**



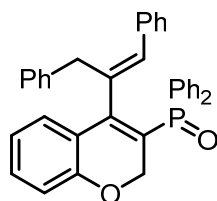

A white solid, (87 mg, 83% yield). **<sup>1</sup>H NMR** (500 MHz, CDCl<sub>3</sub>) δ 7.66–7.62 (m, 2H), 7.52–7.49 (m, 1H), 7.42–7.39 (m, 5H), 7.28–7.24 (m, 8H), 7.16 (br, 1H), 7.07 (br, 5H), 6.93 (d, *J* = 5.0 Hz, 1H), 6.87–6.84 (m, 1H), 6.03 (s, 1H), 4.69–4.64 (m, 1H), 4.48–4.44 (m, 1H), 3.81 (d, *J* = 15.0 Hz, 1H), 3.52 (d, *J* = 15.0 Hz, 1H). **<sup>13</sup>C NMR** (126 MHz, CDCl<sub>3</sub>) δ 155.56, 150.51 (d, *J* = 5.0 Hz), 137.49 (d, *J* = 171.4 Hz), 136.94 (d, *J* = 5.0 Hz), 132.09 (d, *J* = 3.8 Hz), 131.84, 131.63, 131.63 (d, *J* = 20.2 Hz), 130.31, 130.06, 128.81 (d, *J* = 12.6 Hz), 128.66, 128.45, 128.34, 128.18, 127.20, 126.78, 126.46, 122.51 (d, *J* = 12.6 Hz), 122.20, 118.06 (d, *J* = 99.5 Hz), 116.54, 66.25 (d, *J* = 18.9 Hz), 45.86. **<sup>31</sup>P NMR** (202 MHz, CDCl<sub>3</sub>) δ 25.19. **HRMS (ESI):** ([M+H]<sup>+</sup>) Calcd for C<sub>36</sub>H<sub>30</sub>O<sub>2</sub>P<sup>+</sup>: 525.1978, Found: 525.1974.

#### diphenyl(4-(1,2,2-triphenylvinyl)-2H-chromen-3-yl)phosphine oxide (6k)

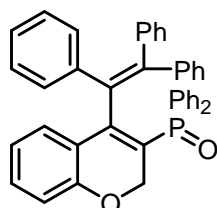

A white solid, (105 mg, 90% yield). **<sup>1</sup>H NMR** (400 MHz, CDCl<sub>3</sub>) δ 7.70–7.65 (m, 3H), 7.56–7.52 (m, 1H), 7.48–7.45 (m, 3H), 7.39–7.37 (m, 2H), 7.30–7.27 (m, 4H), 7.24–7.11 (m, 9H), 7.04–7.01 (m, 5H), 6.98–6.94 (m, 1H), 6.86 (d, *J* = 8.0 Hz, 1H), 4.41–4.30 (m, 2H). **<sup>13</sup>C NMR** (101 MHz, CDCl<sub>3</sub>) δ 155.33 (d, *J* = 2.0 Hz), 151.72 (d, *J* = 4.0 Hz), 143.70, 143.32 (d, *J* = 4.0 Hz), 140.67, 133.55, 132.51 (d, *J* = 3.0 Hz), 131.75, 131.63, 131.56, 131.45, 131.25, 130.82, 130.14, 128.68, 128.56, 128.08, 127.68, 127.52 (d, *J* = 9.1 Hz), 126.84, 126.54 (d, *J* = 21.2 Hz), 125.04 (d, *J* = 12.1 Hz), 122.03, 118.90 (d, *J* = 100.0 Hz), 116.31, 66.44 (d, *J* = 19.2 Hz). **<sup>31</sup>P NMR** (162 MHz, CDCl<sub>3</sub>) δ 24.19. **HRMS (ESI):** ([M+H]<sup>+</sup>) Calcd for C<sub>41</sub>H<sub>32</sub>O<sub>2</sub>P<sup>+</sup>: 587.2134, Found: 587.2130.

## diphenyl(1-(1-(p-tolyl)vinyl)-3H-benzo[f]chromen-2-yl)phosphine oxide (6l)

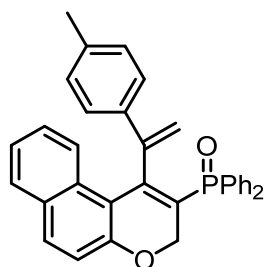

A white solid, (79 mg, 79% yield).  $^1\text{H NMR}$  (500 MHz,  $\text{CDCl}_3$ )  $\delta$  8.42–8.39 (m, 1H), 7.83 (br, 2H), 7.70 (d,  $J = 10.0$  Hz, 1H), 7.67–7.62 (m, 2H), 7.58–7.56 (m, 1H), 7.44–7.40 (m, 3H), 7.25 (br, 1H), 7.18–7.14 (m, 5H), 6.79 (d,  $J = 5.0$  Hz, 2H), 6.68 (d,  $J = 5.0$  Hz, 2H), 5.76 (s, 1H), 5.56 (s, 1H), 4.84 (br, 1H), 4.50 (br, 1H), 2.10 (s, 3H).  $^{13}\text{C NMR}$  (126 MHz,  $\text{CDCl}_3$ )  $\delta$  156.29, 150.11 (d,  $J = 6.3$  Hz), 144.88 (d,  $J = 6.3$  Hz), 137.42, 134.88, 133.55, 131.63, 131.53, 131.38, 129.87, 128.51, 128.43, 126.68, 126.19, 125.52, 124.00, 120.75 (d,  $J = 103.3$  Hz), 120.05, 117.73 (d,  $J = 11.3$  Hz), 117.15, 66.85 (d,  $J = 17.6$  Hz), 21.12.  $^{31}\text{P NMR}$  (202 MHz,  $\text{CDCl}_3$ )  $\delta$  26.39. **HRMS (ESI):** ( $[\text{M}+\text{H}]^+$ ) Calcd for  $\text{C}_{34}\text{H}_{28}\text{O}_2\text{P}^+$ : 499.1821, Found: 499.1819.

## 12. $^1\text{H-NMR}$ , $^{13}\text{C-NMR}$ , $^{31}\text{P-NMR}$ , $^{19}\text{F-NMR}$ , and HRMS Spectra for Products

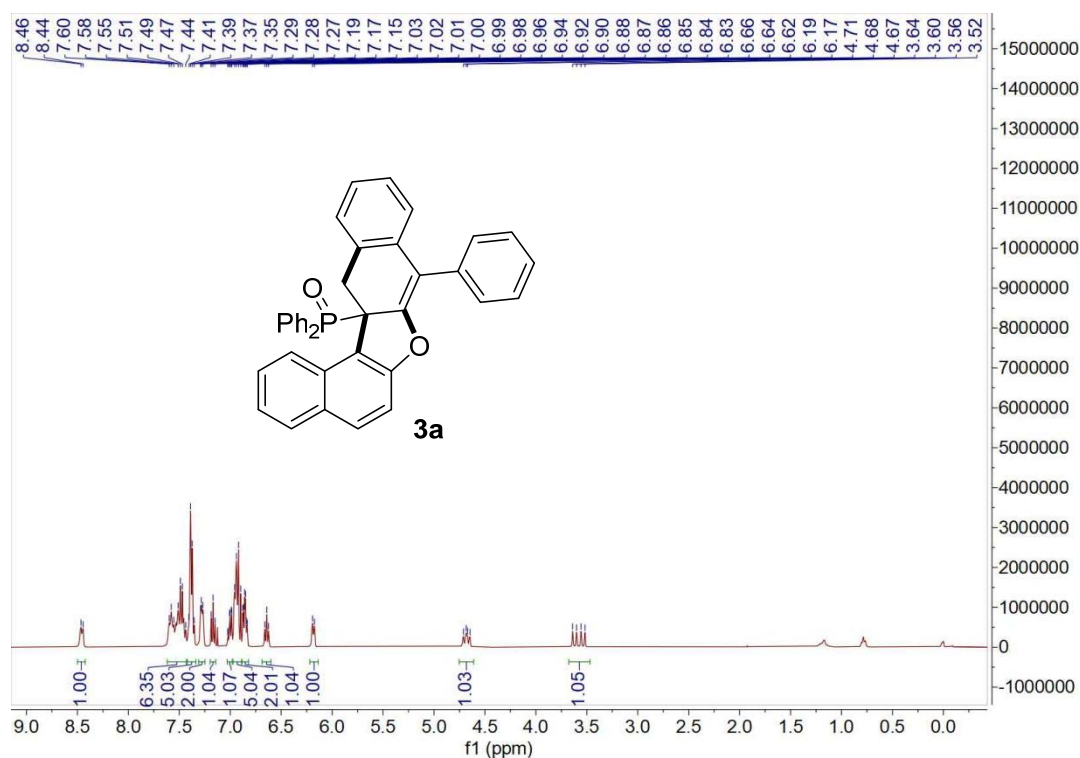

<sup>1</sup>H-NMR (400 MHz, CDCl<sub>3</sub>) of **3a**

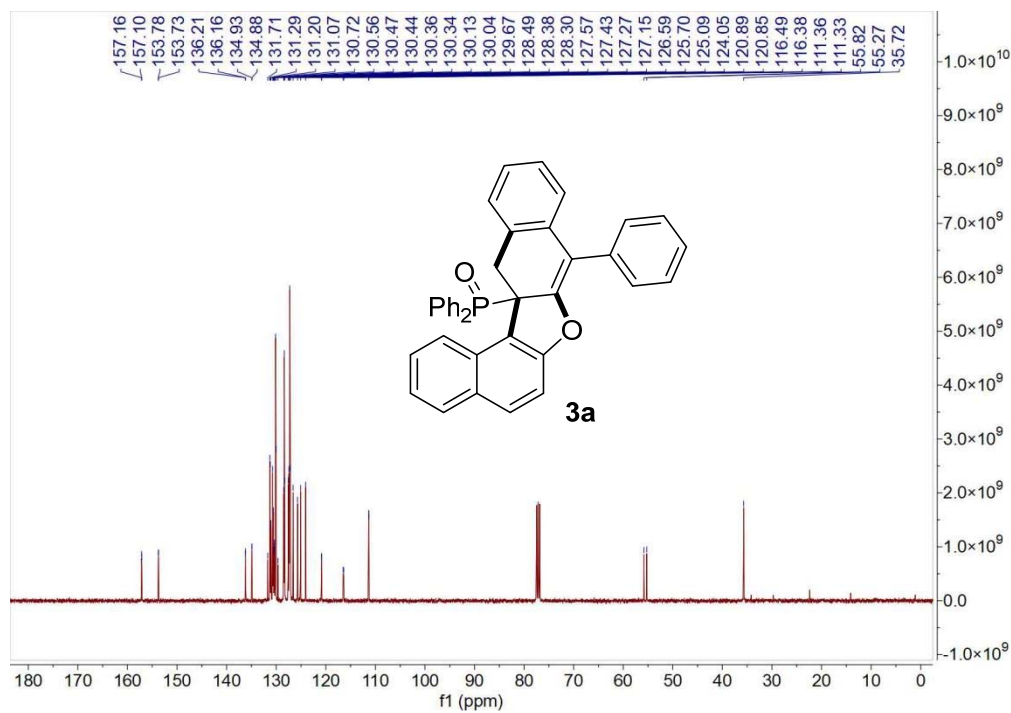

<sup>13</sup>C-NMR (101 MHz, CDCl<sub>3</sub>) of **3a**

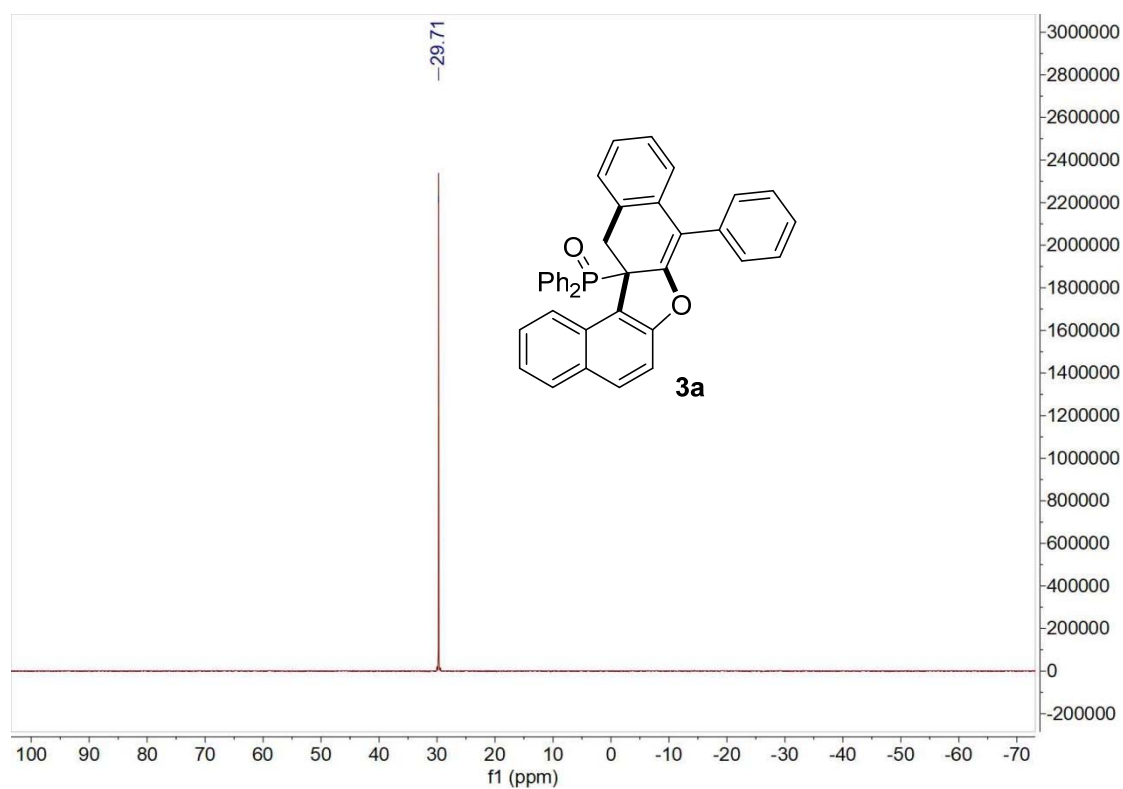

<sup>31</sup>P-NMR (162 MHz, CDCl<sub>3</sub>) of **3a**

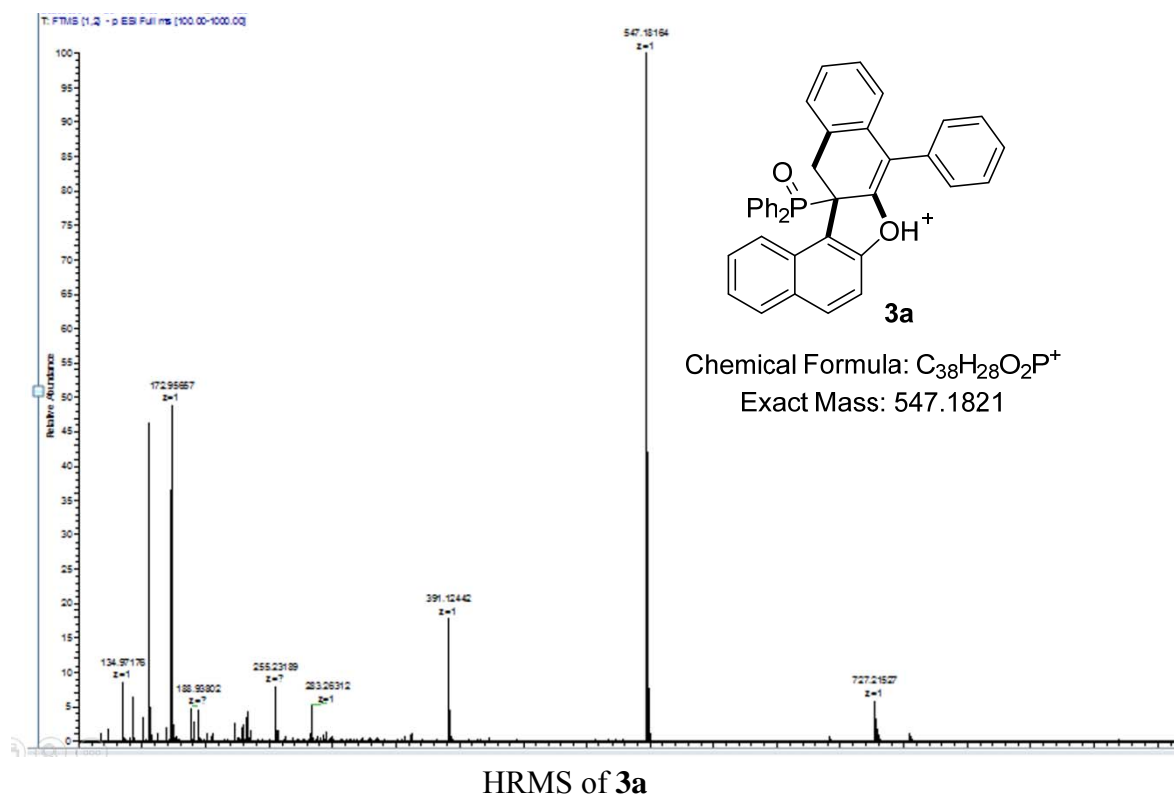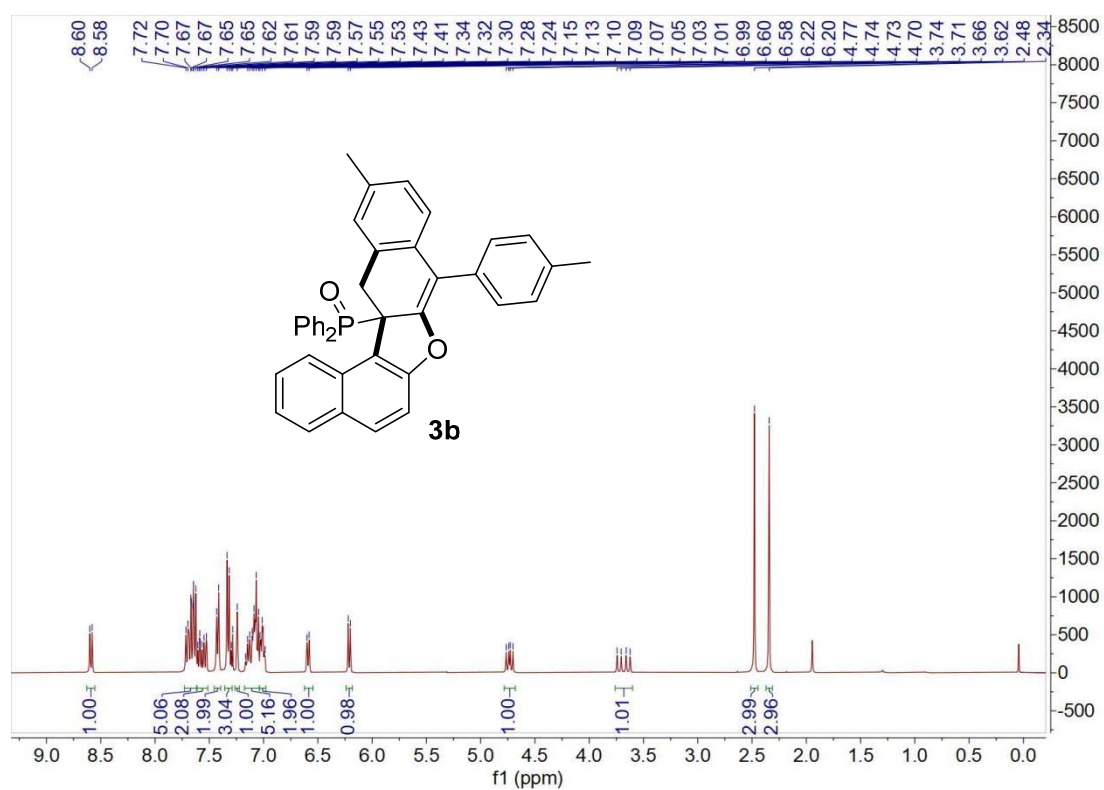

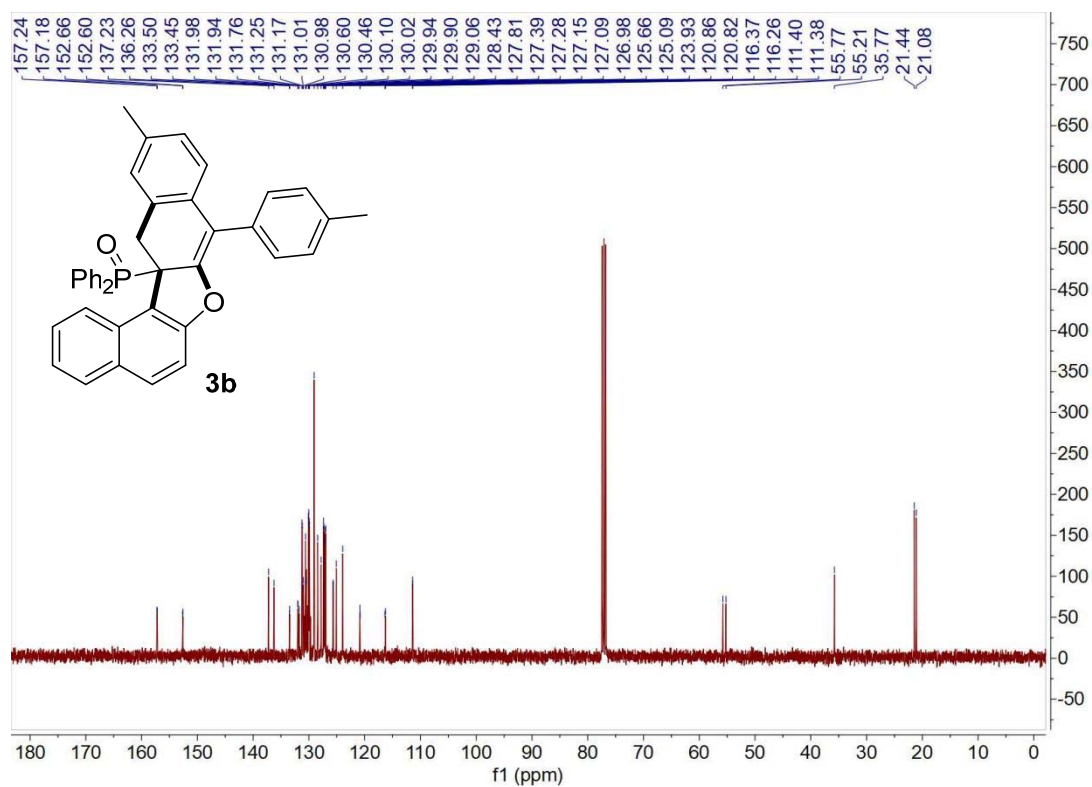

<sup>13</sup>C-NMR (101 MHz, CDCl<sub>3</sub>) of **3b**

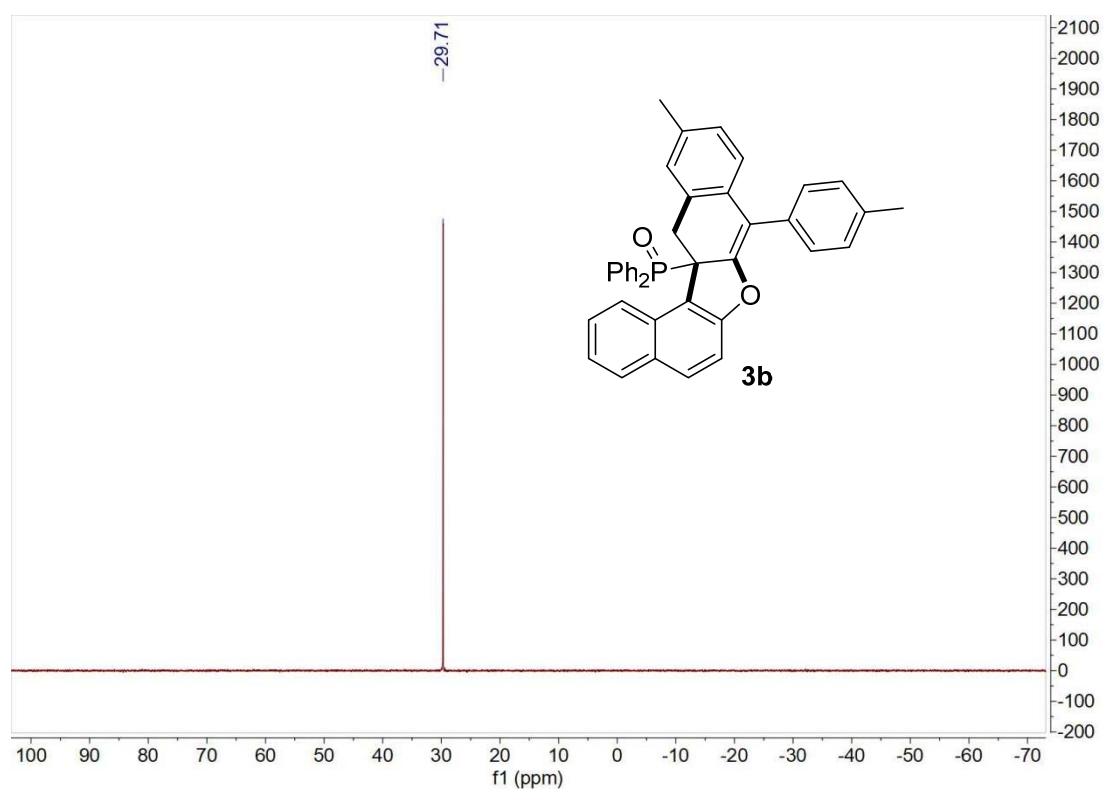

<sup>31</sup>P-NMR (162 MHz, CDCl<sub>3</sub>) of **3b**

20210515-26 #35 RT: 0.46 AV: 1 NL: 8.08E4  
T: FTMS (1,1) + p ESI Full ms [100.00-1000.00]

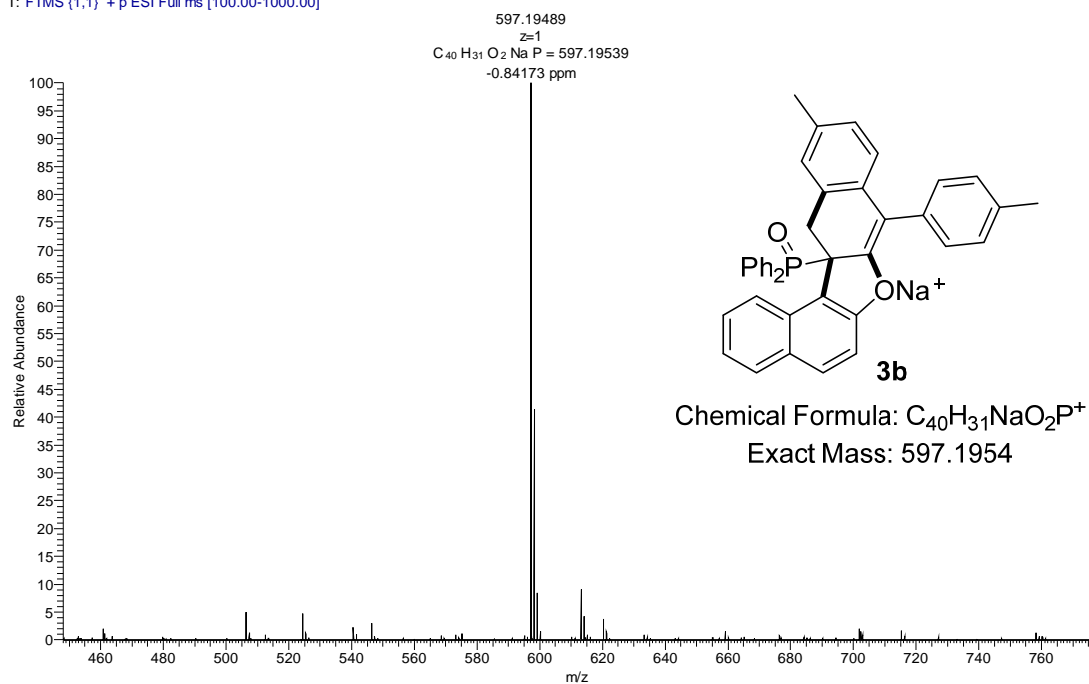

HRMS of **3b**

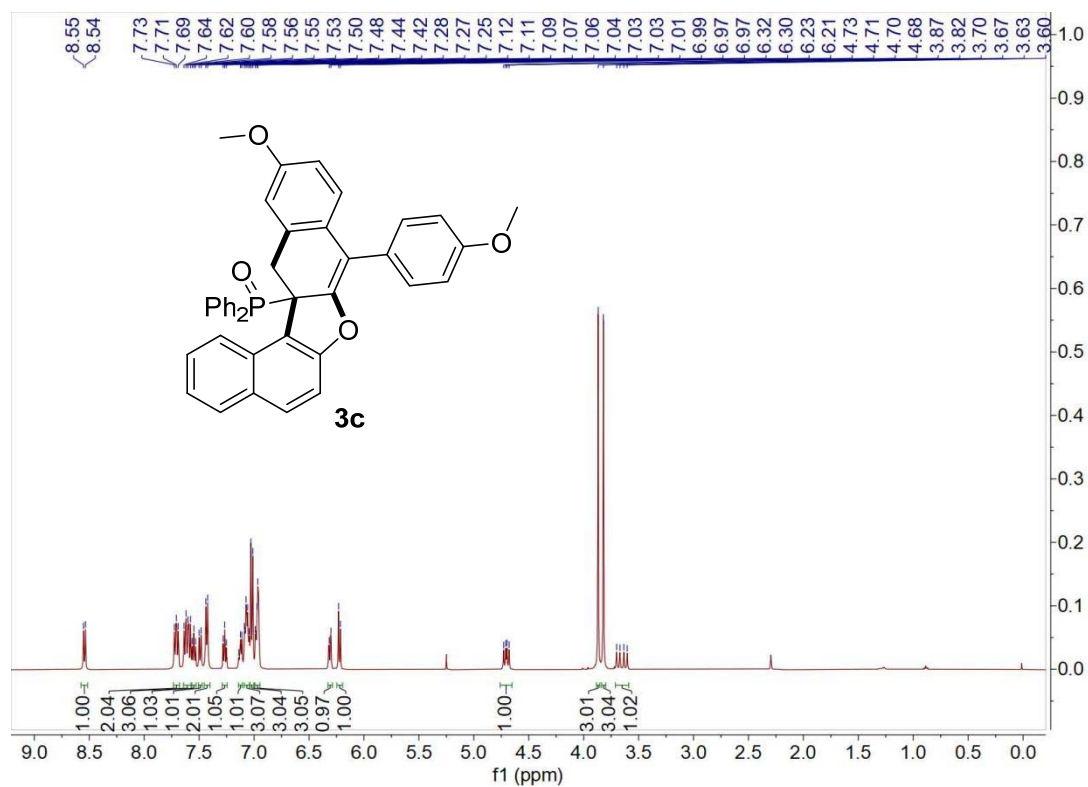

<sup>1</sup>H-NMR (500 MHz, CDCl<sub>3</sub>) of **3c**

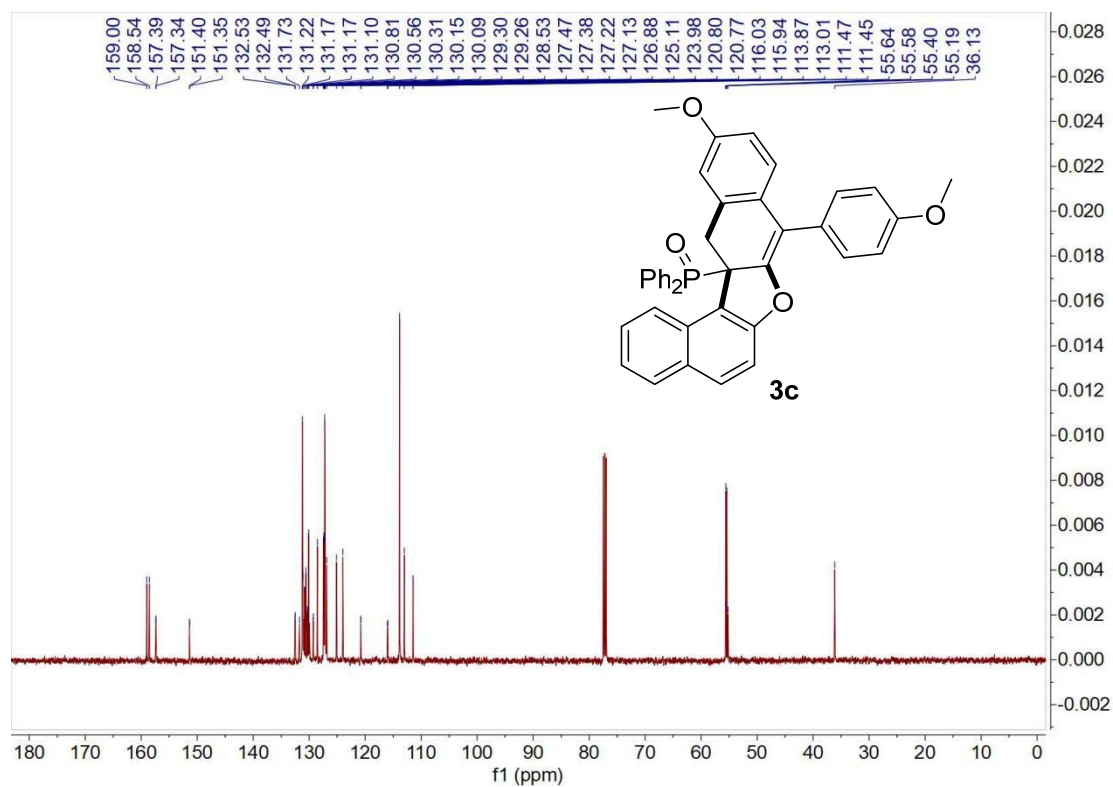

$^{13}\text{C}$ -NMR (126 MHz,  $\text{CDCl}_3$ ) of **3c**

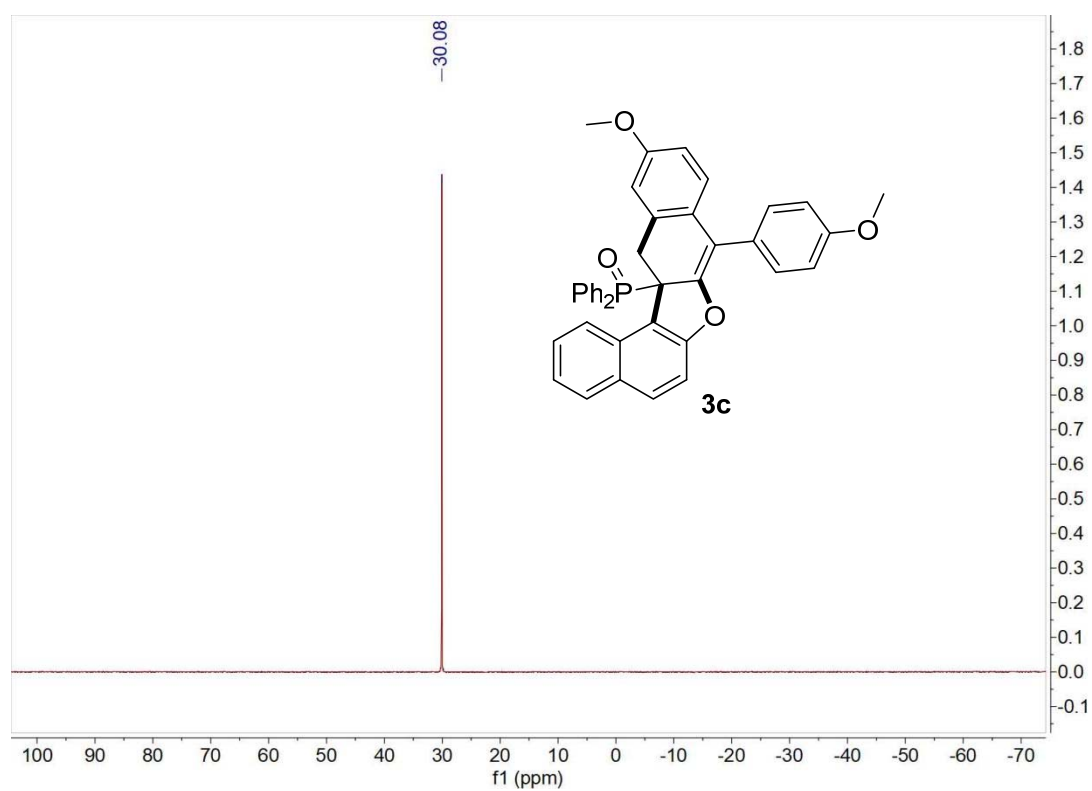

$^{31}\text{P}$ -NMR (202 MHz,  $\text{CDCl}_3$ ) of **3c**

20210515-24 #25 RT: 0.40 AV: 1 NL: 1.39E5  
T: FTMS (1,1) + p ESI Full ms [100.00-1000.00]

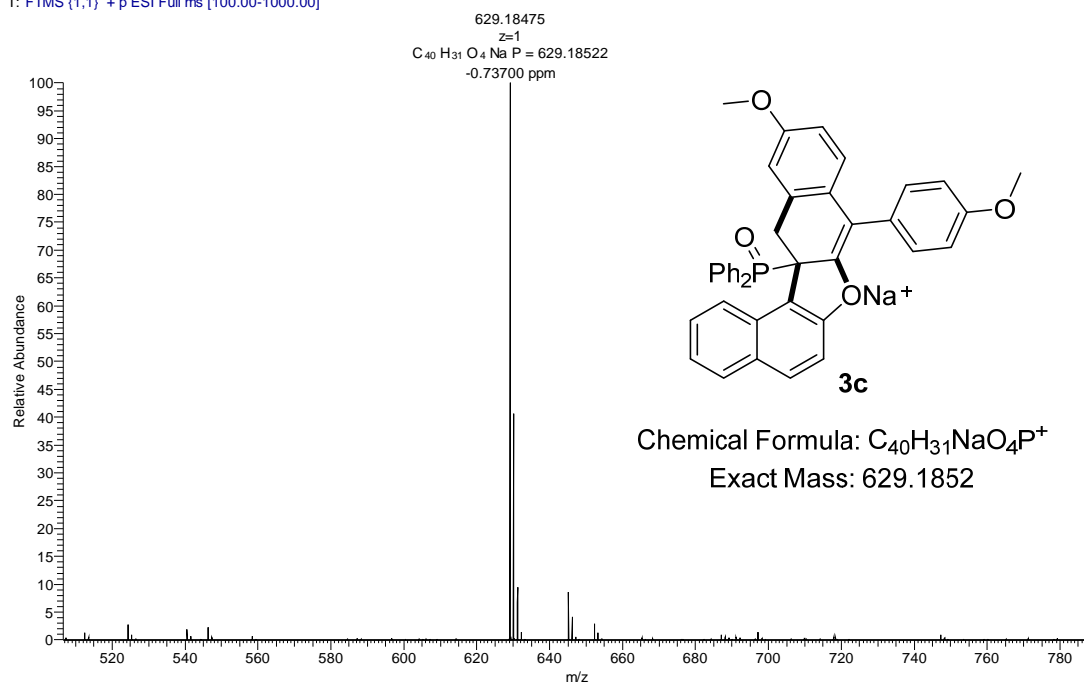

HRMS of **3c**

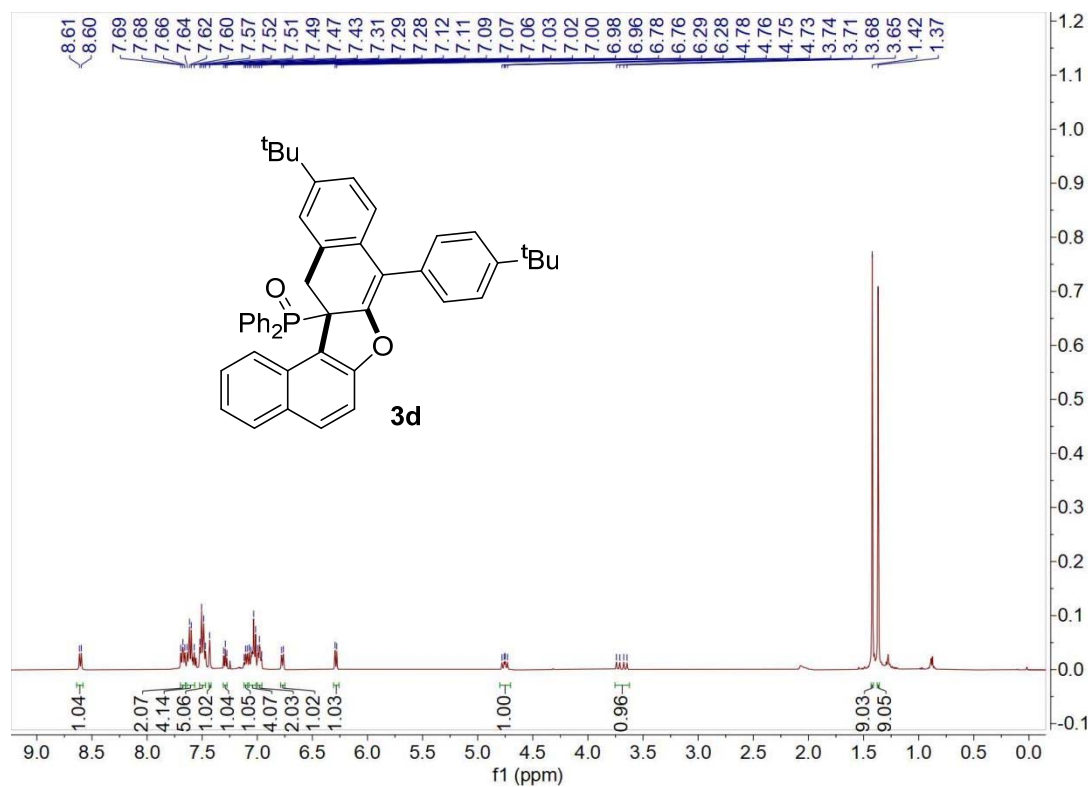

<sup>1</sup>H-NMR (500 MHz, CDCl<sub>3</sub>) of **3d**



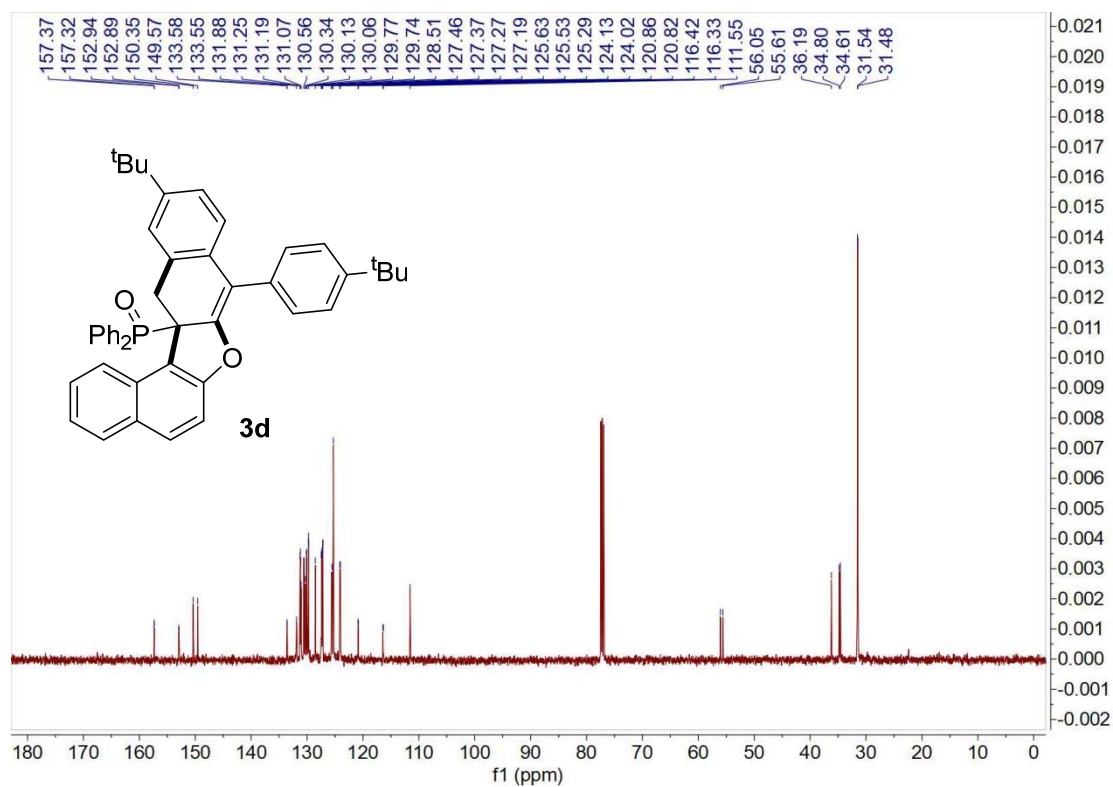

$^{13}\text{C}$ -NMR (126 MHz,  $\text{CDCl}_3$ ) of **3d**

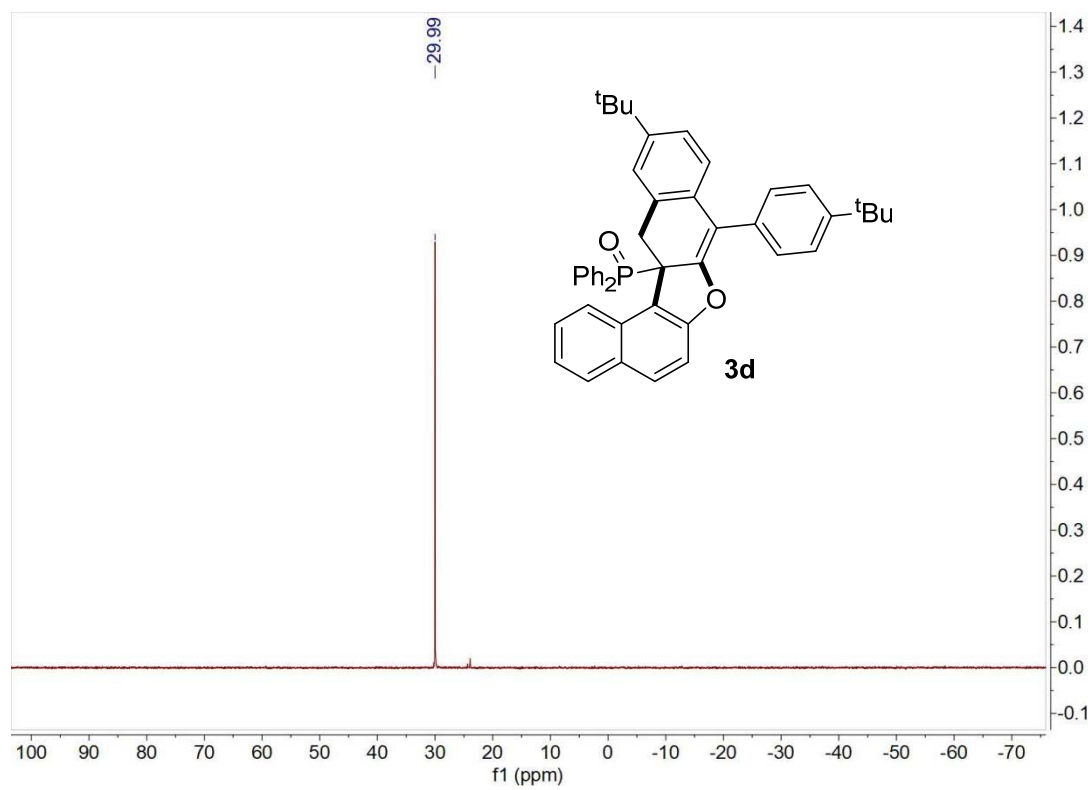

$^{31}\text{P}$ -NMR (202 MHz,  $\text{CDCl}_3$ ) of **3d**

20210515-18\_210517102502 #41 RT: 0.54 AV: 1 NL: 2.24E4  
T: FTMS (1,1) + p ESI Full ms [100.00-1000.00]

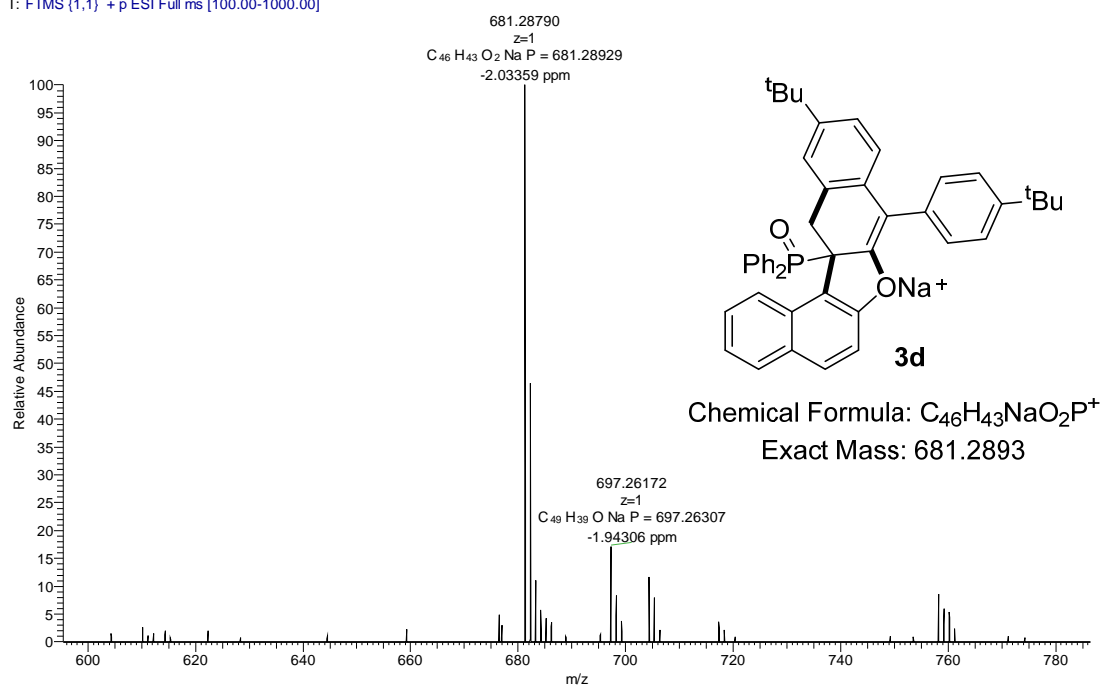

HRMS of **3d**

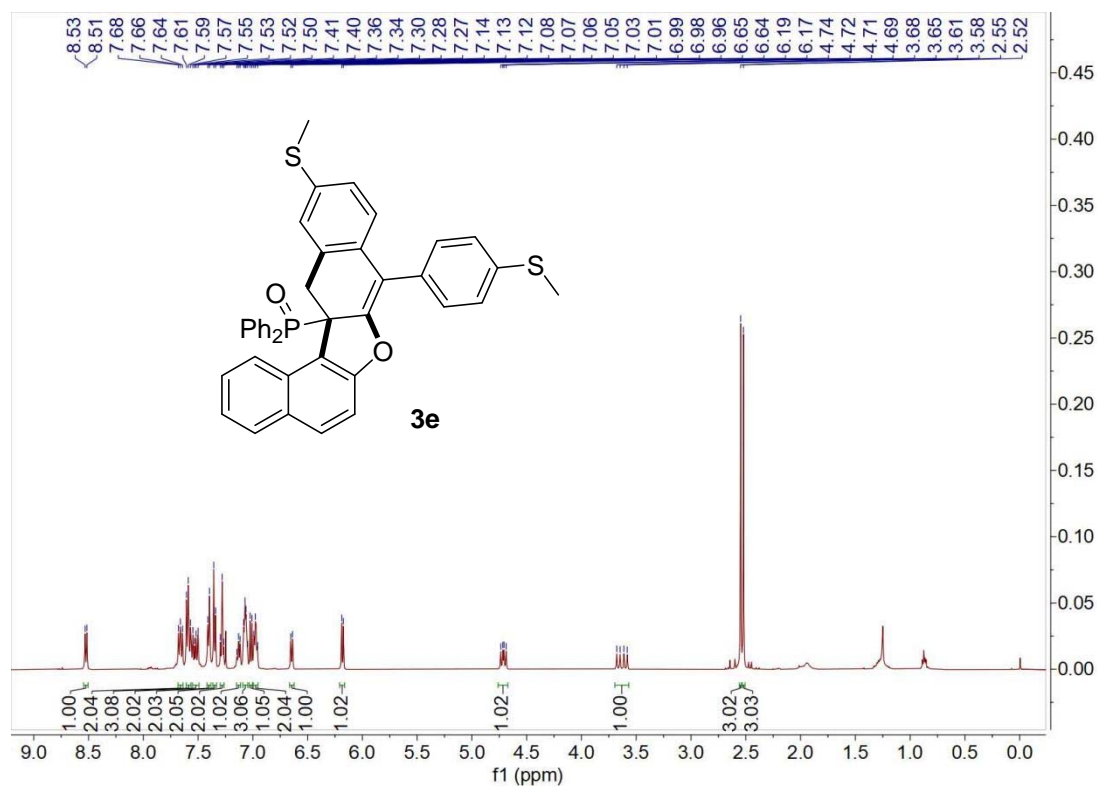

<sup>1</sup>H-NMR (500 MHz, CDCl<sub>3</sub>) of **3e**

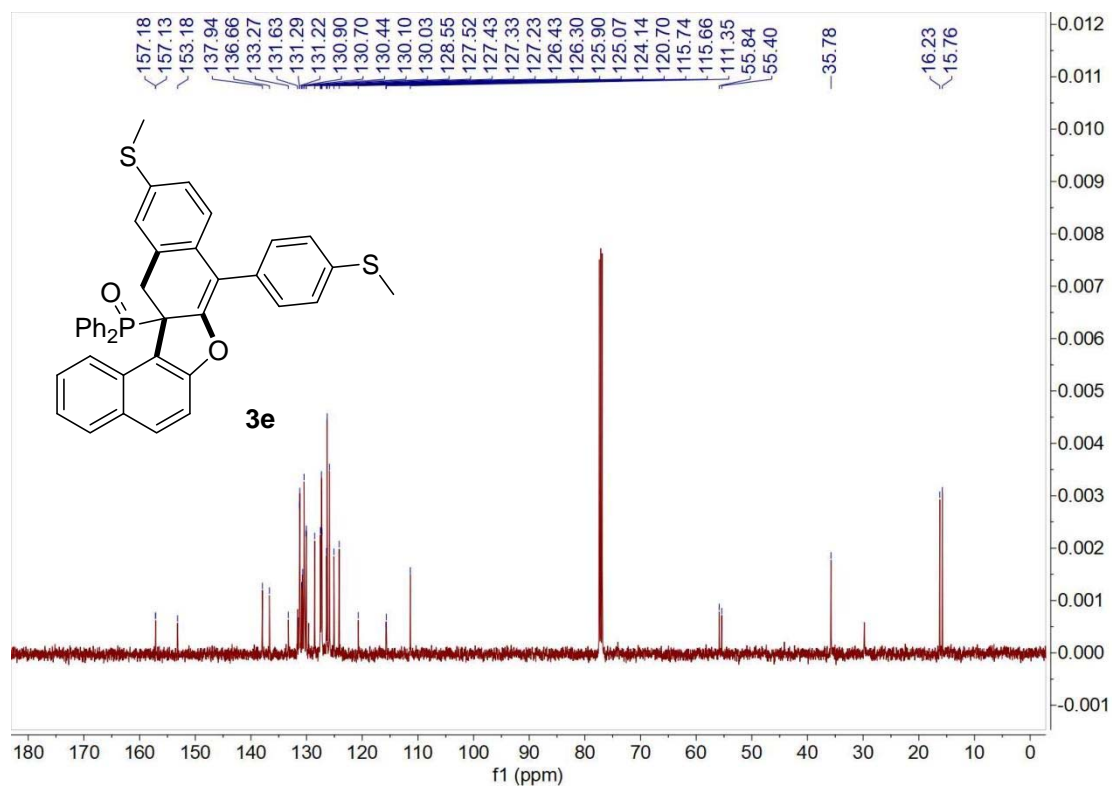

$^{13}\text{C}$ -NMR (126 MHz,  $\text{CDCl}_3$ ) of **3e**

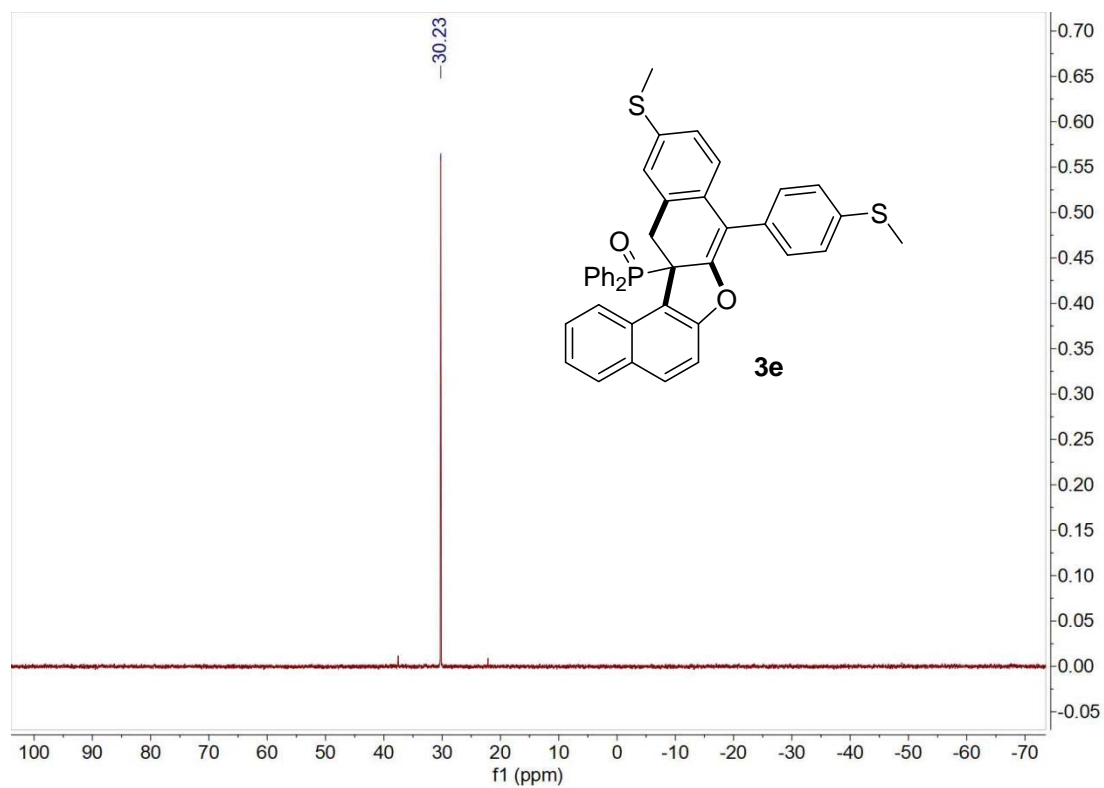

$^{31}\text{P}$ -NMR (202 MHz,  $\text{CDCl}_3$ ) of **3e**

20210719-22 #25 RT: 0.31 AV: 1 NL: 4.37E5  
T: FTMS (1,1) + p ESI Full ms [100.00-1000.00]

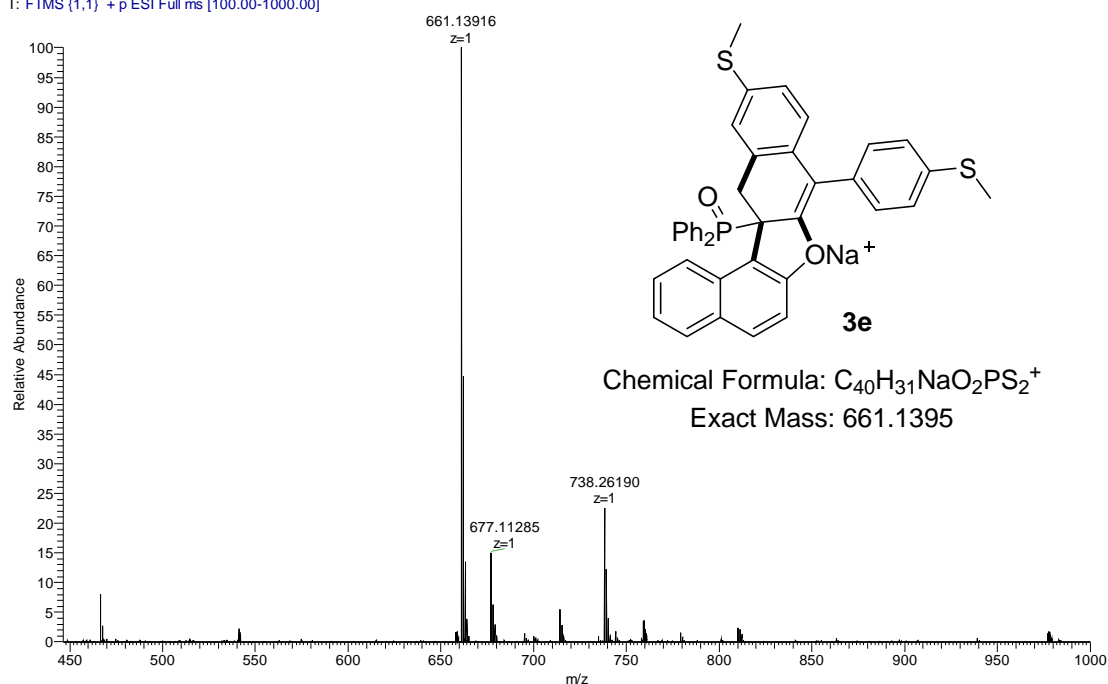

HRMS of **3e**

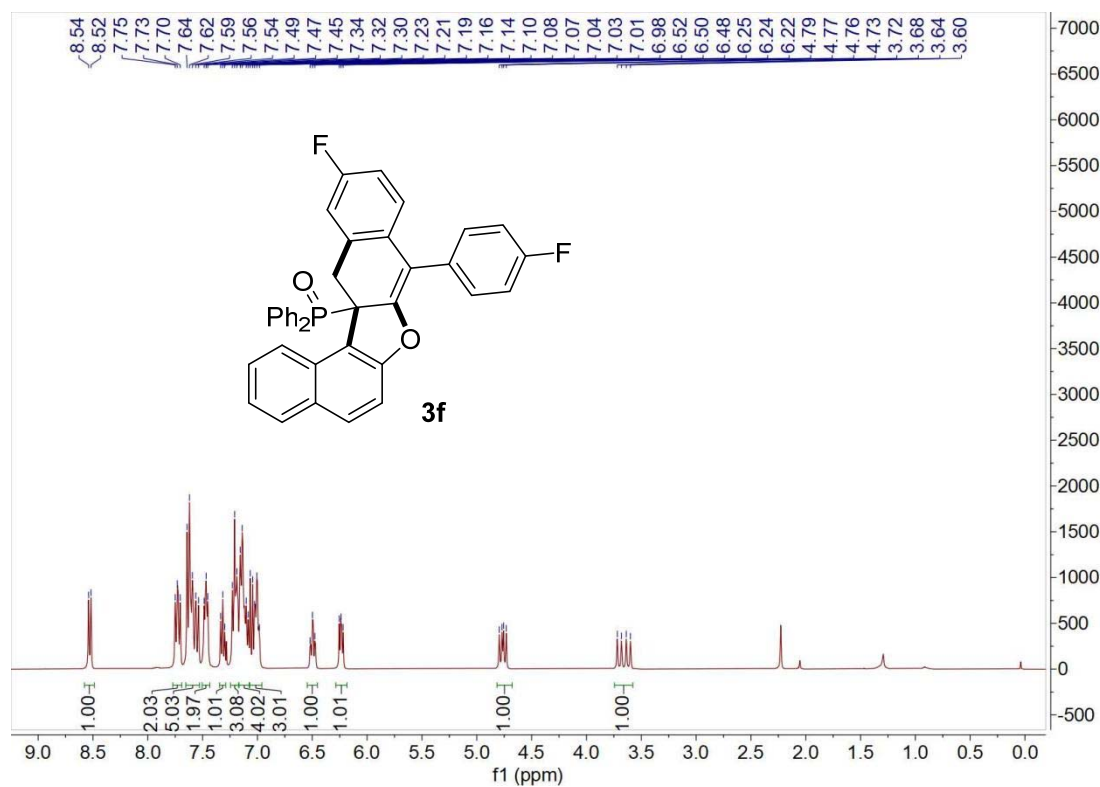

<sup>1</sup>H-NMR (400 MHz, CDCl<sub>3</sub>) of **3f**

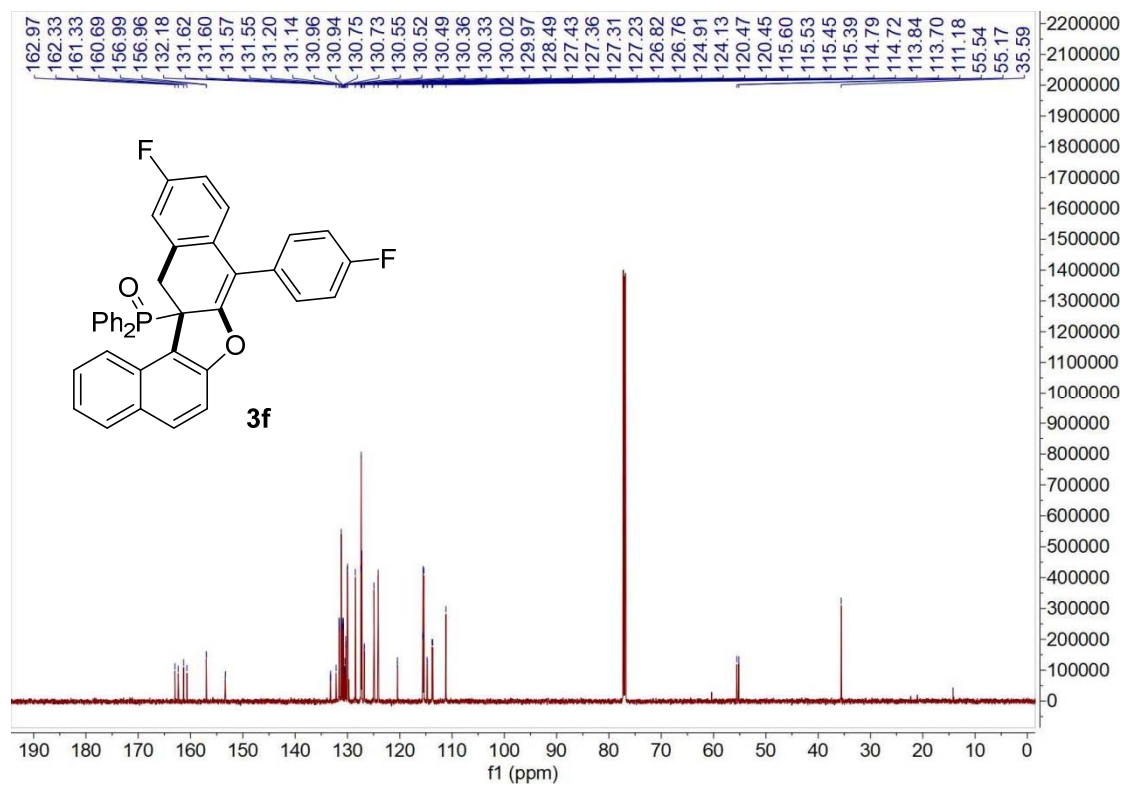

$^{13}\text{C}$ -NMR (151 MHz,  $\text{CDCl}_3$ ) of **3f**

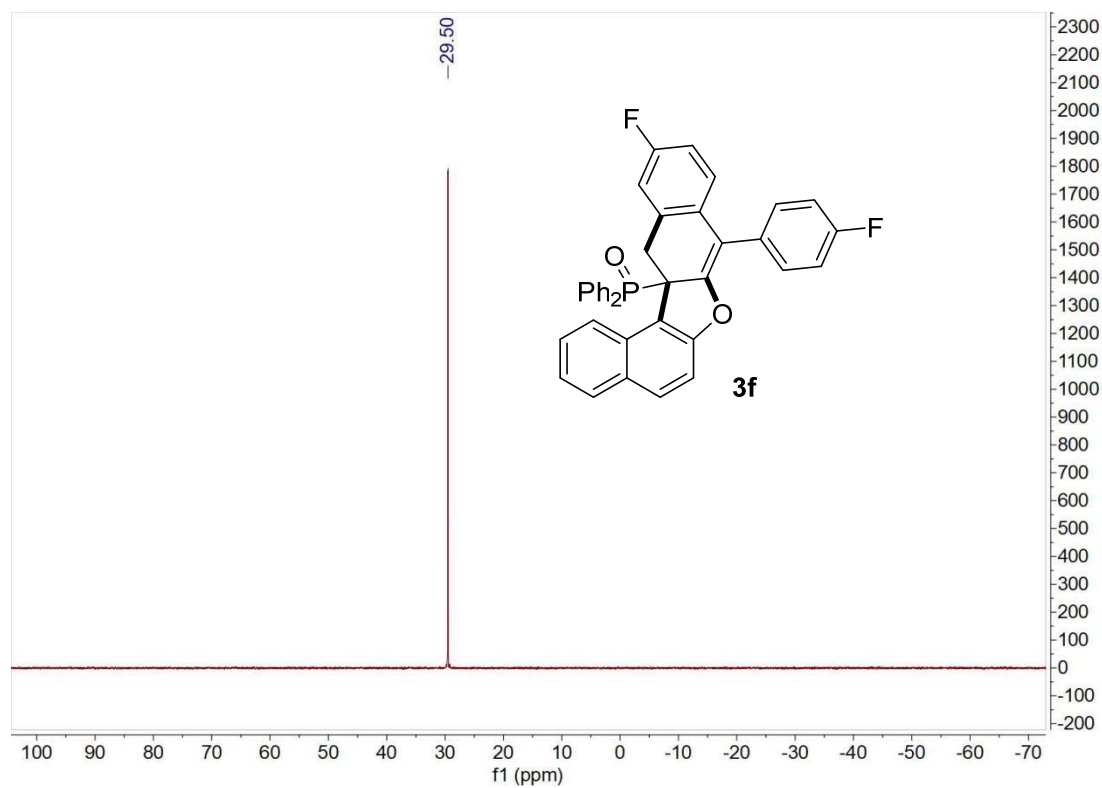

$^{31}\text{P}$ -NMR (162 MHz,  $\text{CDCl}_3$ ) of **3f**

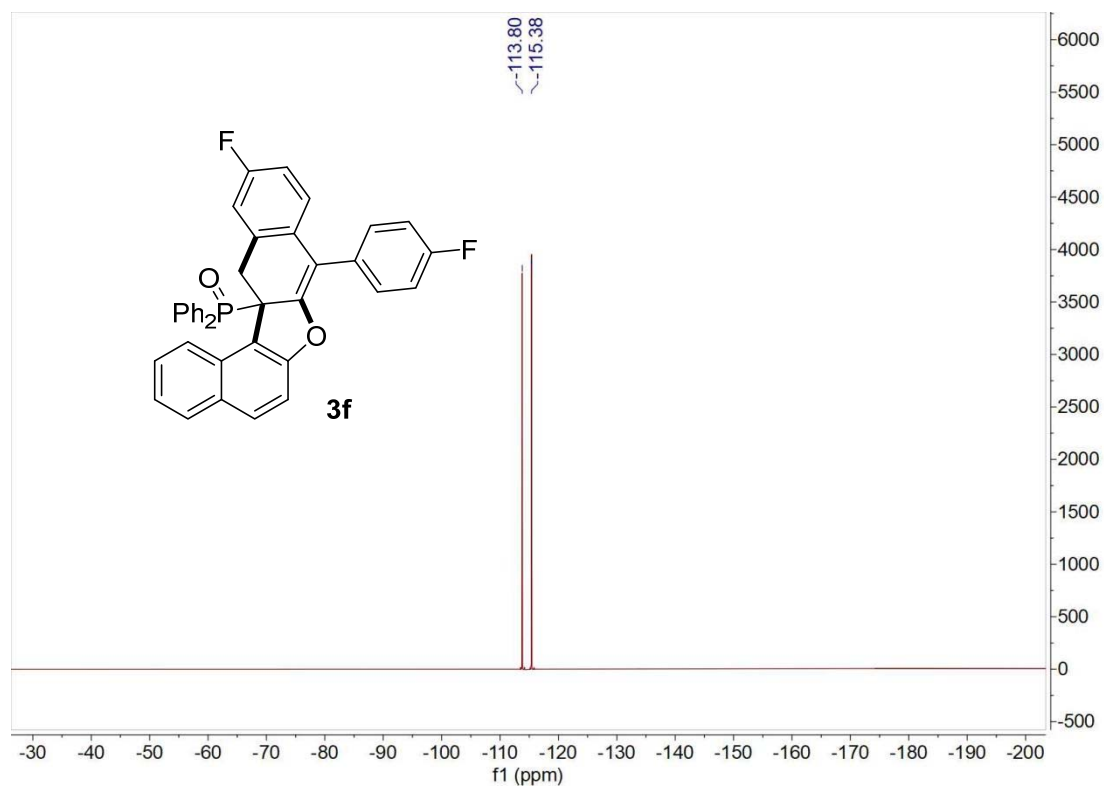

$^{19}\text{F}$ -NMR (376 MHz,  $\text{CDCl}_3$ ) of **3f**

20210515-25 #25 RT: 0.39 AV: 1 NL: 1.70E5  
T: FTMS (1,1) + p ESI Full ms [100.00-1000.00]

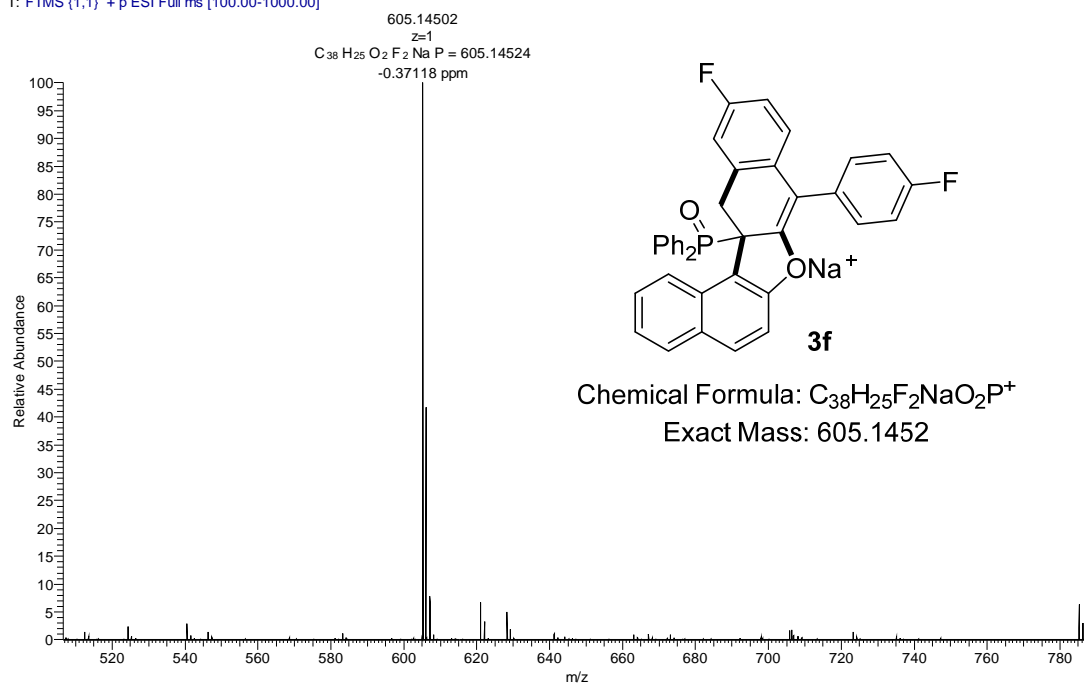

HRMS of **3f**

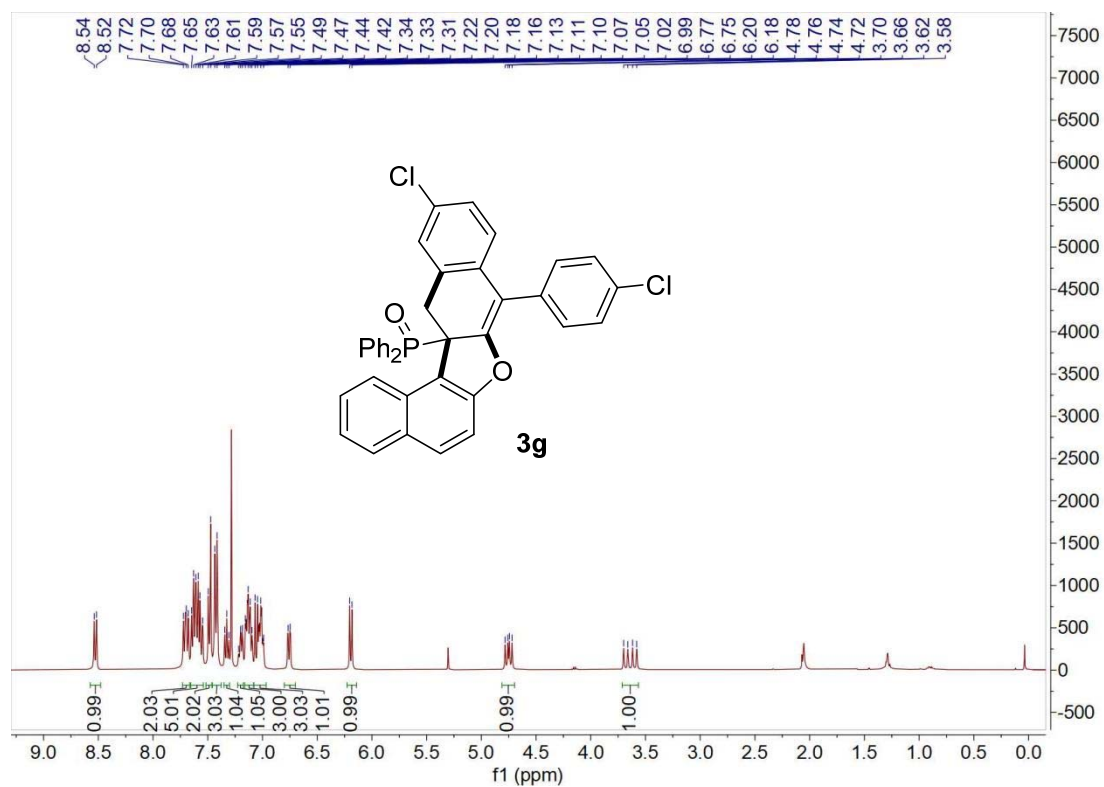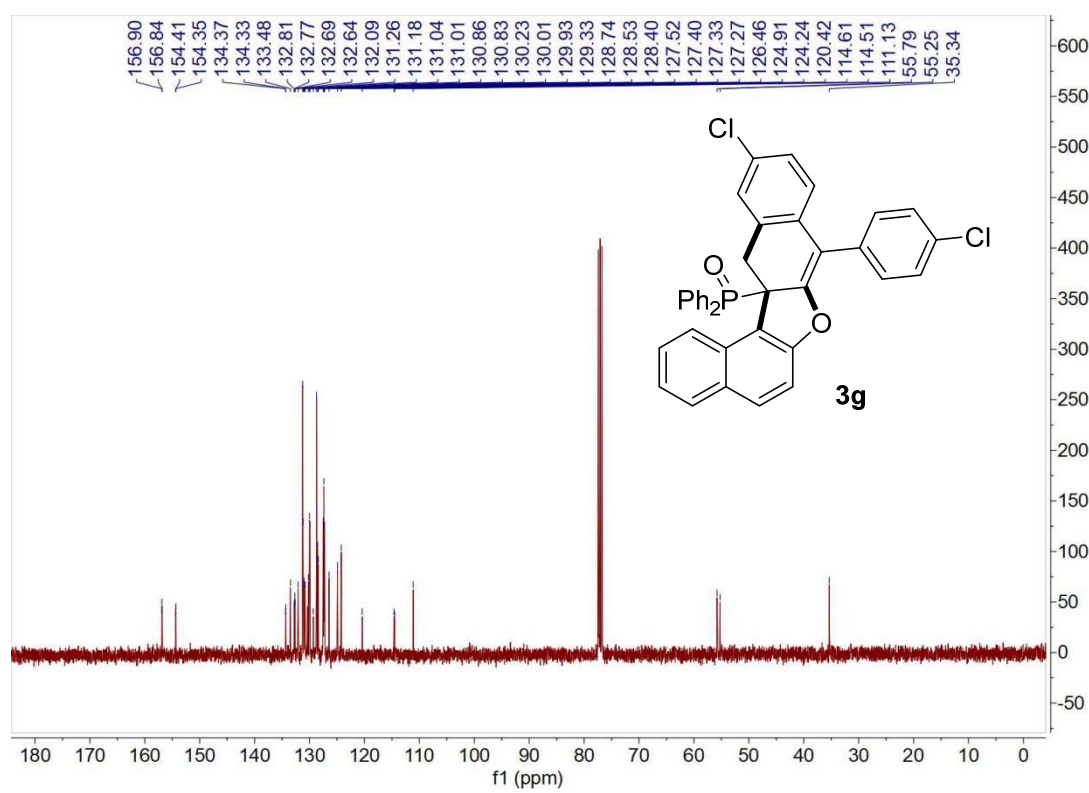

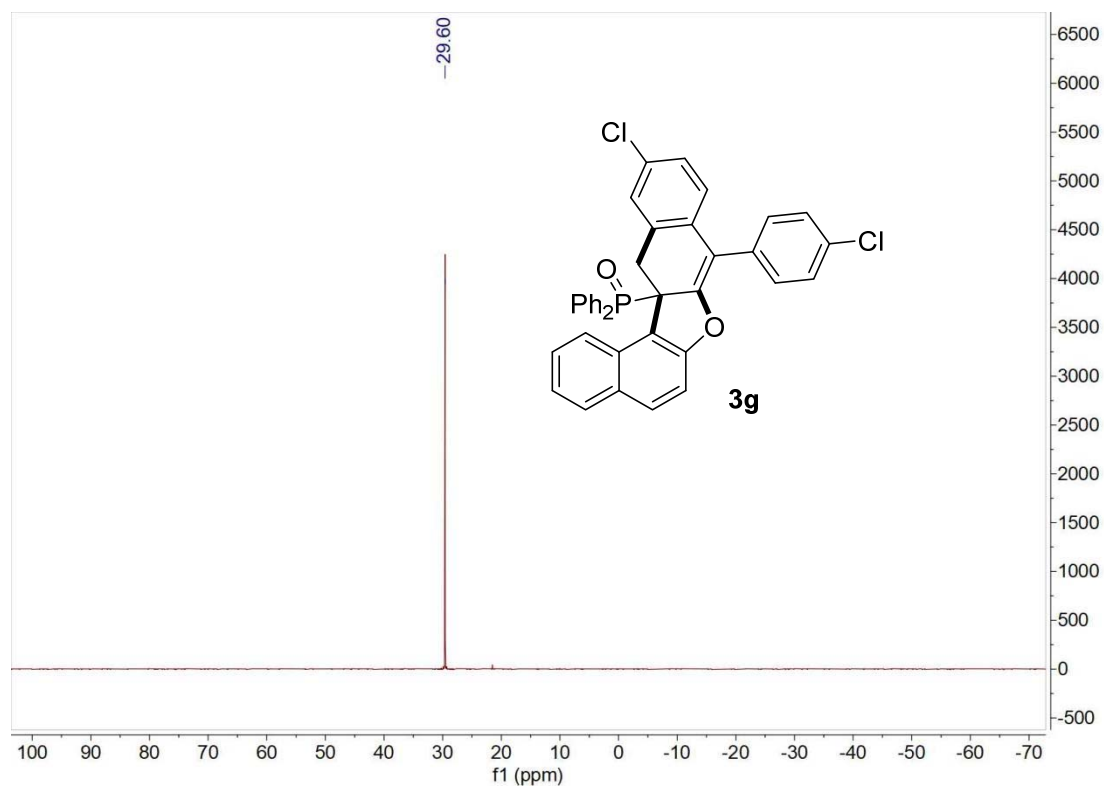

$^{31}\text{P}$ -NMR (162 MHz,  $\text{CDCl}_3$ ) of **3g**

Spectrum from 05.wiff (sample 1) - Sample011, Exp...t 1, +TOF MS (80 - 1000) from 1.174 to 1.218 min

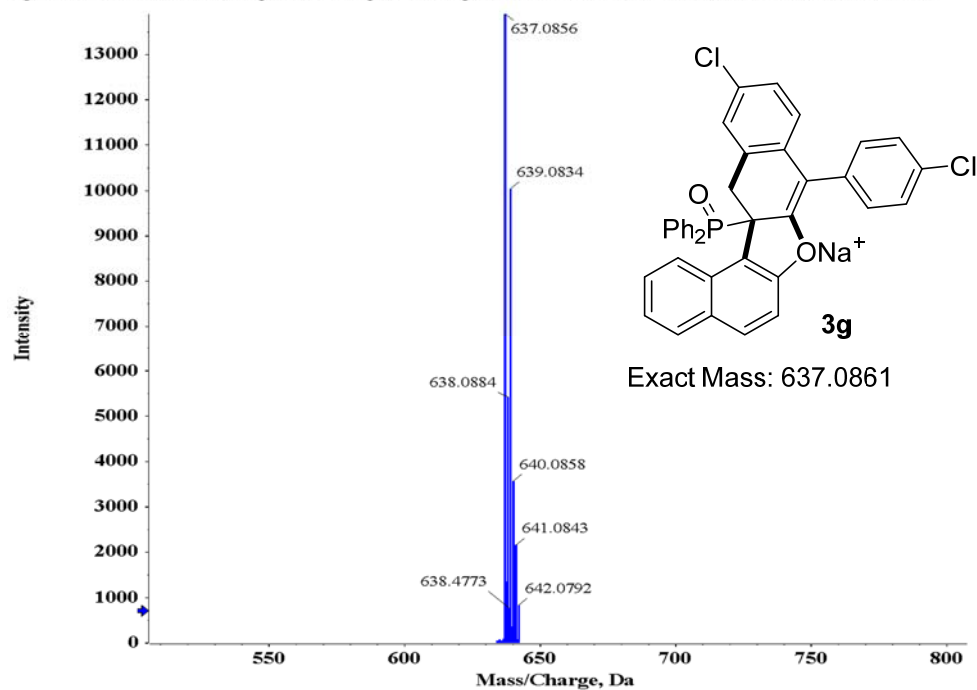

HRMS of **3g**



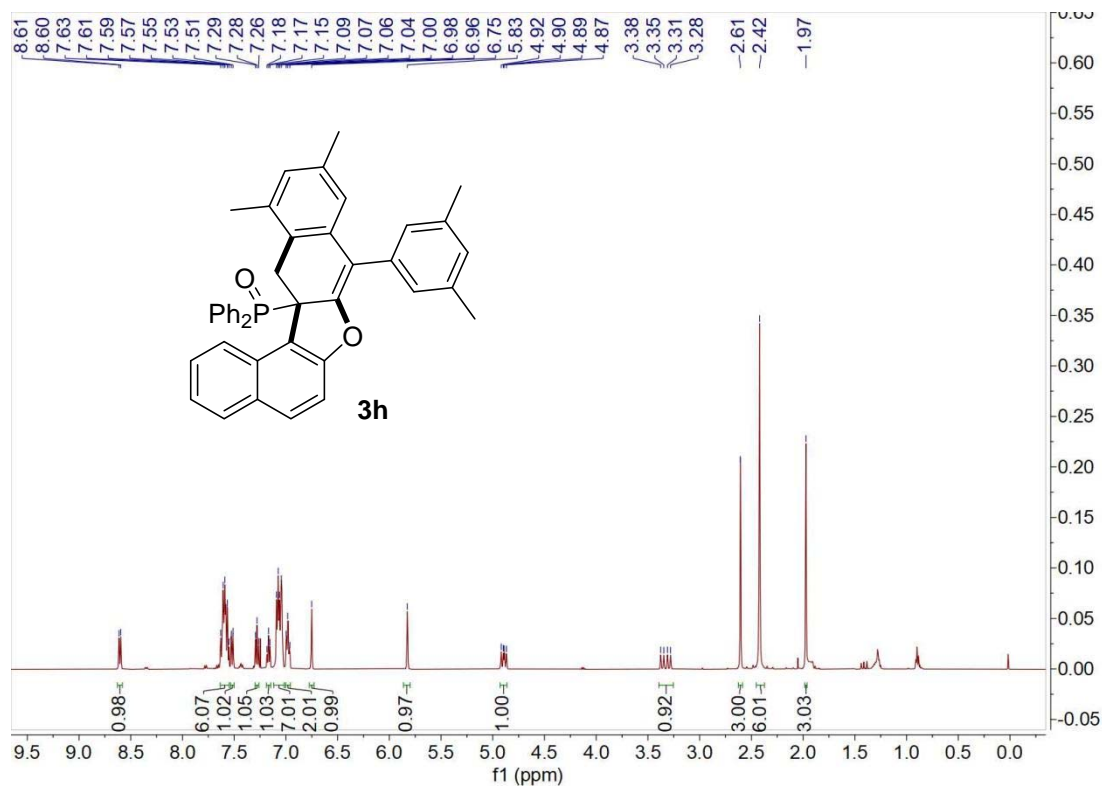

$^1\text{H-NMR}$  (500 MHz,  $\text{CDCl}_3$ ) of **3h**

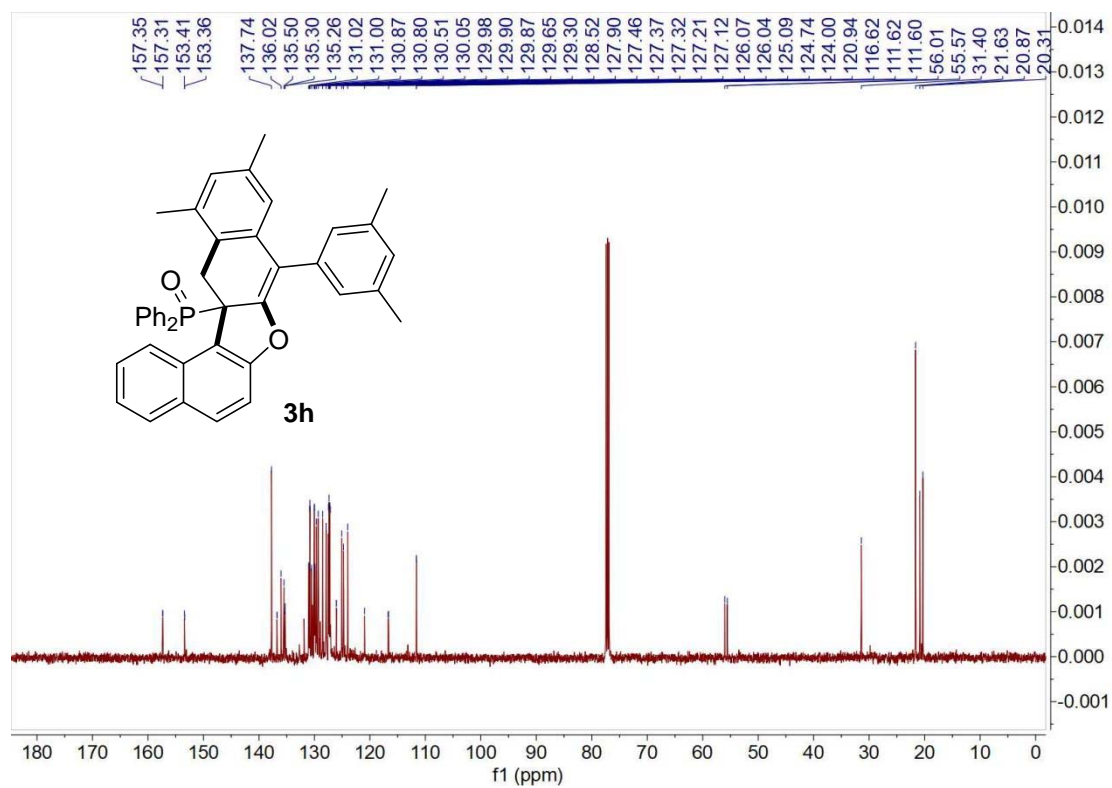

$^{13}\text{C-NMR}$  (126 MHz,  $\text{CDCl}_3$ ) of **3h**

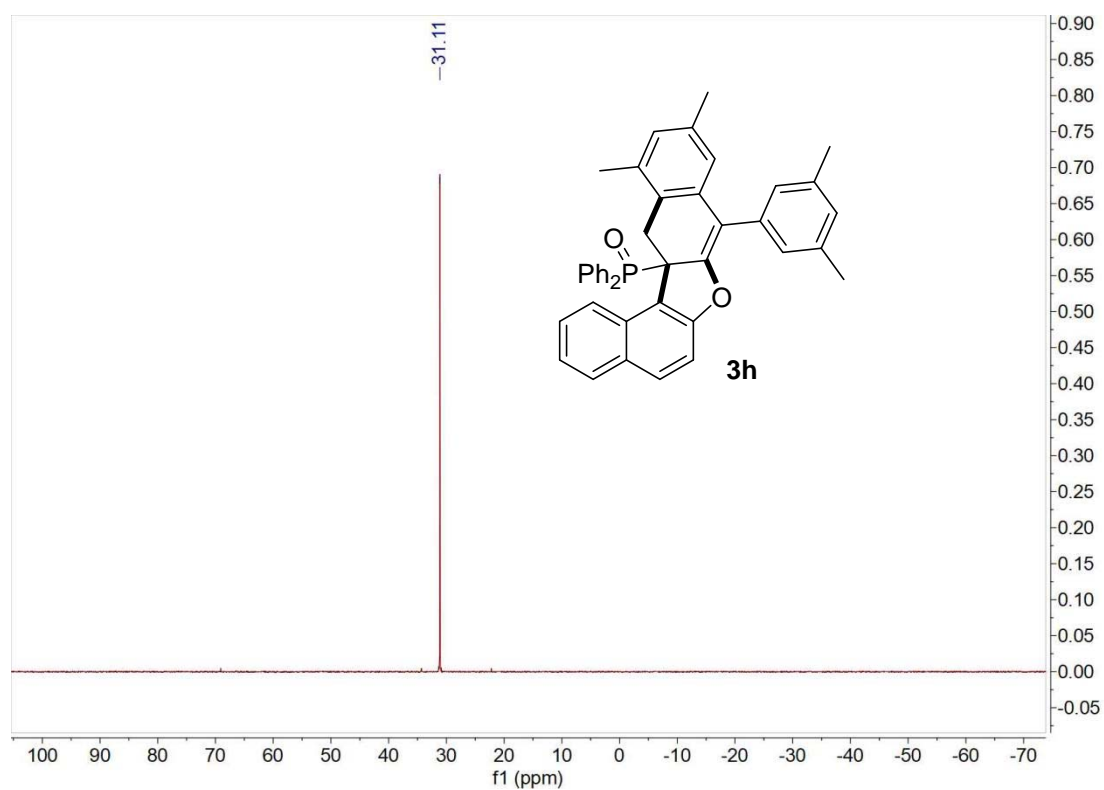

31P-NMR (202 MHz, CDCl<sub>3</sub>) of **3h**

20210609-21 #23 RT: 0.38 AV: 1 NL: 5.01E4  
T: FTMS (1,1) + p ESI Full ms [100.00-1000.00]

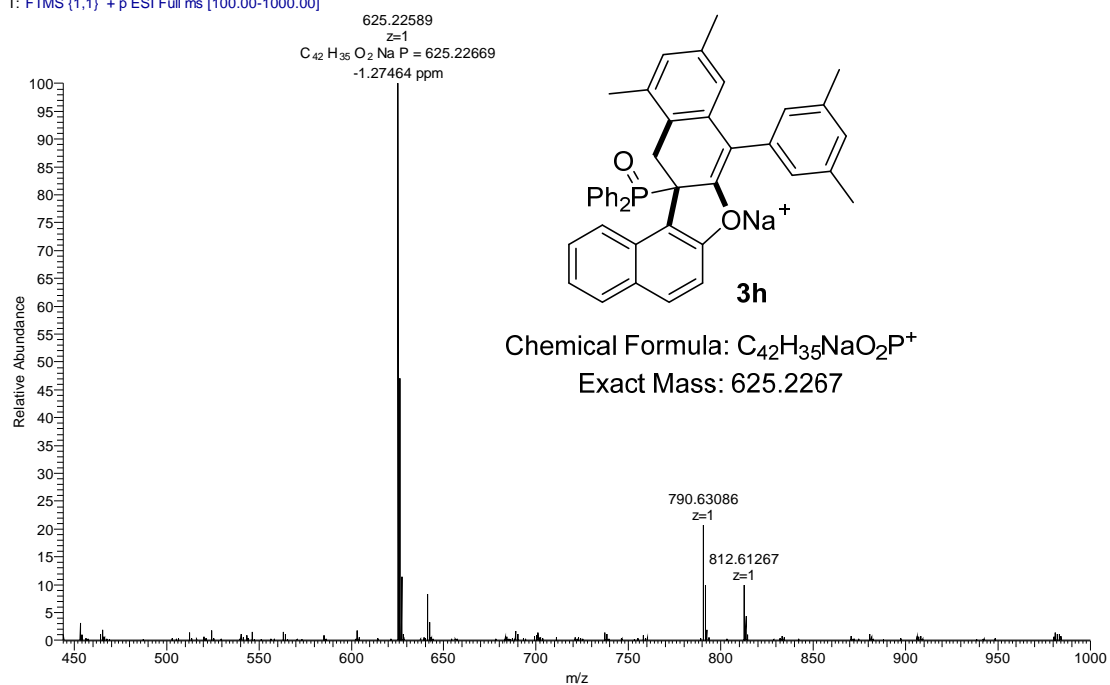

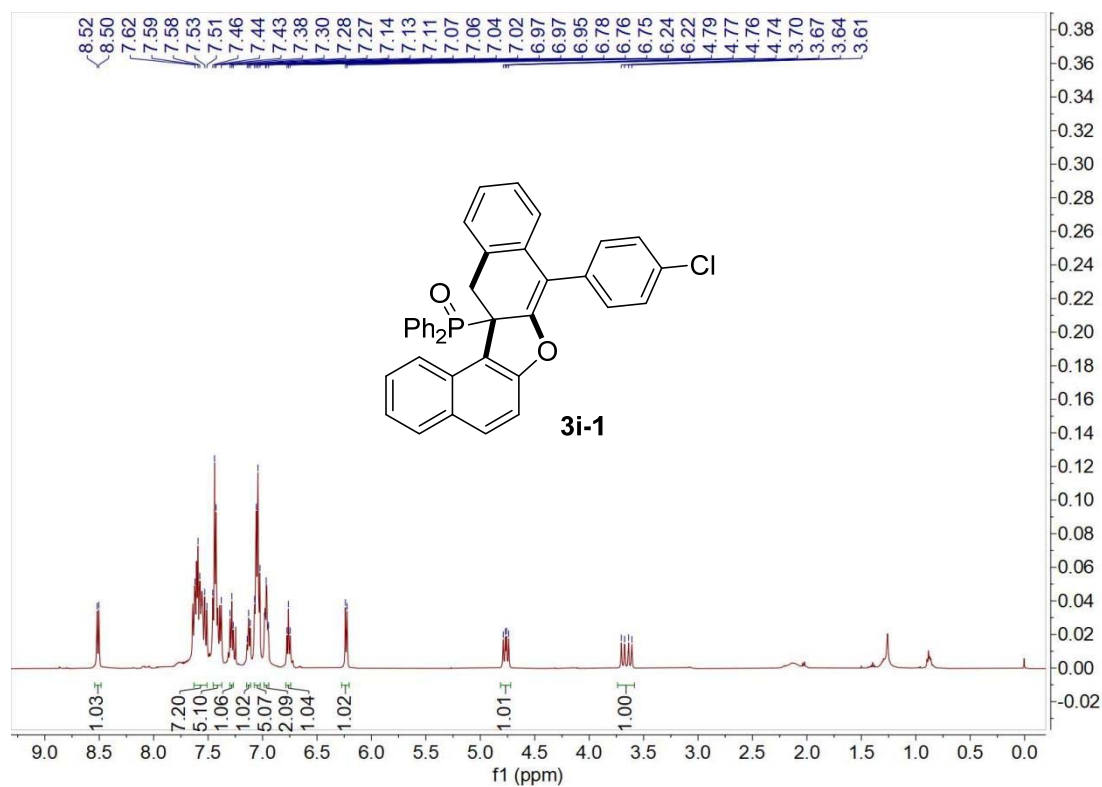

$^1\text{H-NMR}$  (500 MHz,  $\text{CDCl}_3$ ) of **3i-1**

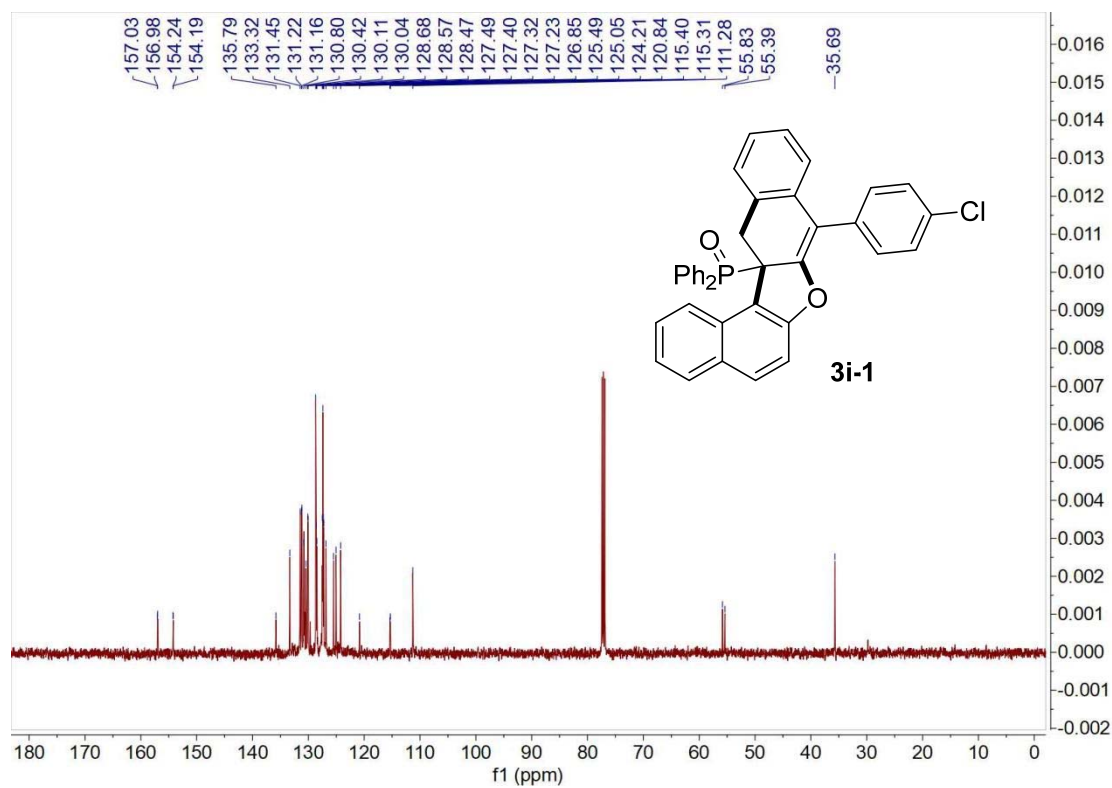

$^{13}\text{C-NMR}$  (126 MHz,  $\text{CDCl}_3$ ) of **3i-1**

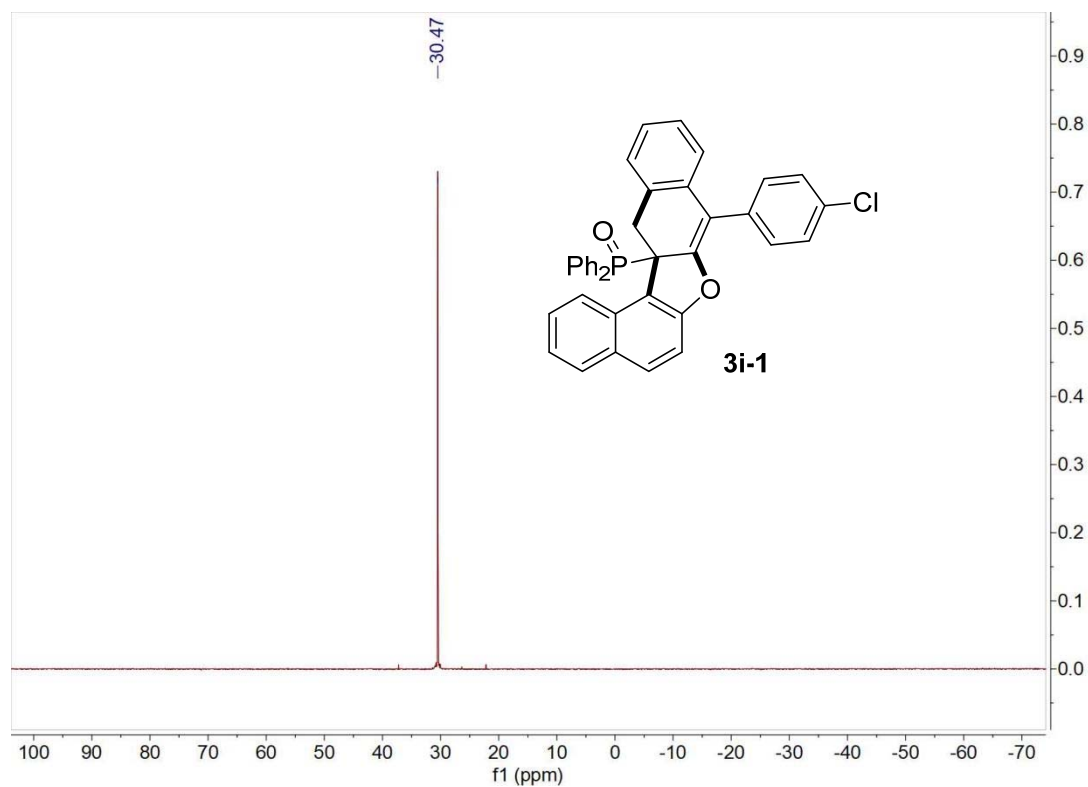

<sup>31</sup>P-NMR (202 MHz, CDCl<sub>3</sub>) of **3i-1**

20210609-20 #23 RT: 0.36 AV: 1 NL: 1.03E5  
T: FTMS (1,1) + p ESI Full ms [100.00-1000.00]

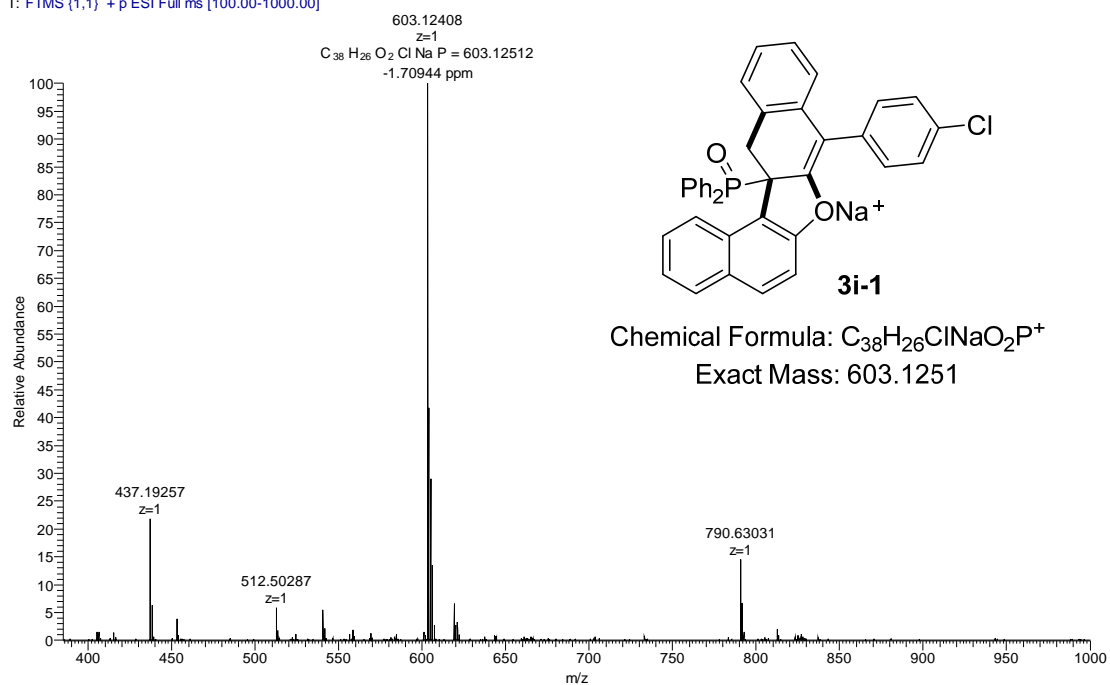

HRMS of **3i-1**

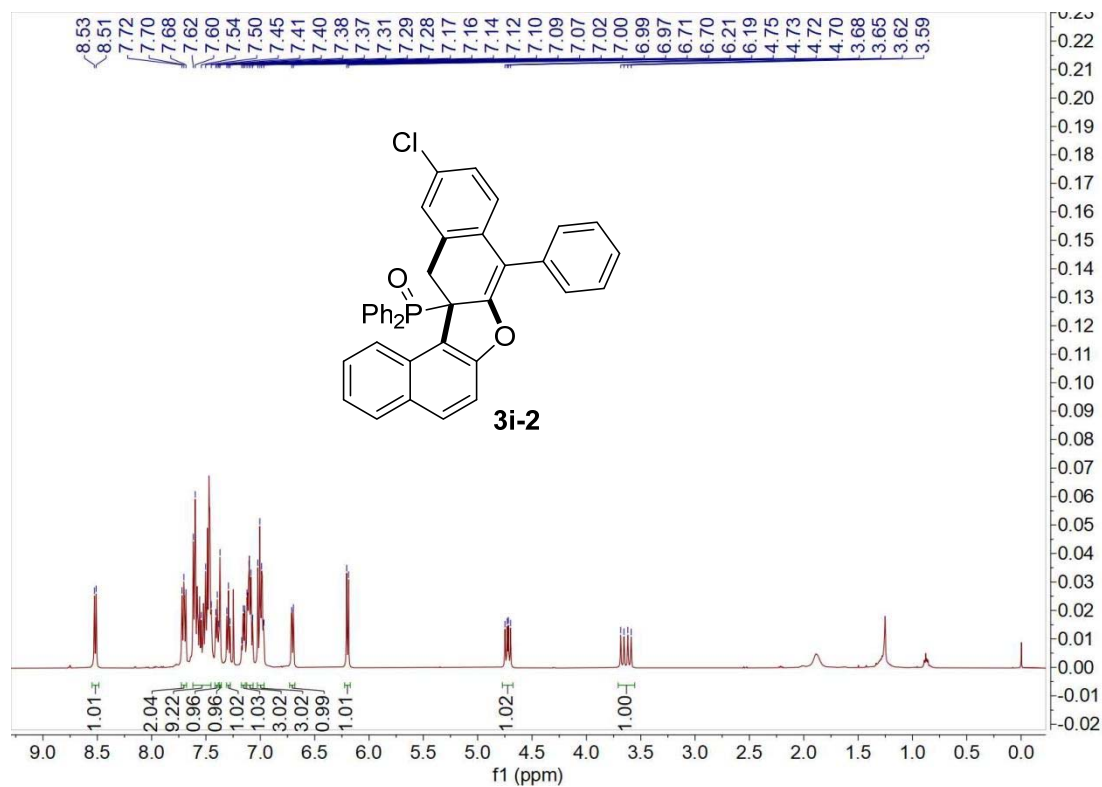

$^1\text{H-NMR}$  (500 MHz,  $\text{CDCl}_3$ ) of **3i-2**

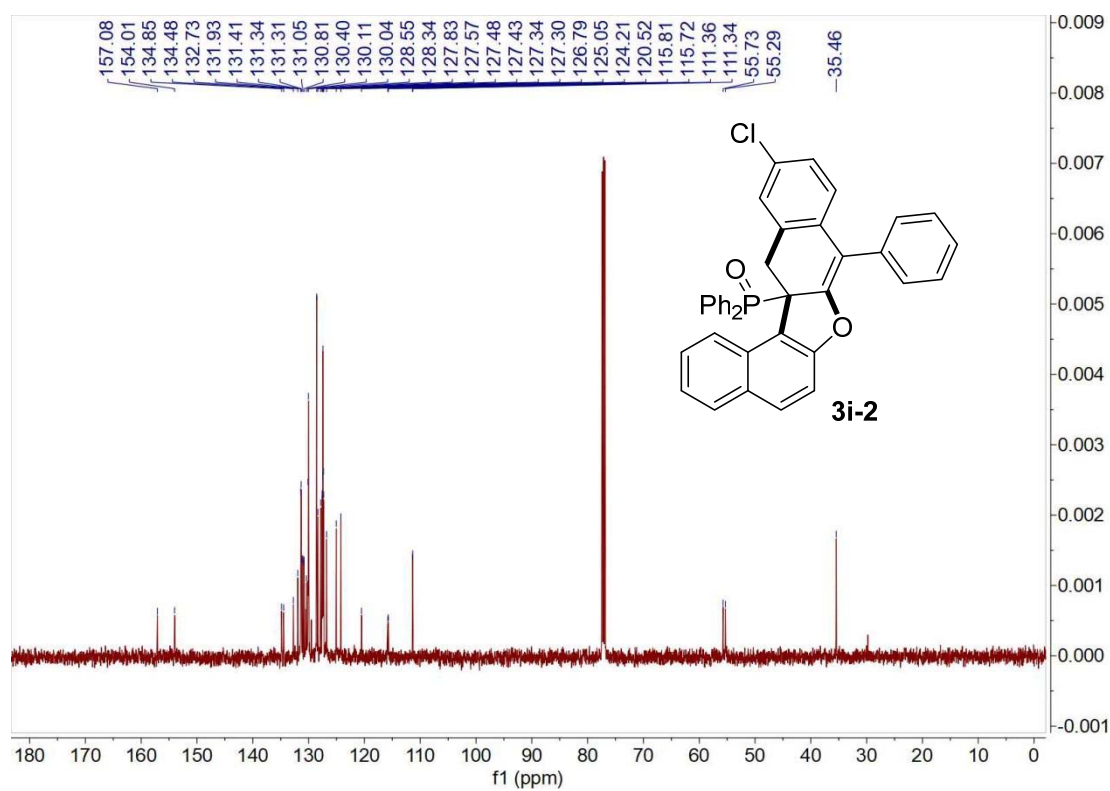

$^{13}\text{C-NMR}$  (126 MHz,  $\text{CDCl}_3$ ) of **3i-2**

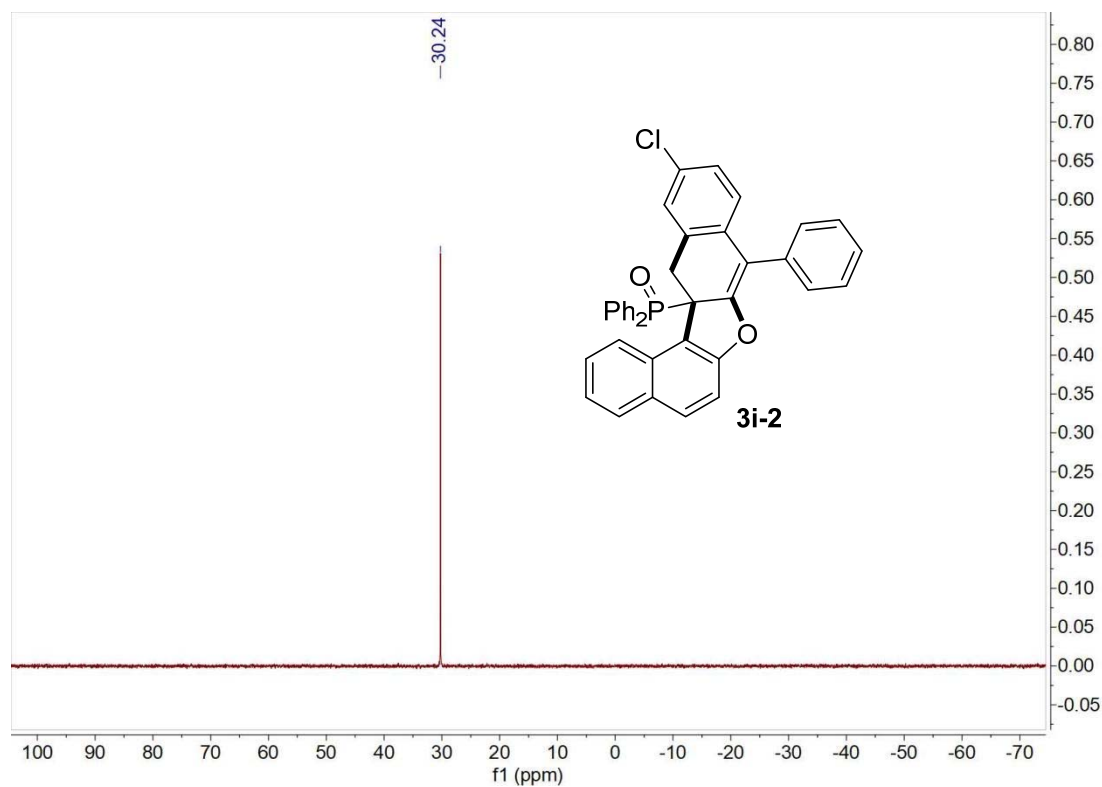

31P-NMR (202 MHz, CDCl<sub>3</sub>) of **3i-2**

20210609-19 #23 RT: 0.36 AV: 1 NL: 9.01E4  
T: FTMS (1,1) + p ESI Full ms [100.00-1000.00]

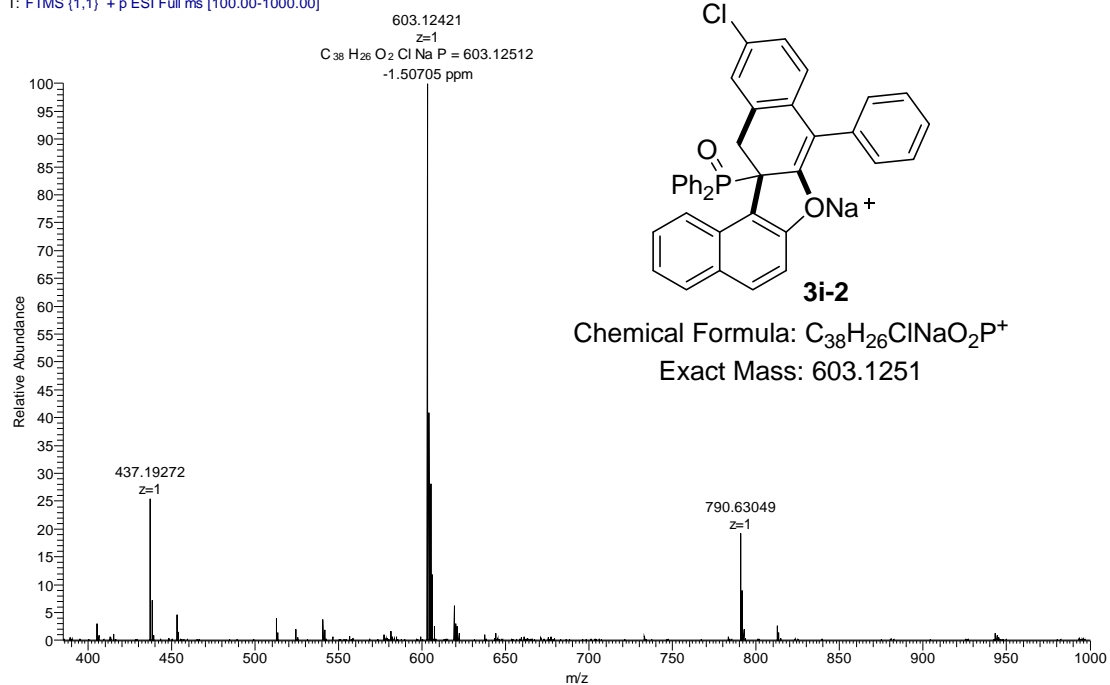

HRMS of **3i-2**

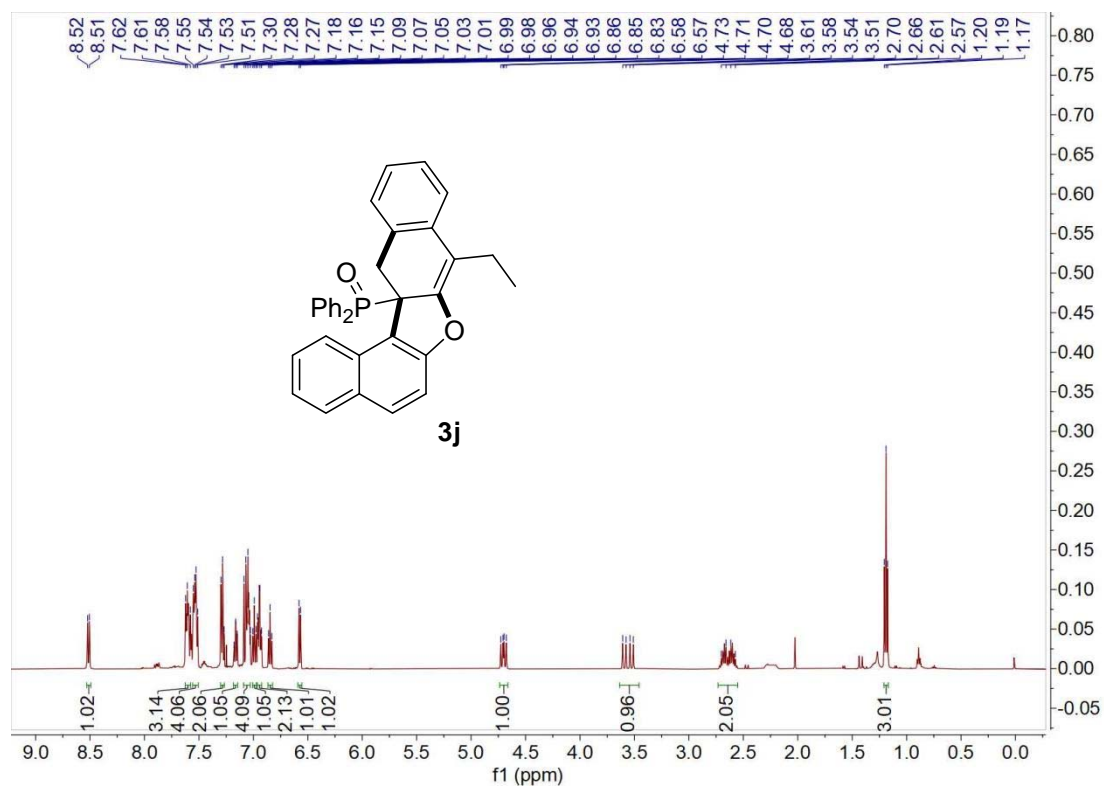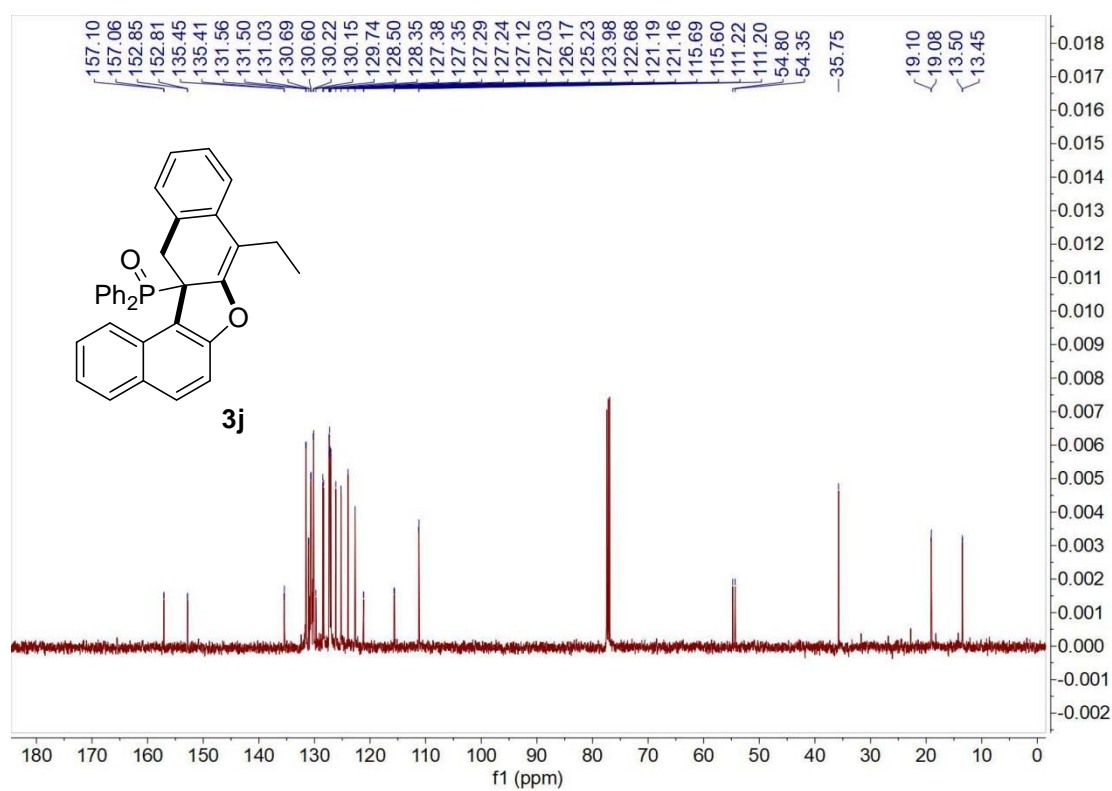

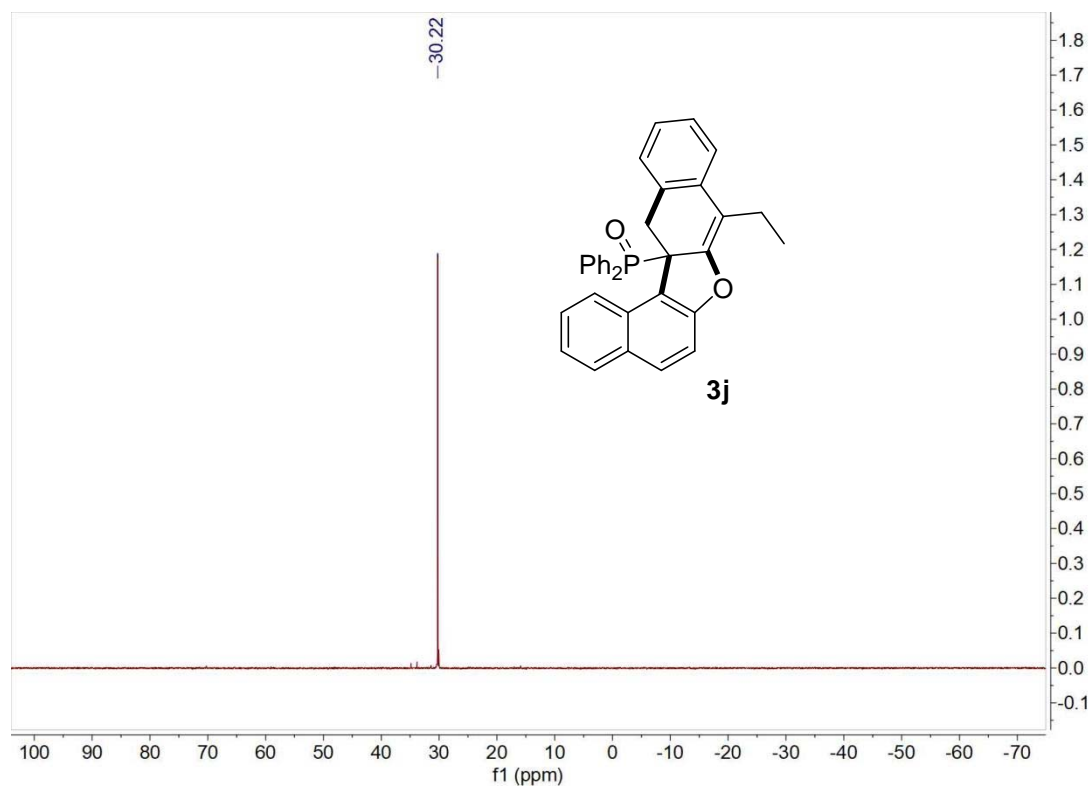

31P-NMR (202 MHz, CDCl<sub>3</sub>) of **3j**

Spectrum from 06.wiff (sample 1) - Sample012, Experiment 1, +TOF MS (80 - 1000) from 0.611 to 0.655 min

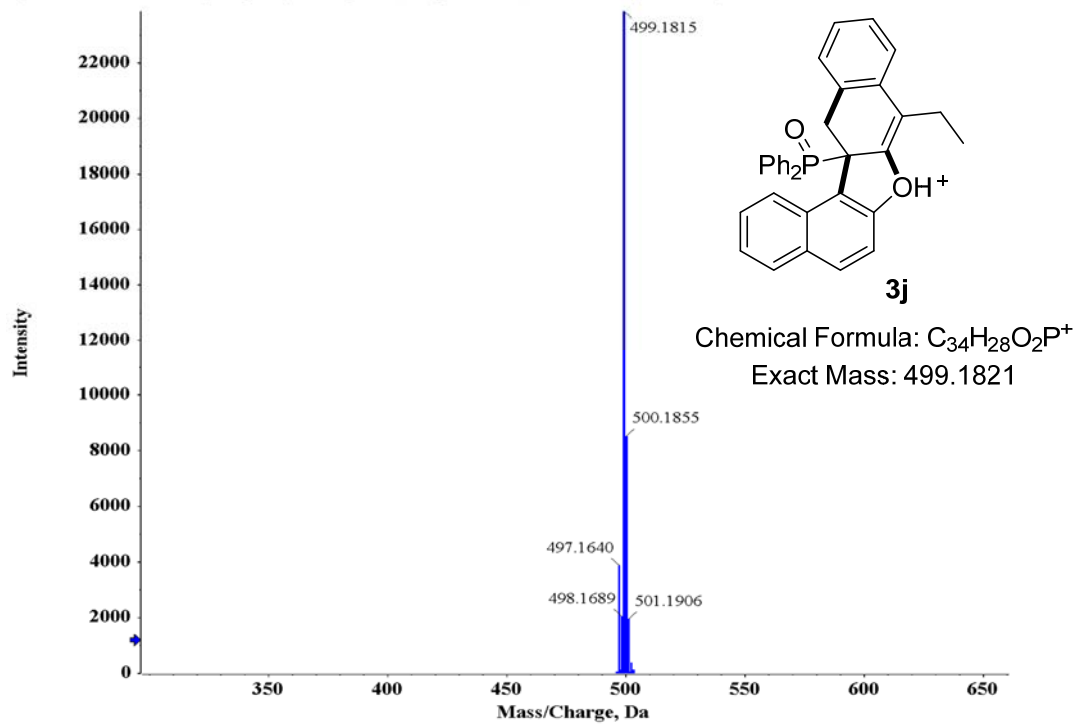

HRMS of **3j**



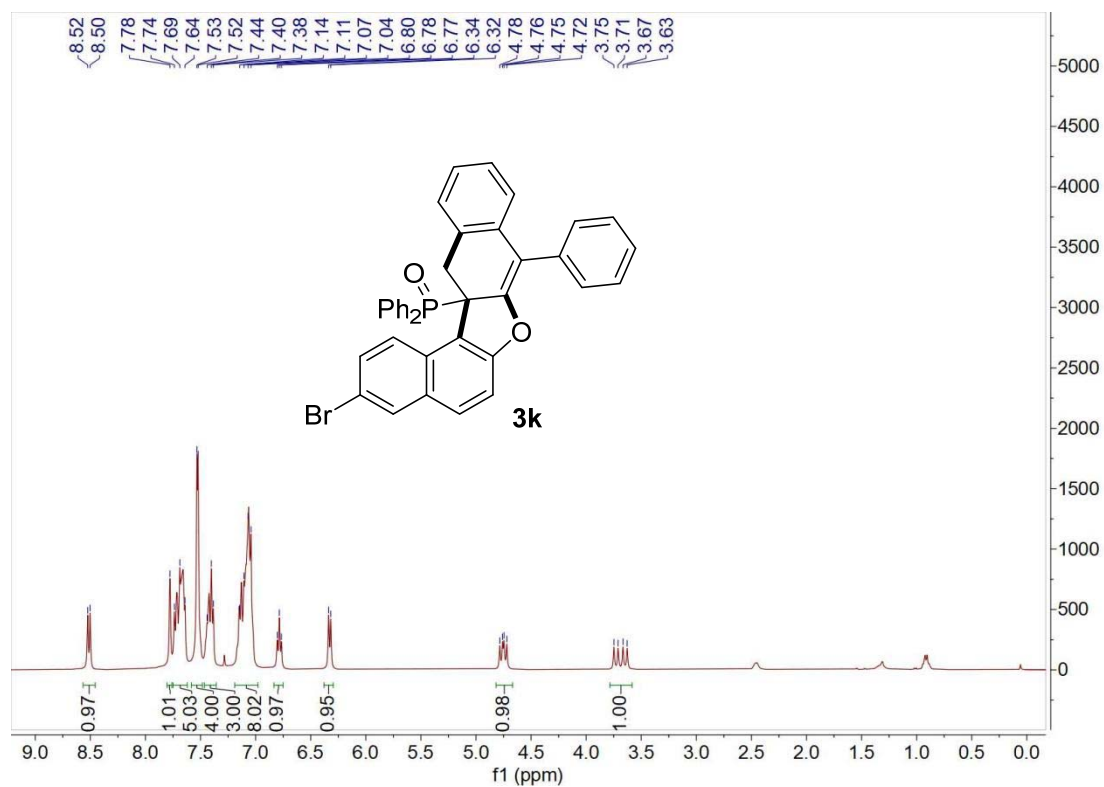

$^1\text{H-NMR}$  (400 MHz,  $\text{CDCl}_3$ ) of **3k**

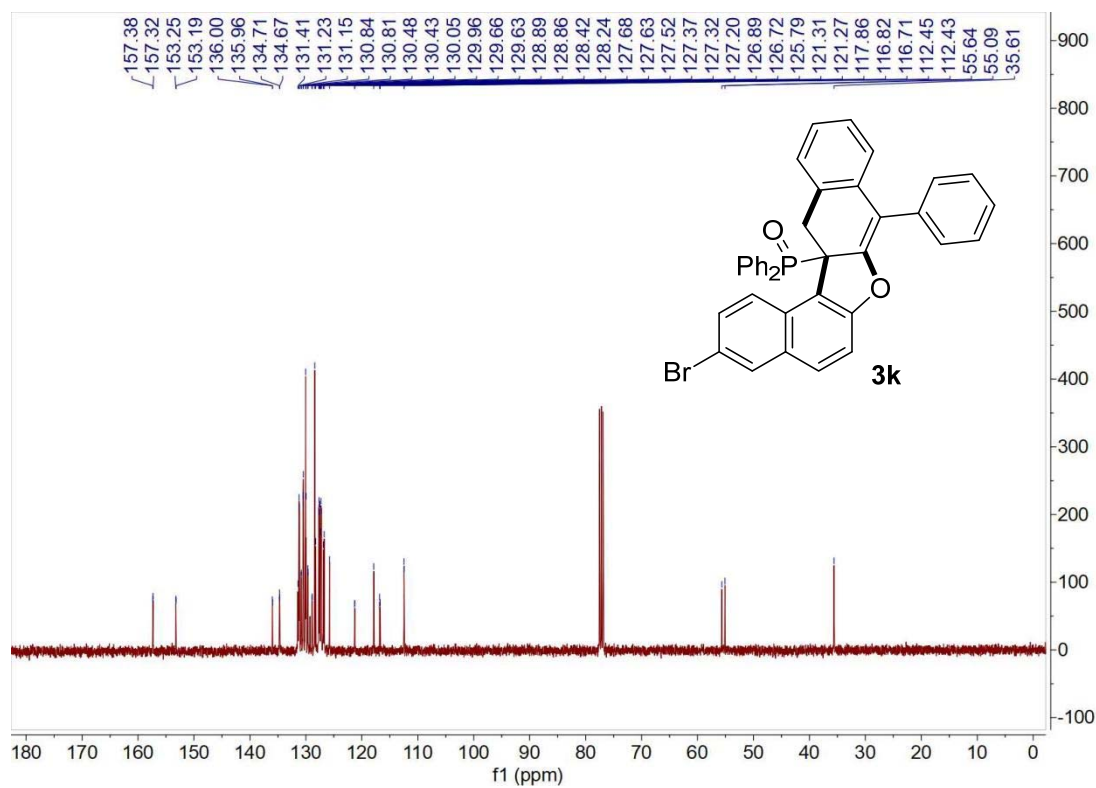

$^{13}\text{C-NMR}$  (101 MHz,  $\text{CDCl}_3$ ) of **3k**

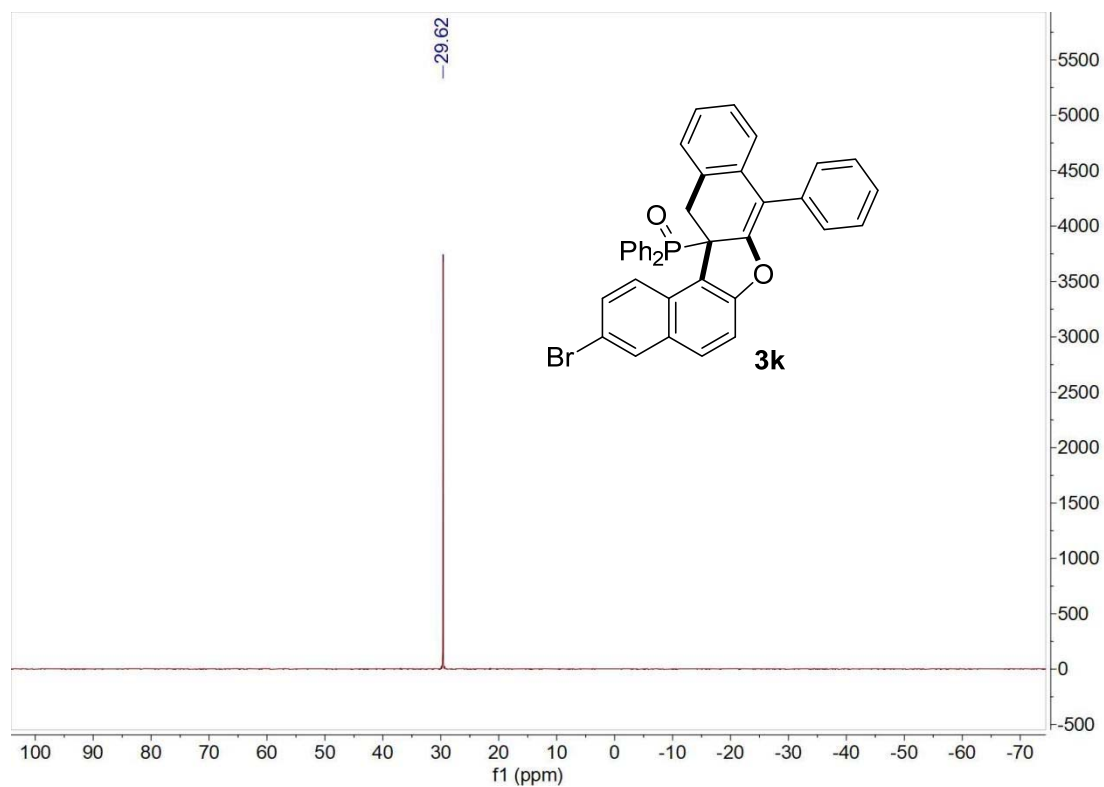

20210515-27 #21 RT: 0.34 AV: 1 NL: 6.70E4  
T: FTMS (1,1) + p ESI Full ms [100.00-1000.00]

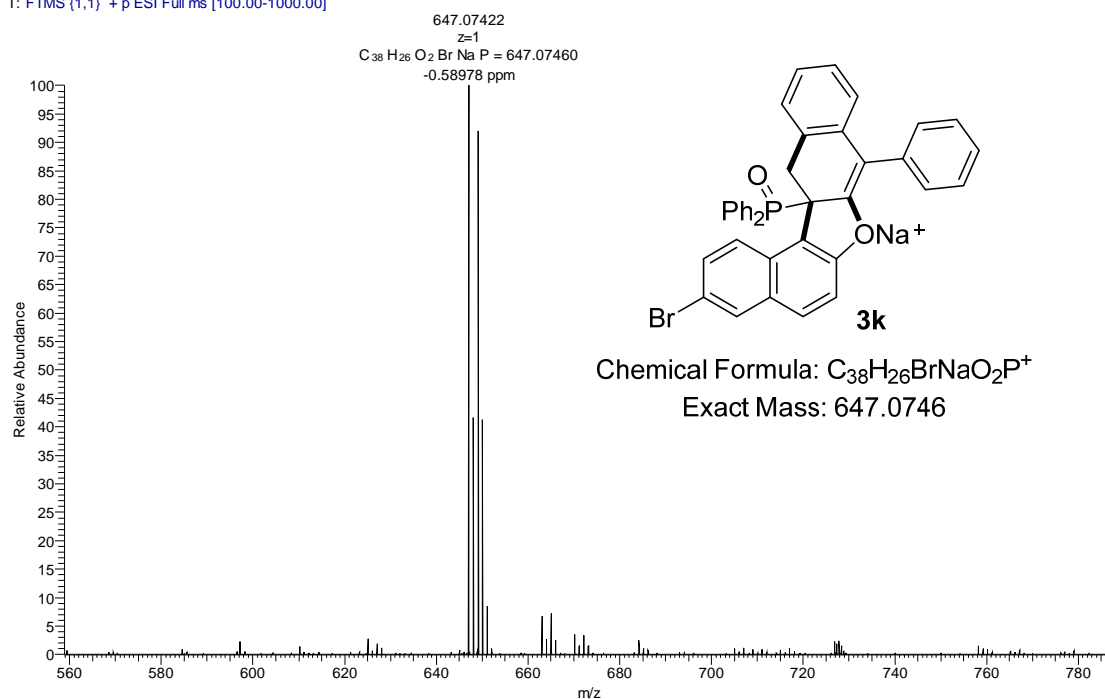

HRMS of **3k**

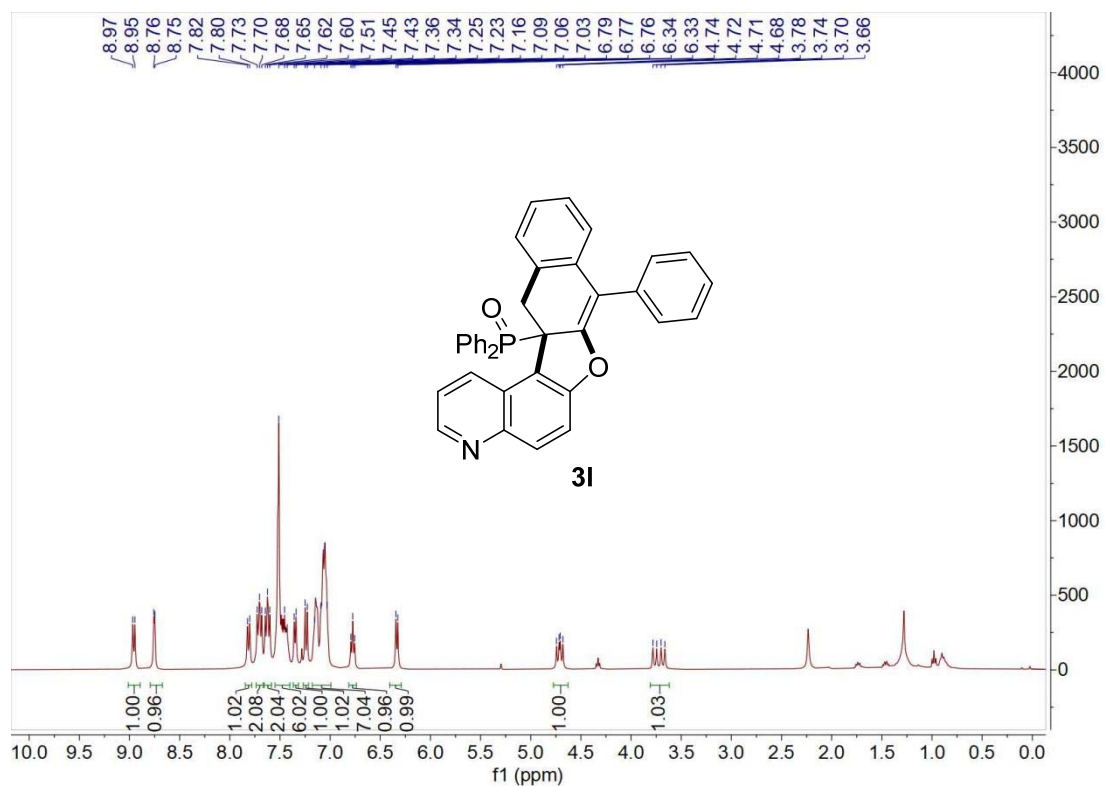

$^1\text{H-NMR}$  (400 MHz,  $\text{CDCl}_3$ ) of **3I**

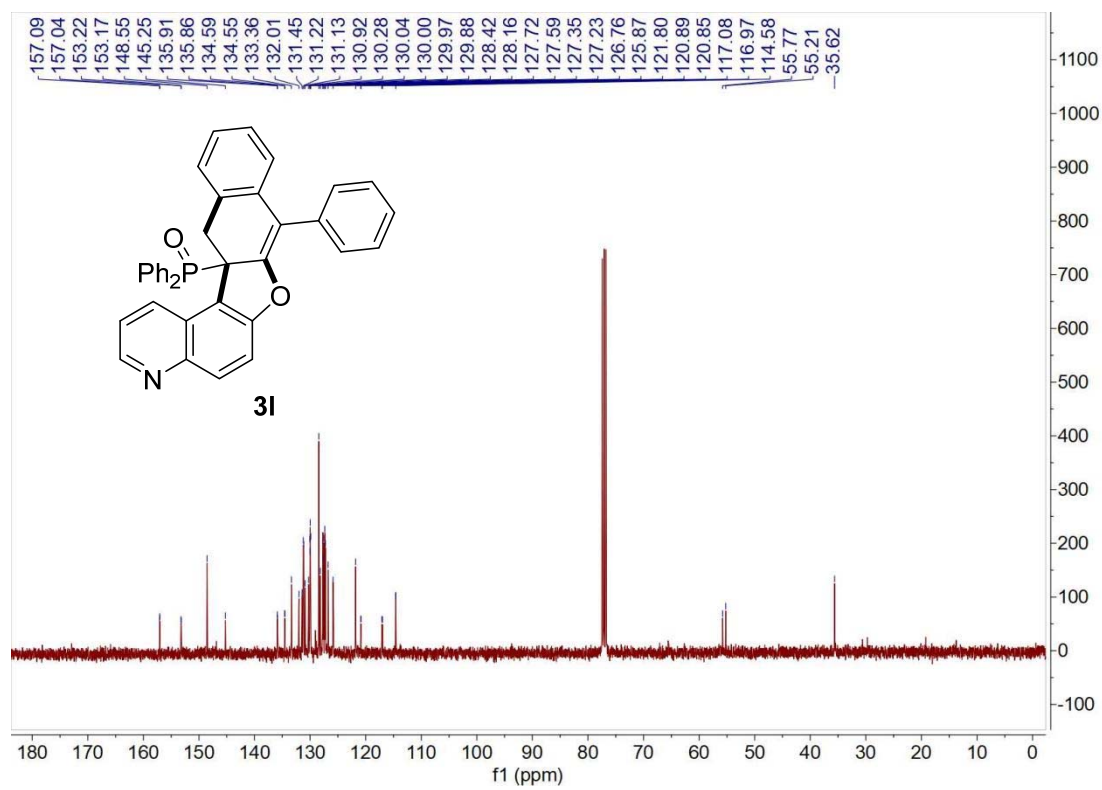

$^{13}\text{C-NMR}$  (101 MHz,  $\text{CDCl}_3$ ) of **3I**

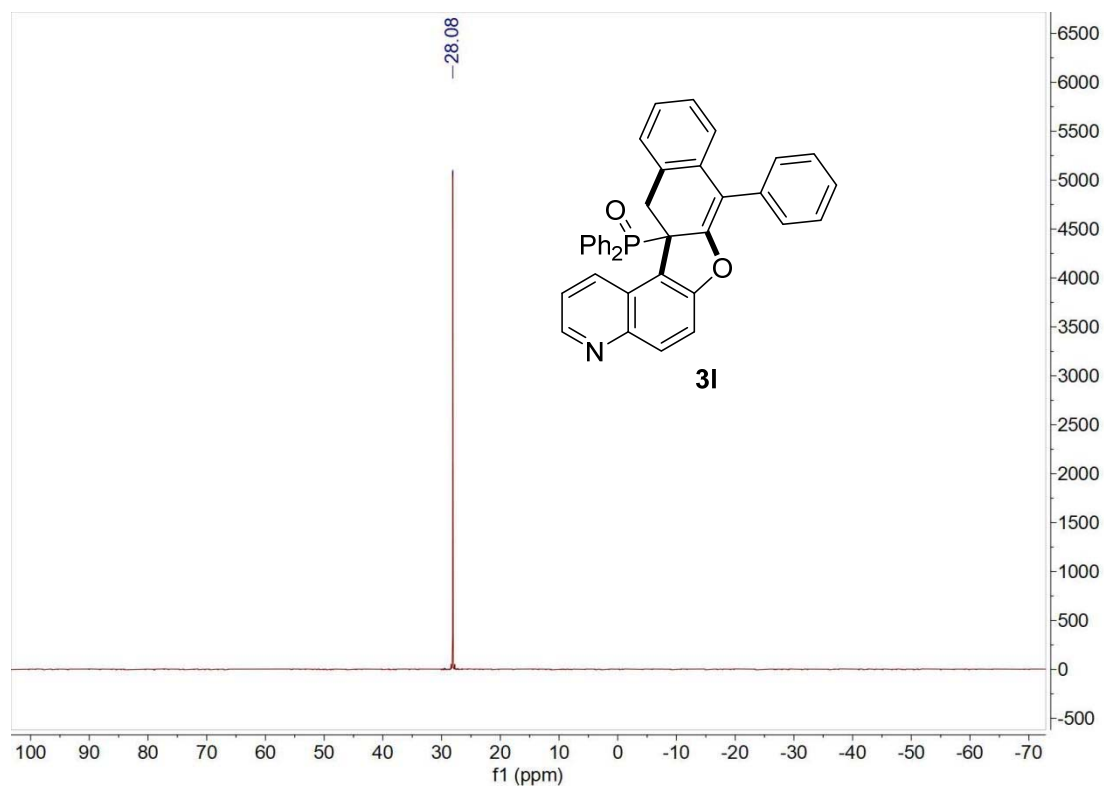

$^{31}\text{P}$ -NMR (162 MHz,  $\text{CDCl}_3$ ) of **3I**

20210624-12 #35 RT: 0.45 AV: 1 NL: 1.95E5  
T: FTMS (1,1) + p ESI Full ms [100.00-1000.00]

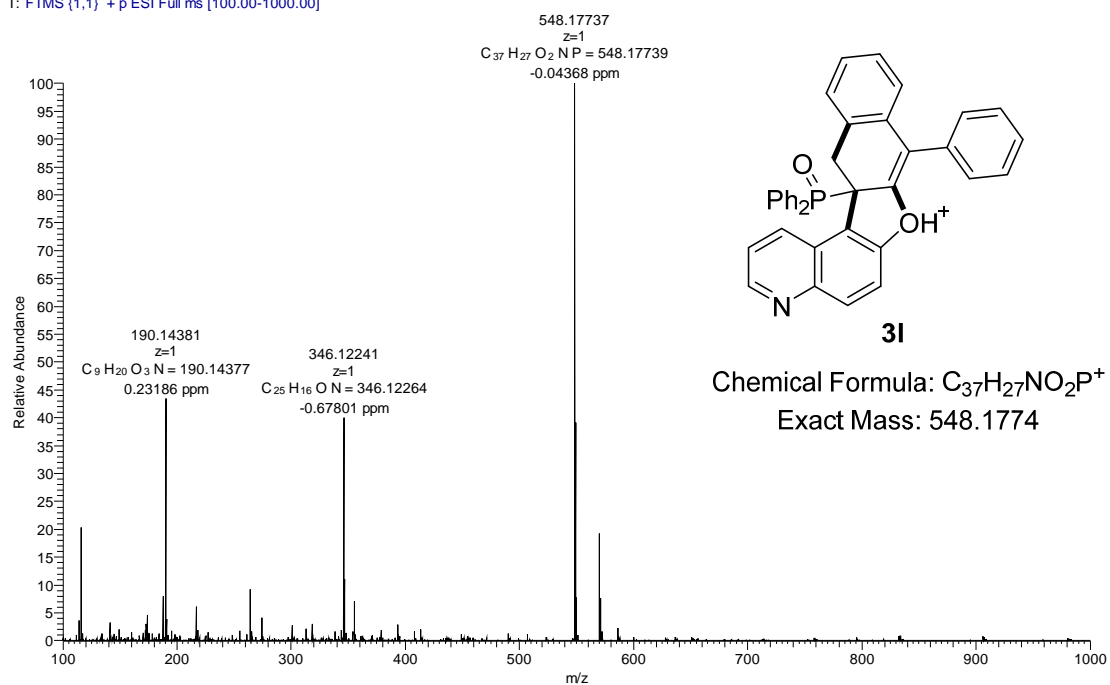

HRMS of **3I**

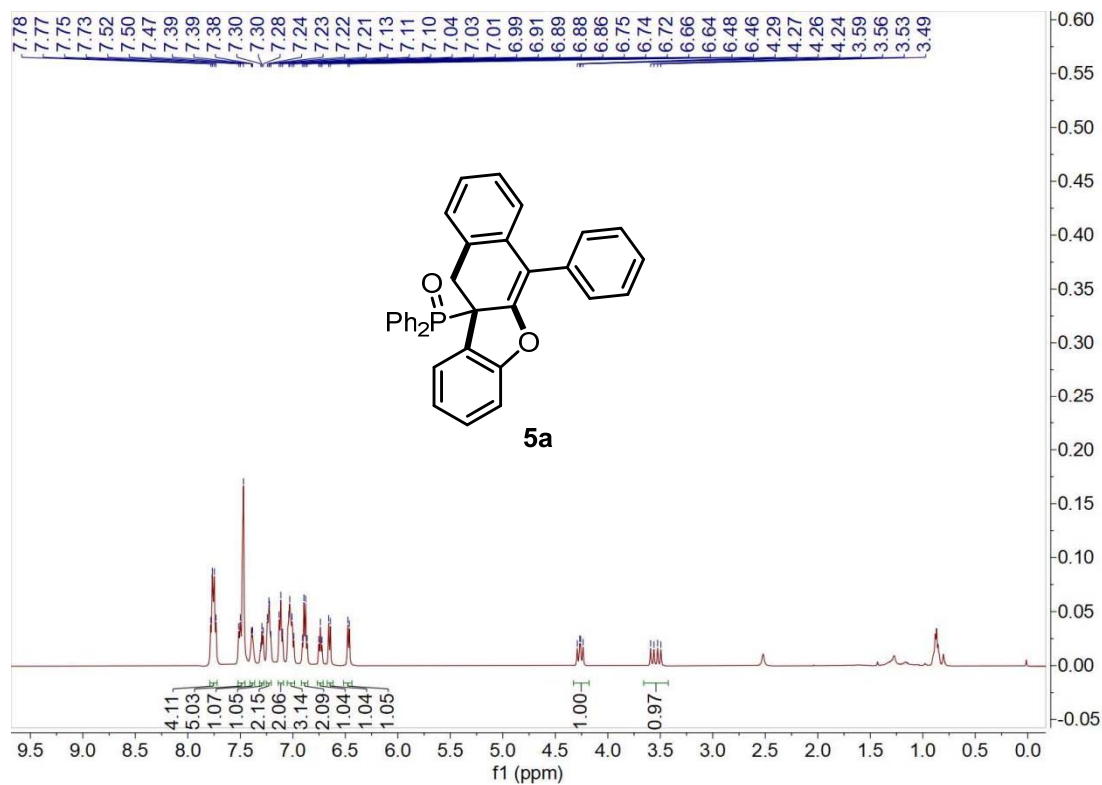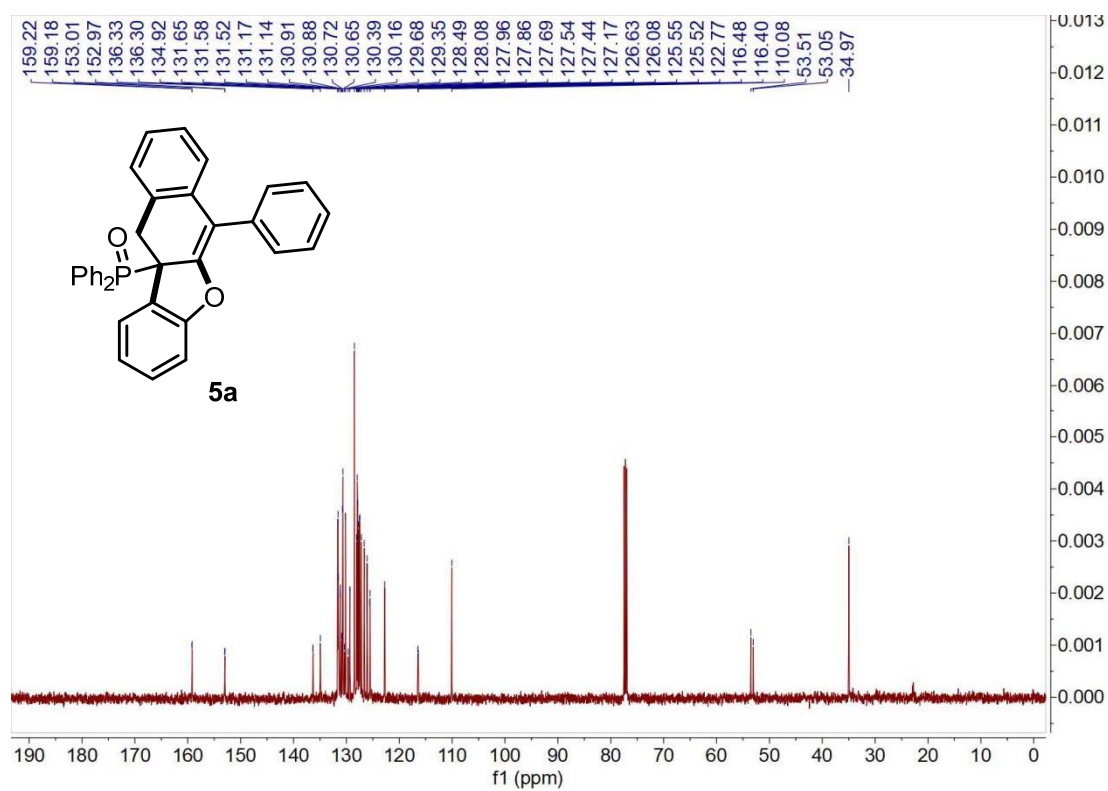

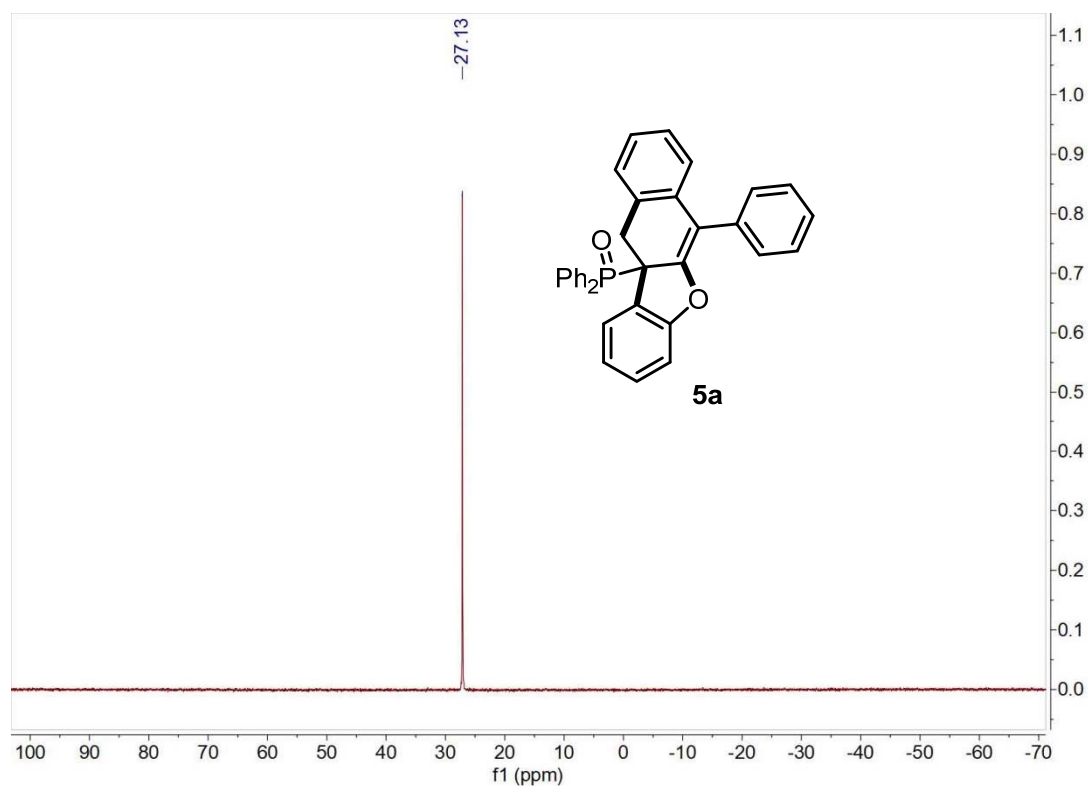

$^{31}\text{P}$  NMR (202 MHz,  $\text{CDCl}_3$ ) of **5a**

Spectrum from 16.wiff (sample 1) - Sample016, Experiment 1, +TOF MS (80 - 1000) from 0.651 min

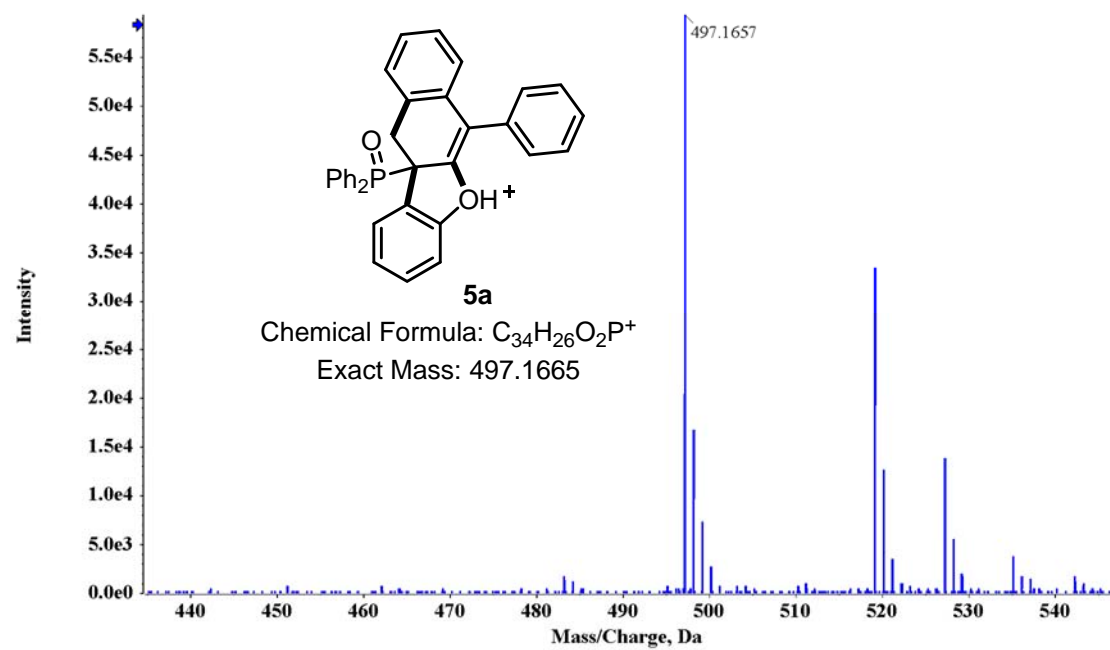

HRMS of **5a**

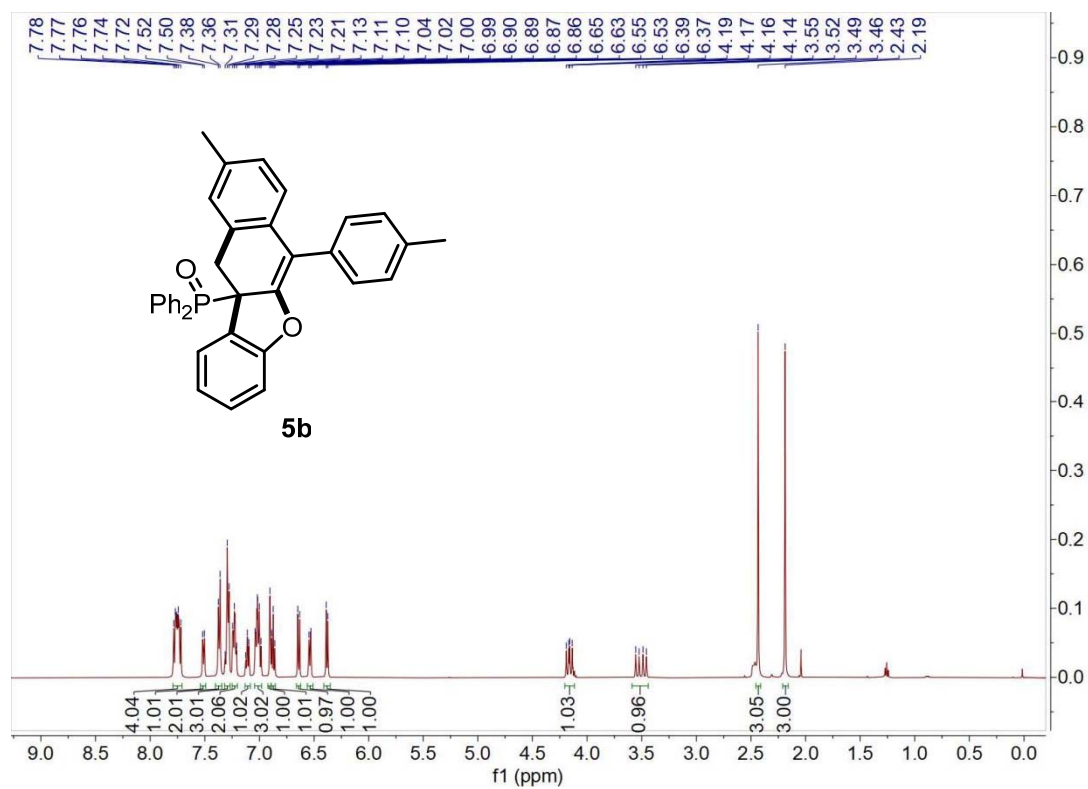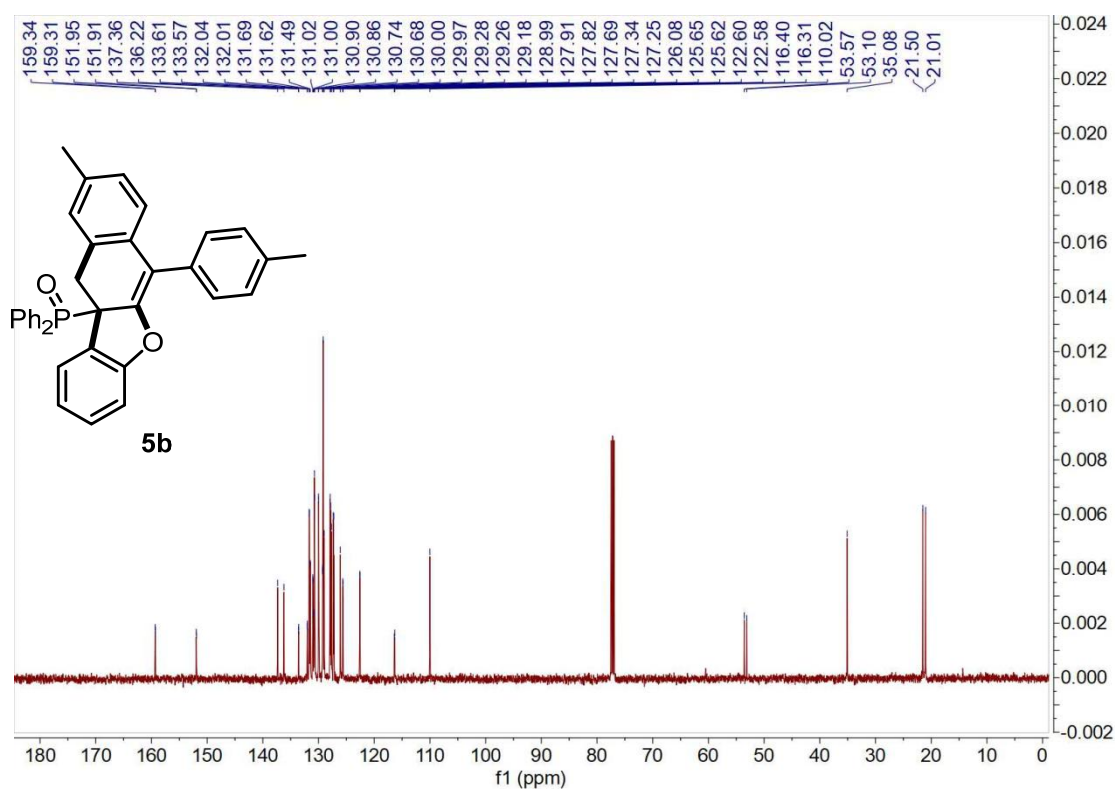

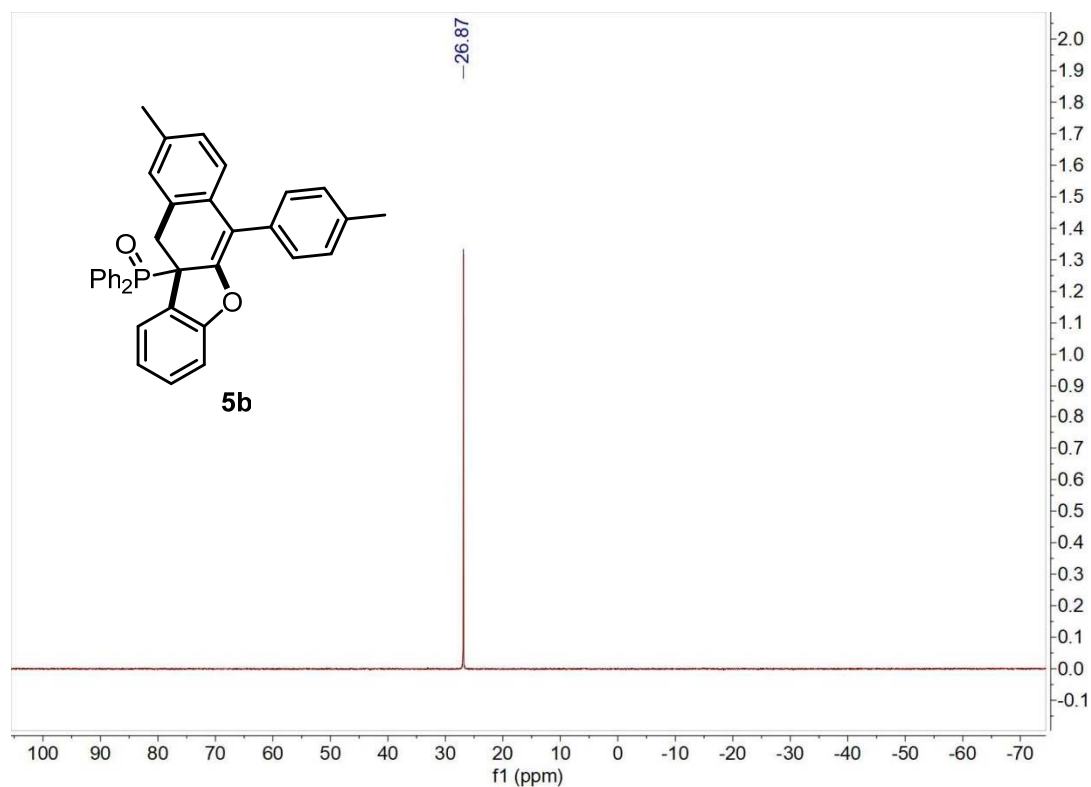

25 #27 RT: 0.32 AV: 1 NL: 1.75E6  
T: FTMS (1,1) + p ESI Full ms [100.00-1000.00]

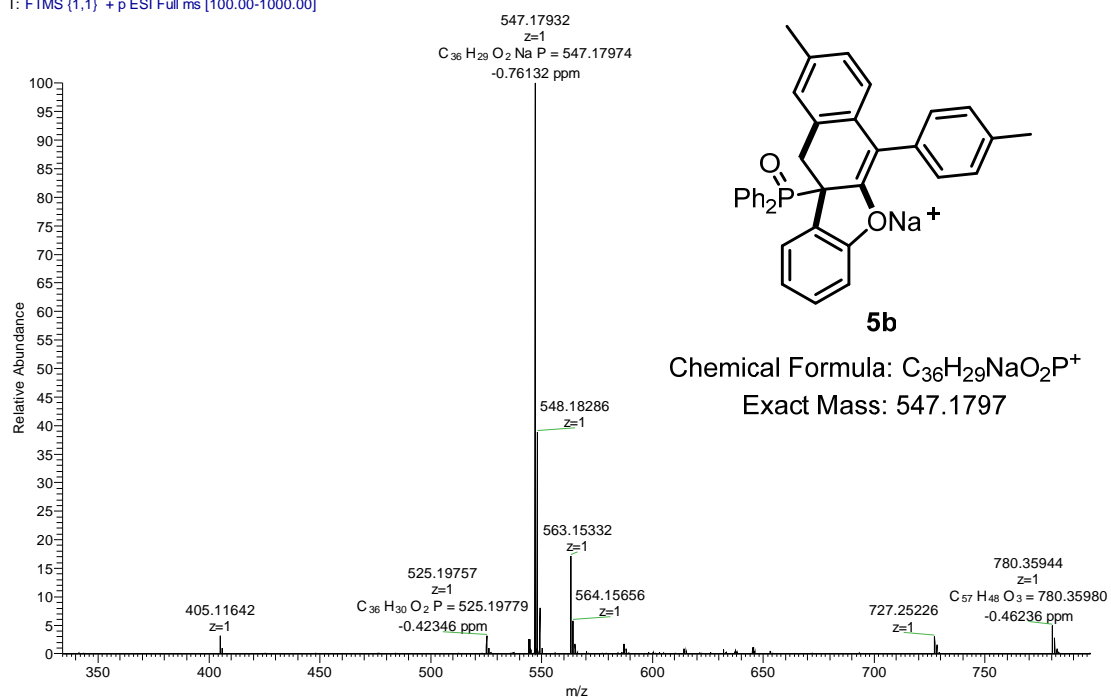

HRMS of **5b**



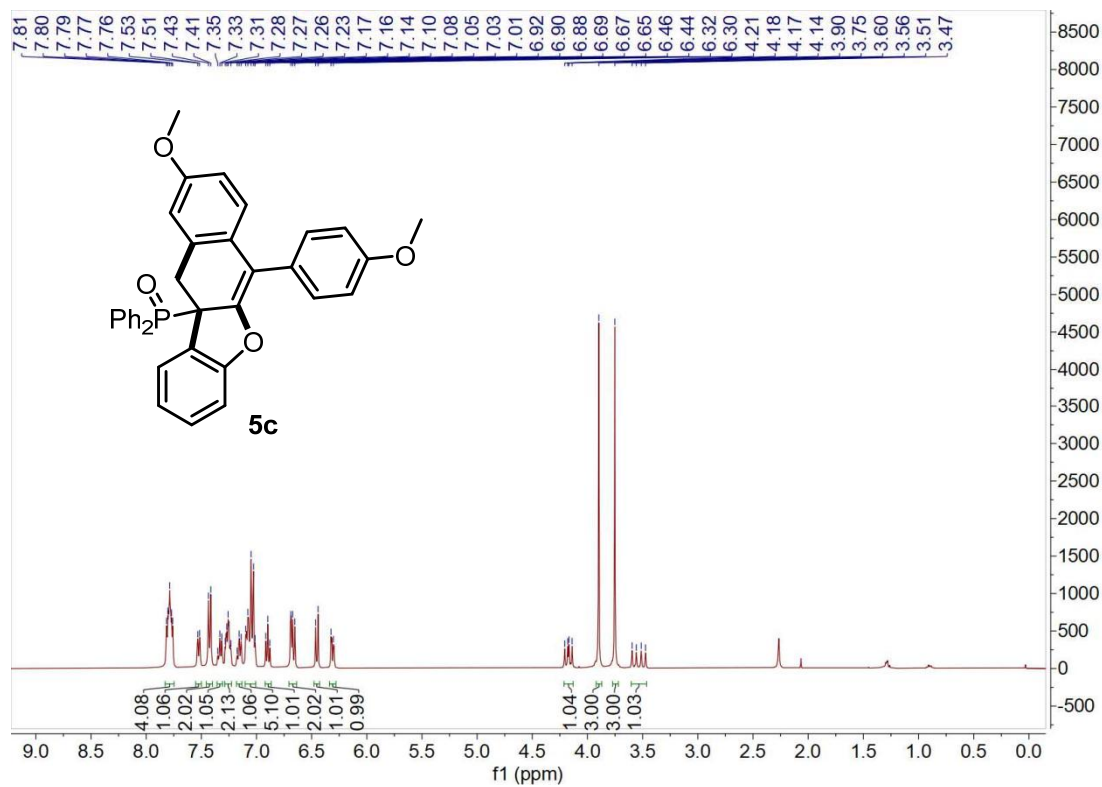

$^1\text{H-NMR}$  (400 MHz,  $\text{CDCl}_3$ ) of **5c**

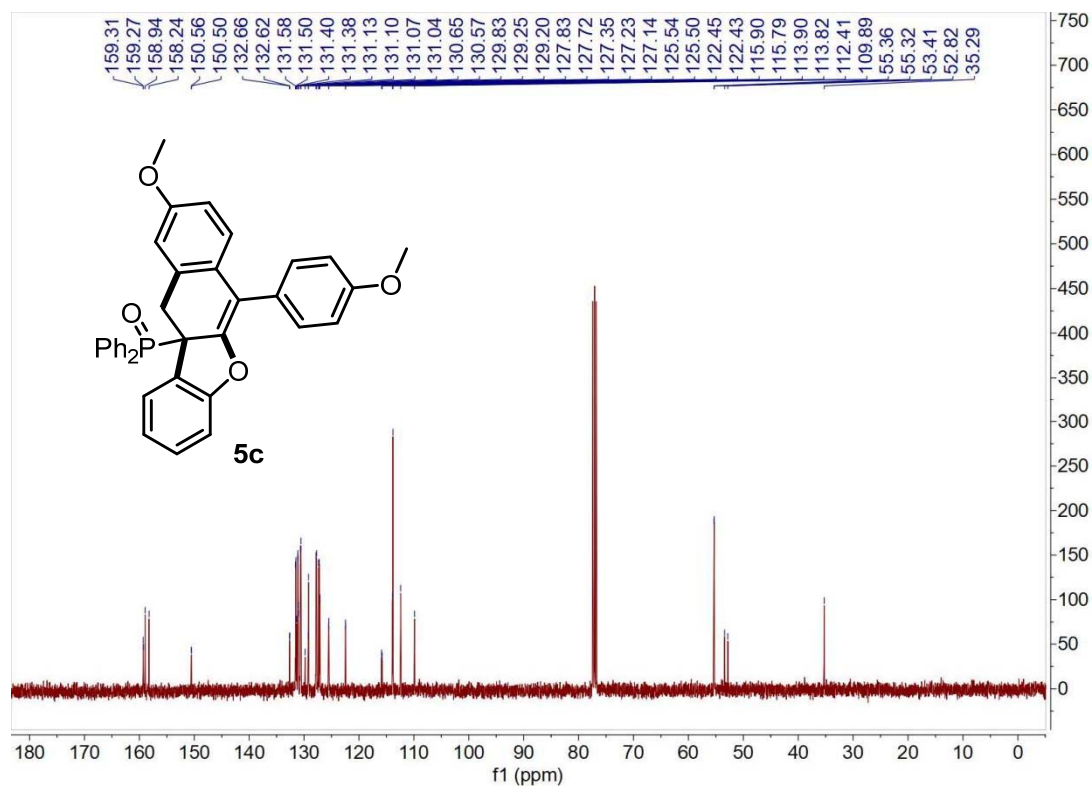

$^{13}\text{C-NMR}$  (101 MHz,  $\text{CDCl}_3$ ) of **5c**

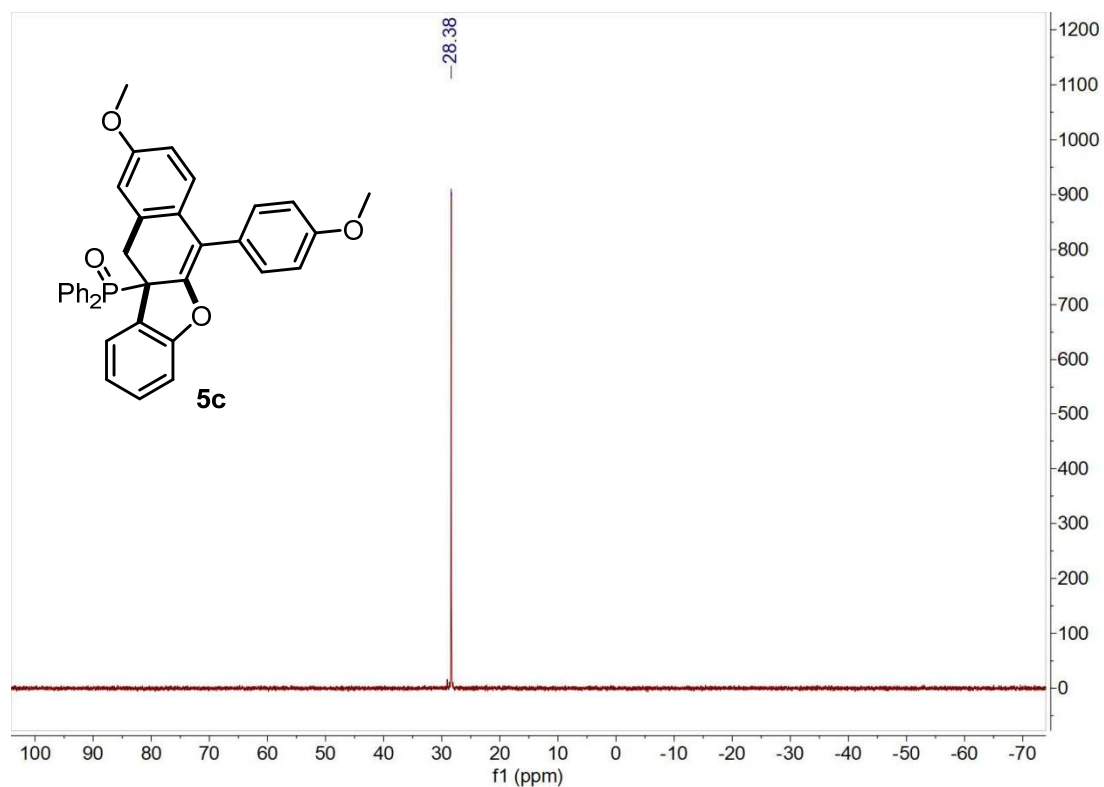

20210624-15 #33 RT: 0.42 AV: 1 NL: 1.22E5  
 T: FTMS (1,1) + p ESI Full ms [100.00-1000.00]

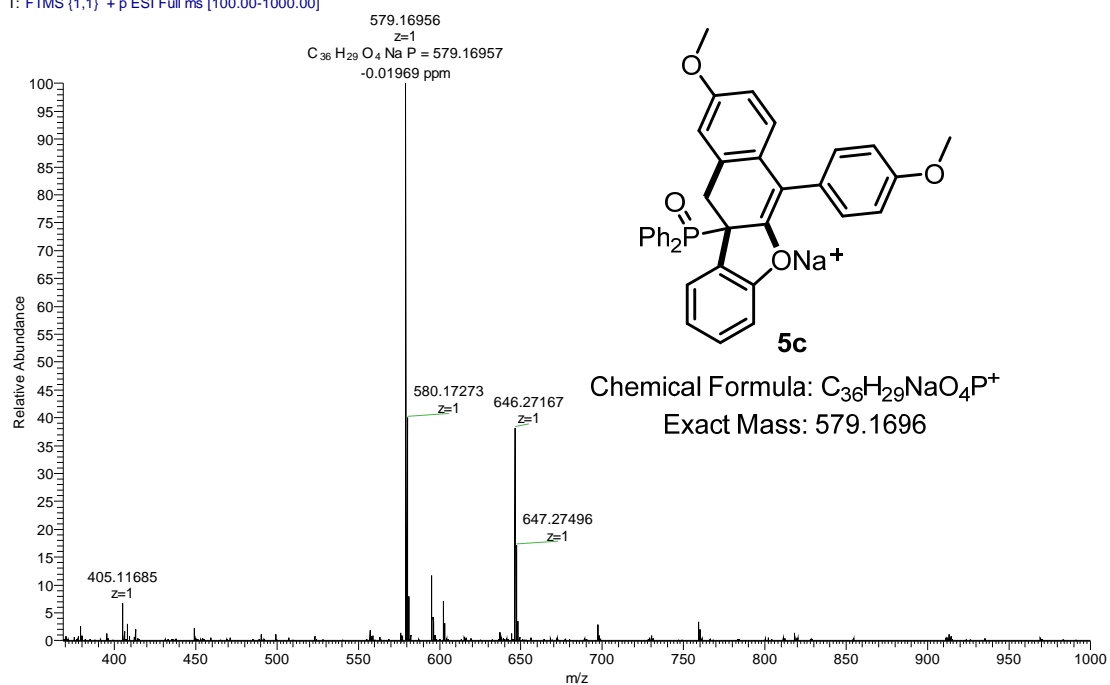

**HRMS of 5c**

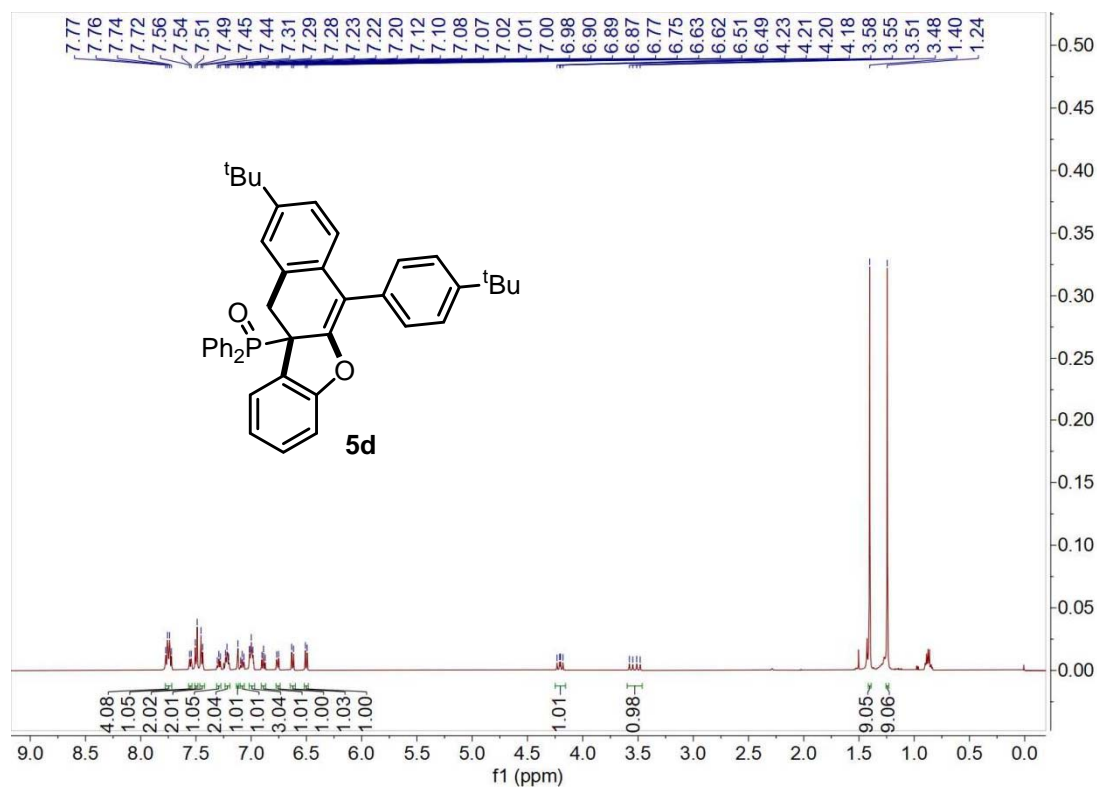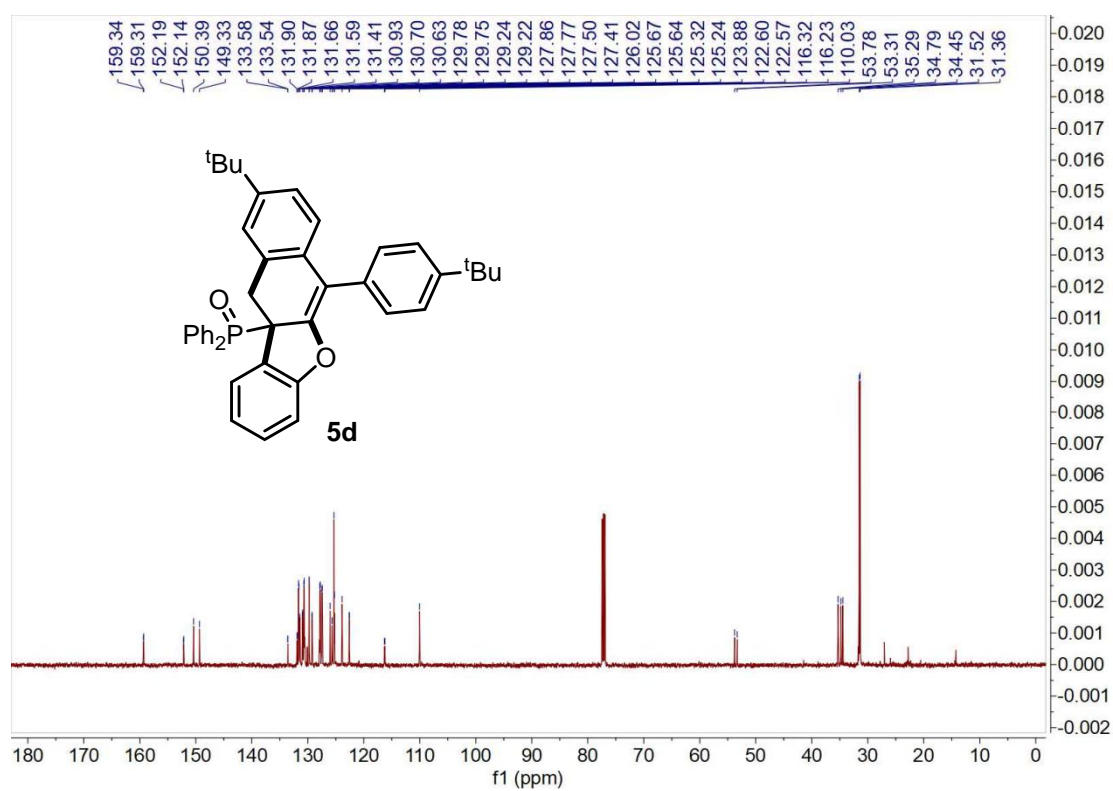

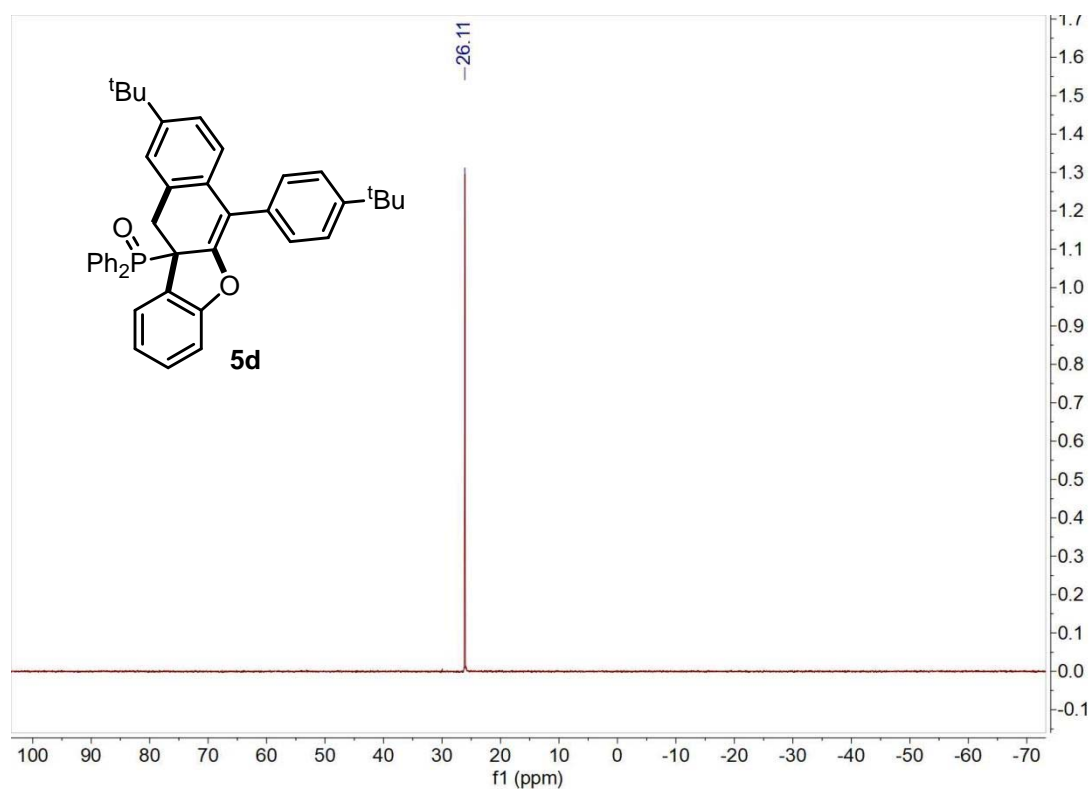

$^{31}\text{P}$ -NMR (202 MHz,  $\text{CDCl}_3$ ) of **5d**

20210624-16 #49 RT: 0.65 AV: 1 NL: 1.50E5  
T: FTMS (1,1) + p ESI Full ms [100.00-1000.00]

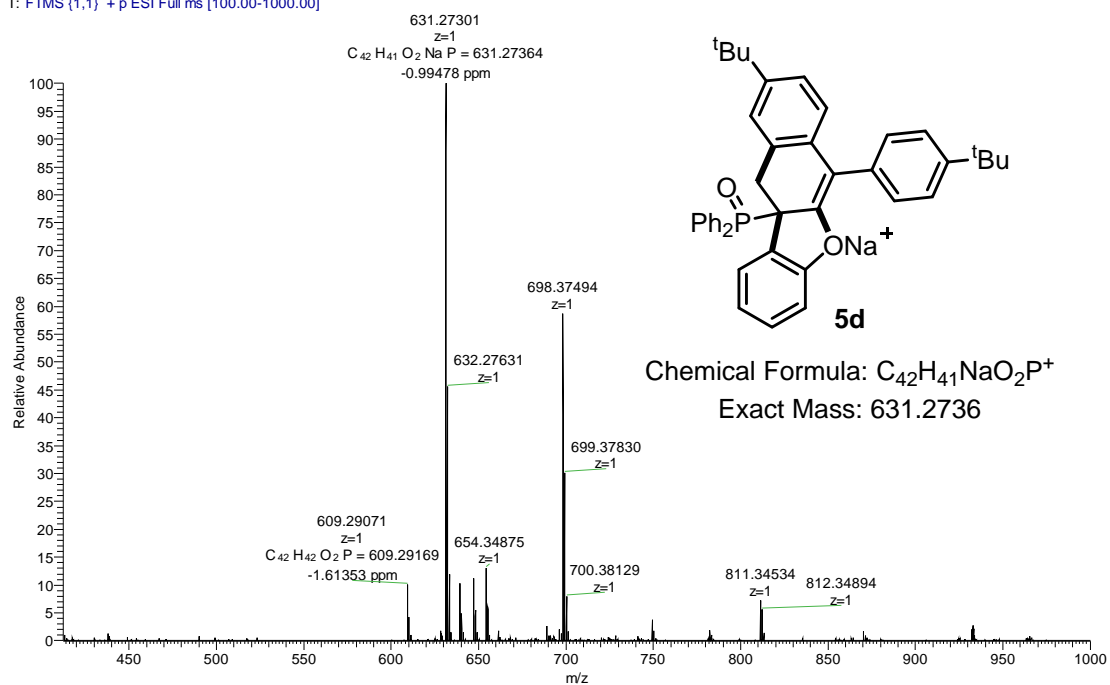

HRMS of **5d**

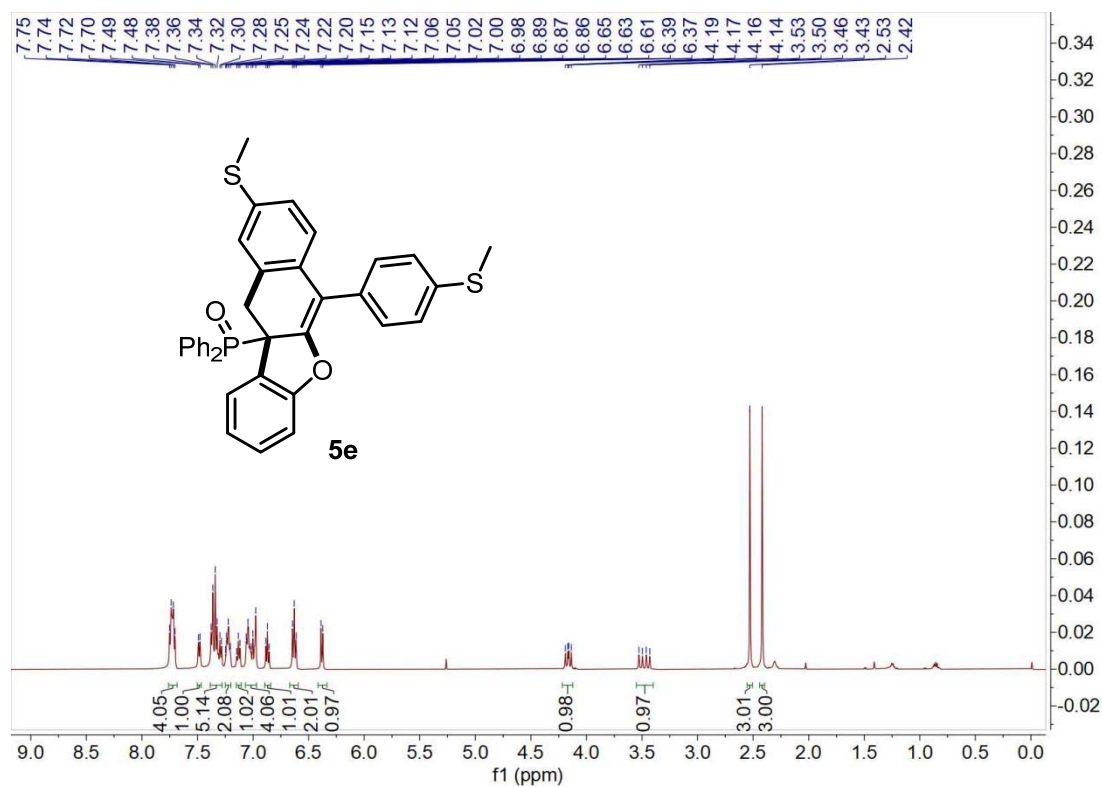

<sup>1</sup>H-NMR (500 MHz, CDCl<sub>3</sub>) of **5e**

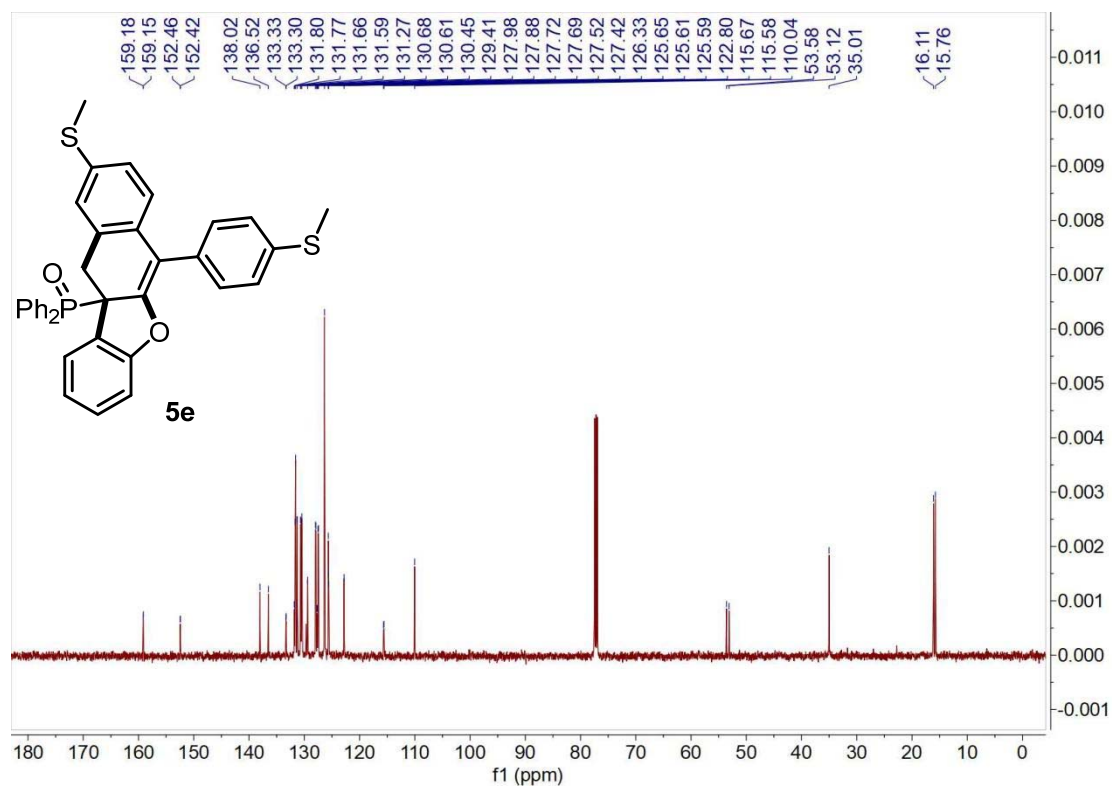

<sup>13</sup>C-NMR (126 MHz, CDCl<sub>3</sub>) of **5e**

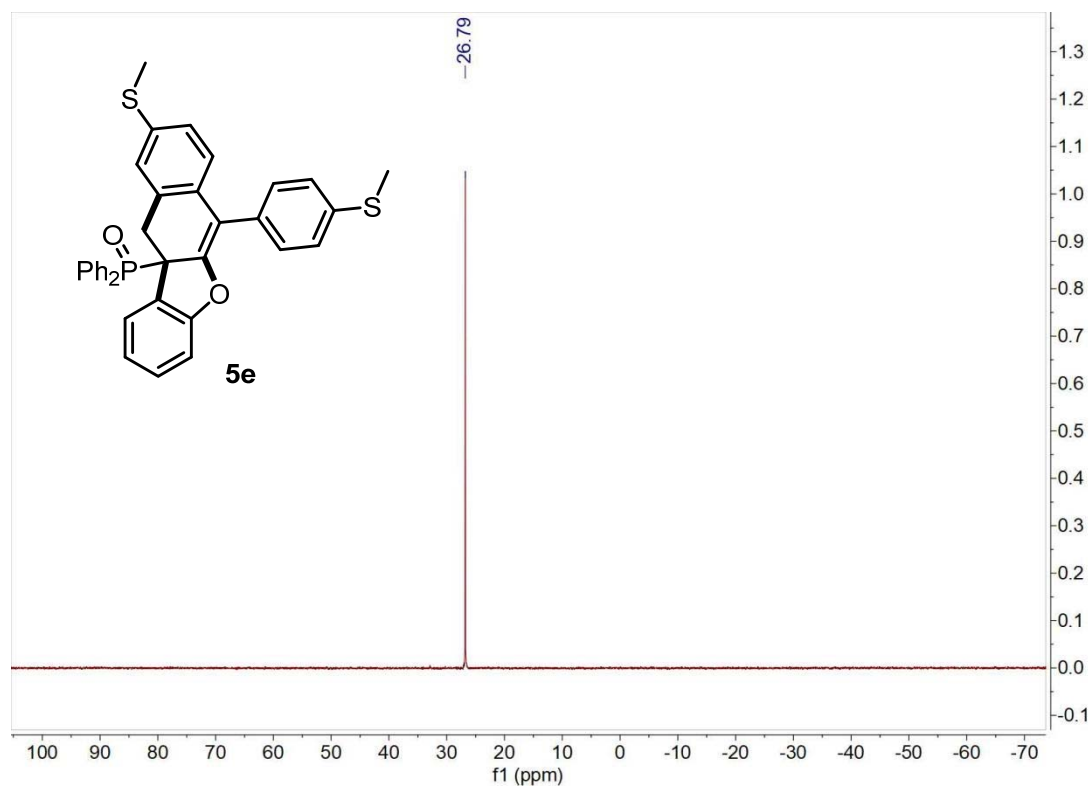

$^{31}\text{P}$ -NMR (202 MHz,  $\text{CDCl}_3$ ) of **5e**

24 #21 RT: 0.26 AV: 1 NL: 1.01E6  
T: FTMS (1,1) + p ESI Full ms [100.00-1000.00]

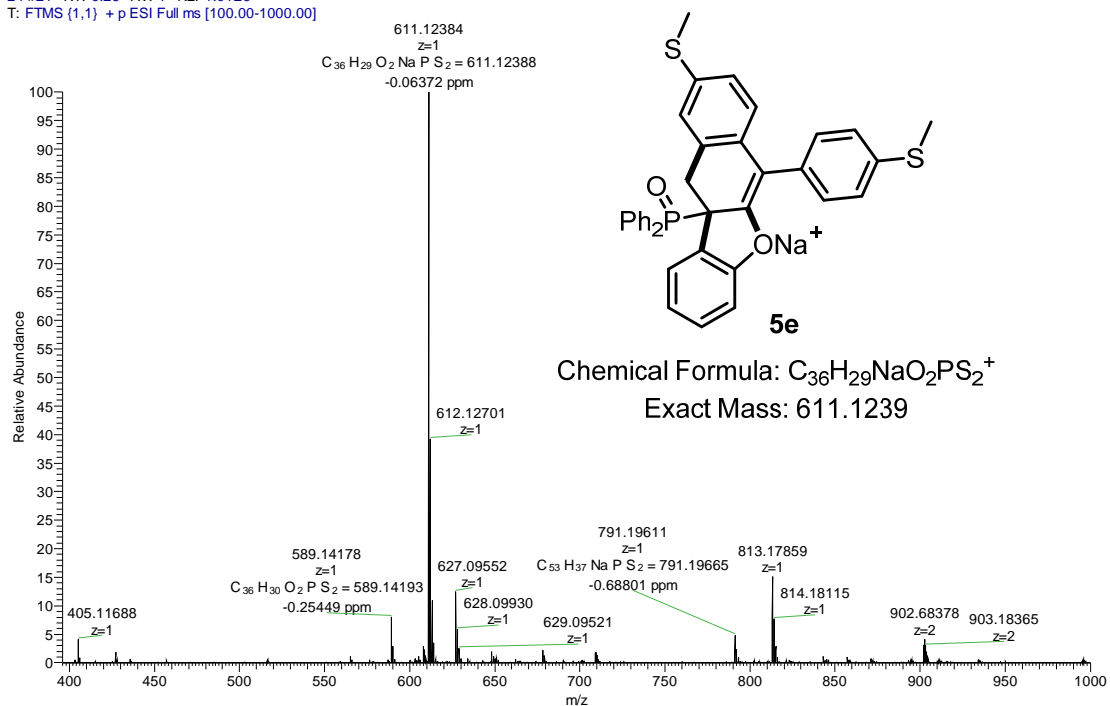

HRMS of **5e**

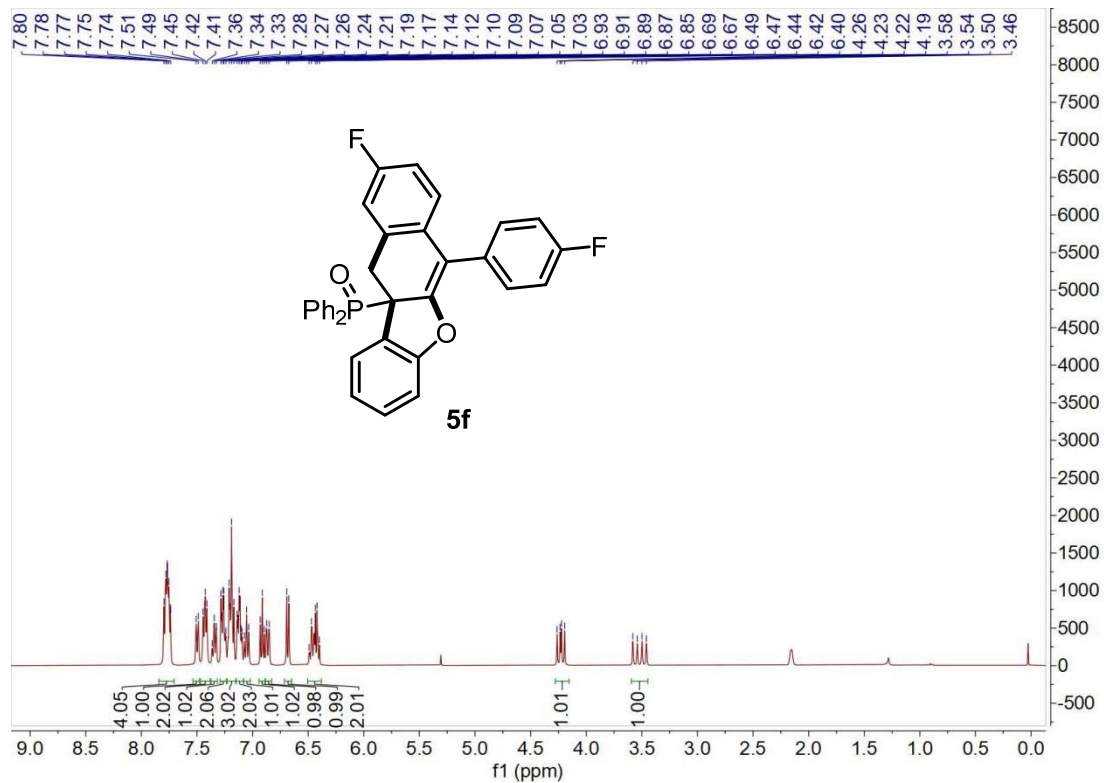

**<sup>1</sup>H-NMR (400 MHz, CDCl<sub>3</sub>) of **5f****

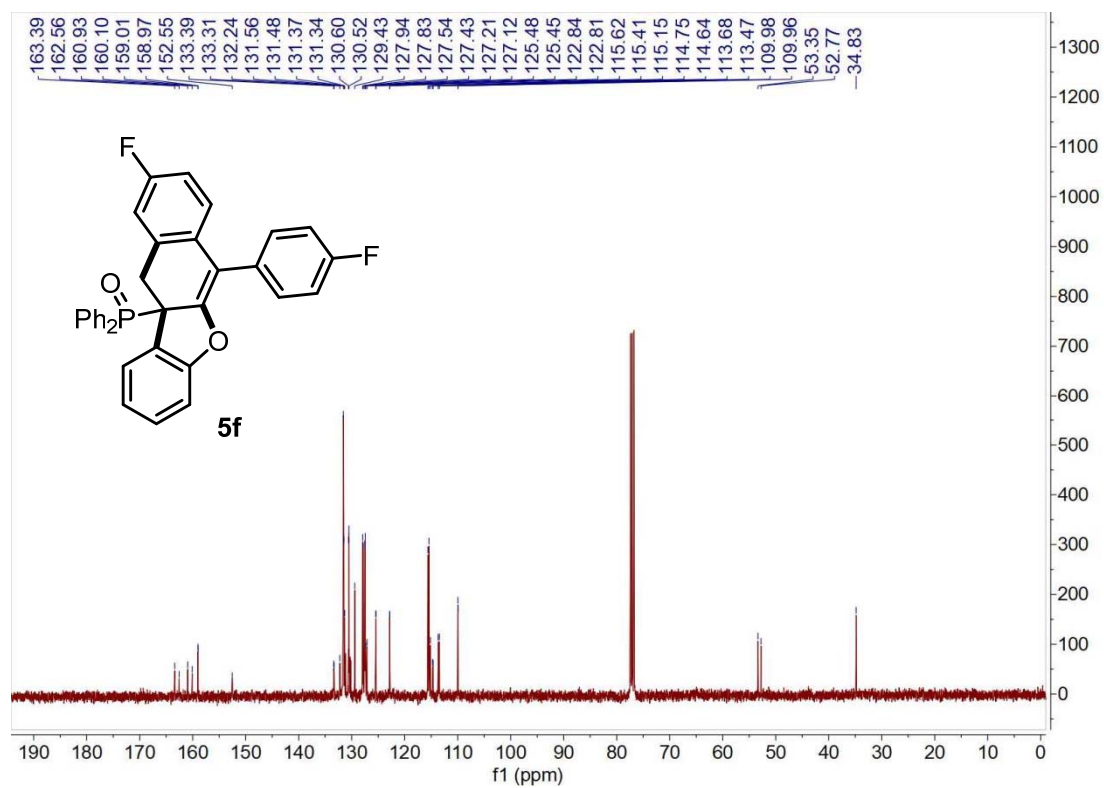

**<sup>13</sup>C-NMR (101 MHz, CDCl<sub>3</sub>) of **5f****

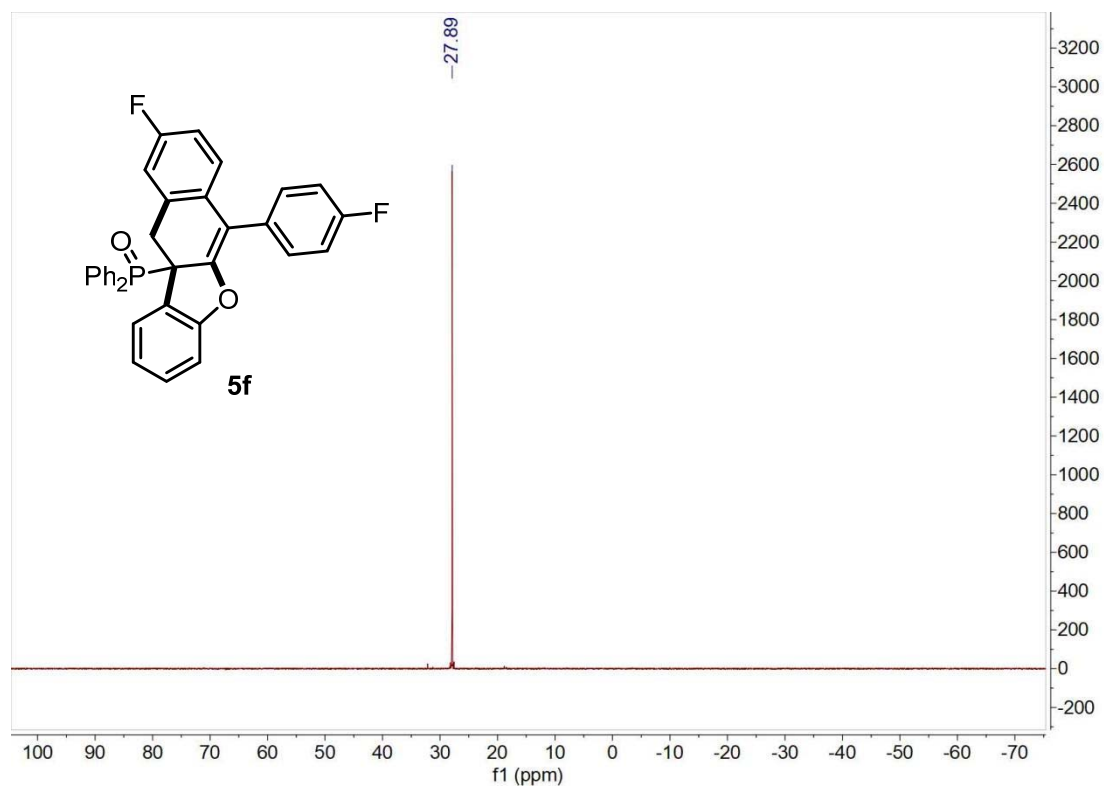

$^{31}\text{P}$ -NMR (162 MHz,  $\text{CDCl}_3$ ) of **5f**

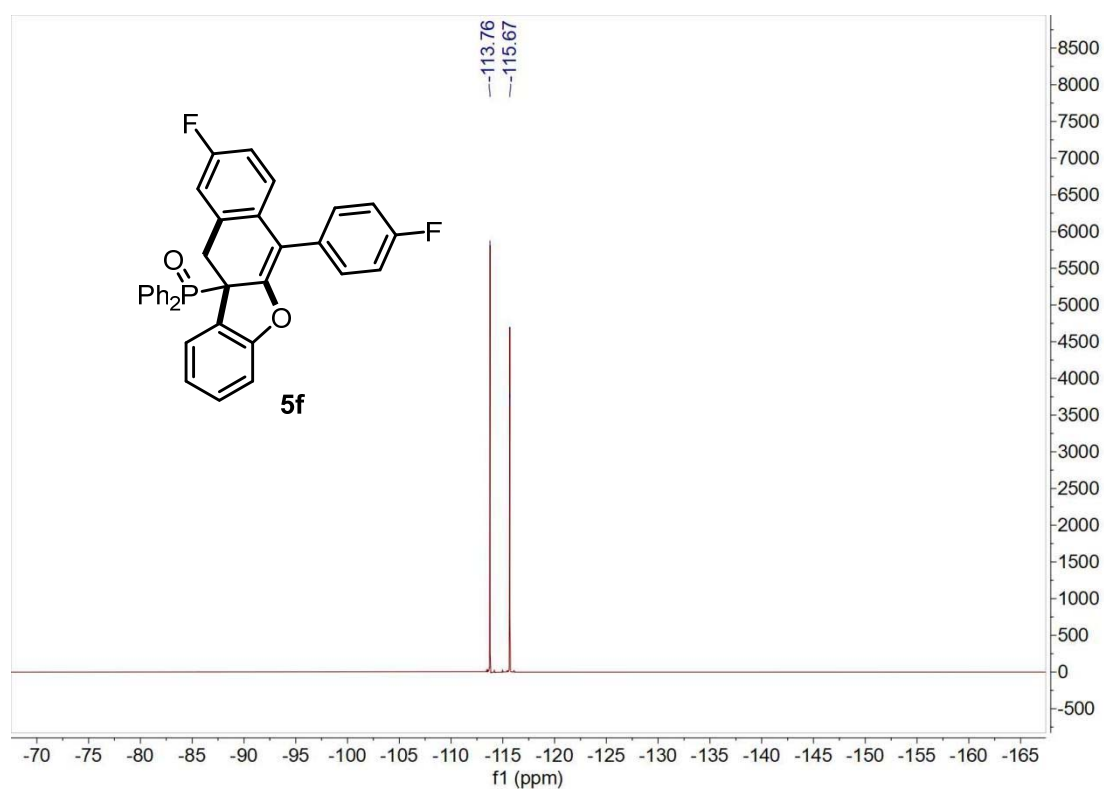

$^{19}\text{F}$ -NMR (376 MHz,  $\text{CDCl}_3$ ) of **5f**



20210624-13 #35 RT: 0.46 AV: 1 NL: 1.03E5  
T: FTMS (1,1) + p ESI Full ms [100.00-1000.00]

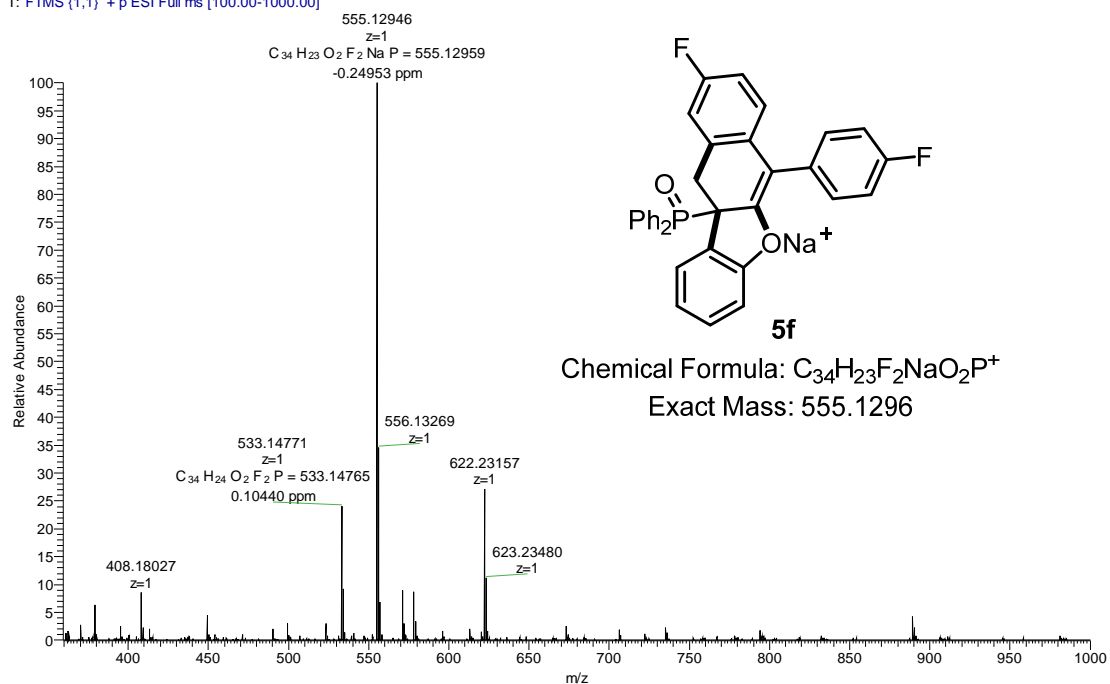

HRMS of **5f**

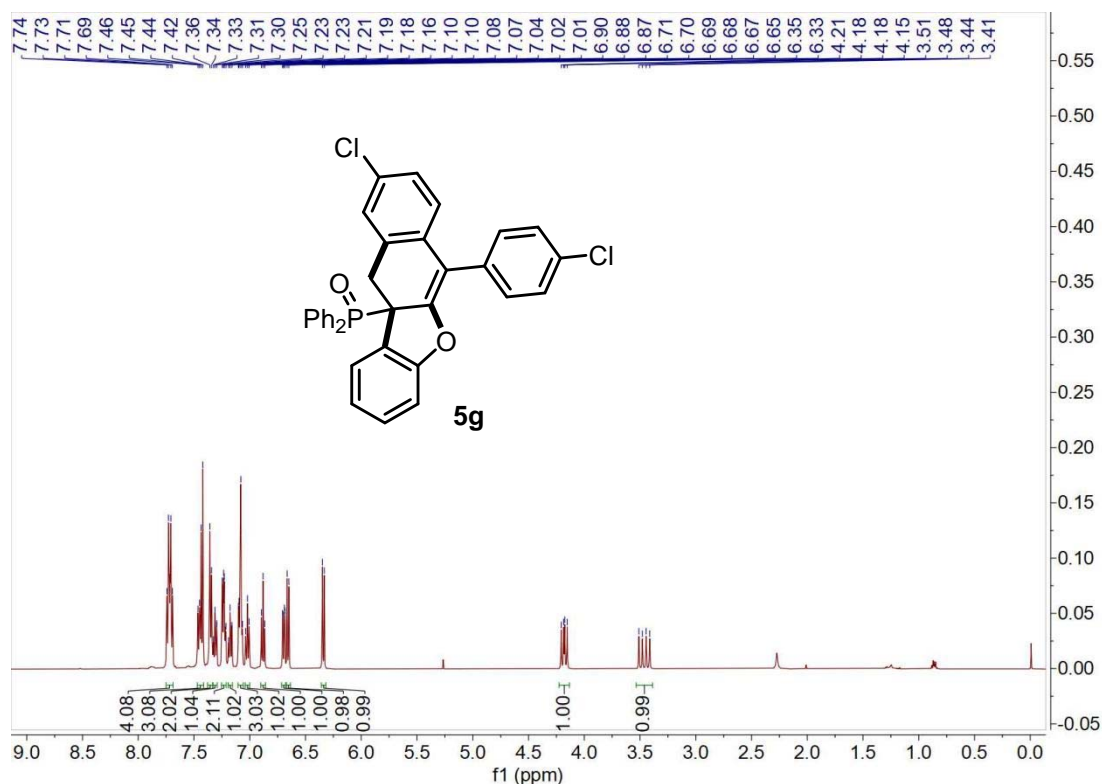

<sup>1</sup>H-NMR (500 MHz, CDCl<sub>3</sub>) of **5g**

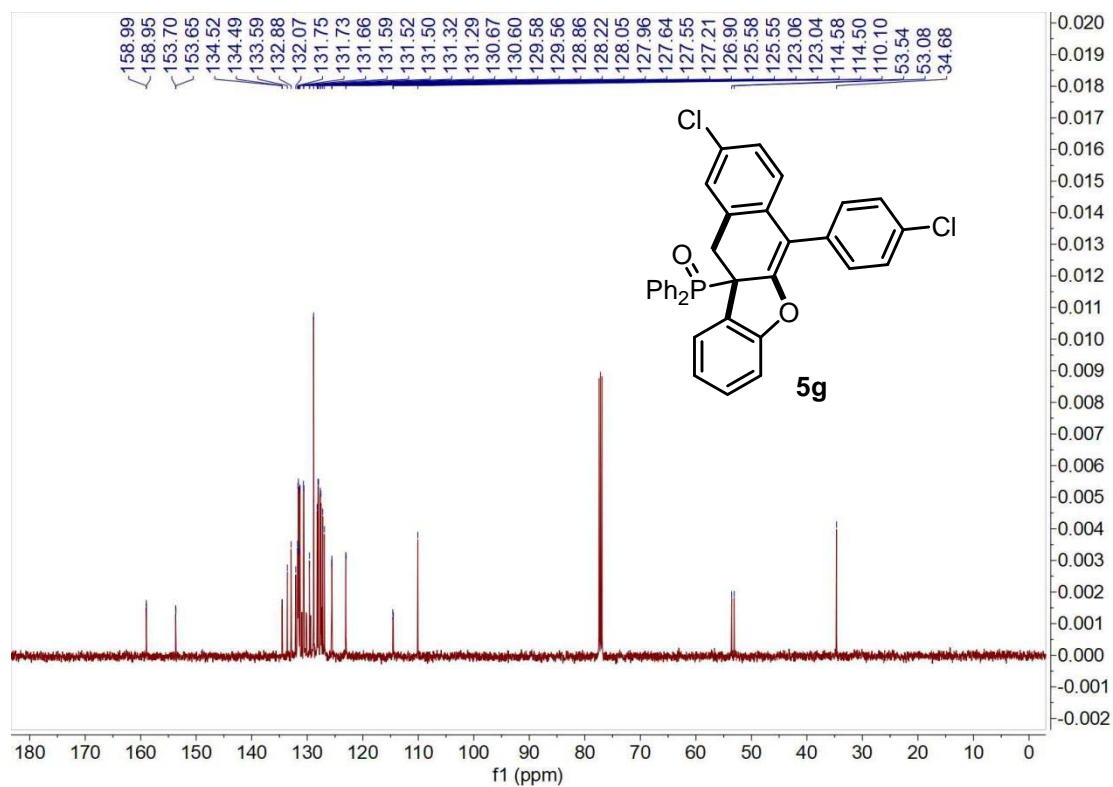

$^{13}\text{C}$ -NMR (126 MHz,  $\text{CDCl}_3$ ) of **5g**

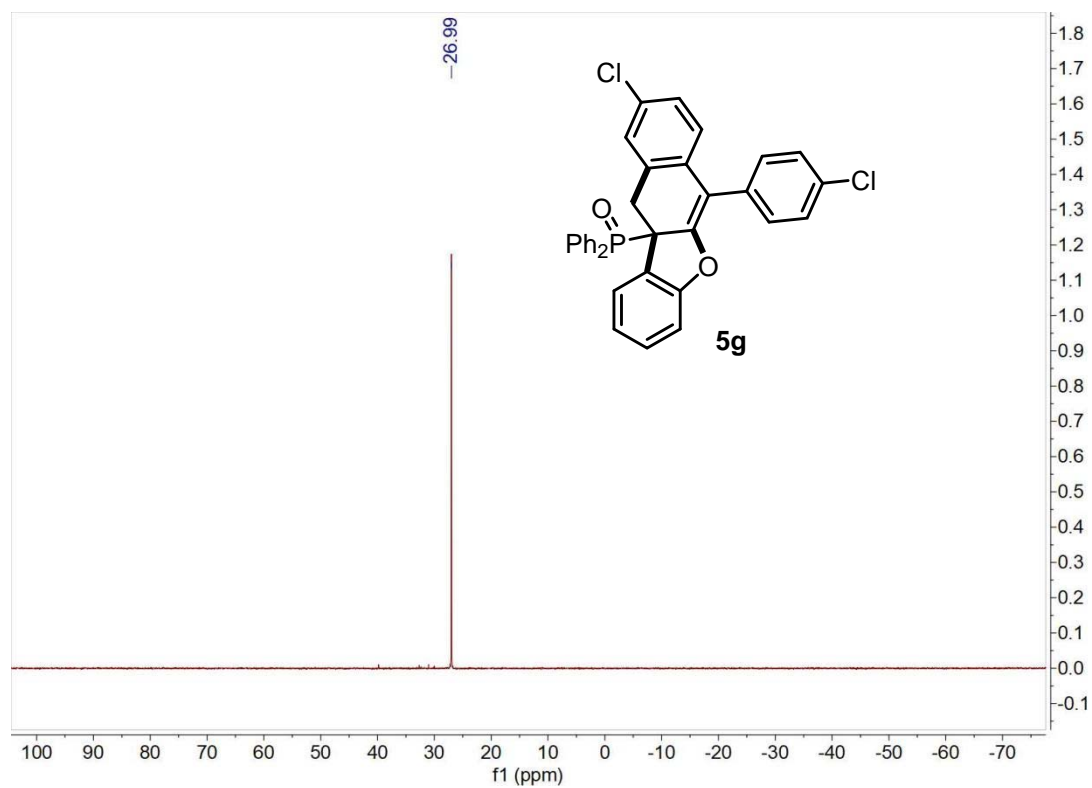

$^{31}\text{P}$ -NMR (202 MHz,  $\text{CDCl}_3$ ) of **5g**

20210624-14 #37 RT: 0.49 AV: 1 NL: 8.79E4  
T: FTMS (1,1) + p ESI Full ms [100.00-1000.00]

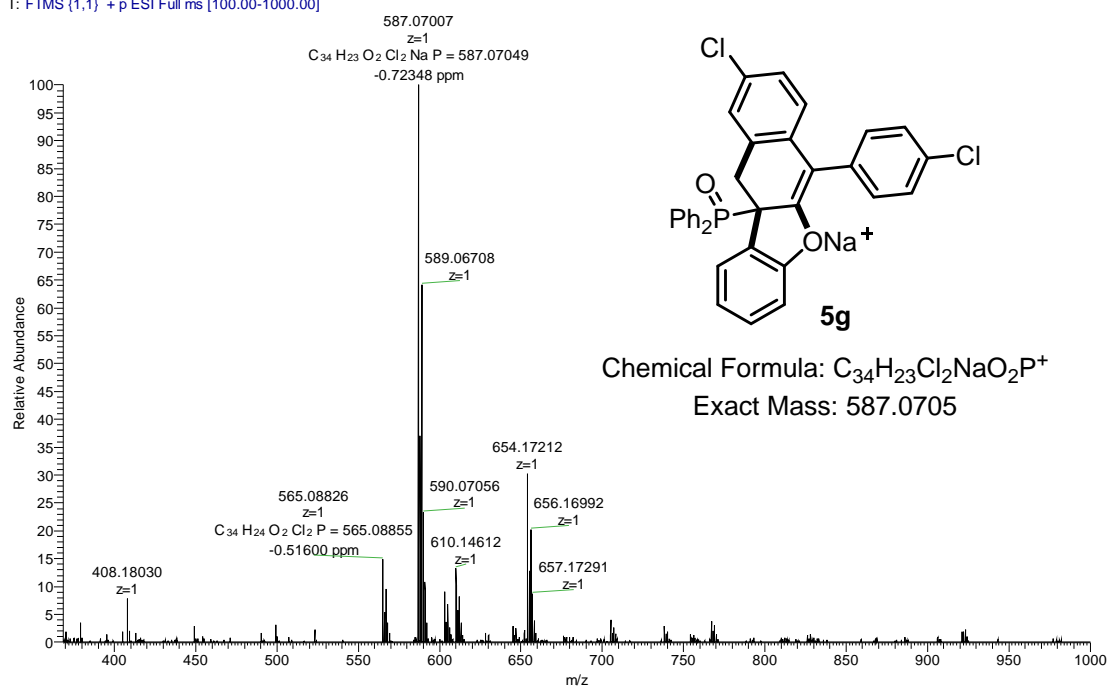

HRMS of **5g**

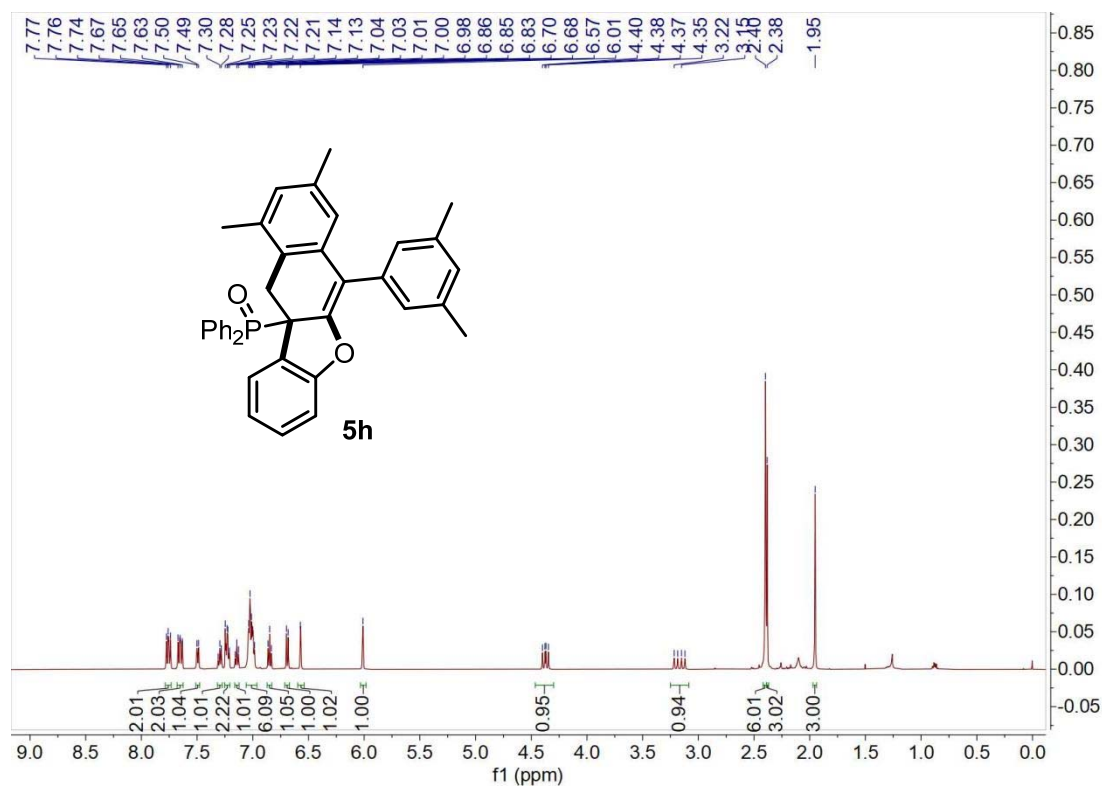

<sup>1</sup>H-NMR (500 MHz, CDCl<sub>3</sub>) of **5h**

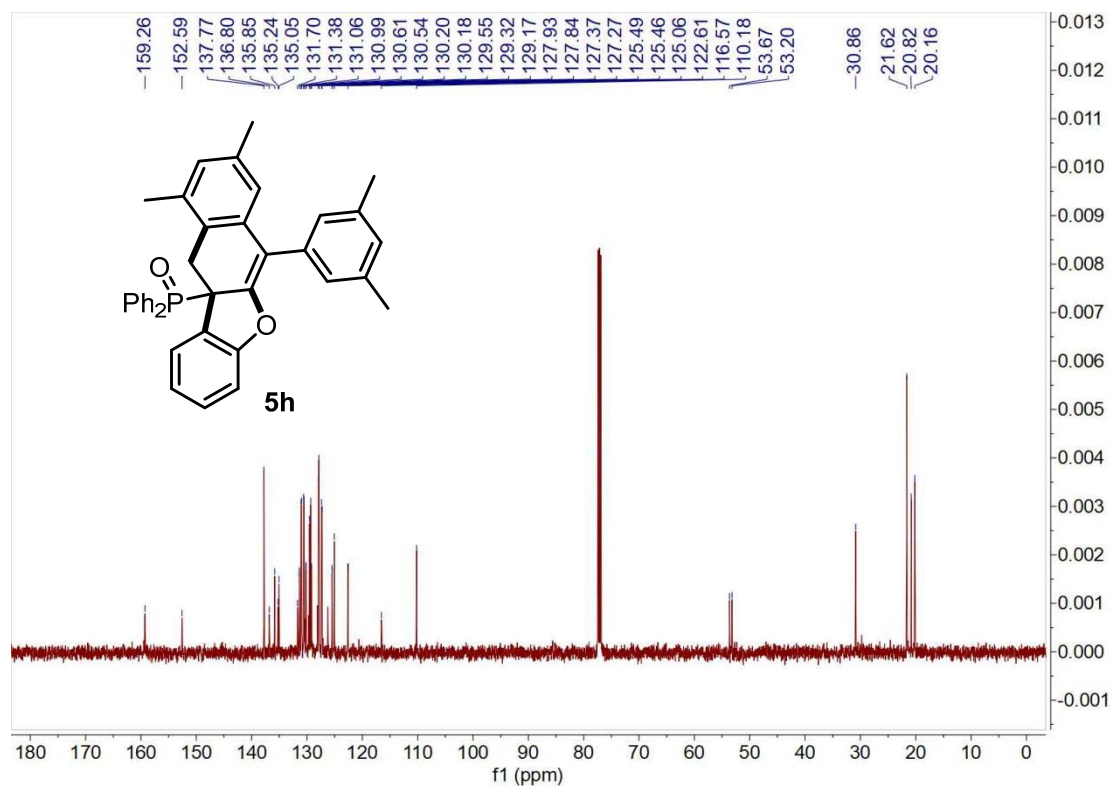

$^{13}\text{C}$ -NMR (126 MHz,  $\text{CDCl}_3$ ) of **5h**

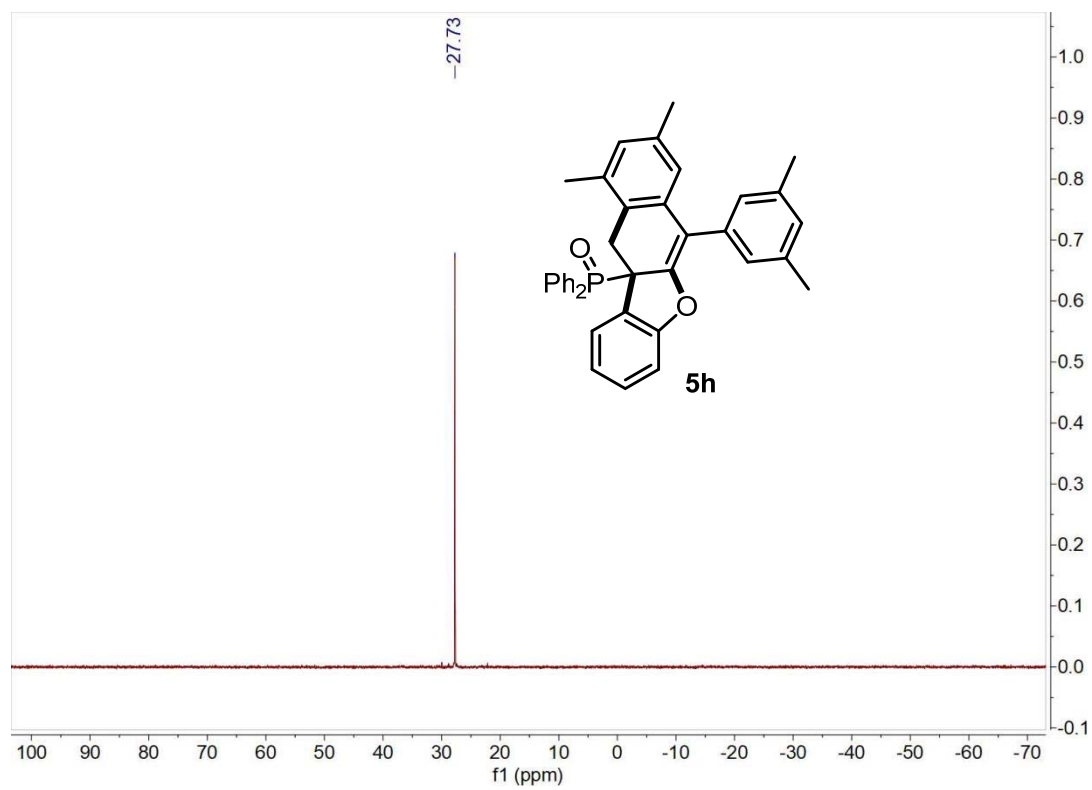

$^{31}\text{P}$ -NMR (202 MHz,  $\text{CDCl}_3$ ) of **5h**

20210719-21 #29 RT: 0.34 AV: 1 NL: 9.87E5  
T: FTMS (1,1) + p ESI Full ms [100.00-1000.00]

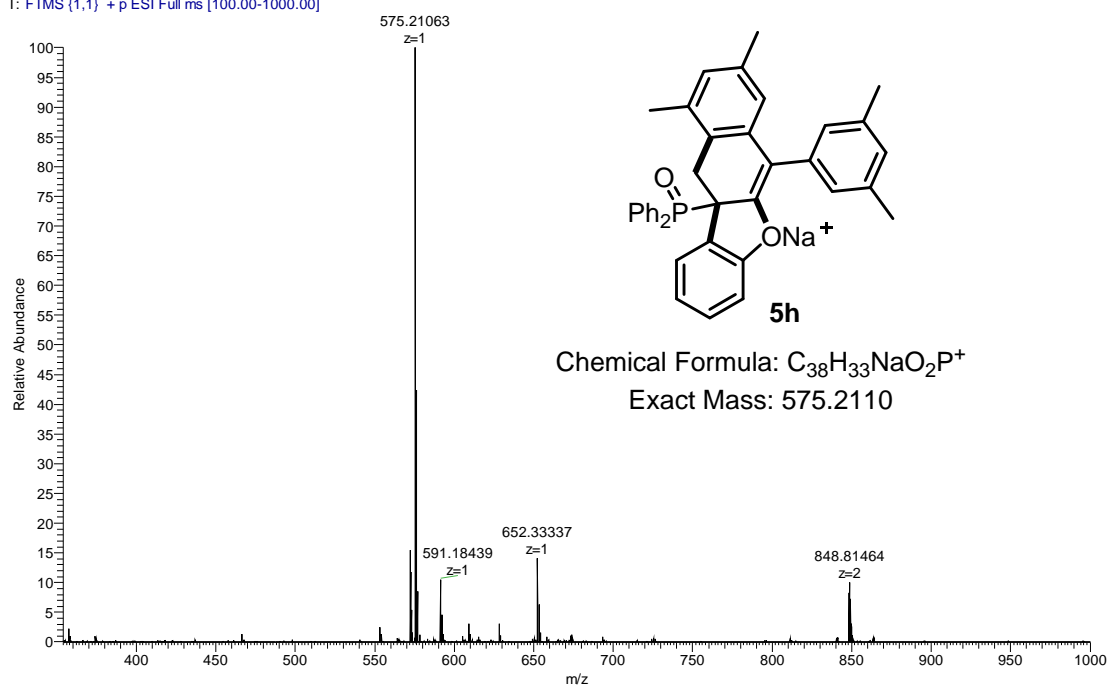

HRMS of **5h**

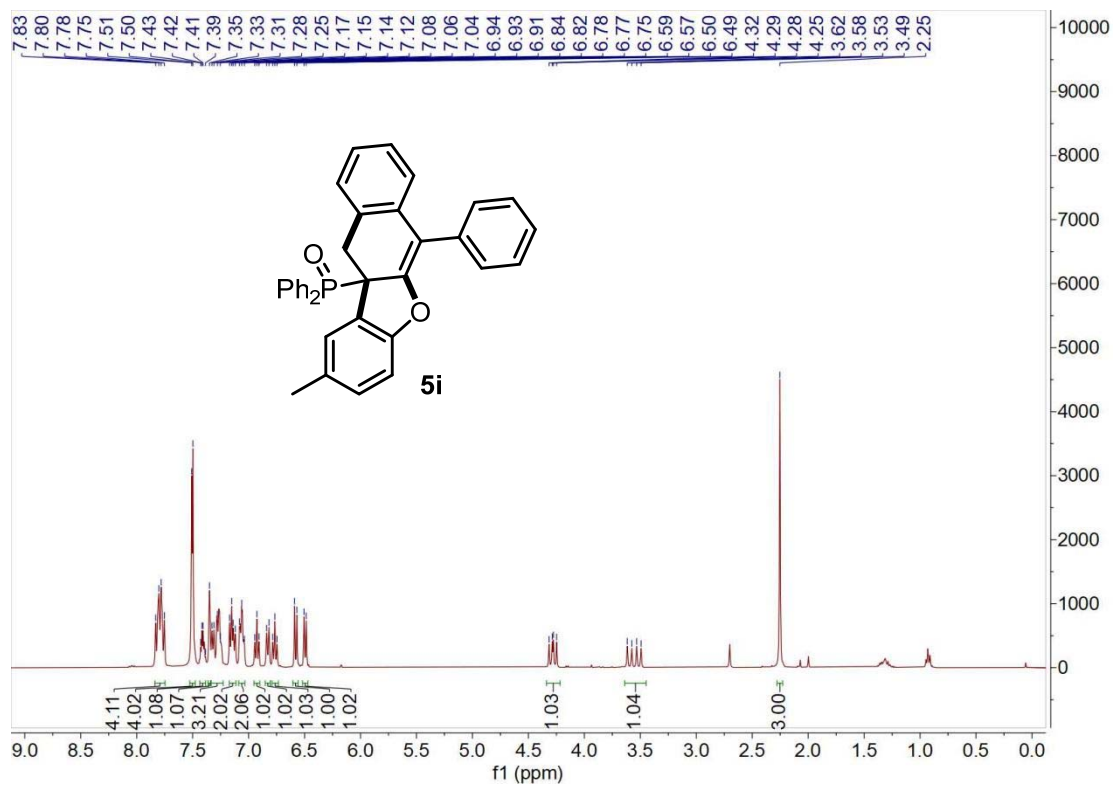

$^1H$ -NMR (400 MHz,  $CDCl_3$ ) of **5i**

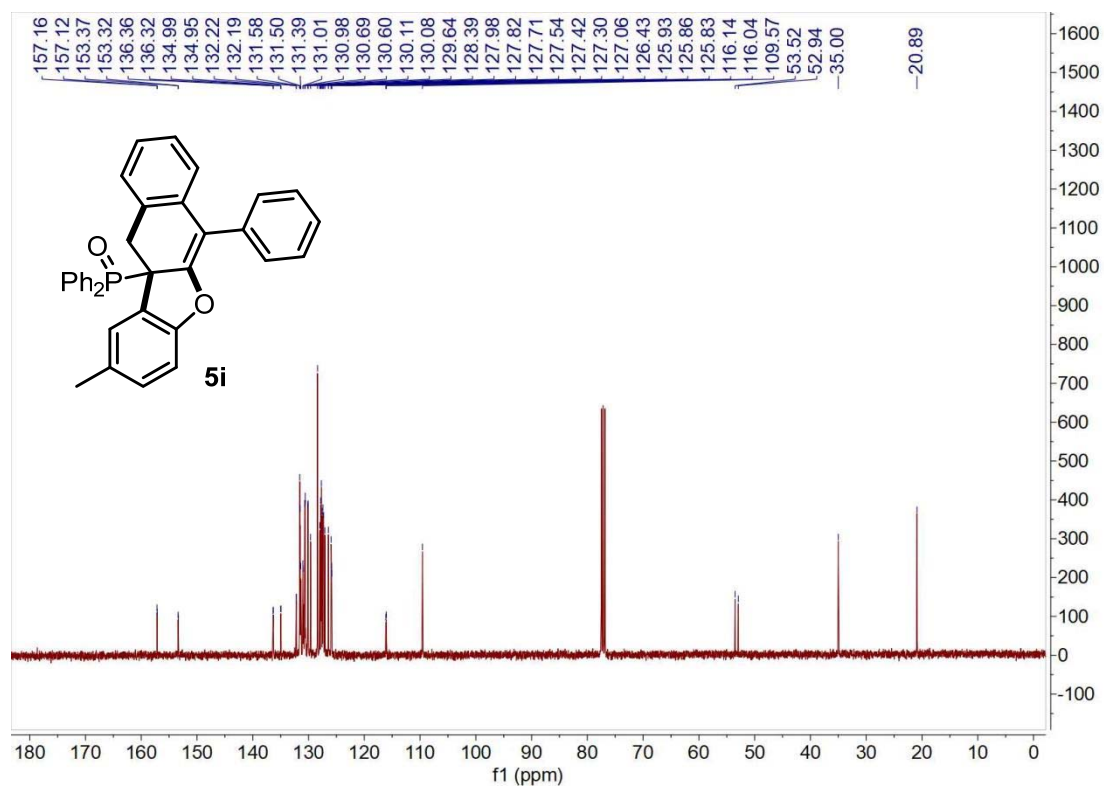

$^{13}\text{C-NMR}$  (101 MHz,  $\text{CDCl}_3$ ) of **5i**

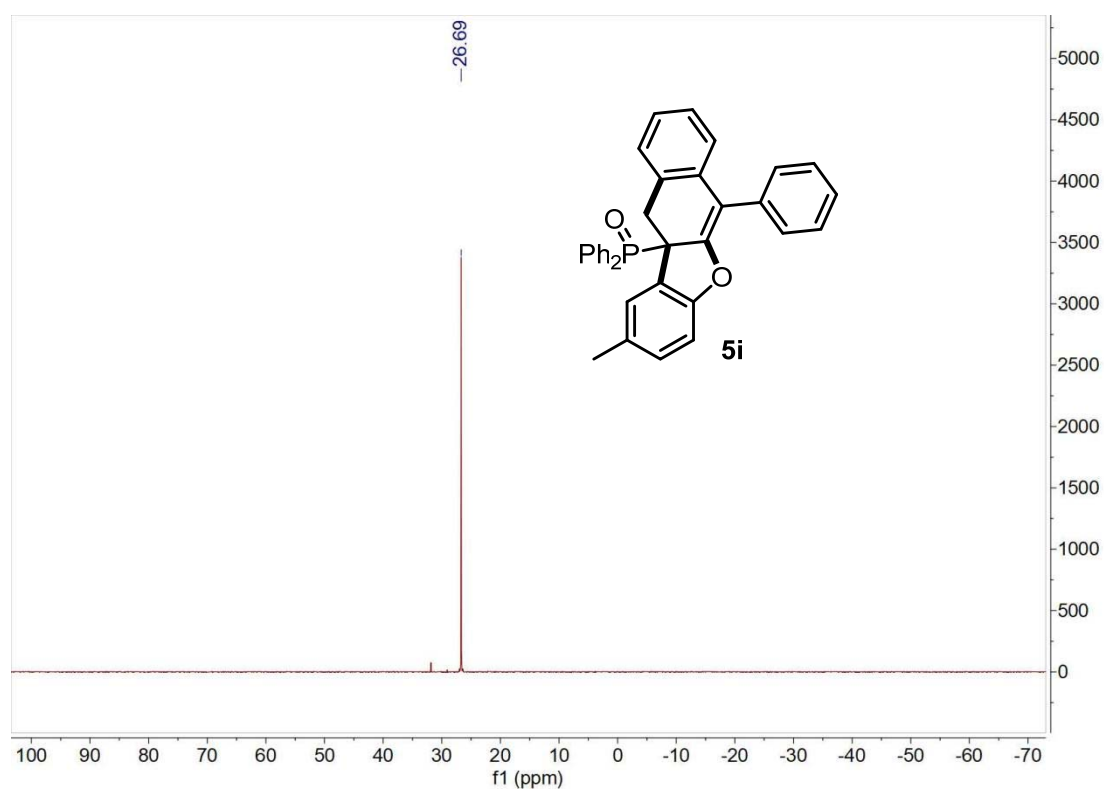

$^{31}\text{P-NMR}$  (162 MHz,  $\text{CDCl}_3$ ) of **5i**

0129-14 #15 RT: 0.23 AV: 1 NL: 4.77E5  
T: FTMS (1,1) + p ESI Full ms [100.00-1000.00]

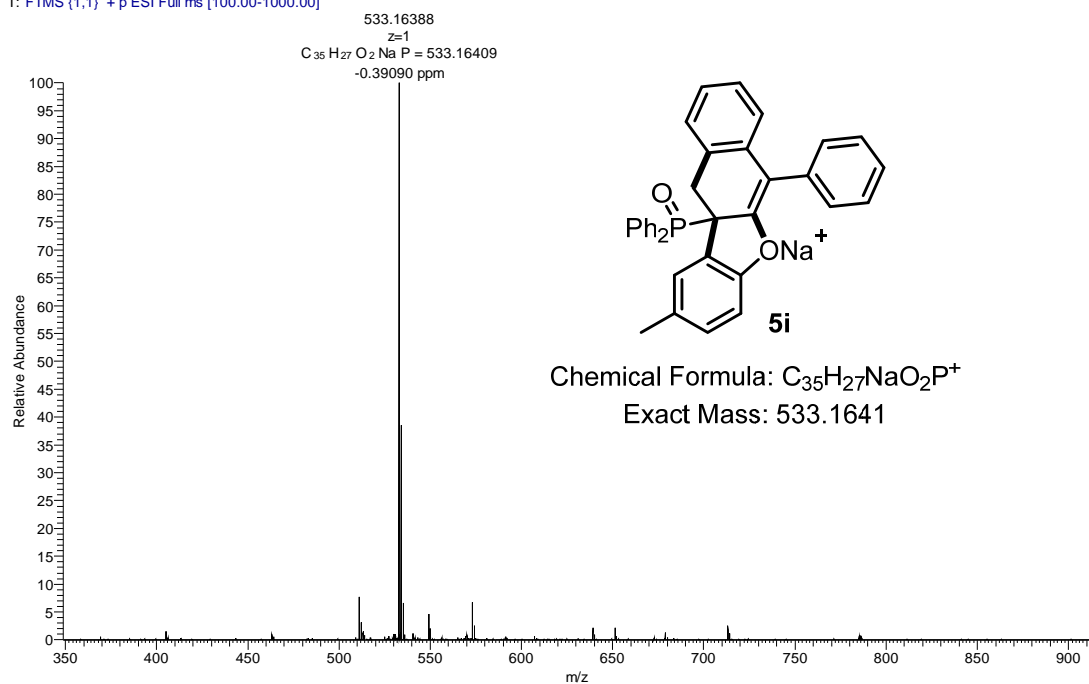

HRMS of **5i**

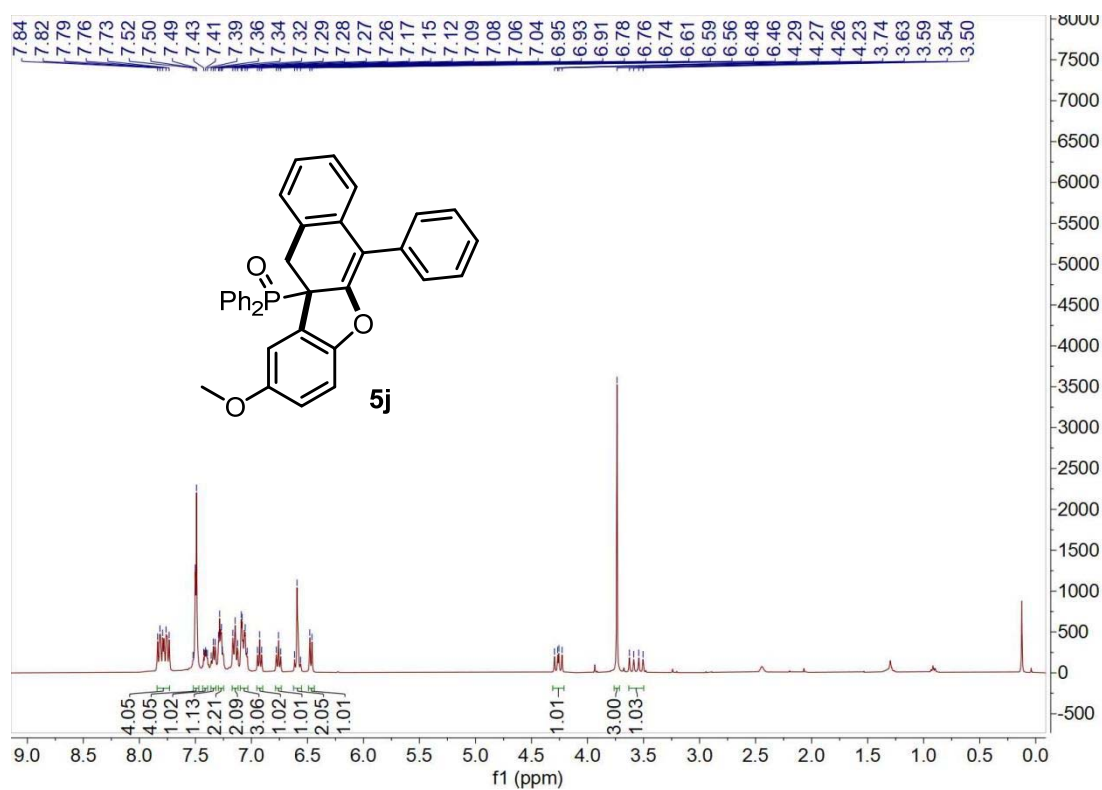

<sup>1</sup>H-NMR (400 MHz, CDCl<sub>3</sub>) of **5j**

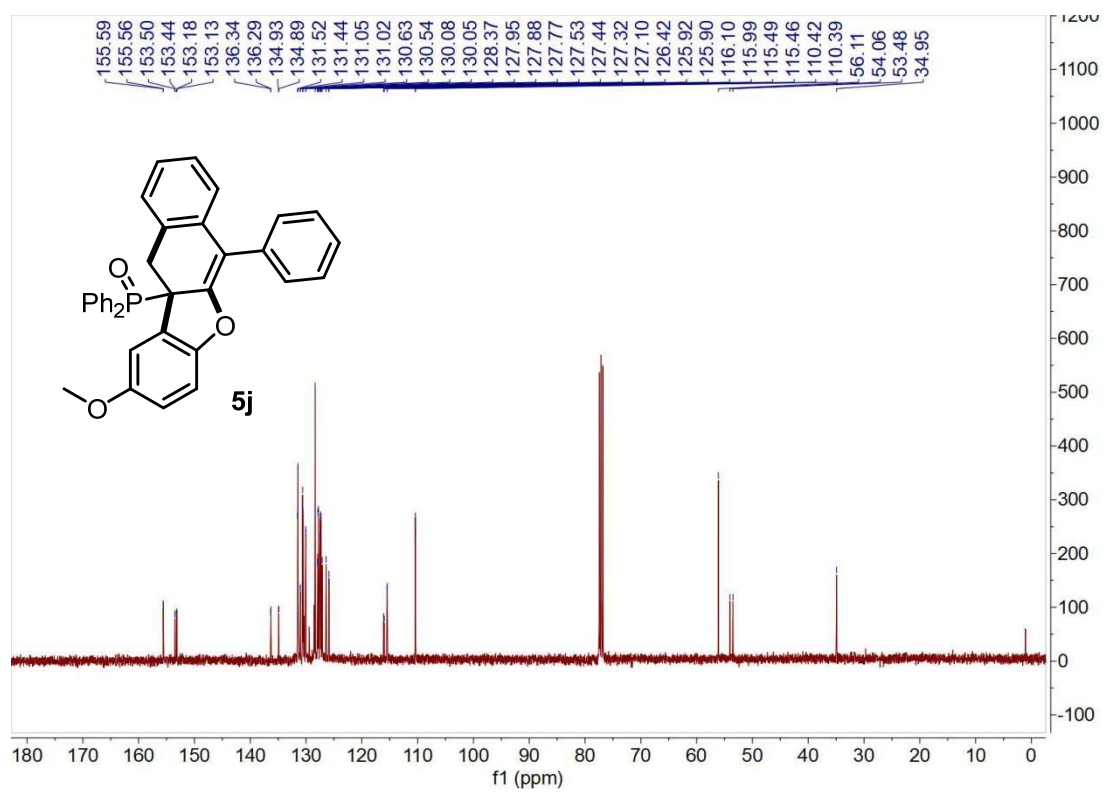

$^{13}\text{C}$ -NMR (101 MHz,  $\text{CDCl}_3$ ) of **5j**

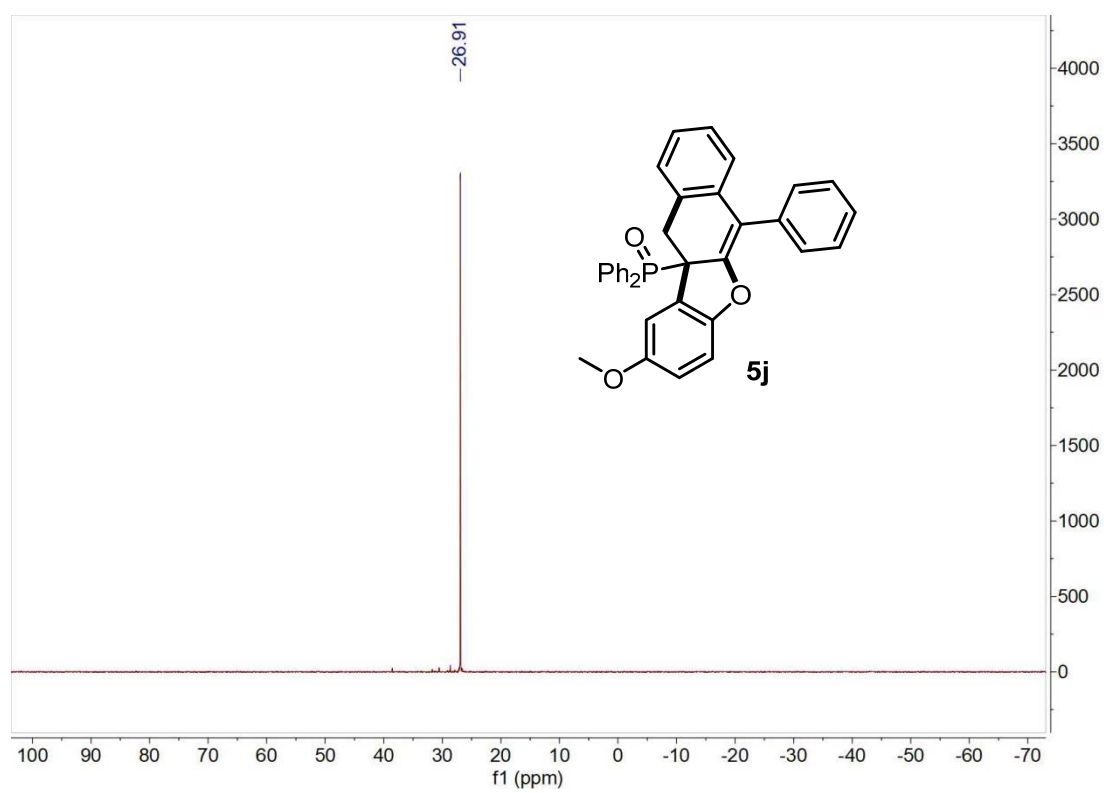

$^{31}\text{P}$ -NMR (162 MHz,  $\text{CDCl}_3$ ) of **5j**



0129-13 #21 RT: 0.27 AV: 1 NL: 2.02E5  
T: FTMS (1,1) + p ESI Full ms [100.00-1000.00]

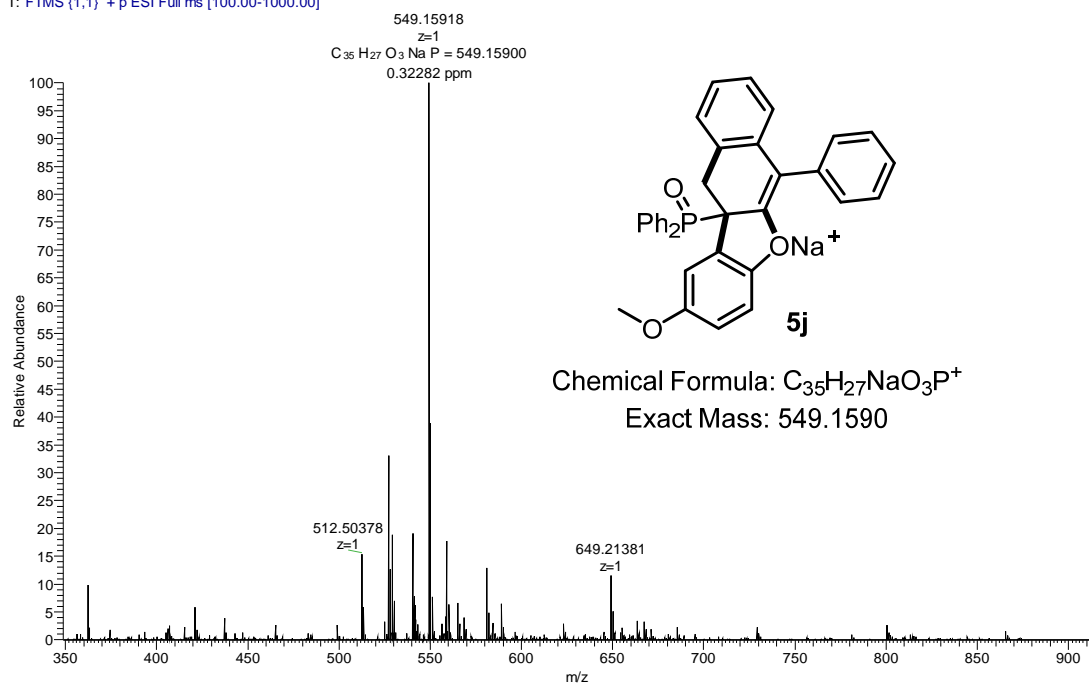

HRMS of **5j**

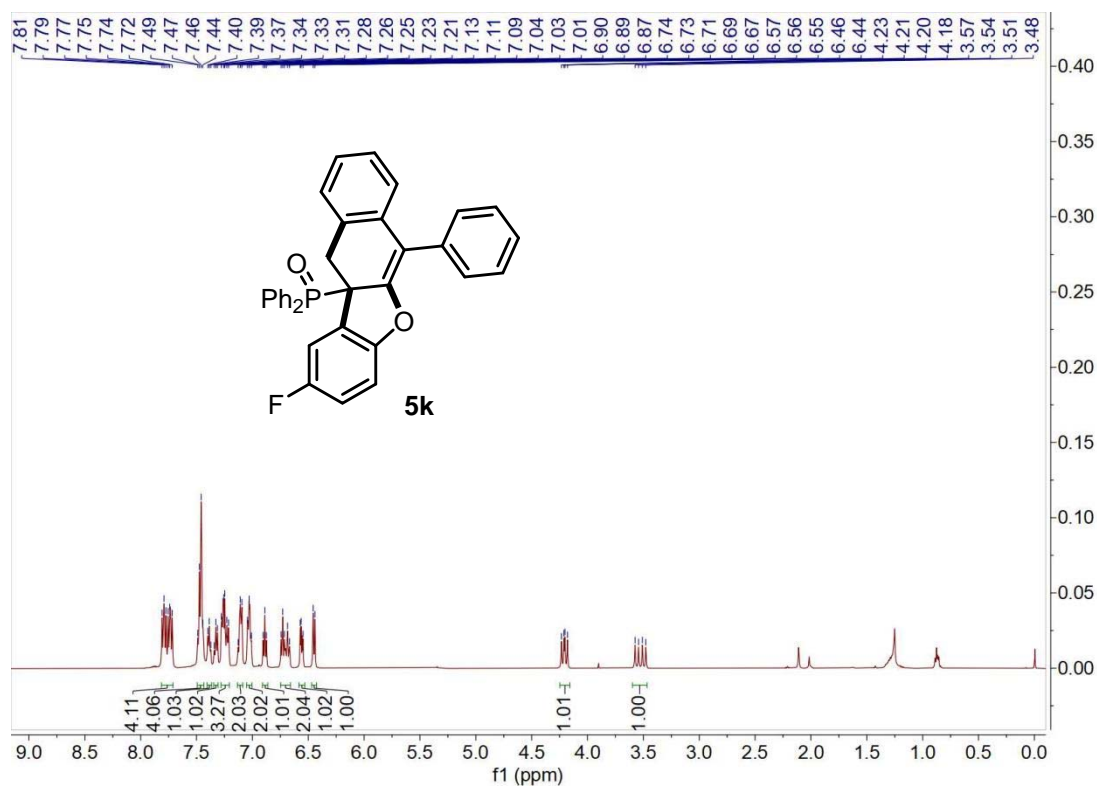

<sup>1</sup>H-NMR (500 MHz, CDCl<sub>3</sub>) of **5k**

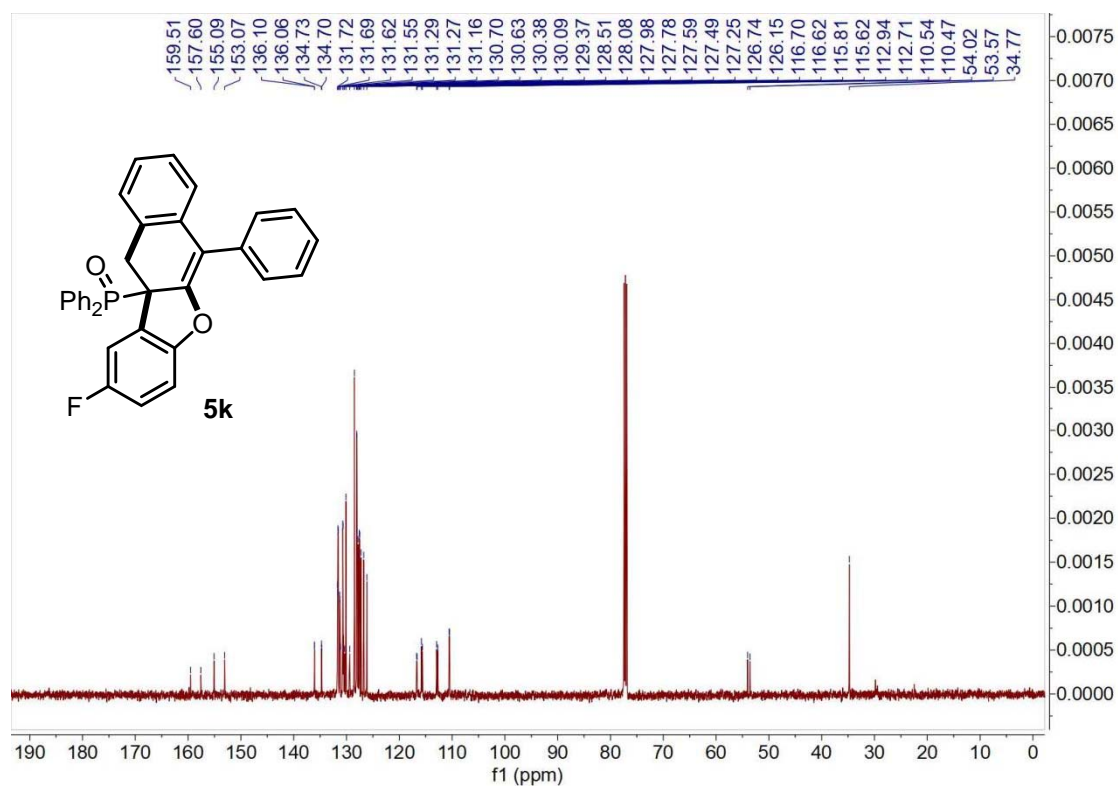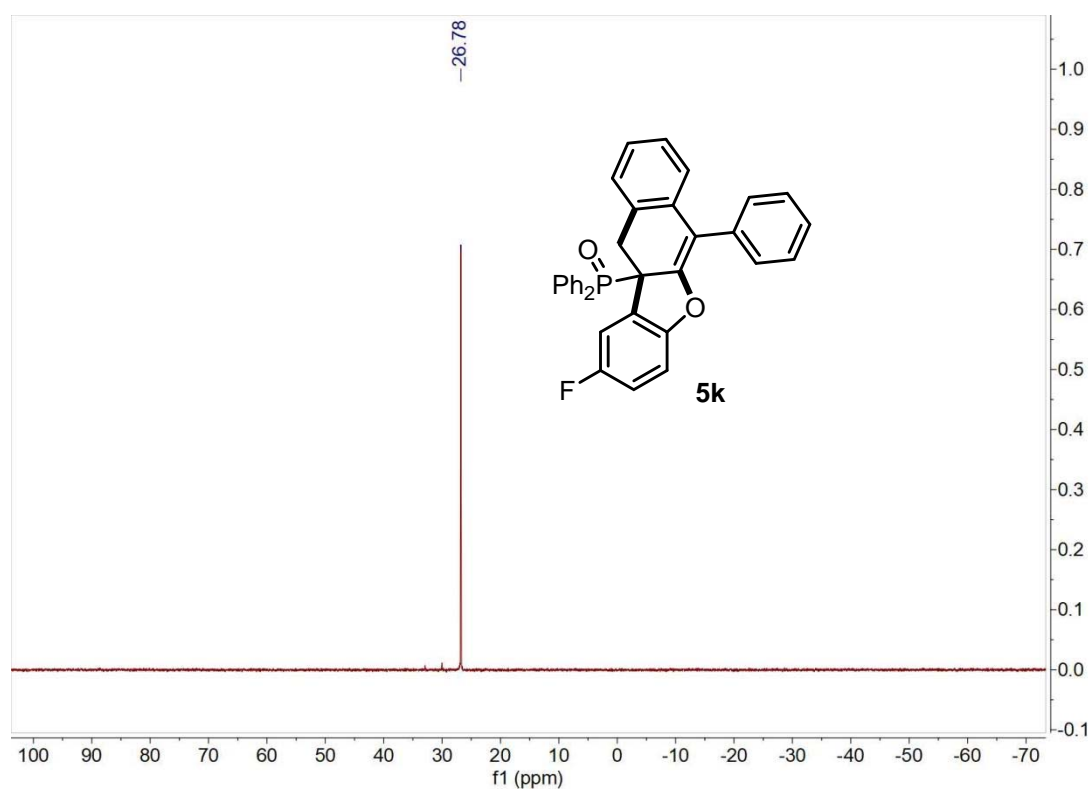

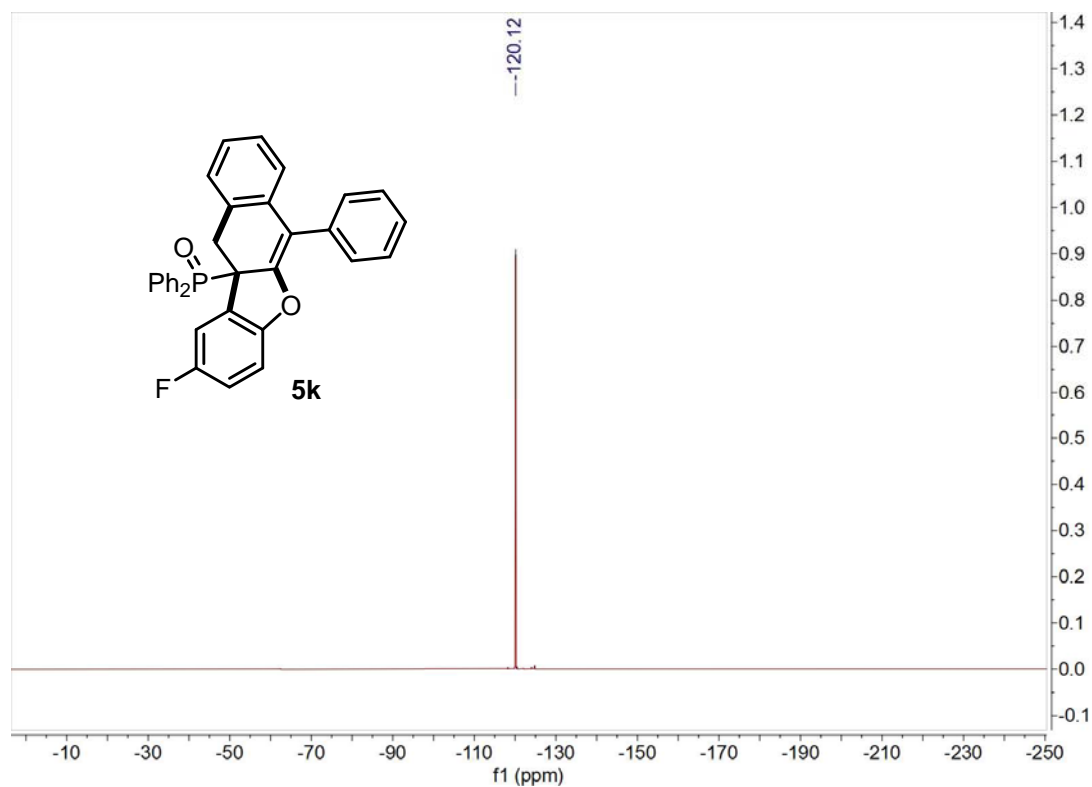

0129-12 #19 RT: 0.24 AV: 1 NL: 5.60E5  
 T: FTMS (1,1) + p ESI Full ms [100.00-1000.00]

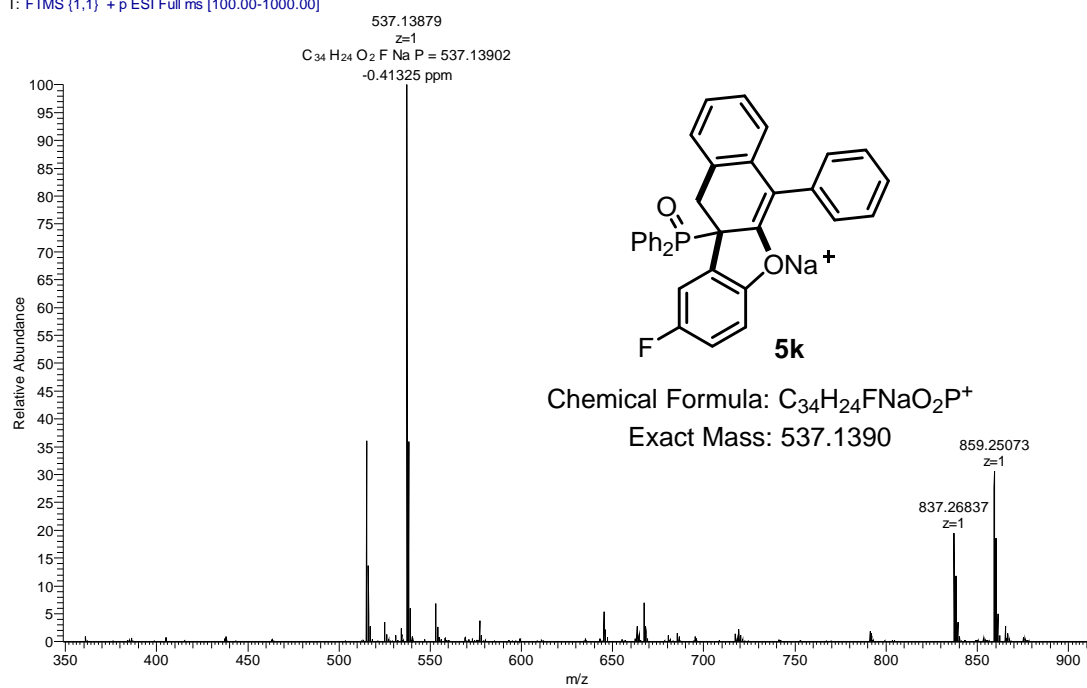

**HRMS of **5k****

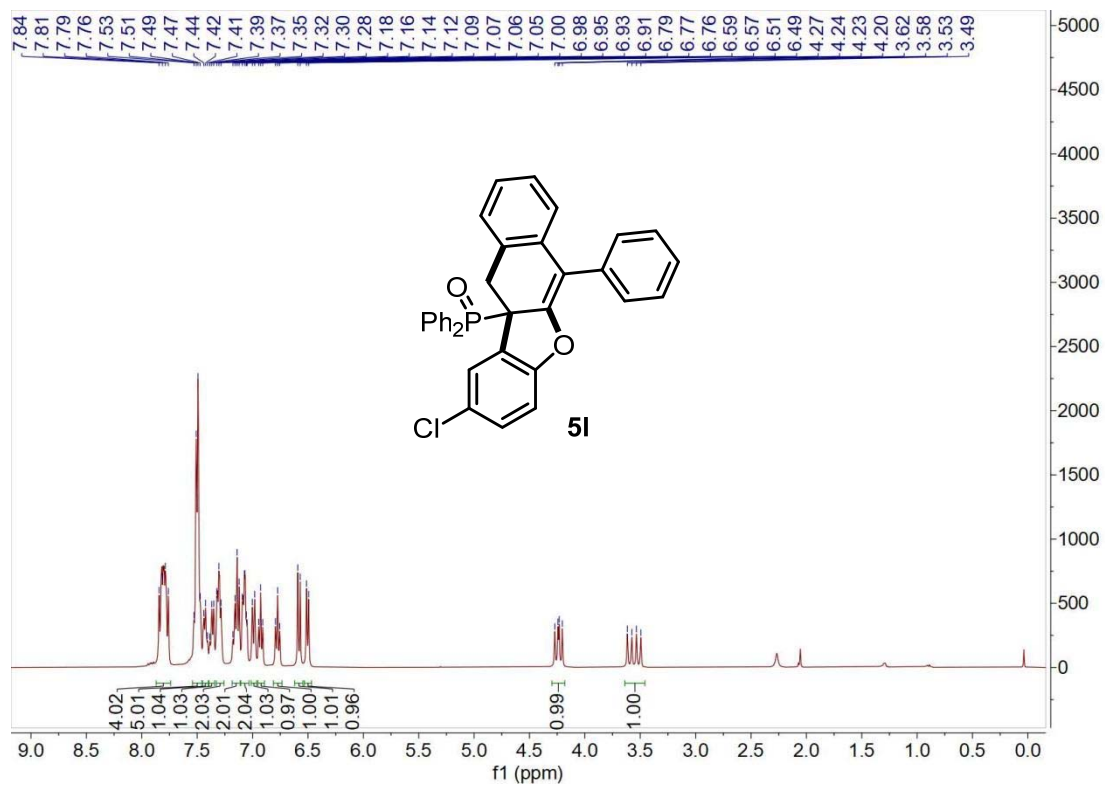

<sup>1</sup>H-NMR (400 MHz, CDCl<sub>3</sub>) of **5I**

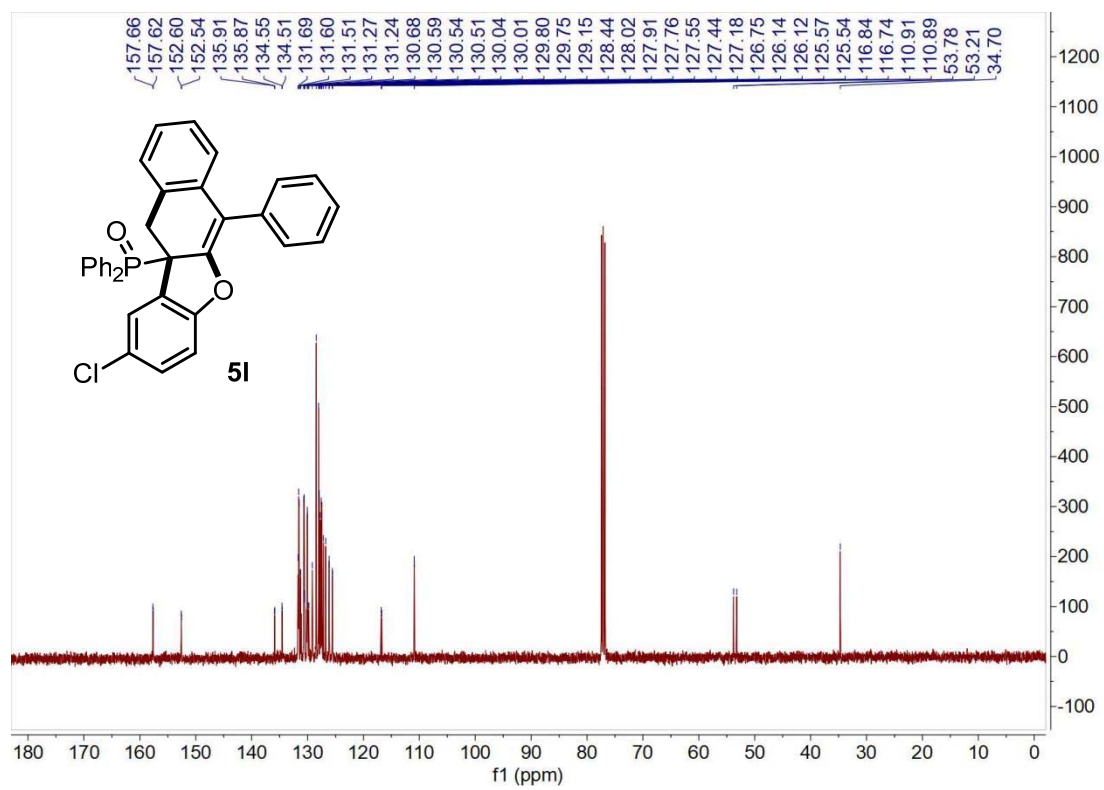

<sup>13</sup>C-NMR (101 MHz, CDCl<sub>3</sub>) of **5I**

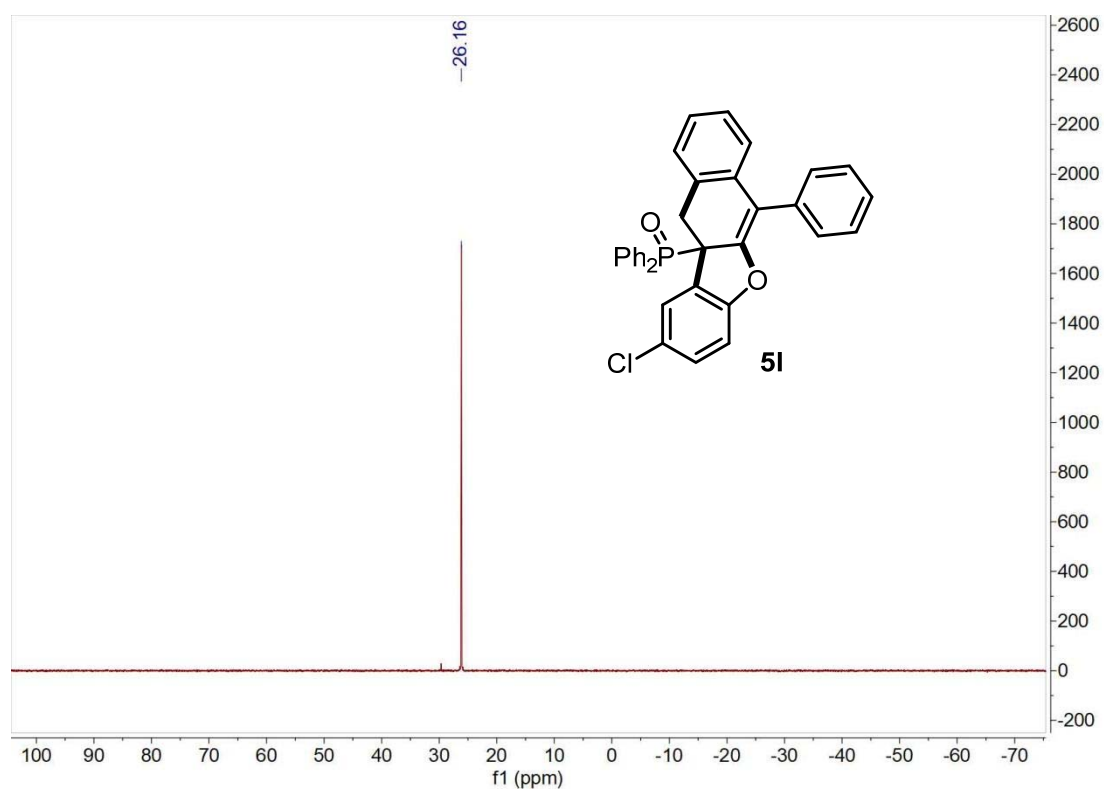

31P-NMR (162 MHz, CDCl<sub>3</sub>) of **5I**

0129-11 #23 RT: 0.29 AV: 1 NL: 1.55E5  
T: FTMS (1,1) + p ESI Full ms [100.00-1000.00]

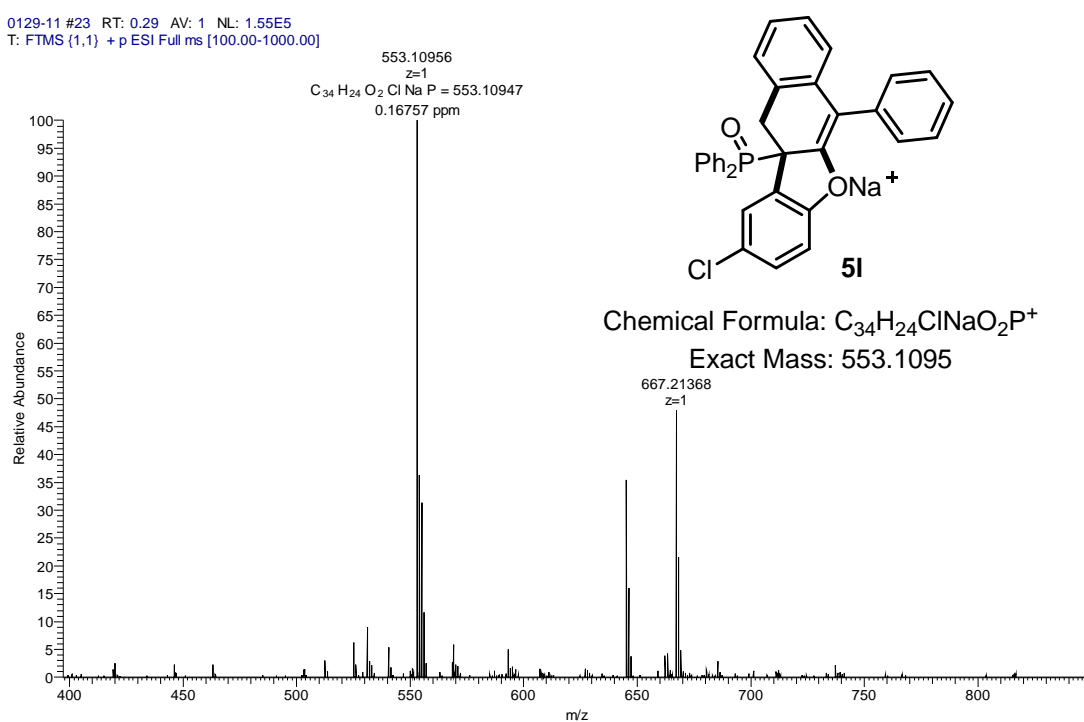

HRMS of **5I**

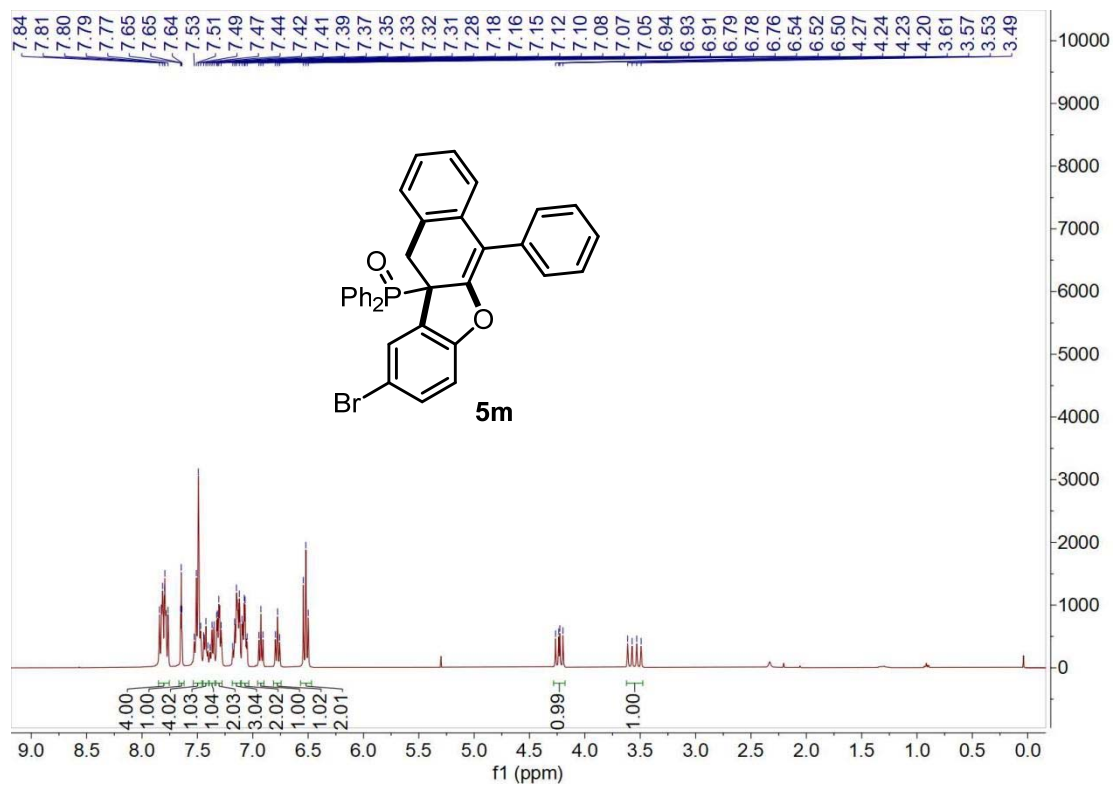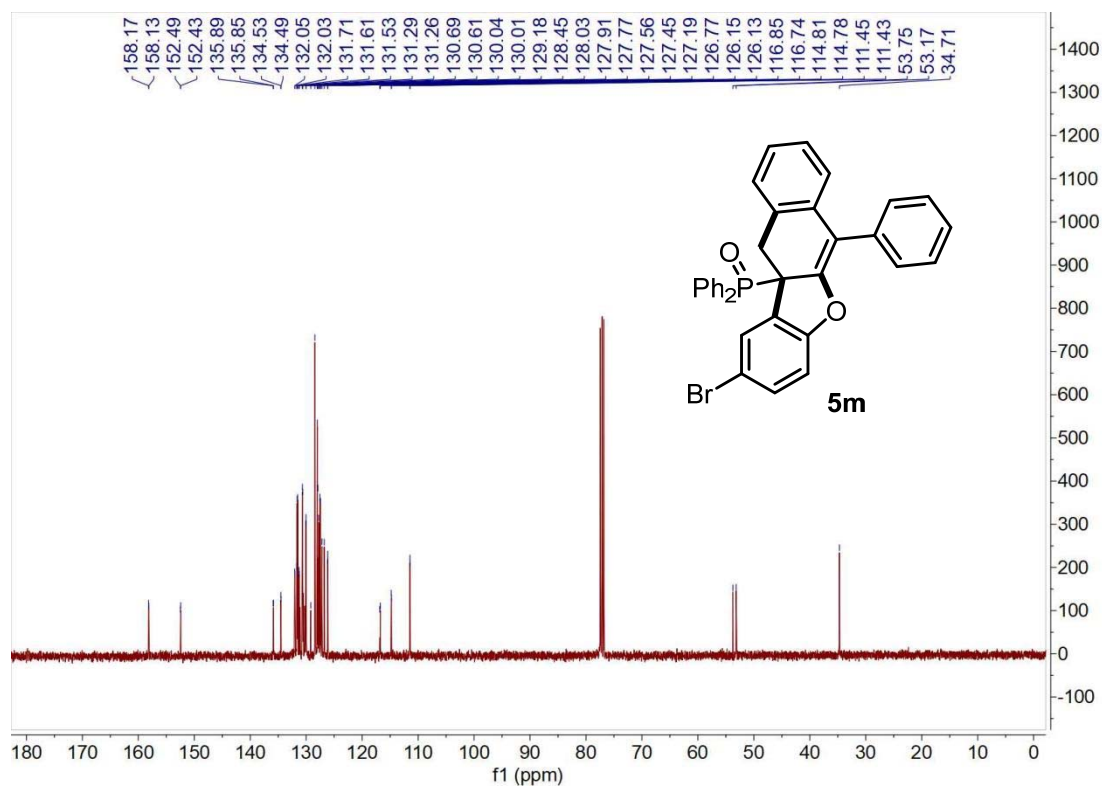

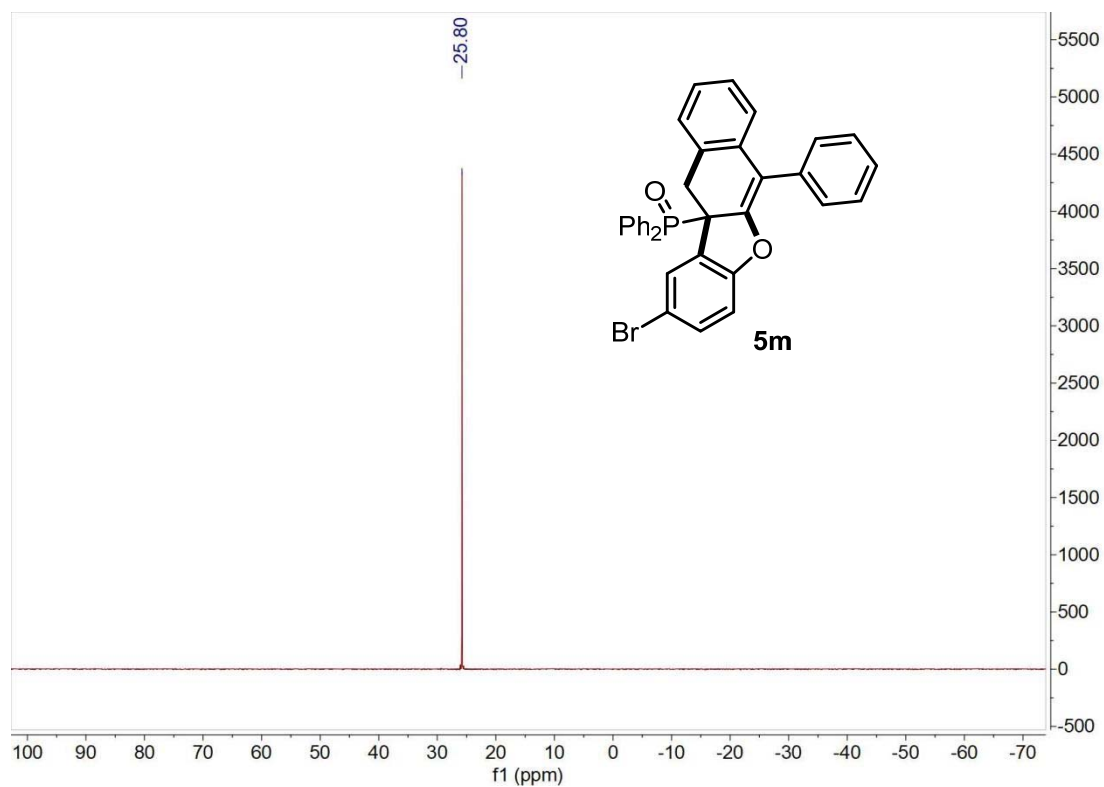

0129-10 #15 RT: 0.20 AV: 1 NL: 3.12E5  
T: FTMS (1,1) + p ESI Full ms [100.00-1000.00]

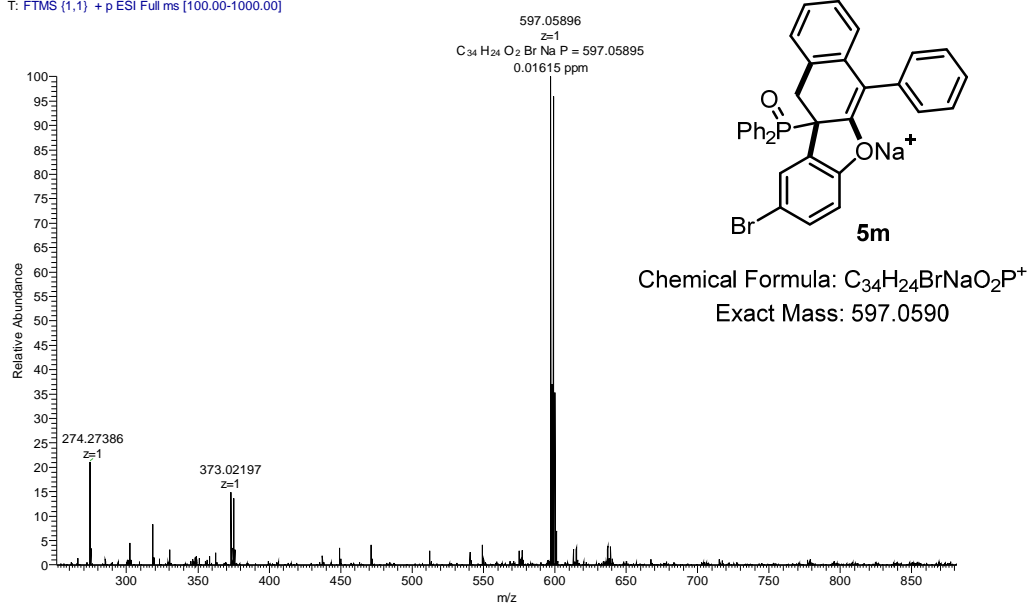

HRMS of **5m**

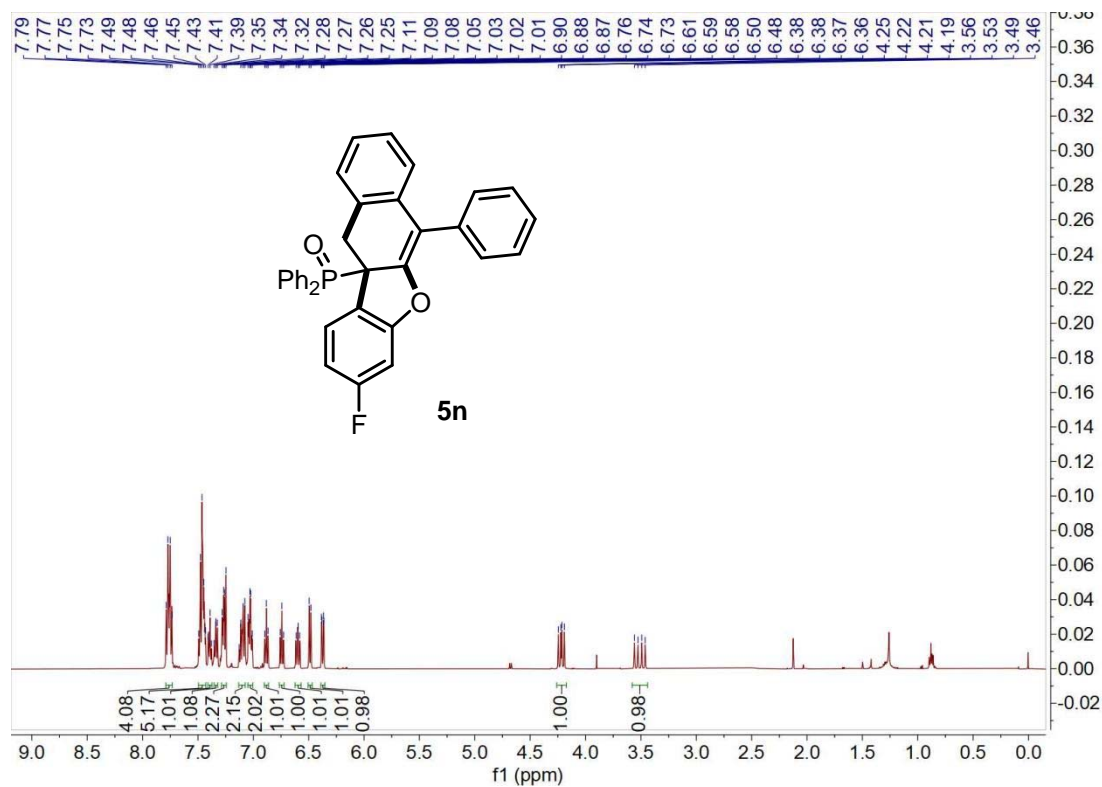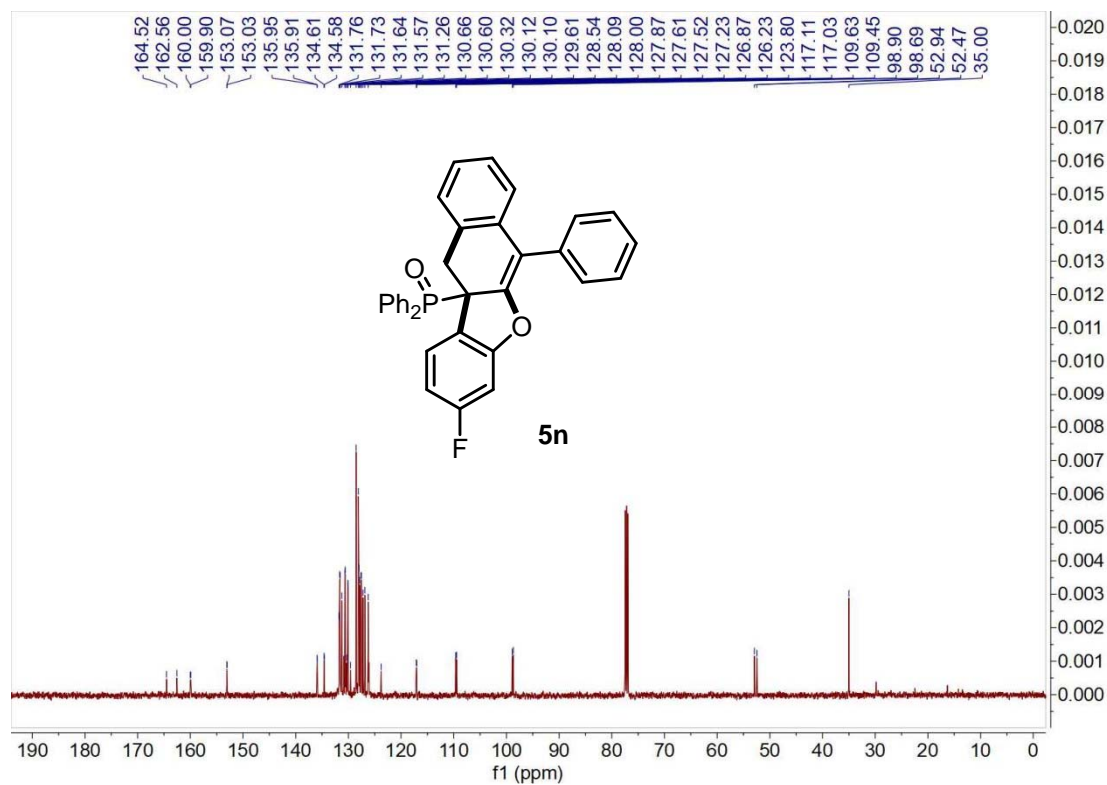



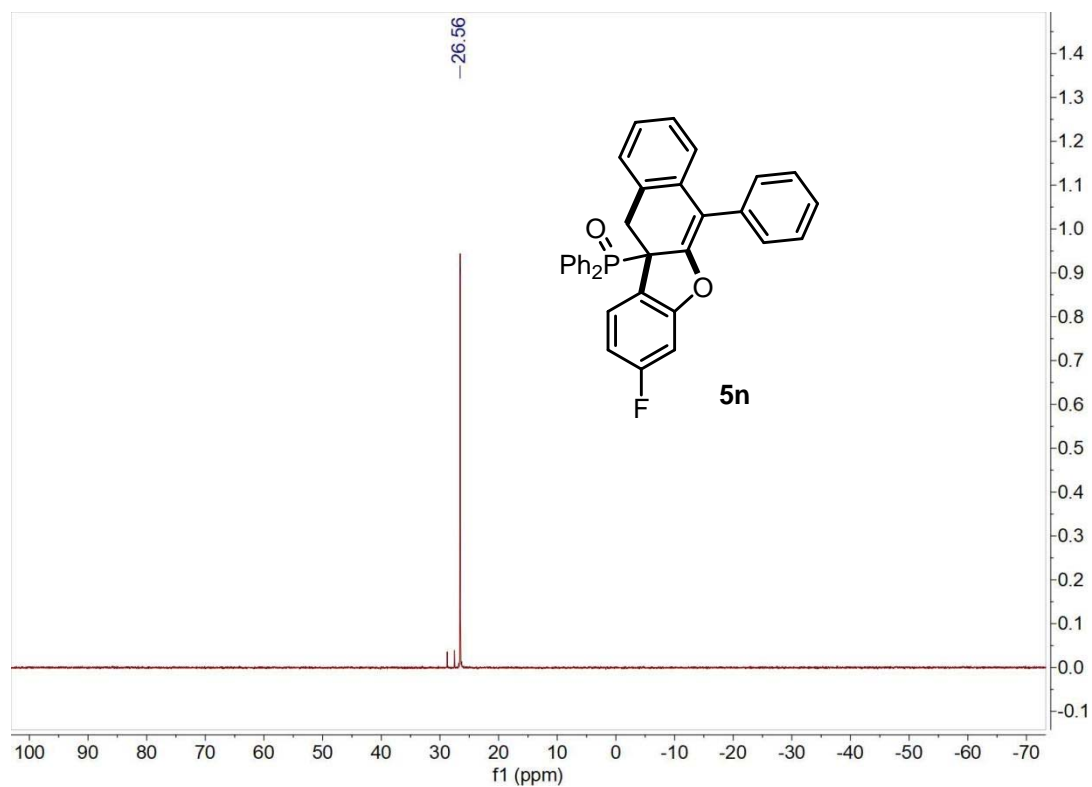

$^{31}\text{P}$ -NMR (202 MHz,  $\text{CDCl}_3$ ) of **5n**

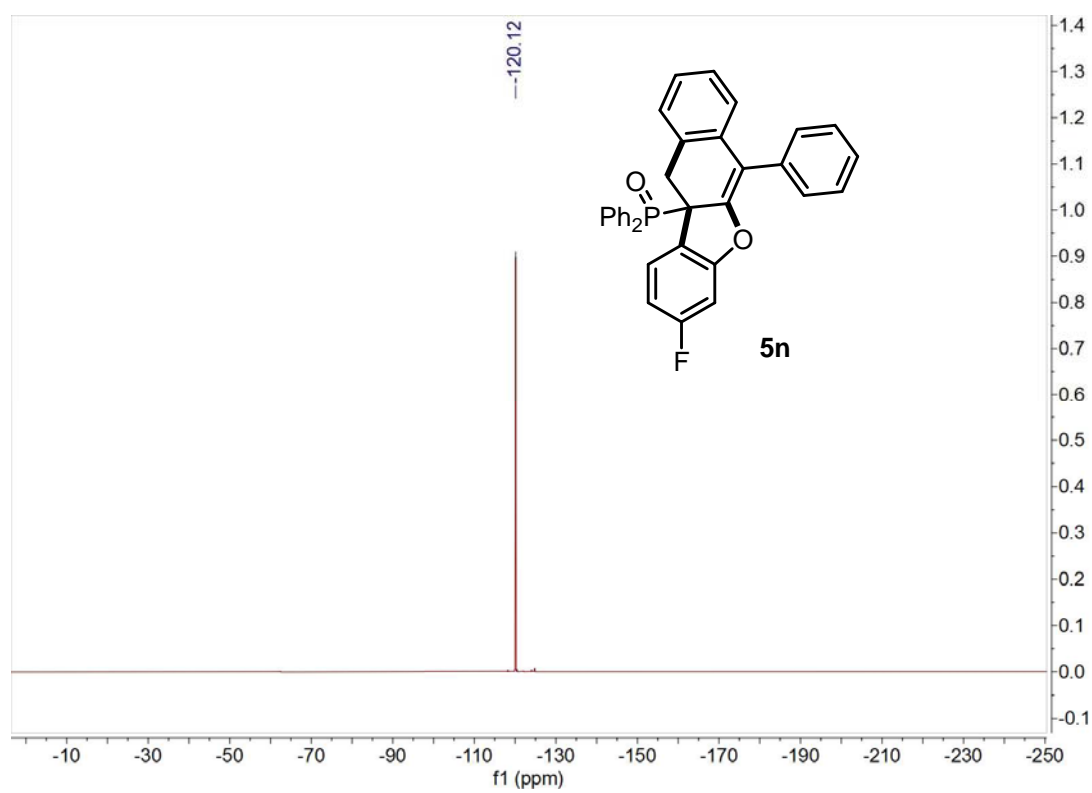

$^{19}\text{F}$ -NMR (471 MHz,  $\text{CDCl}_3$ ) of **5n**

Spectrum from 02.wiff (sample 1) - Sample008, Experiment 1, +TOF MS (80 - 1000) from 0.436 to 0.480 min

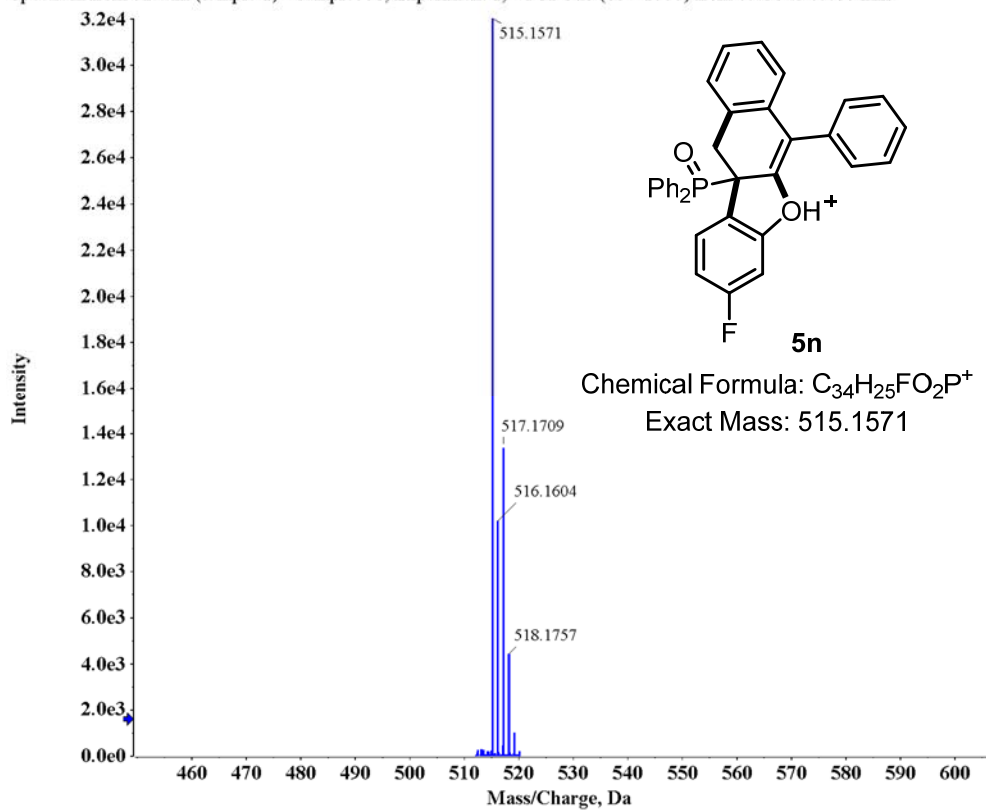

HRMS of **5n**

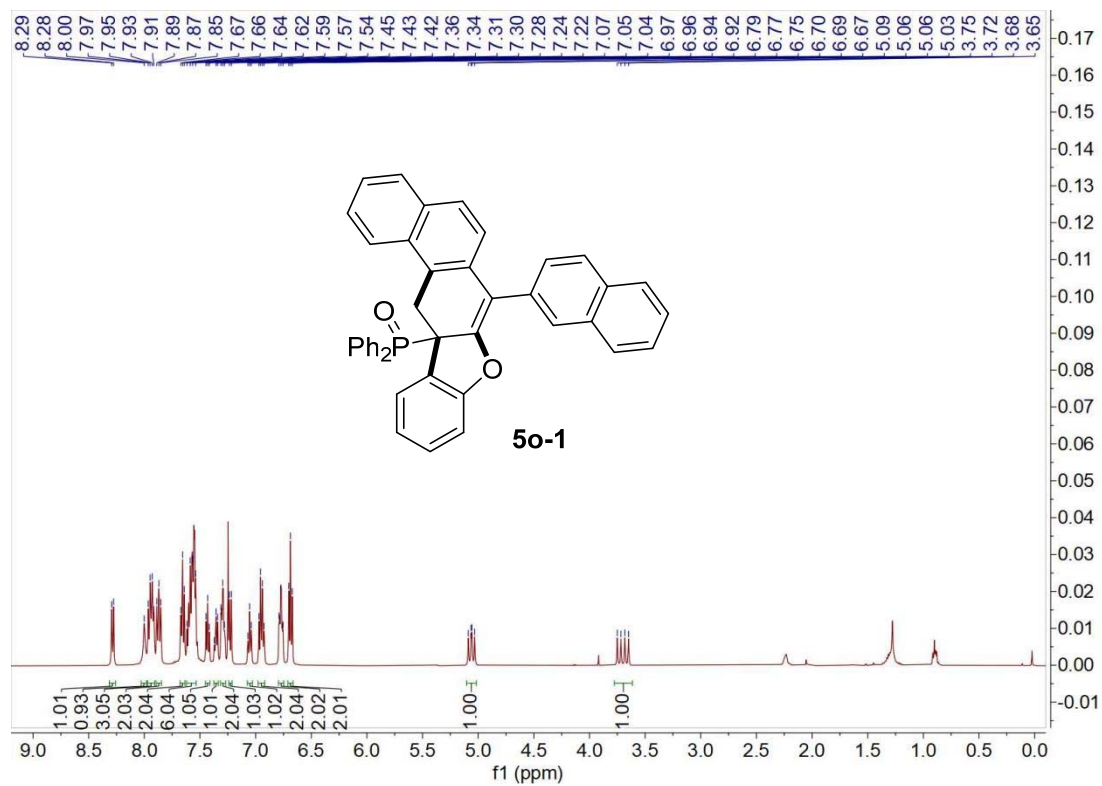

$^1H$ -NMR (500 MHz,  $CDCl_3$ ) of **5o-1**

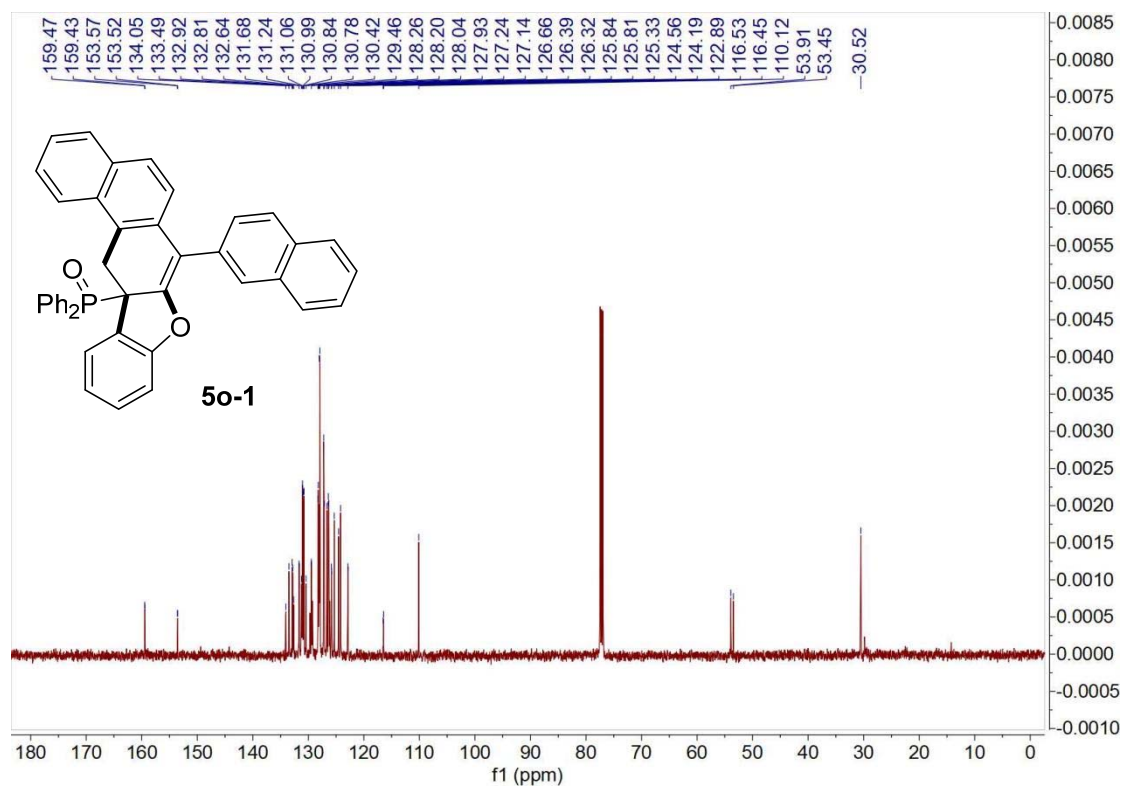

$^{13}\text{C}$ -NMR (126 MHz,  $\text{CDCl}_3$ ) of **5o-1**

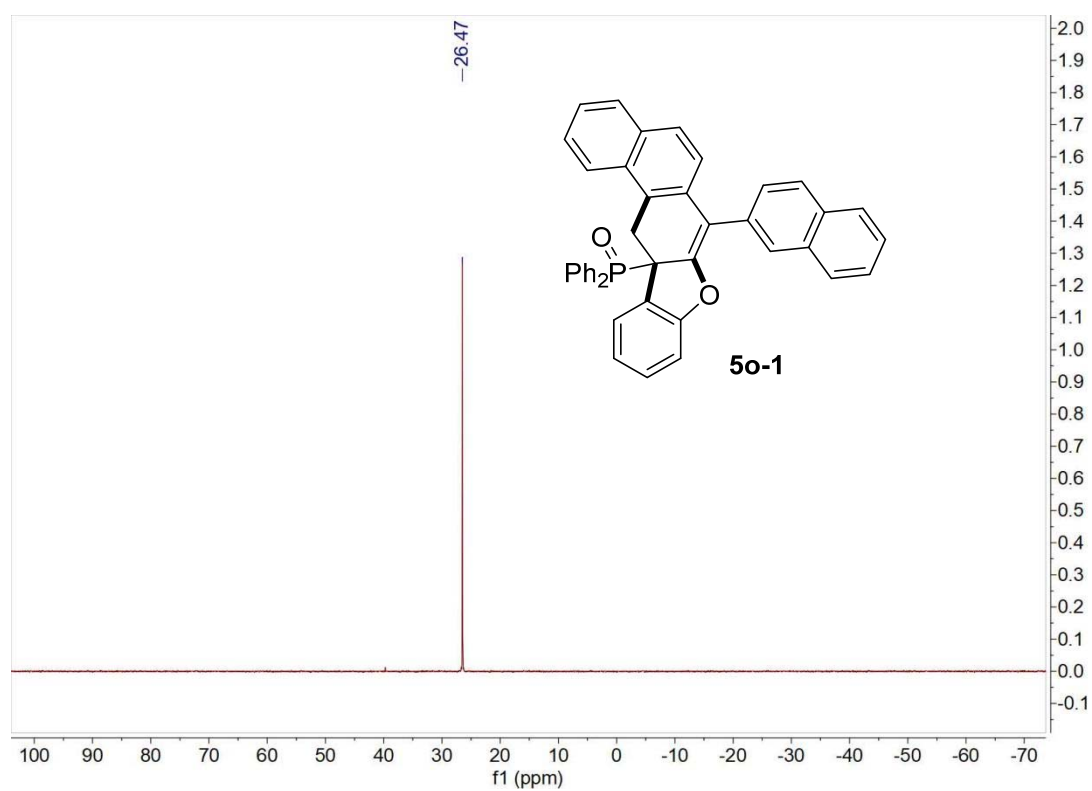

$^{31}\text{P}$ -NMR (202 MHz,  $\text{CDCl}_3$ ) of **5o-1**

Spectrum from 03.wiff (sample 1) - Sample009, Experiment 1, +TOF MS (80 - 1000) from 1.011 to 1.056 min

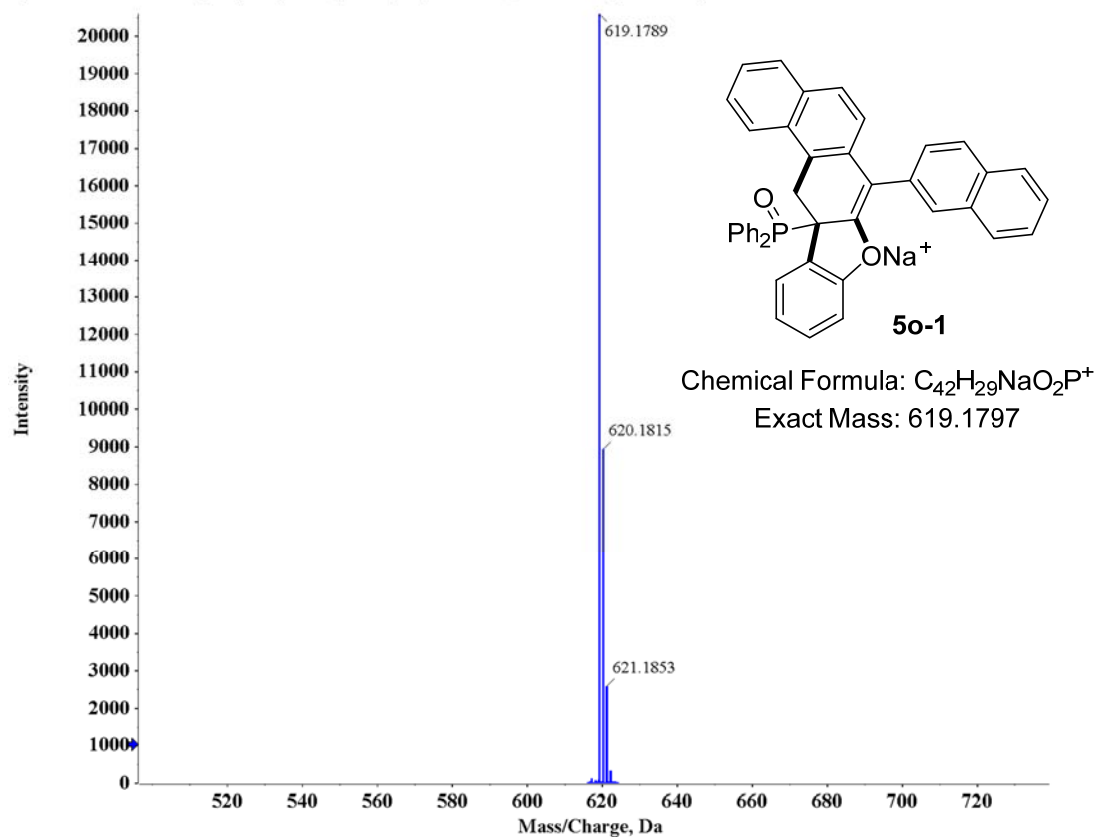

HRMS of **5o-1**

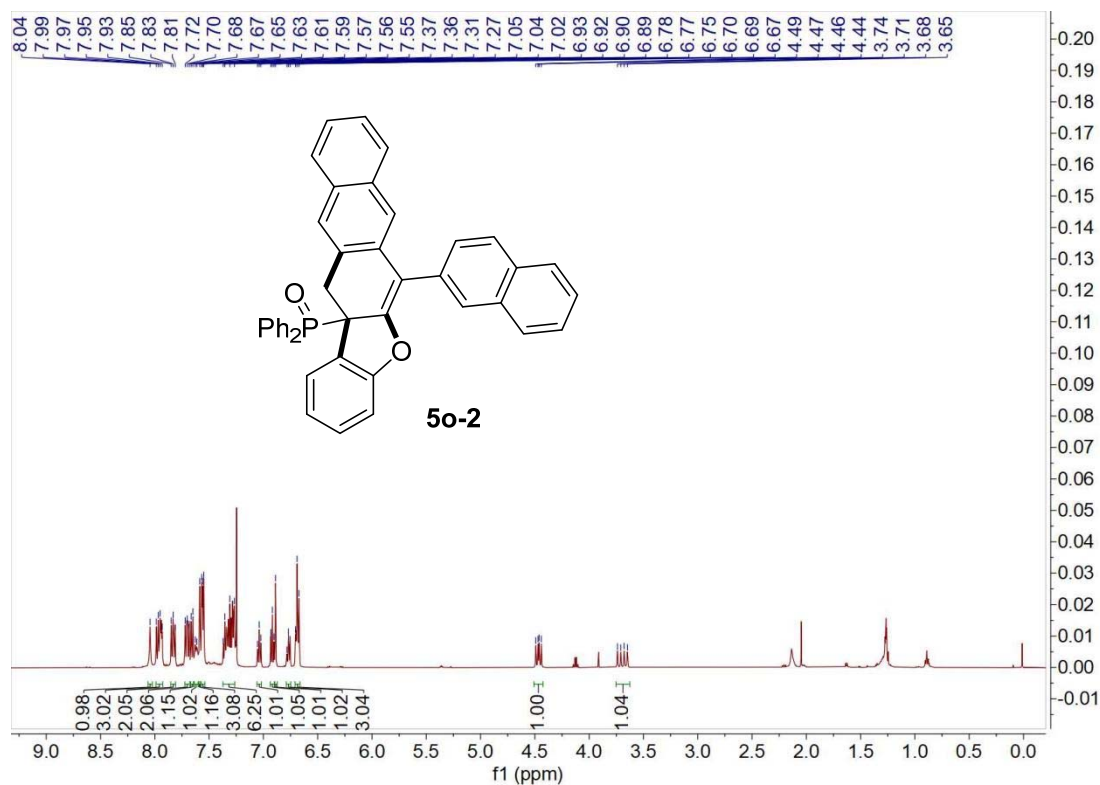

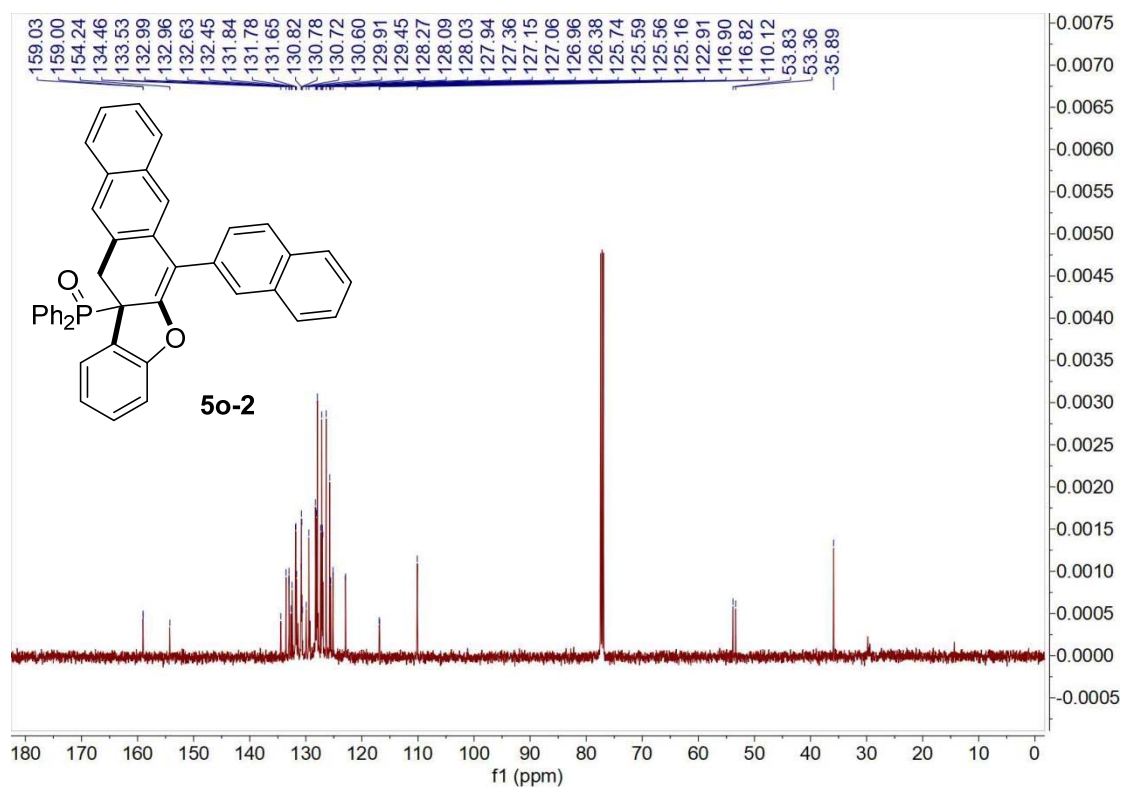

$^{13}\text{C}$ -NMR (126 MHz,  $\text{CDCl}_3$ ) of **5o-2**

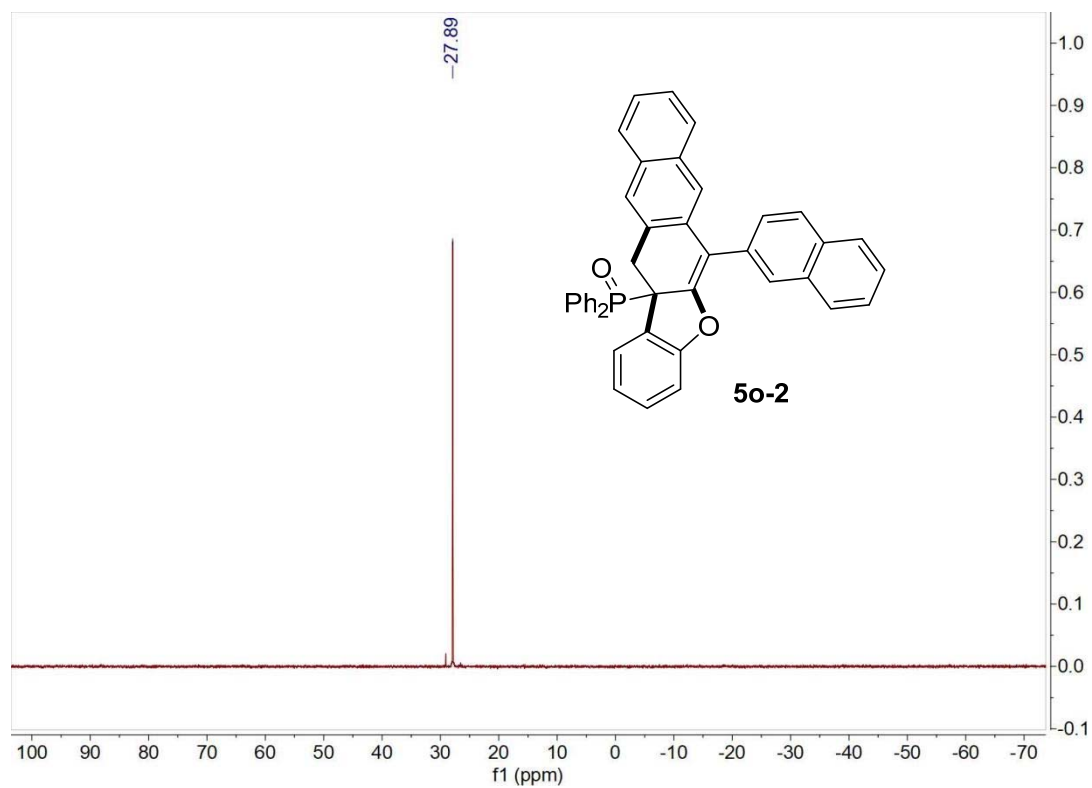

$^{31}\text{P}$ -NMR (202 MHz,  $\text{CDCl}_3$ ) of **5o-2**

Spectrum from 04.wiff (sample 1) - Sample010, Experiment 1, +TOF MS (80 - 1000) from 1.433 to 1.477 min

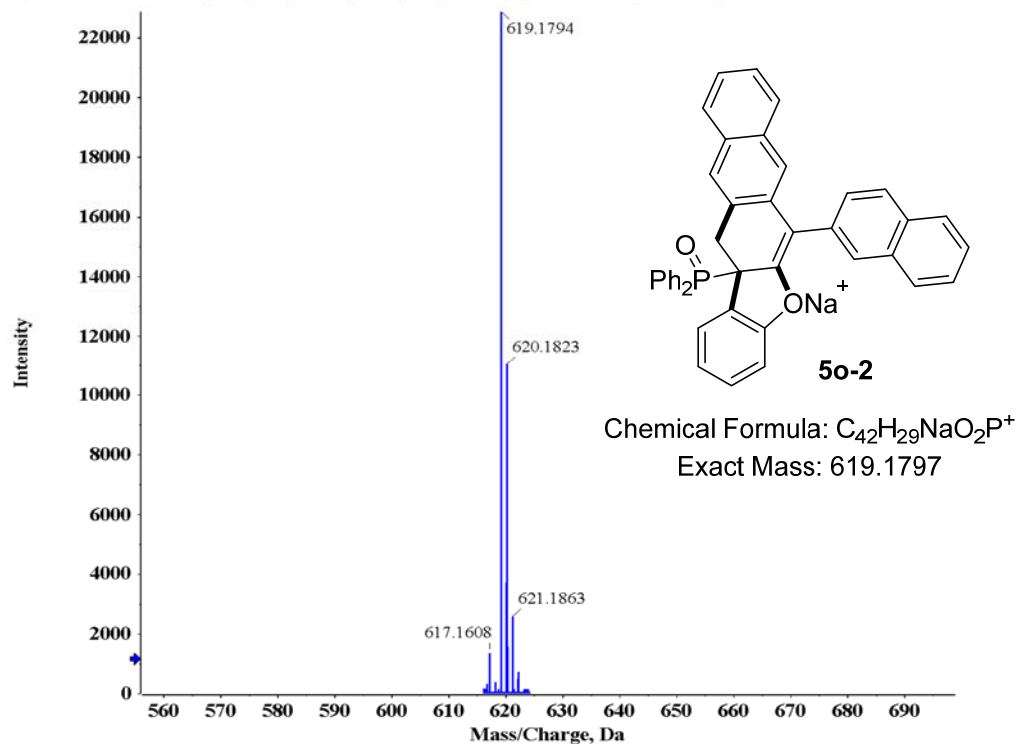

HRMS of **5o-2**

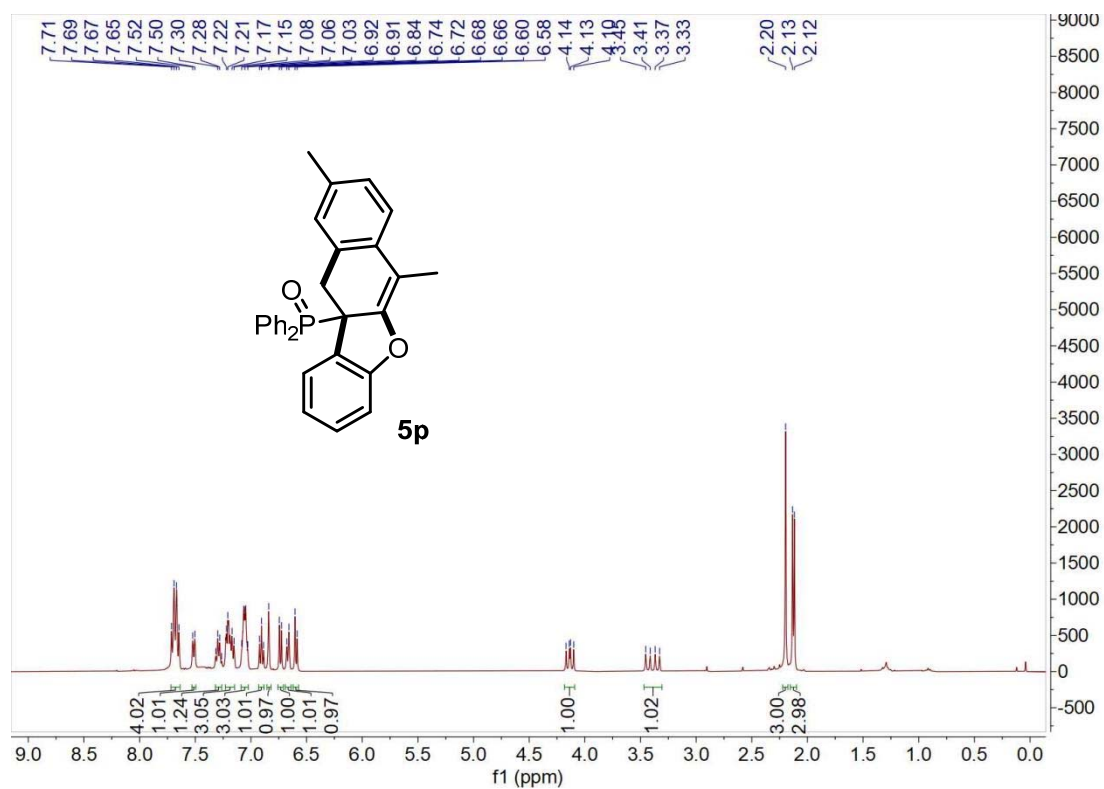

$^1H$ -NMR (400 MHz,  $CDCl_3$ ) of **5p**

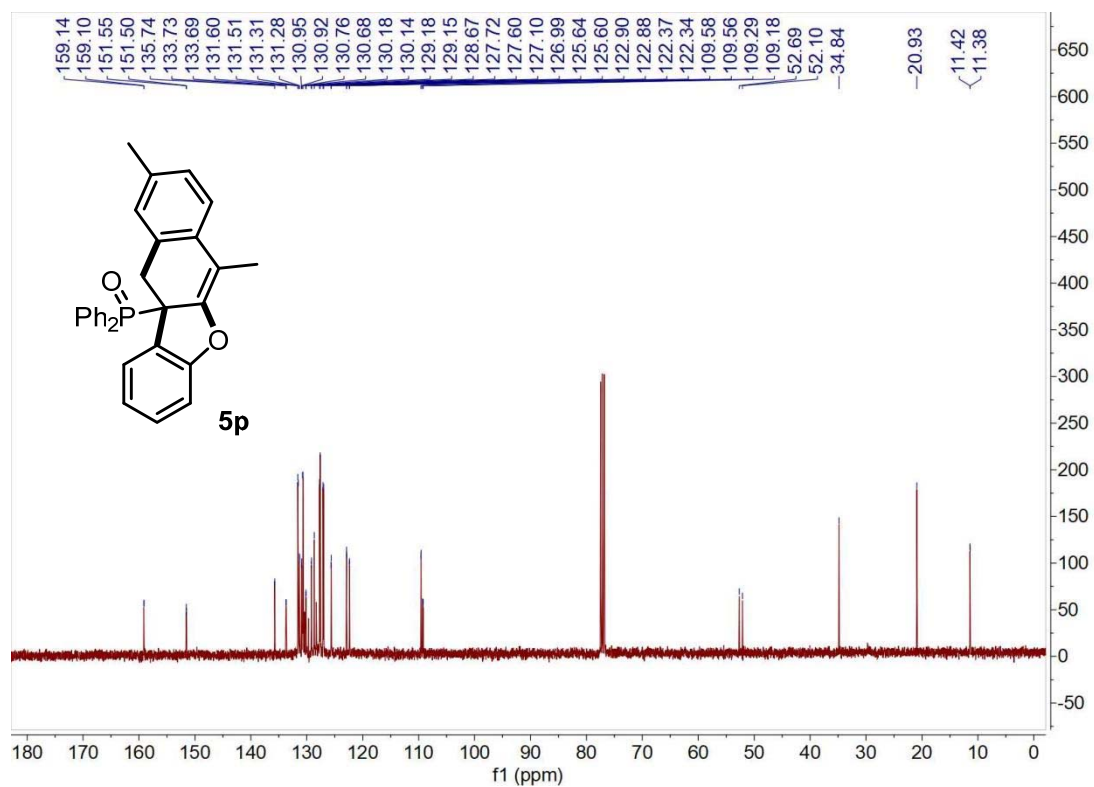

$^{13}\text{C}$ -NMR (101 MHz,  $\text{CDCl}_3$ ) of **5p**

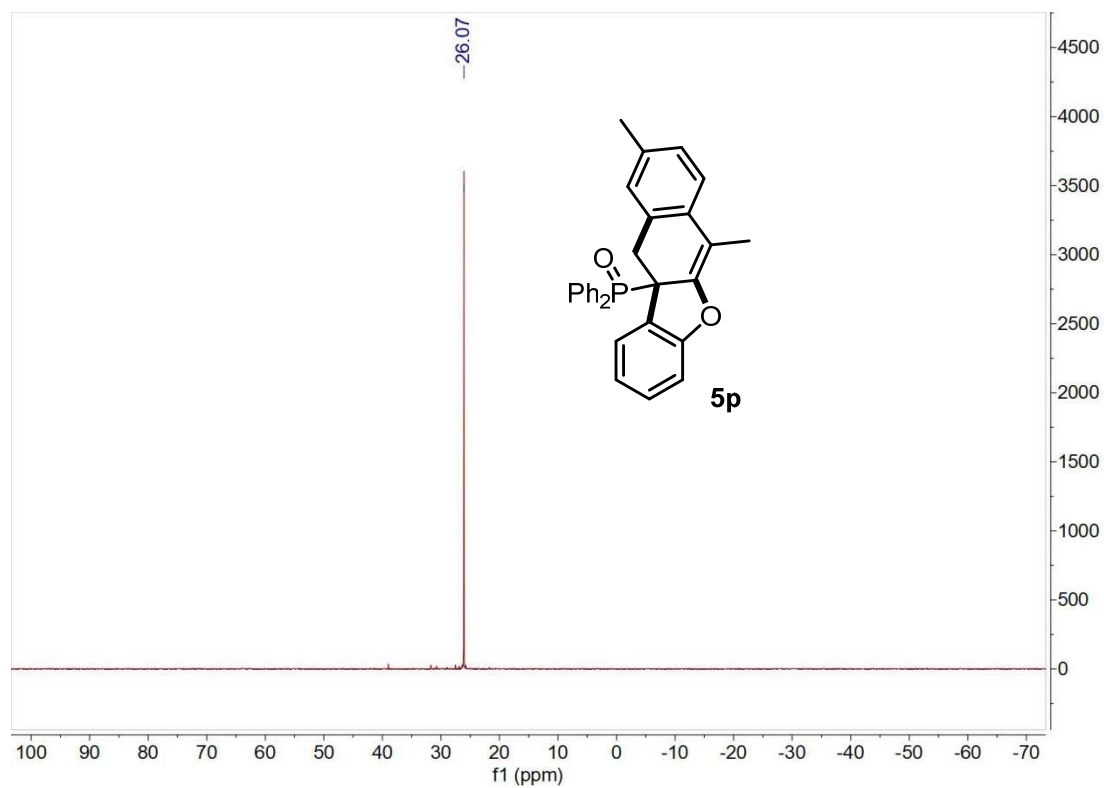

$^{31}\text{P}$ -NMR (162 MHz,  $\text{CDCl}_3$ ) of **5p**

20210118-27 #31 RT: 0.39 AV: 1 NL: 1.77E5  
T: FTMS (1,1) + p ESI Full ms [100.00-1000.00]

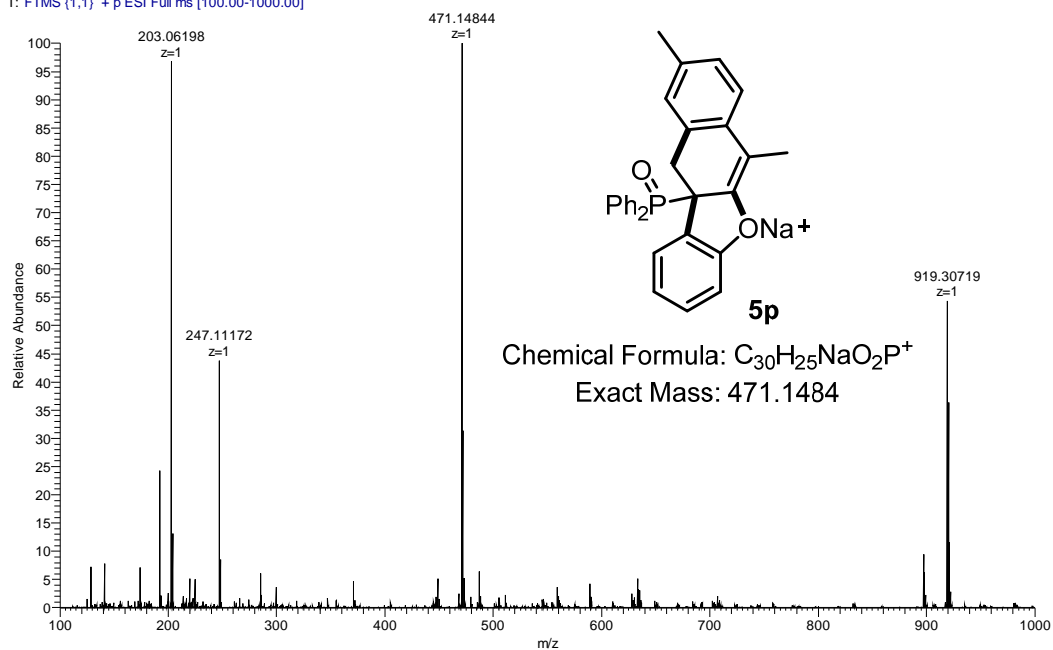

HRMS of **5p**

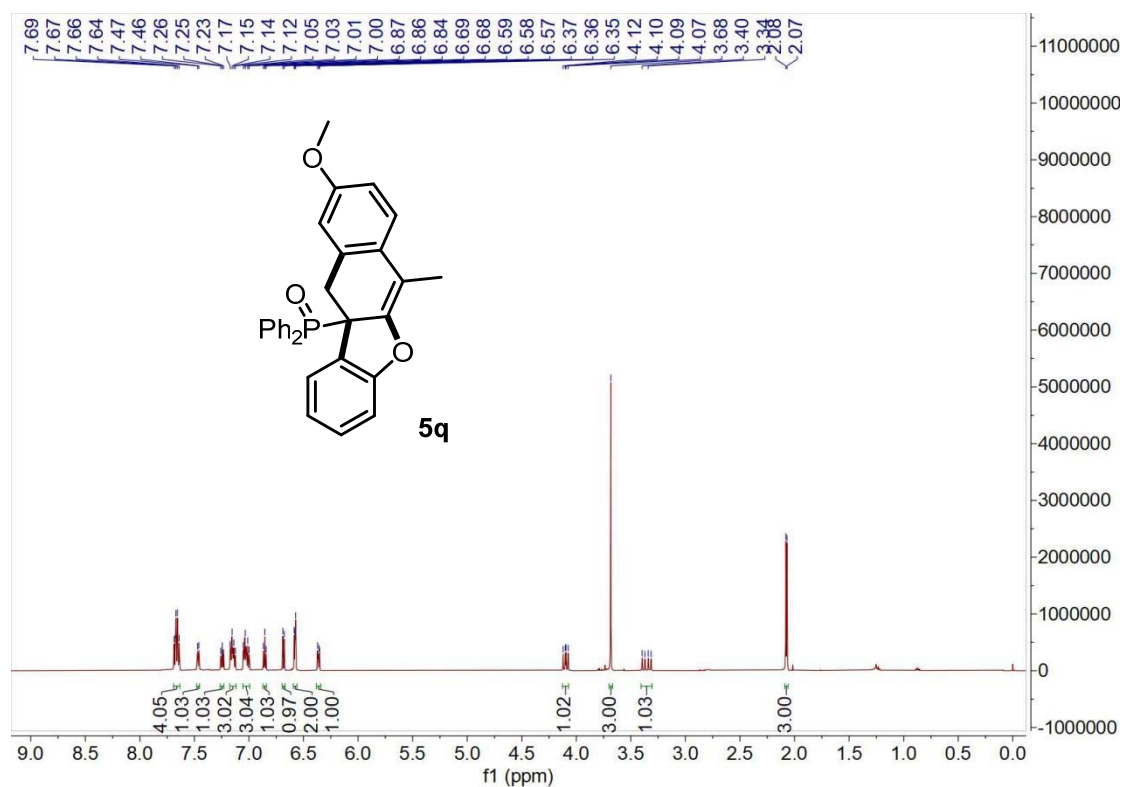

$^1H$ -NMR (600 MHz,  $CDCl_3$ ) of **5q**



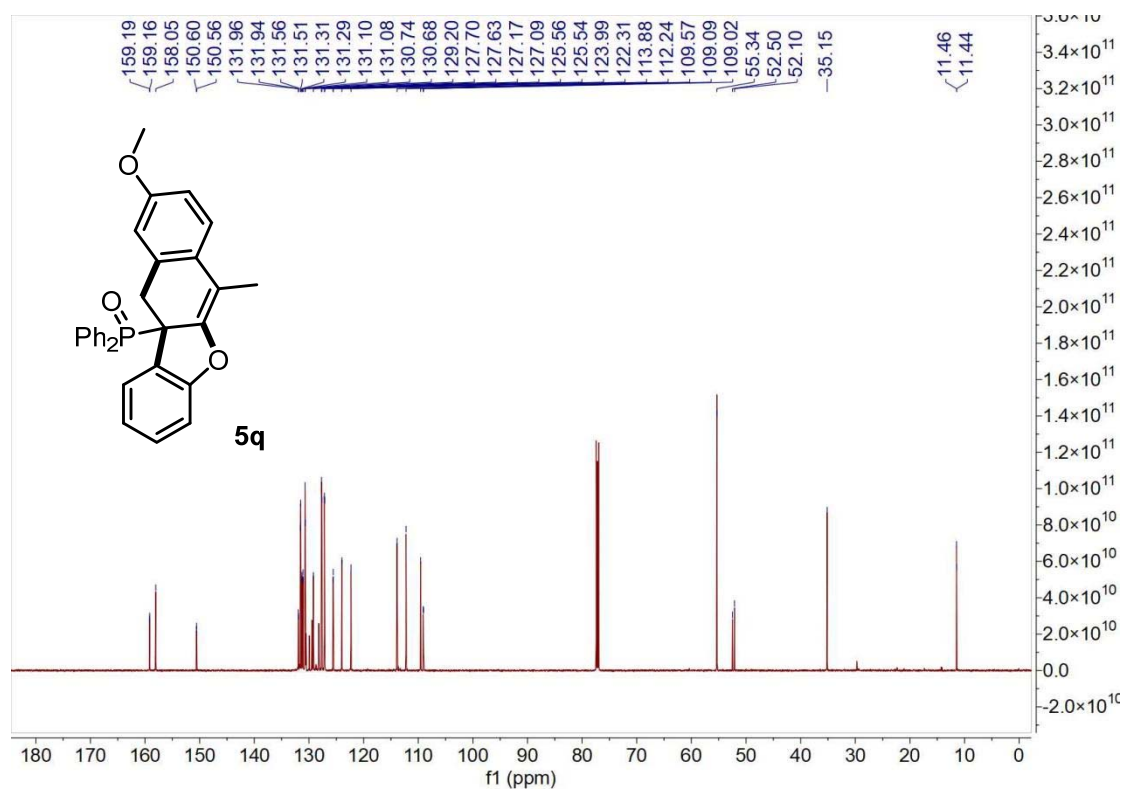

$^{13}\text{C}$ -NMR (151 MHz,  $\text{CDCl}_3$ ) of **5q**

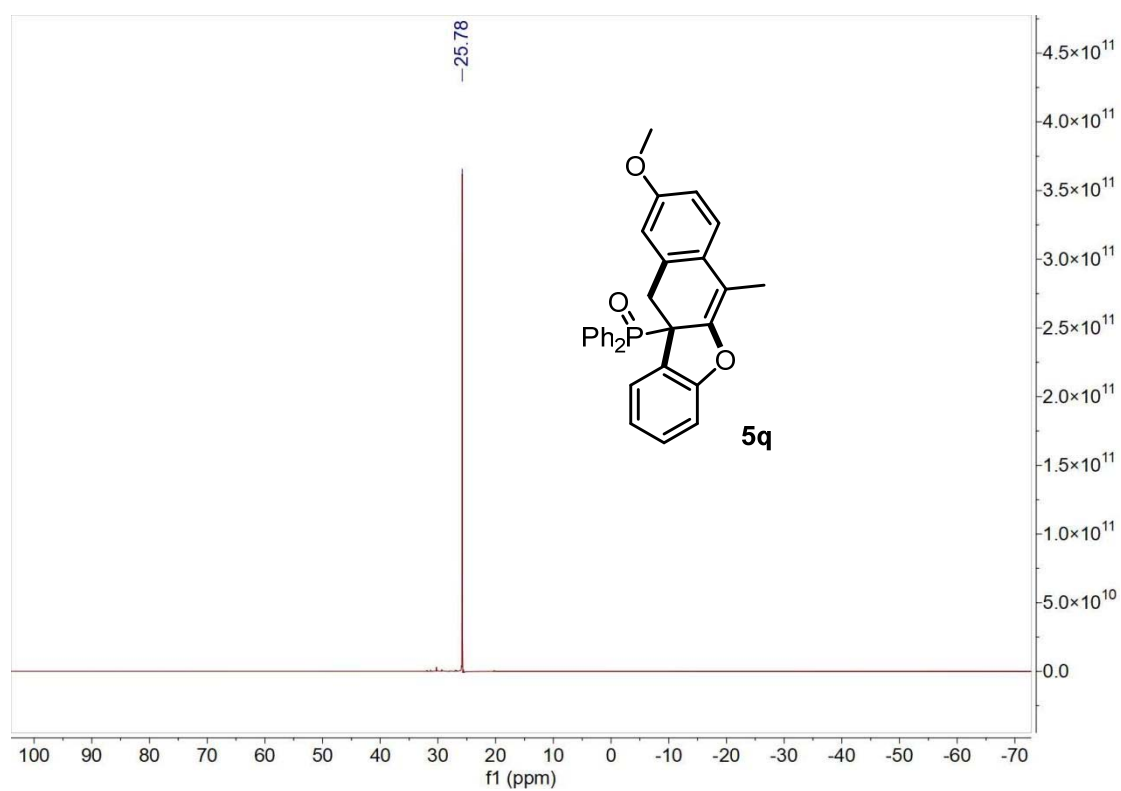

$^{31}\text{P}$ -NMR (243 MHz,  $\text{CDCl}_3$ ) of **5q**

20210118-29 #25 RT: 0.31 AV: 1 NL: 2.15E5  
T: FTMS (1,1) + p ESI Full ms [100.00-1000.00]

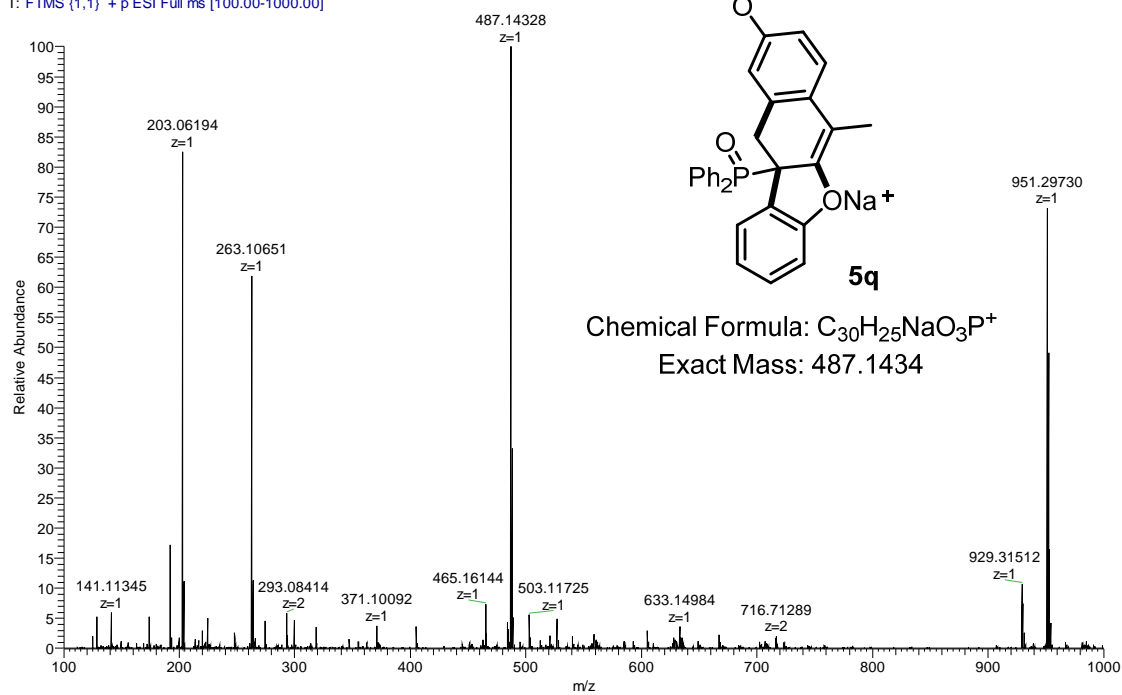

HRMS of **5q**

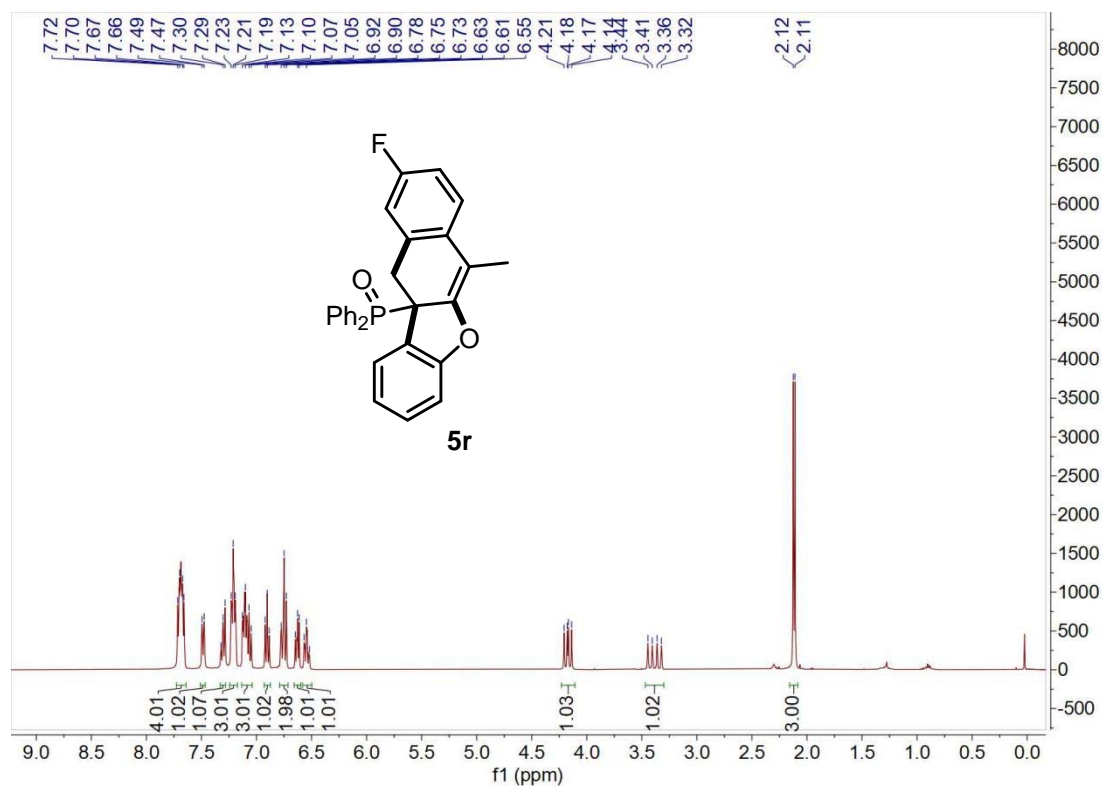

$^1H$ -NMR (400 MHz,  $CDCl_3$ ) of **5r**

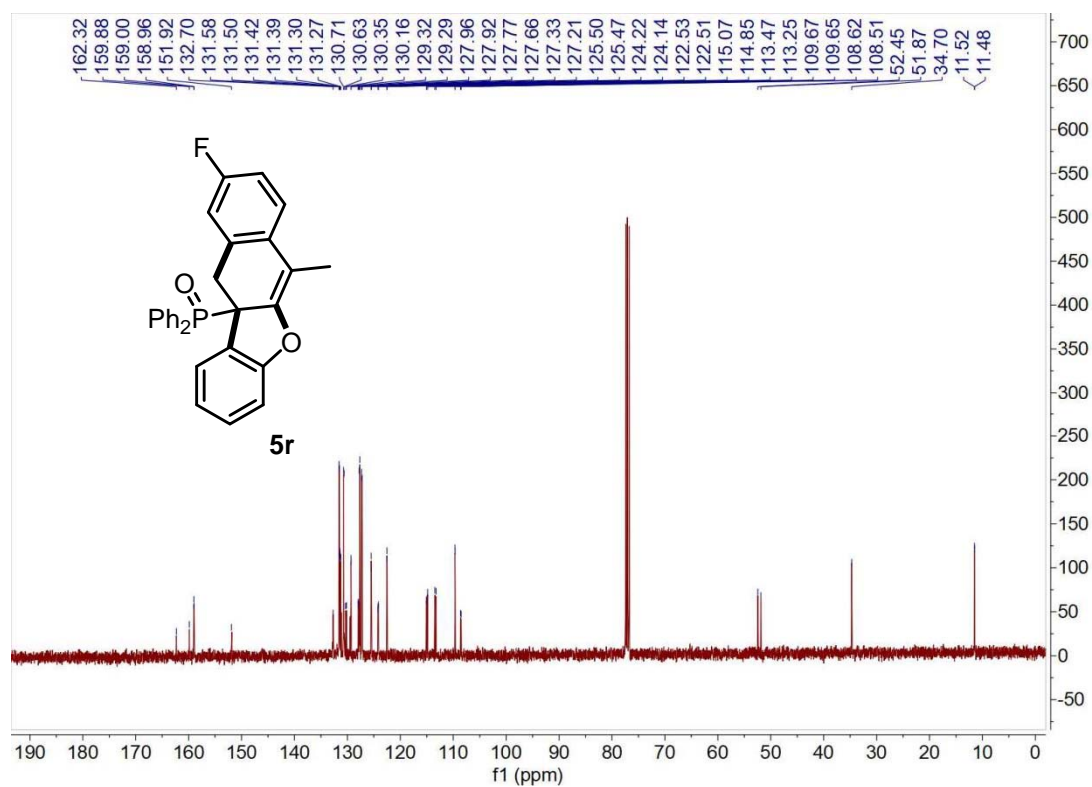

$^{13}\text{C}$ -NMR (101 MHz,  $\text{CDCl}_3$ ) of **5r**

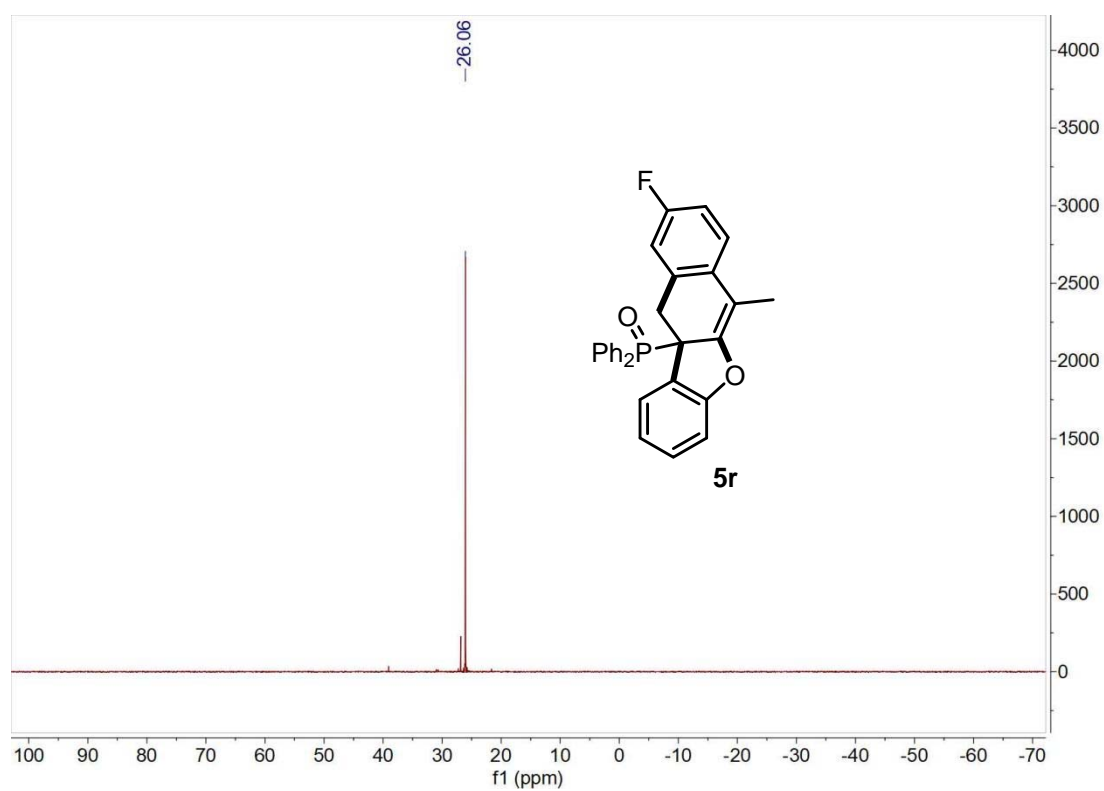

$^{31}\text{P}$ -NMR (162 MHz,  $\text{CDCl}_3$ ) of **5r**

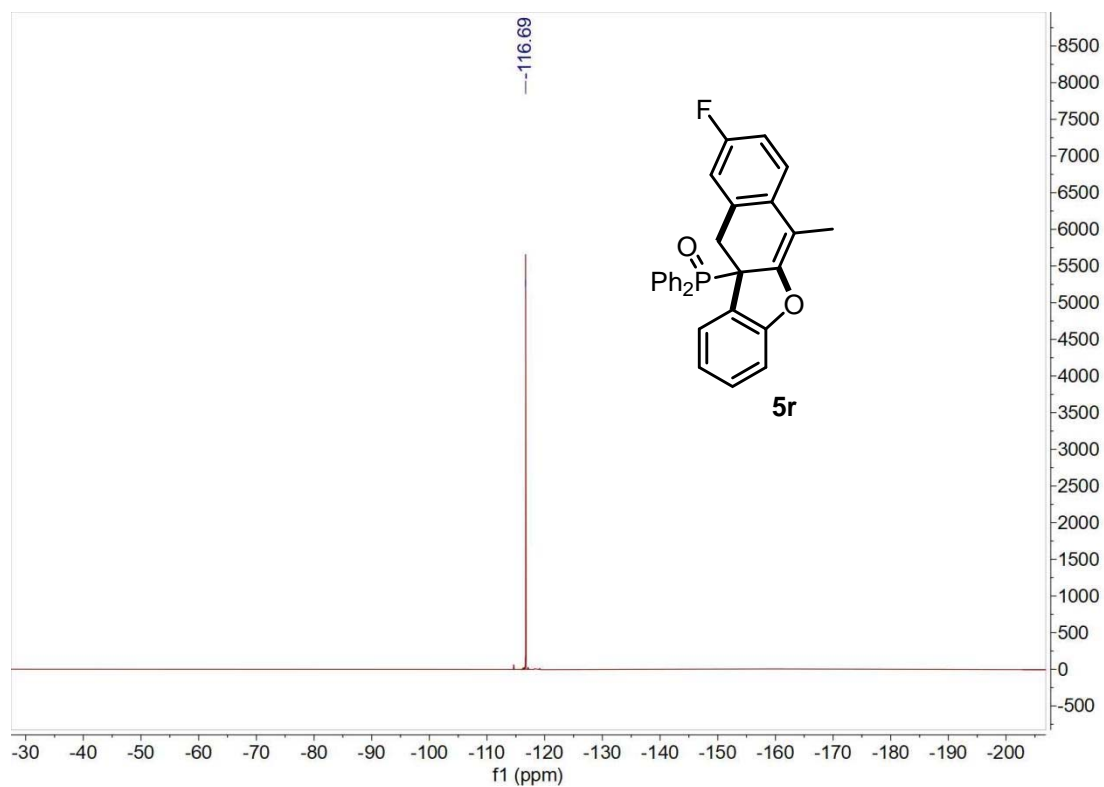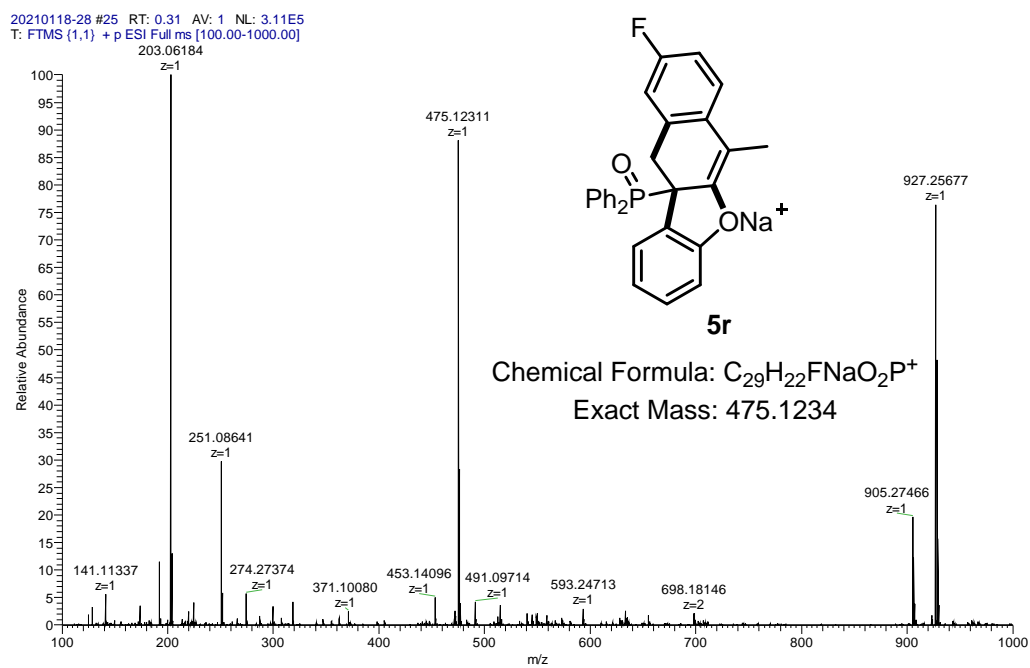

**HRMS of **5r****

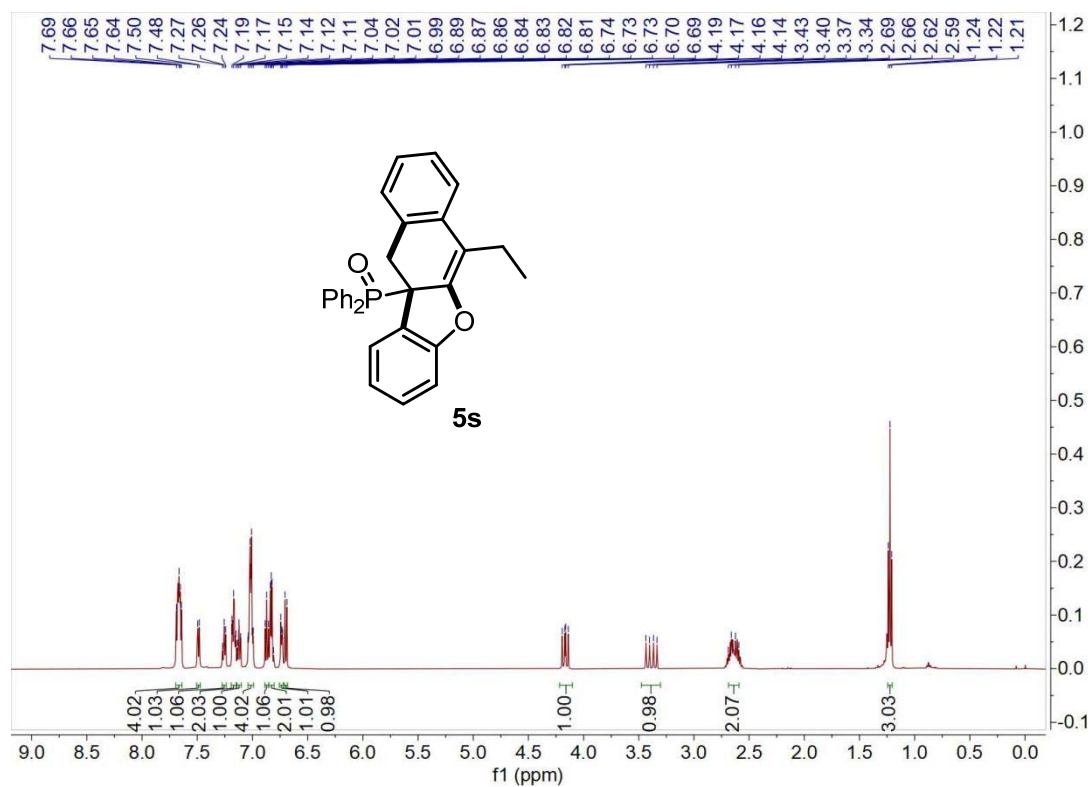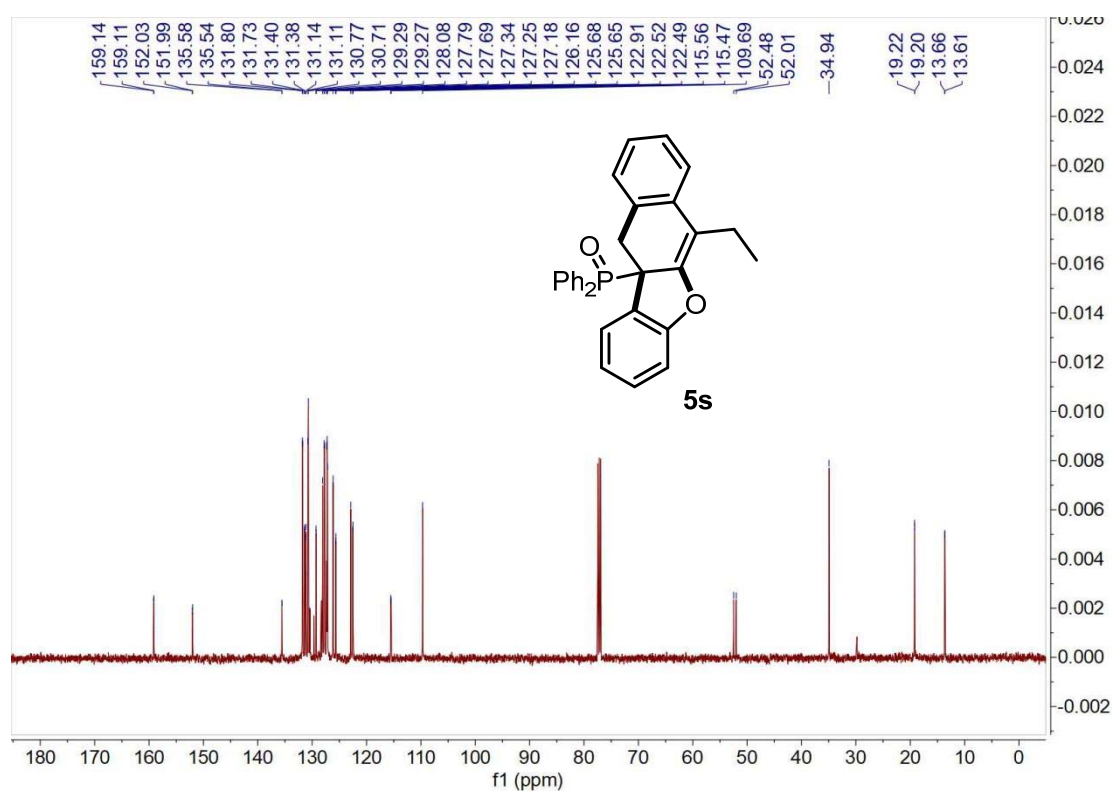

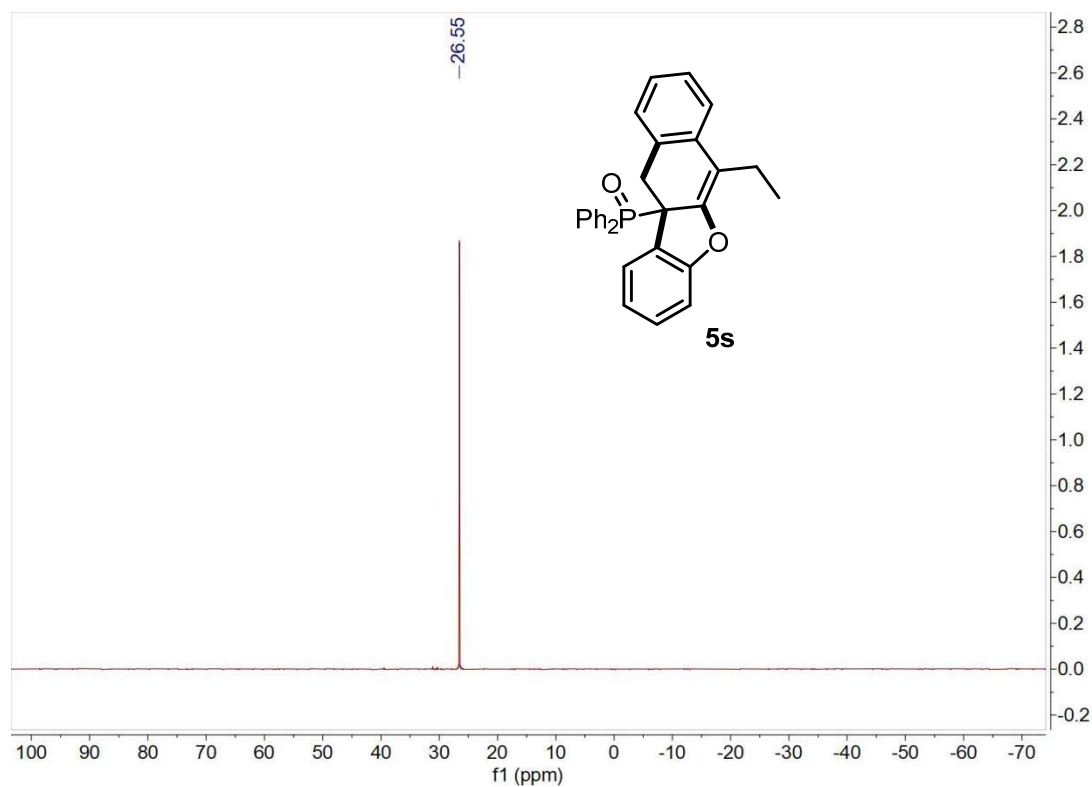

20210719-23 #35 RT: 0.41 AV: 1 NL: 9.37E5  
 T: FTMS (1,1) + p ESI Full ms [100.00-1000.00]

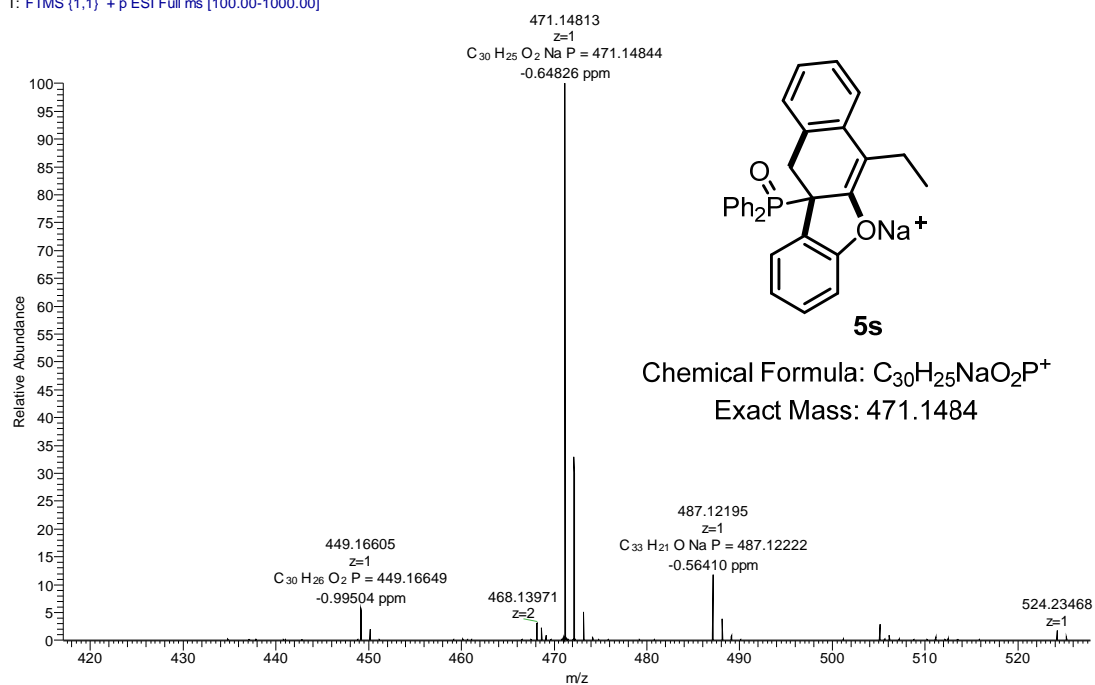

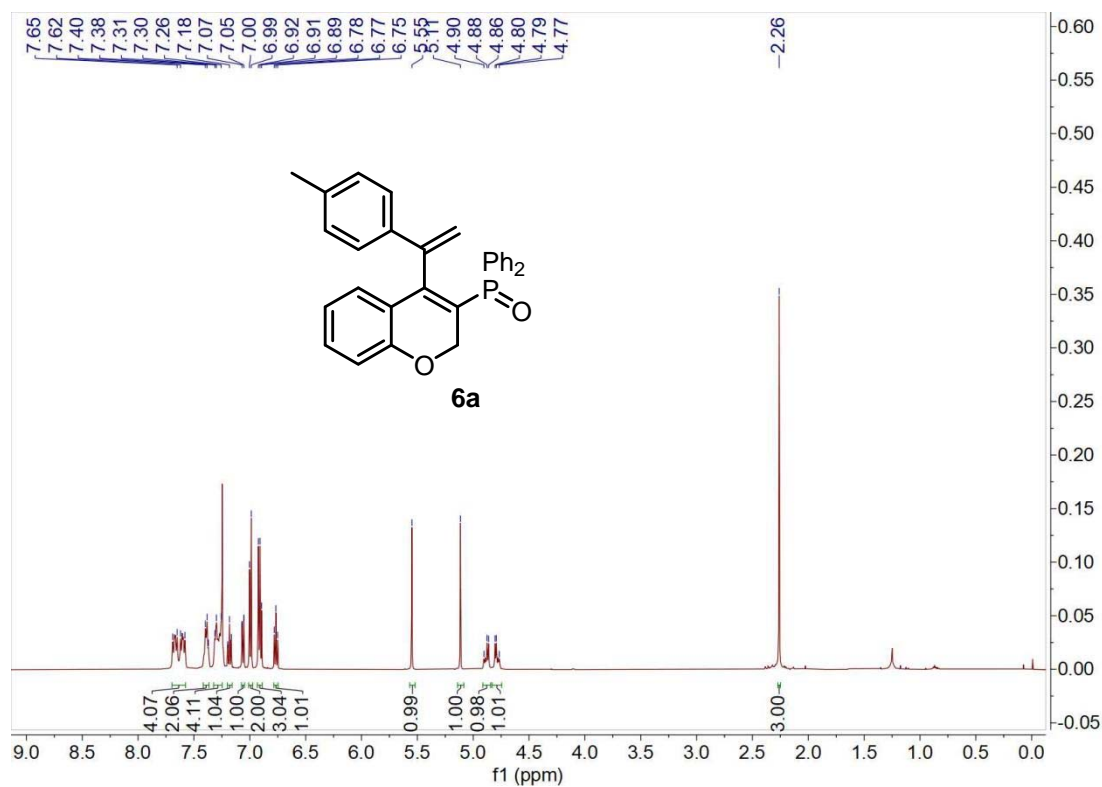

<sup>1</sup>H-NMR (500 MHz, CDCl<sub>3</sub>) of **6a**

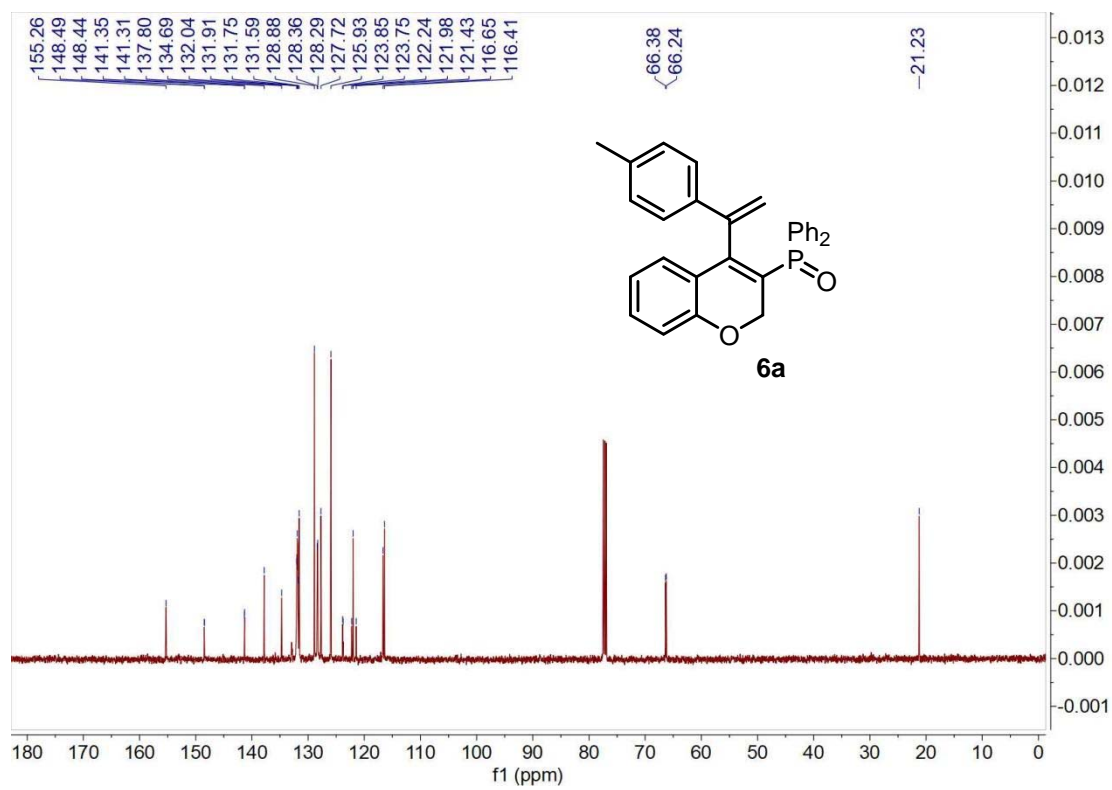

<sup>13</sup>C-NMR (126 MHz, CDCl<sub>3</sub>) of **6a**

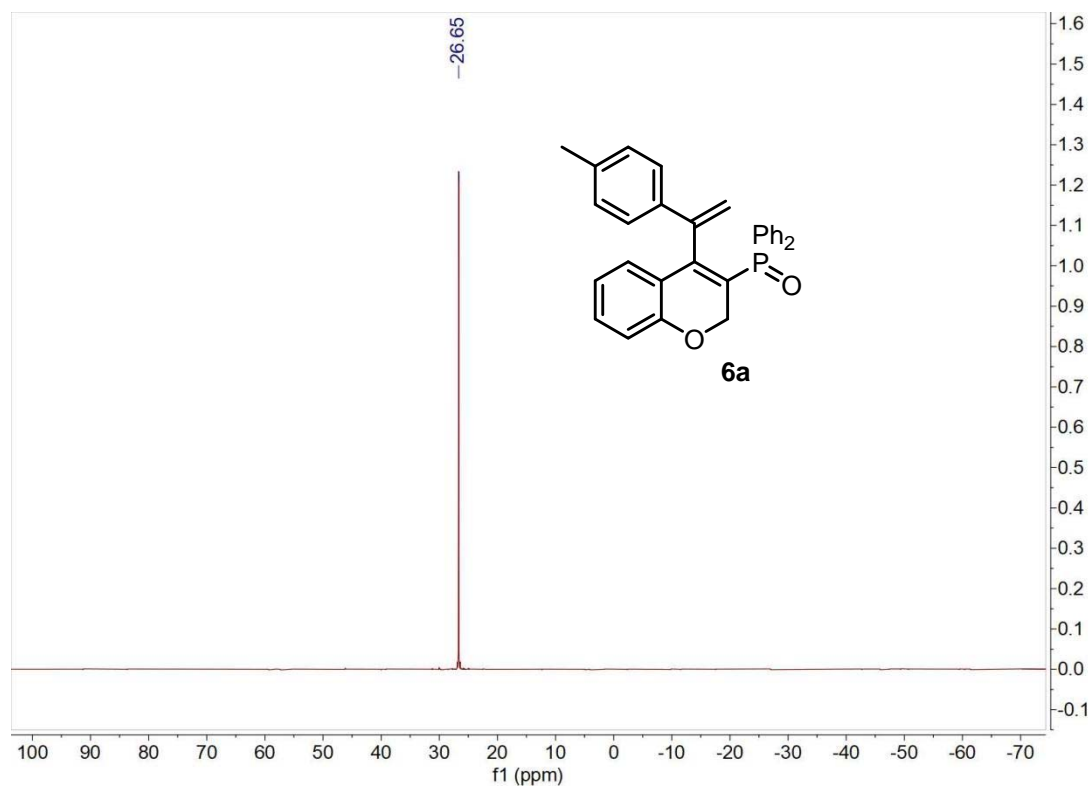

$^{31}\text{P}$ -NMR (202 MHz,  $\text{CDCl}_3$ ) of **6a**

26 #39 RT: 0.46 AV: 1 NL: 4.86E6  
T: FTMS (1,1) + p ESI Full ms [100.00-1000.00]

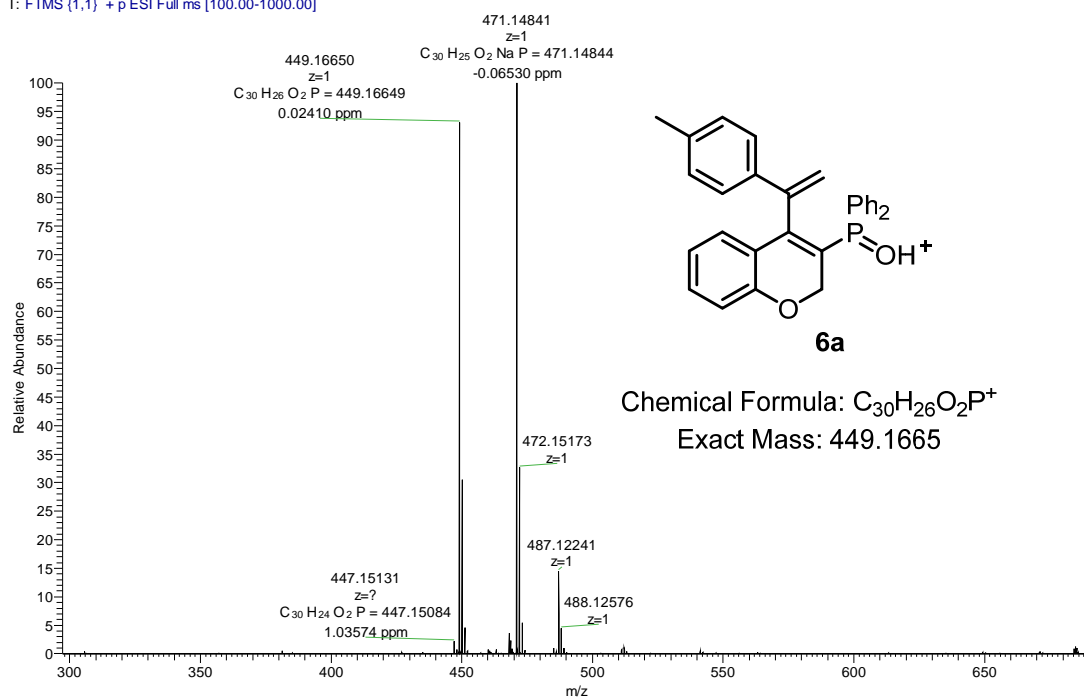

HRMS of **6a**



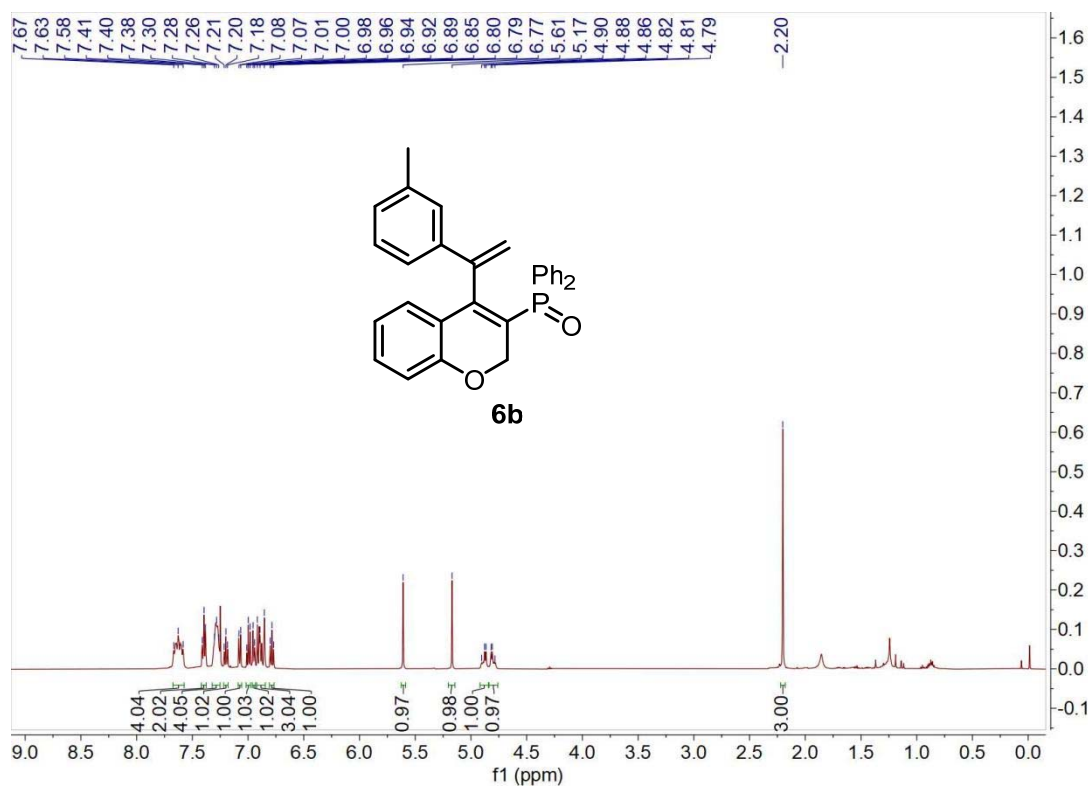

<sup>1</sup>H-NMR (500 MHz, CDCl<sub>3</sub>) of **6b**

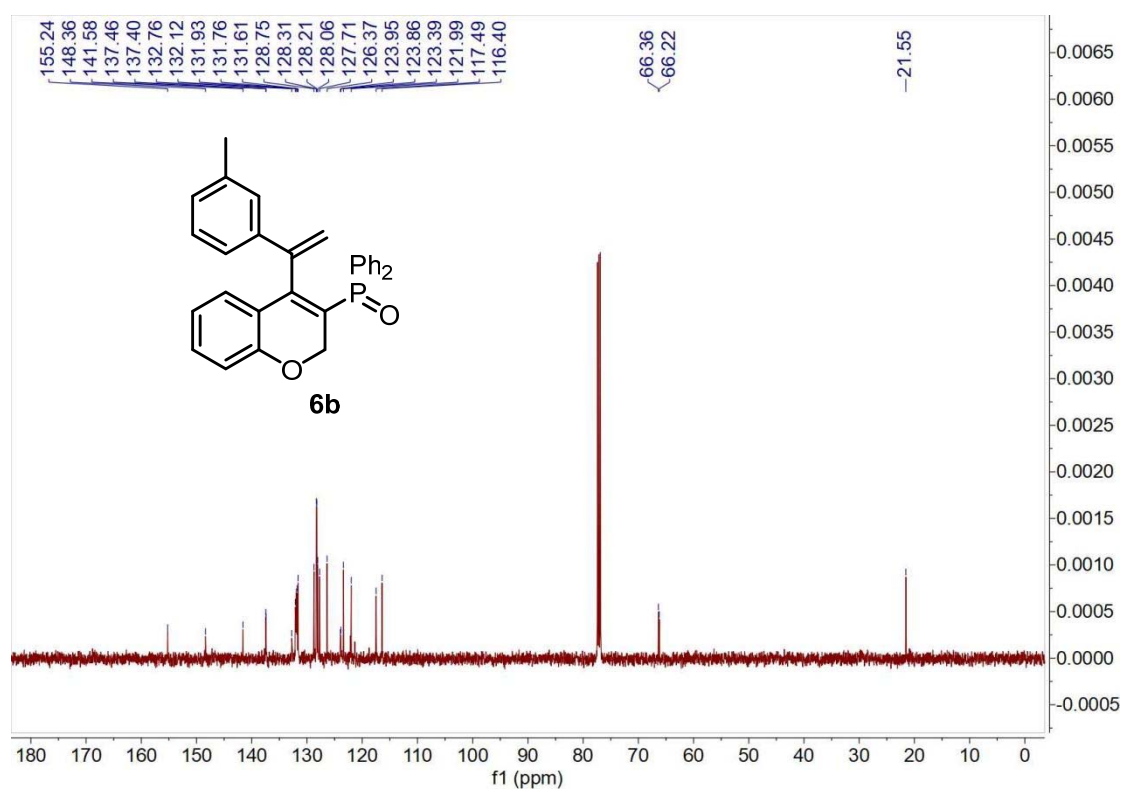

<sup>13</sup>C-NMR (126 MHz, CDCl<sub>3</sub>) of **6b**

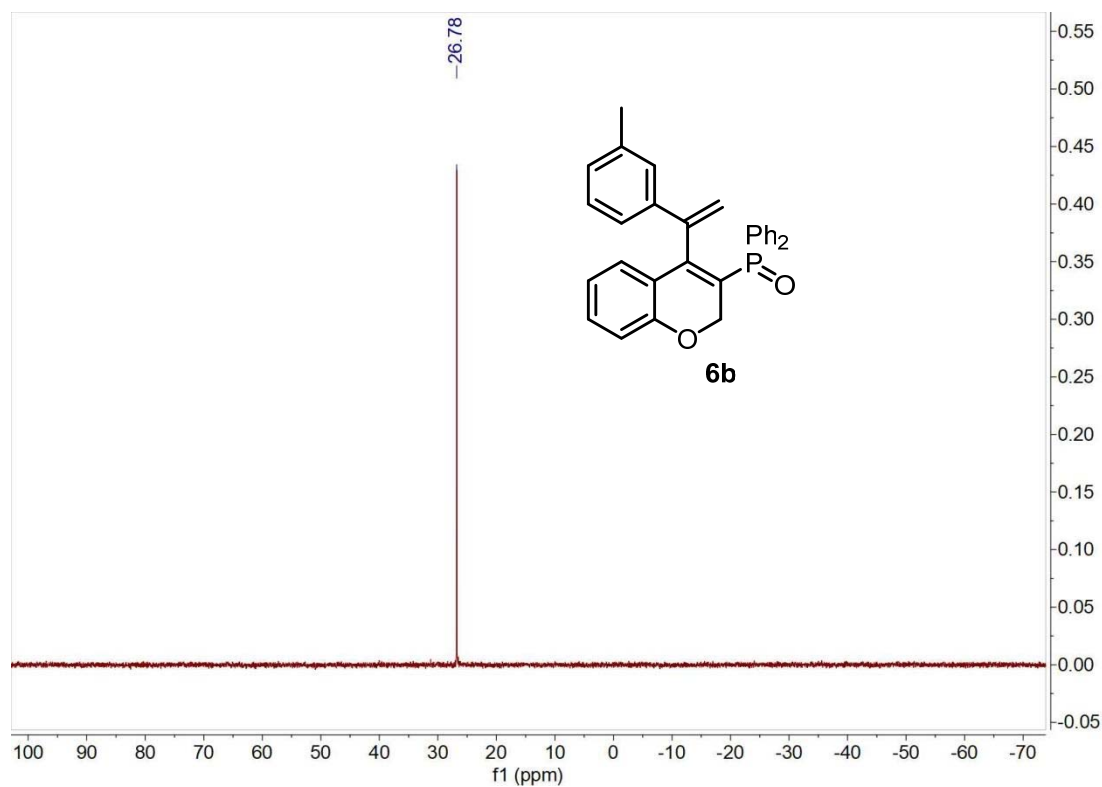

$^{31}\text{P}$ -NMR (202 MHz,  $\text{CDCl}_3$ ) of **6b**

Spectrum from 07.wiff (sample 1) - Sample013, Experiment 1, +TOF MS (80 - 1000) from 0.792 to 0.837 min

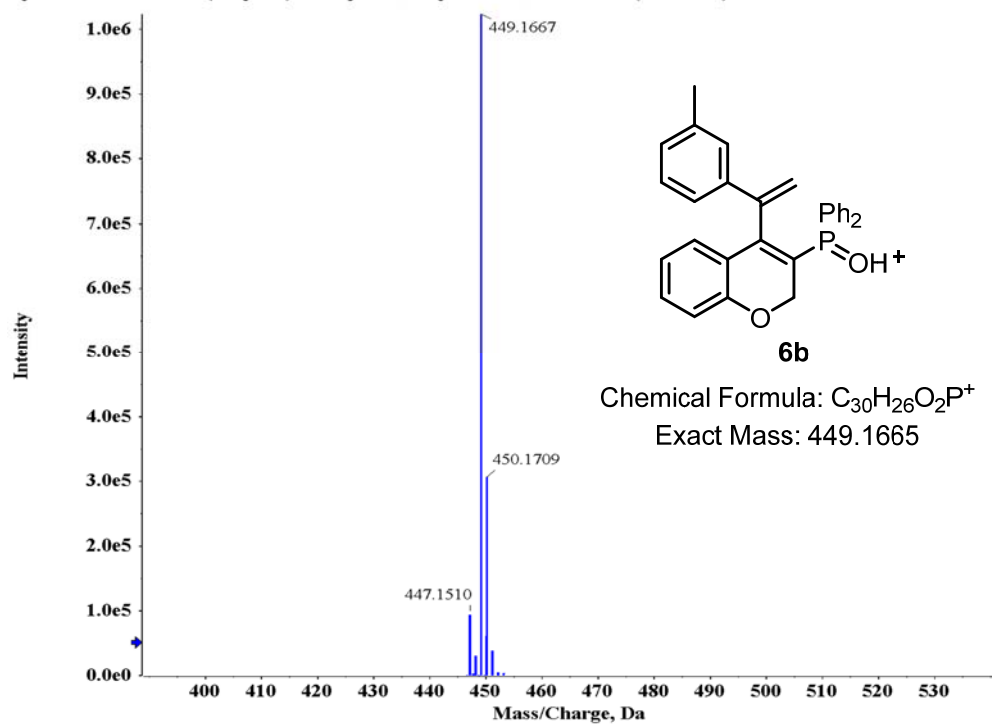

HRMS of **6b**

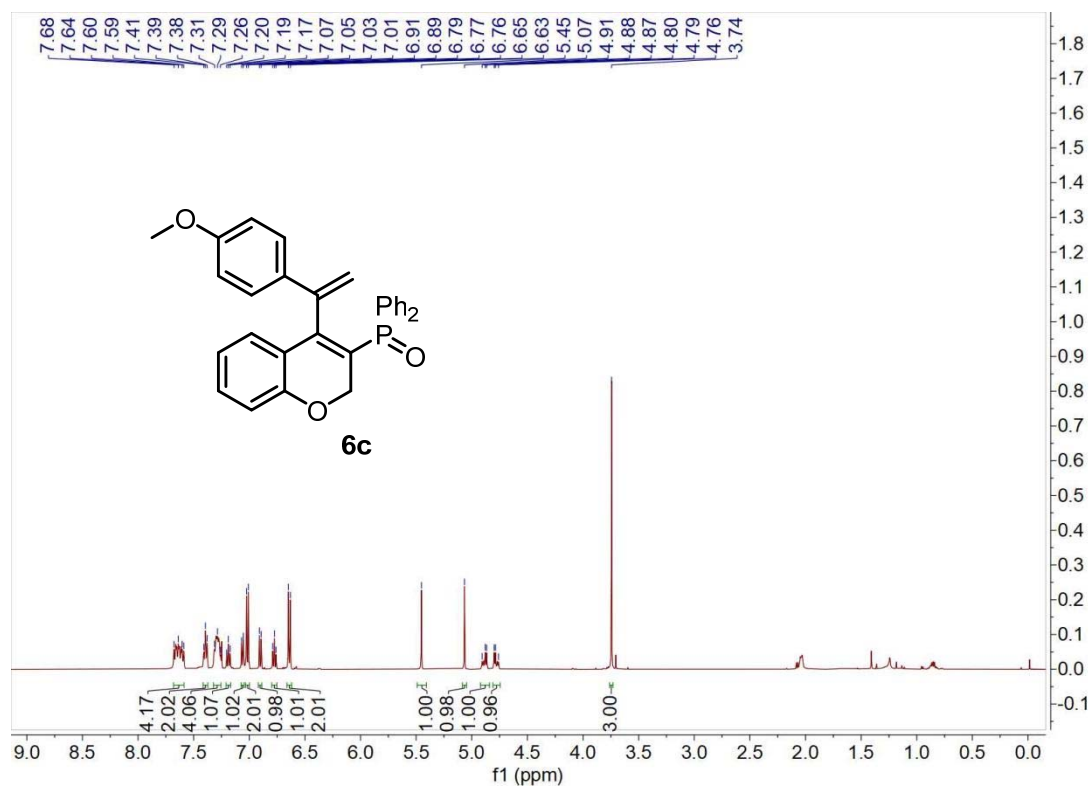

<sup>1</sup>H-NMR (500 MHz, CDCl<sub>3</sub>) of **6c**

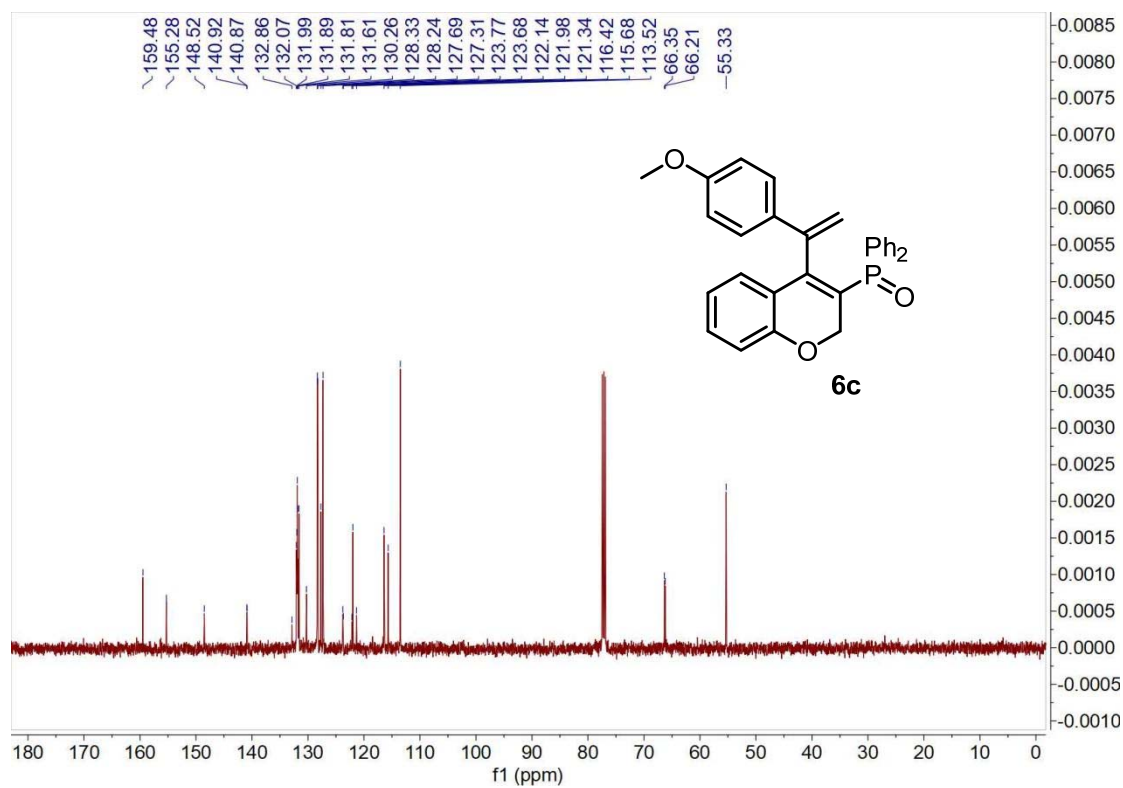

<sup>13</sup>C-NMR (126 MHz, CDCl<sub>3</sub>) of **6c**

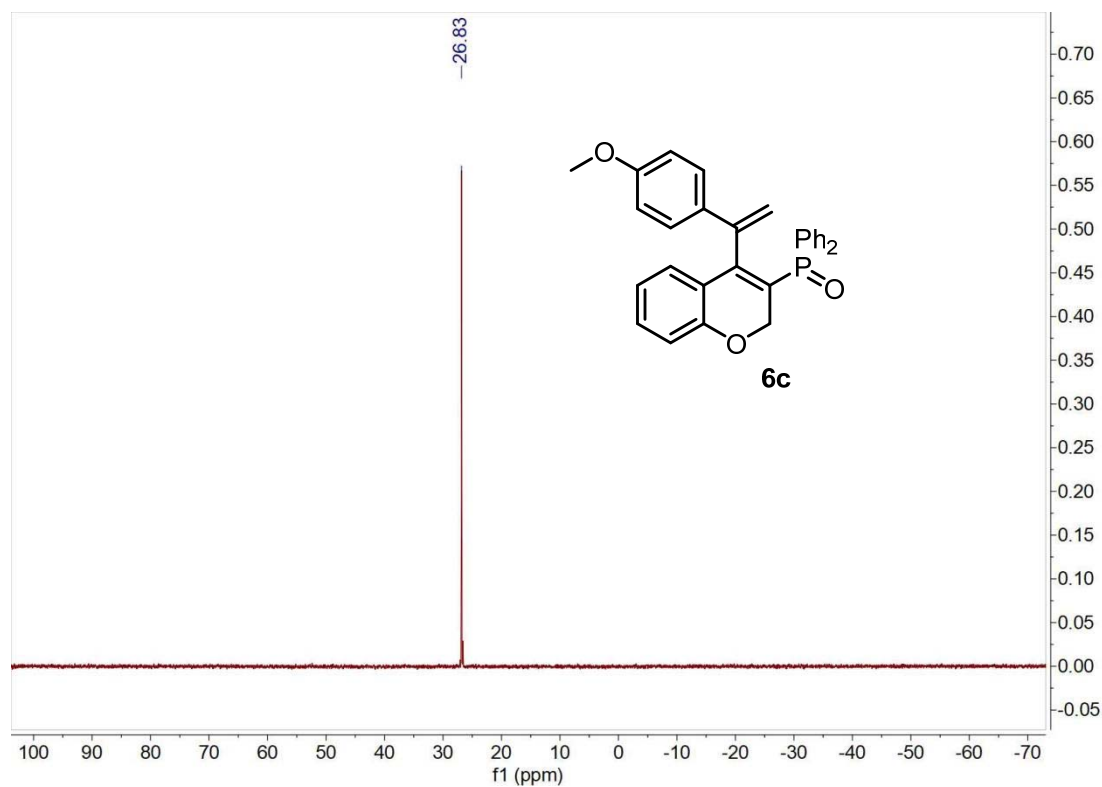

$^{31}\text{P}$ -NMR (202 MHz,  $\text{CDCl}_3$ ) of **6c**

27 #27 RT: 0.33 AV: 1 NL: 1.68E6  
T: FTMS (1,1) + p ESI Full ms [100.00-1000.00]

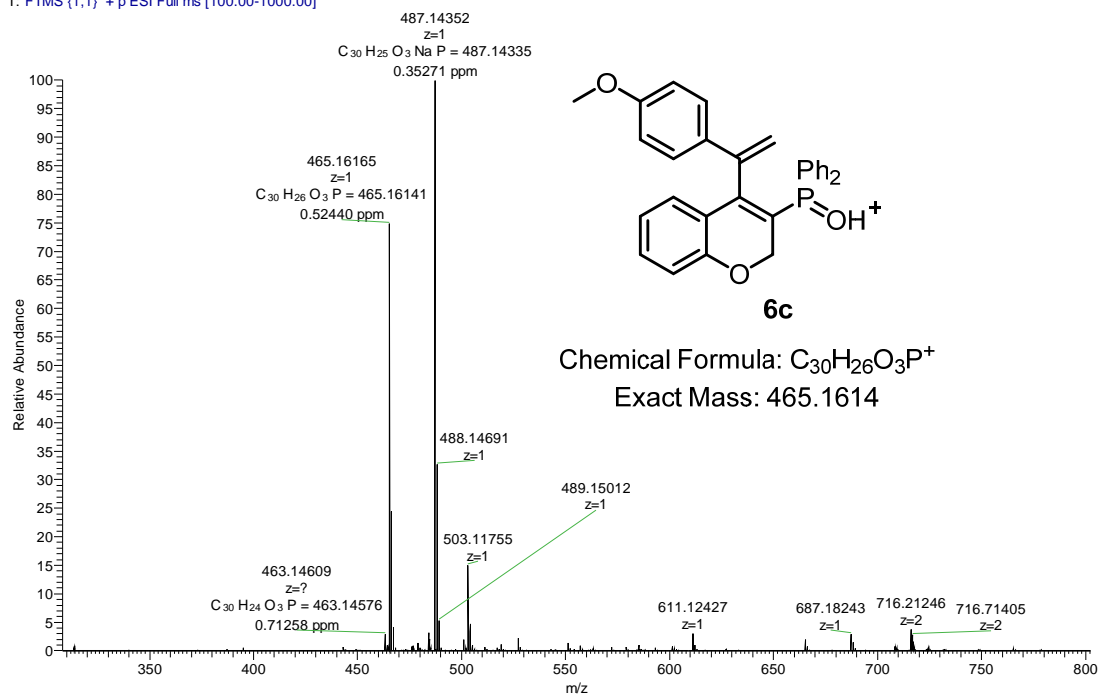

HRMS of **6c**

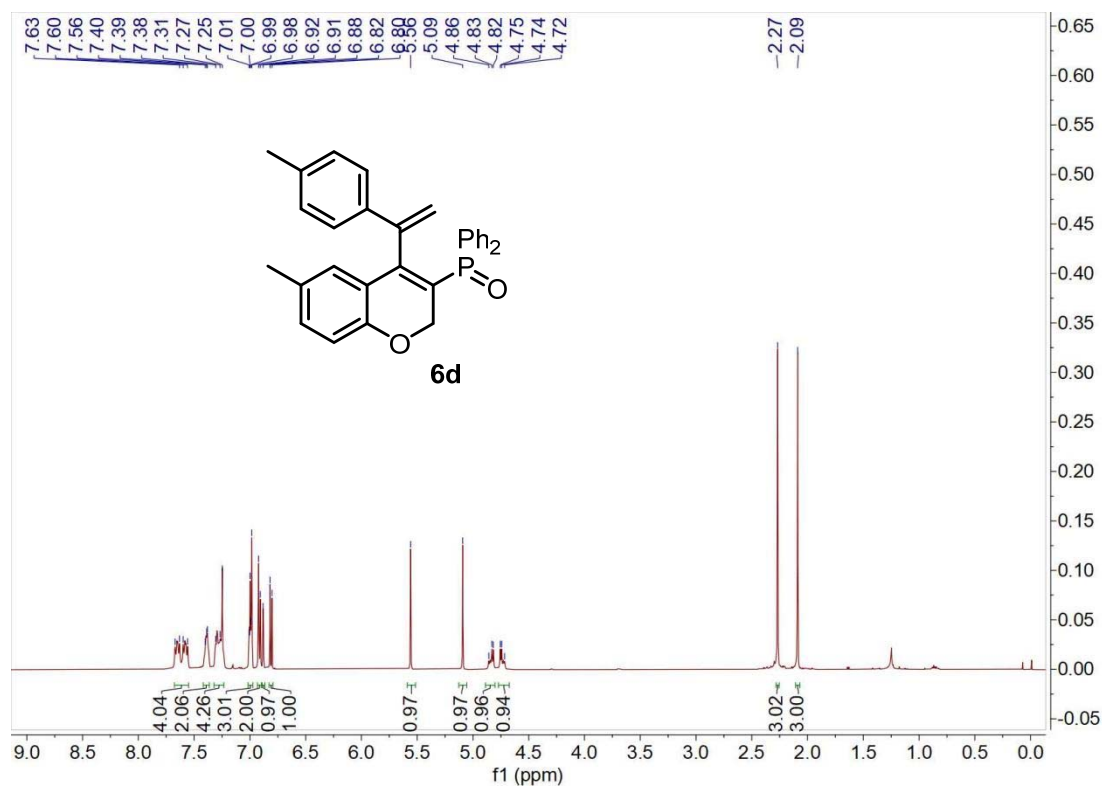

$^1\text{H-NMR}$  (500 MHz,  $\text{CDCl}_3$ ) of **6d**

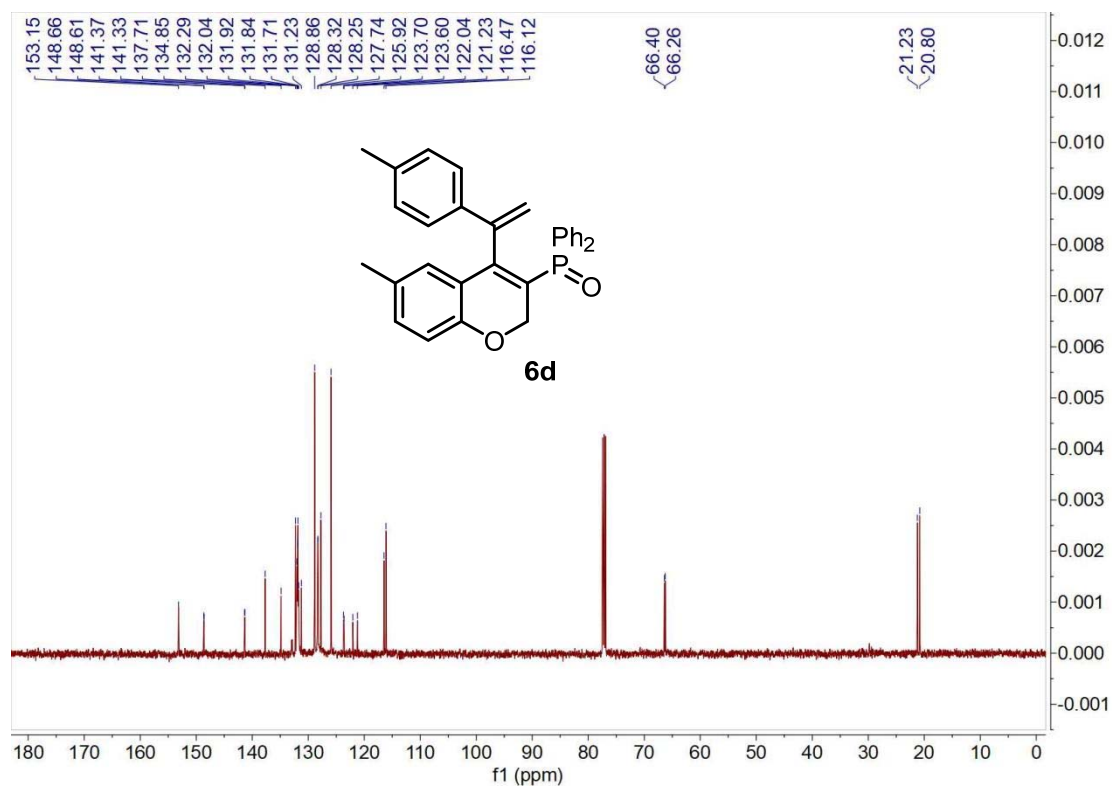

$^{13}\text{C-NMR}$  (126 MHz,  $\text{CDCl}_3$ ) of **6d**

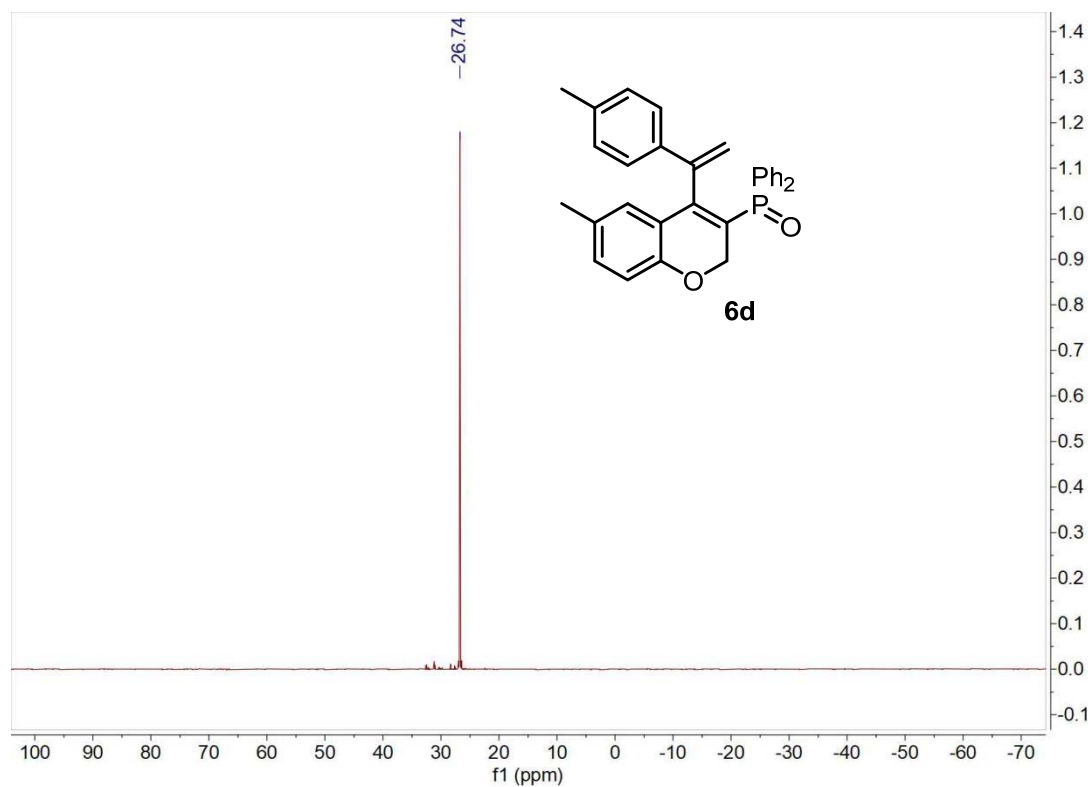

$^{31}\text{P}$ -NMR (202 MHz,  $\text{CDCl}_3$ ) of **6d**

28 #27 RT: 0.32 AV: 1 NL: 1.58E6  
T: FTMS (1,1) + p ESI Full ms [100.00-1000.00]

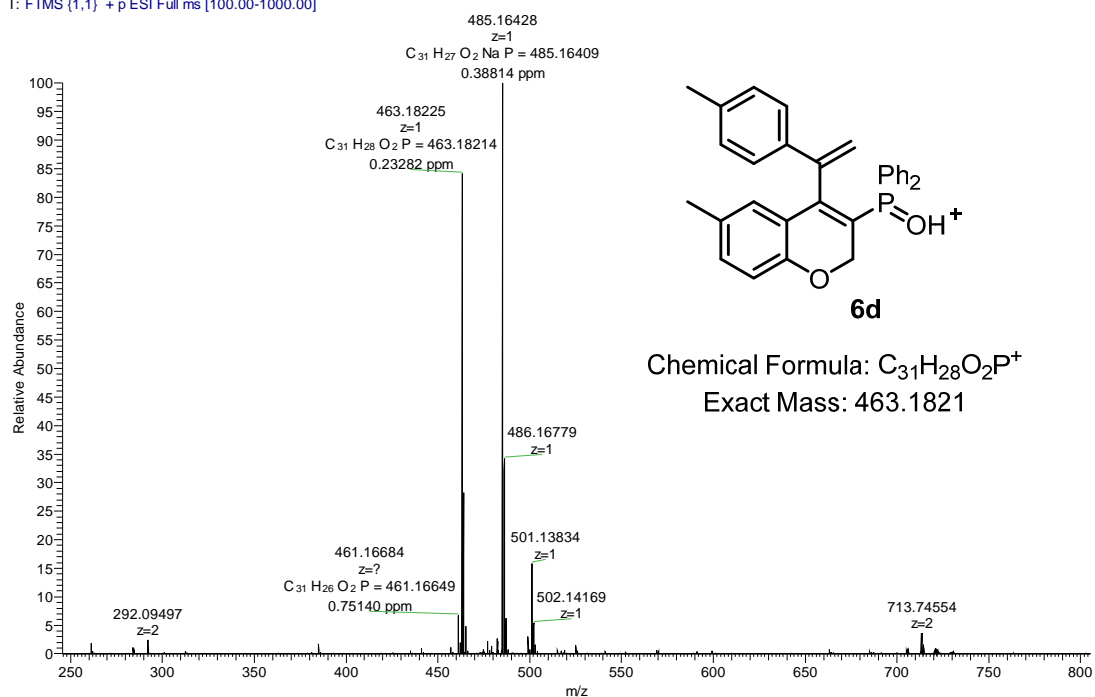

HRMS of **6d**

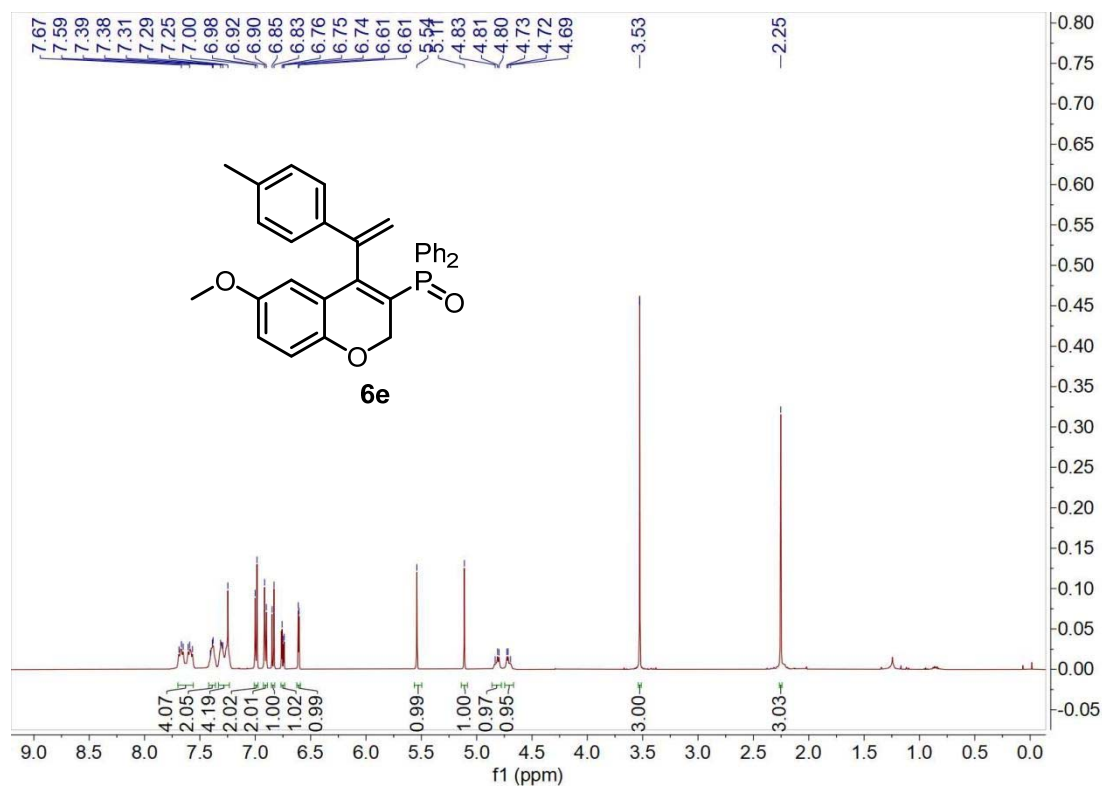

$^1\text{H-NMR}$  (500 MHz,  $\text{CDCl}_3$ ) of **6e**

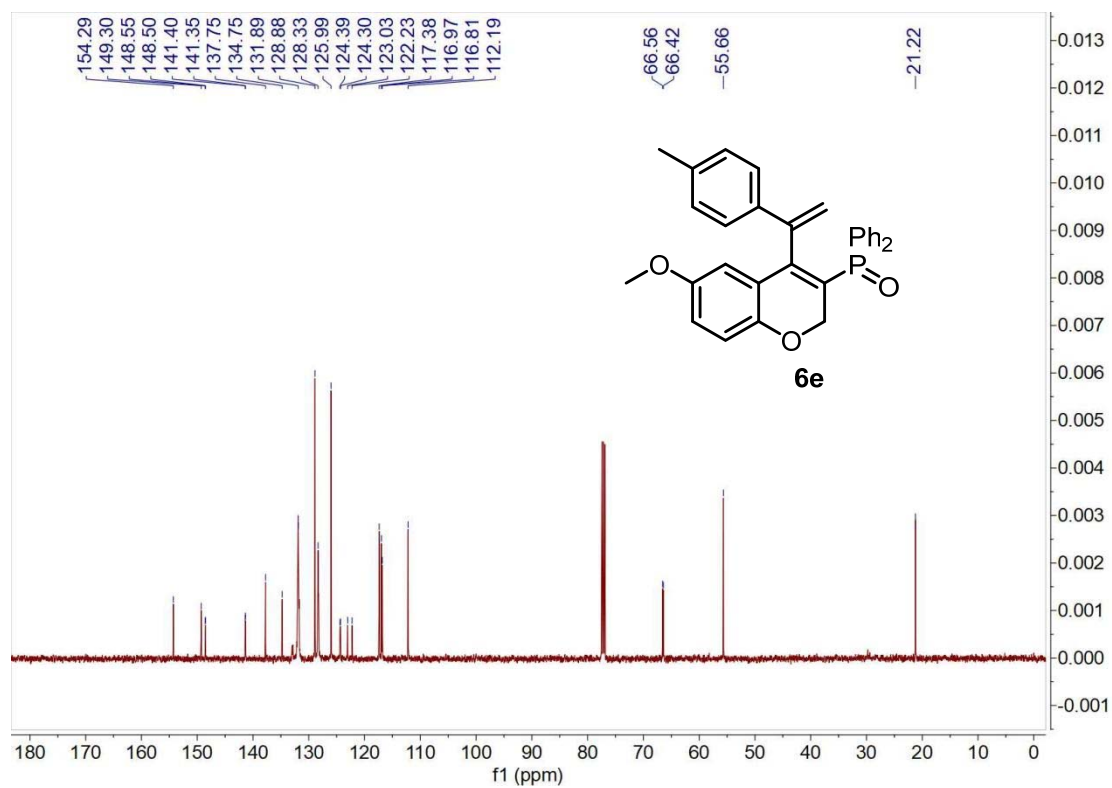

$^{13}\text{C-NMR}$  (126 MHz,  $\text{CDCl}_3$ ) of **6e**

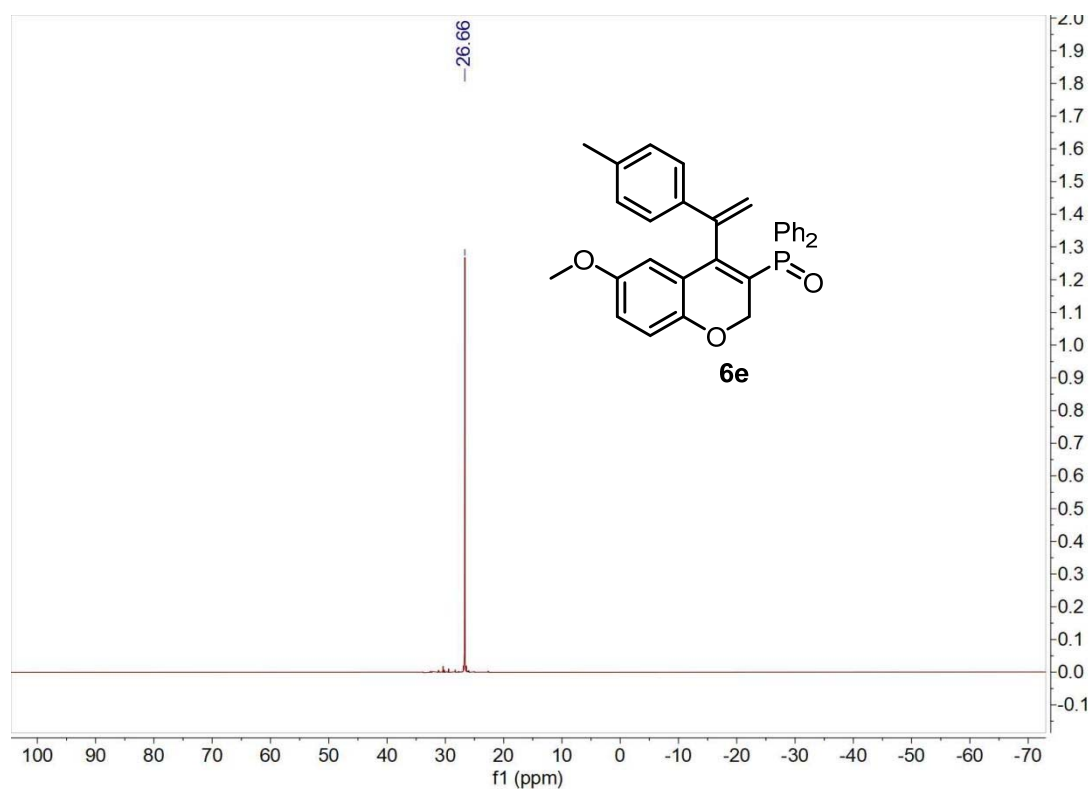

$^{31}\text{P}$ -NMR (202 MHz,  $\text{CDCl}_3$ ) of **6e**

29 #9 RT: 0.11 AV: 1 NL: 1.71E6  
T: FTMS (1,1) + p ESI Full ms [100.00-1000.00]

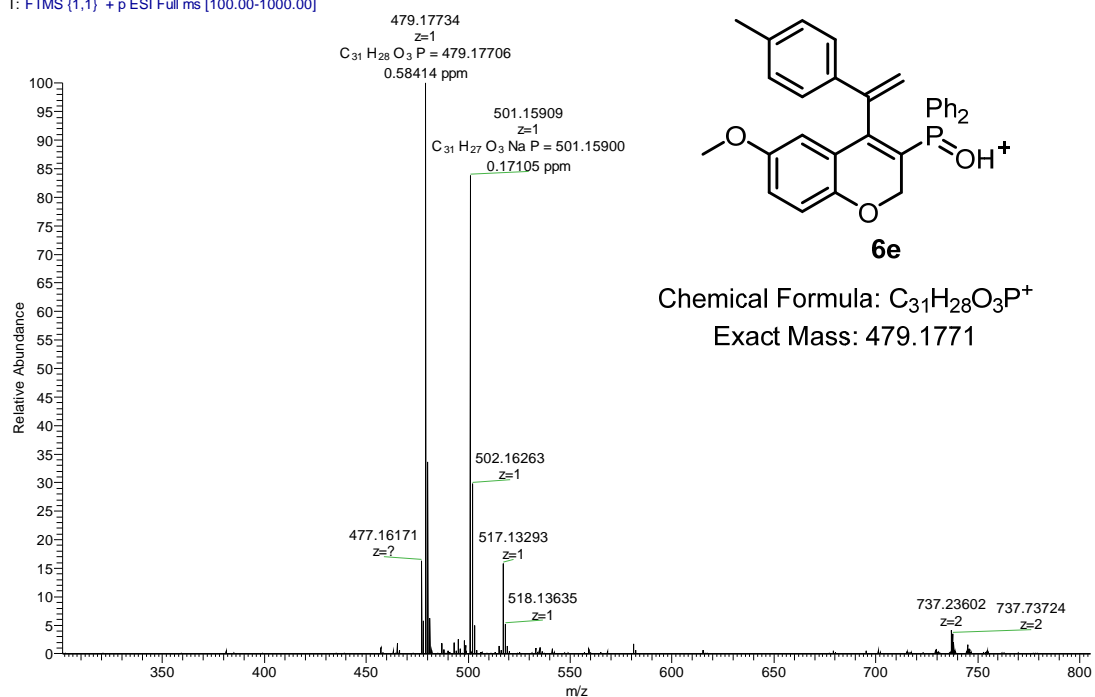

HRMS of **6e**



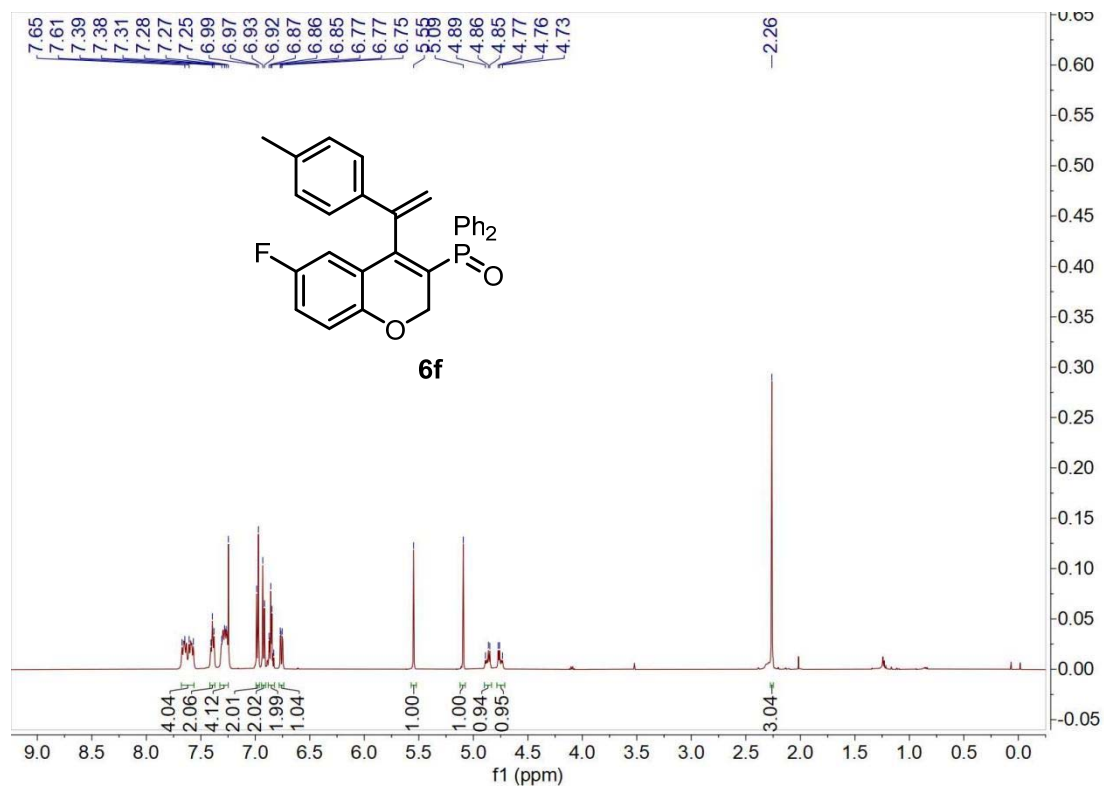

$^1\text{H-NMR}$  (500 MHz,  $\text{CDCl}_3$ ) of **6f**

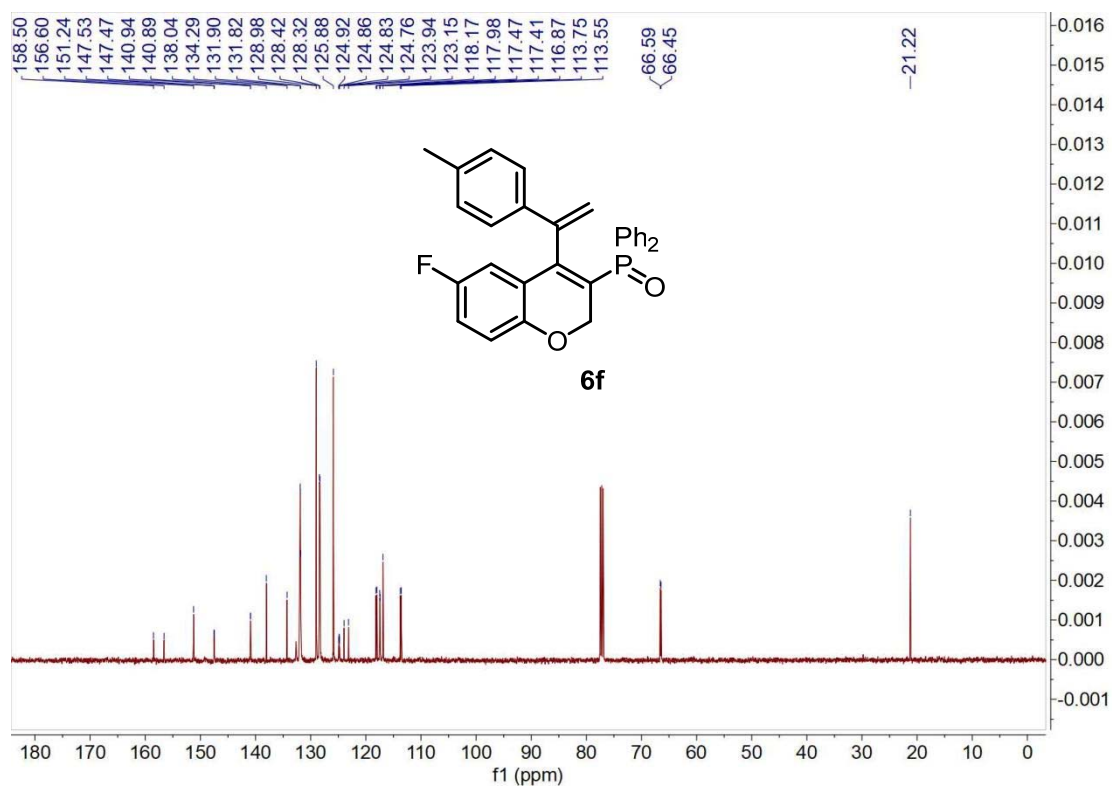

$^{13}\text{C-NMR}$  (126 MHz,  $\text{CDCl}_3$ ) of **6f**

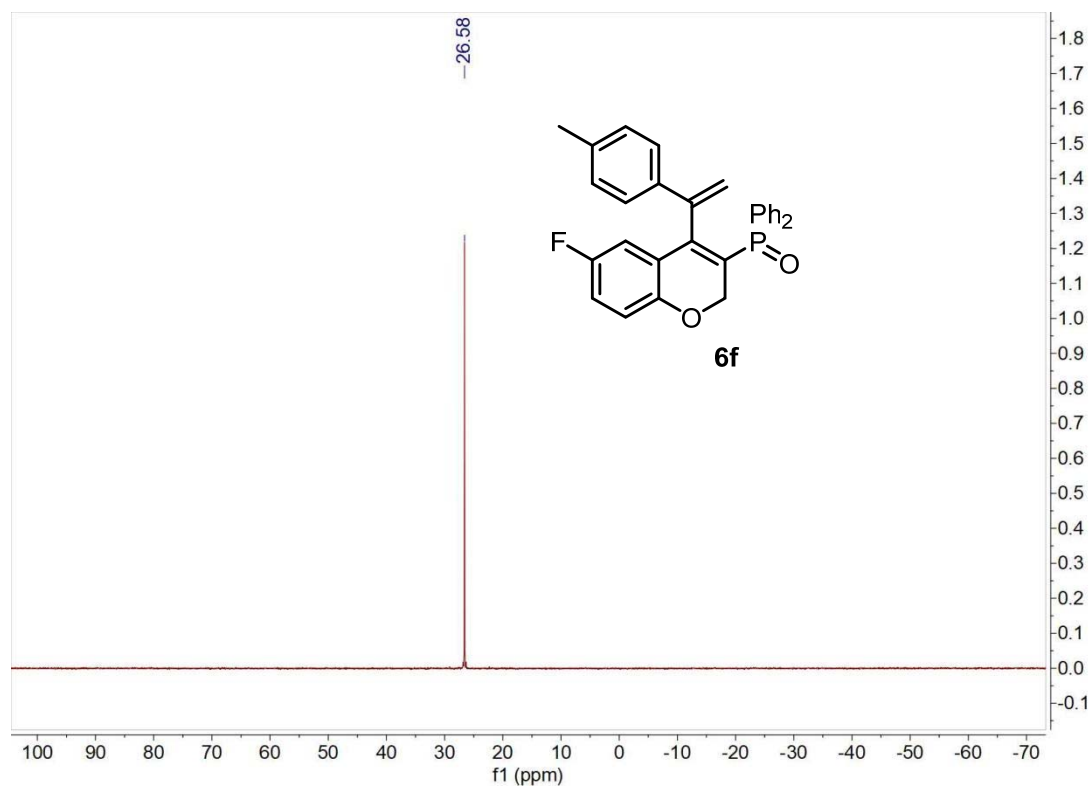

$^{31}\text{P}$ -NMR (202 MHz,  $\text{CDCl}_3$ ) of **6f**

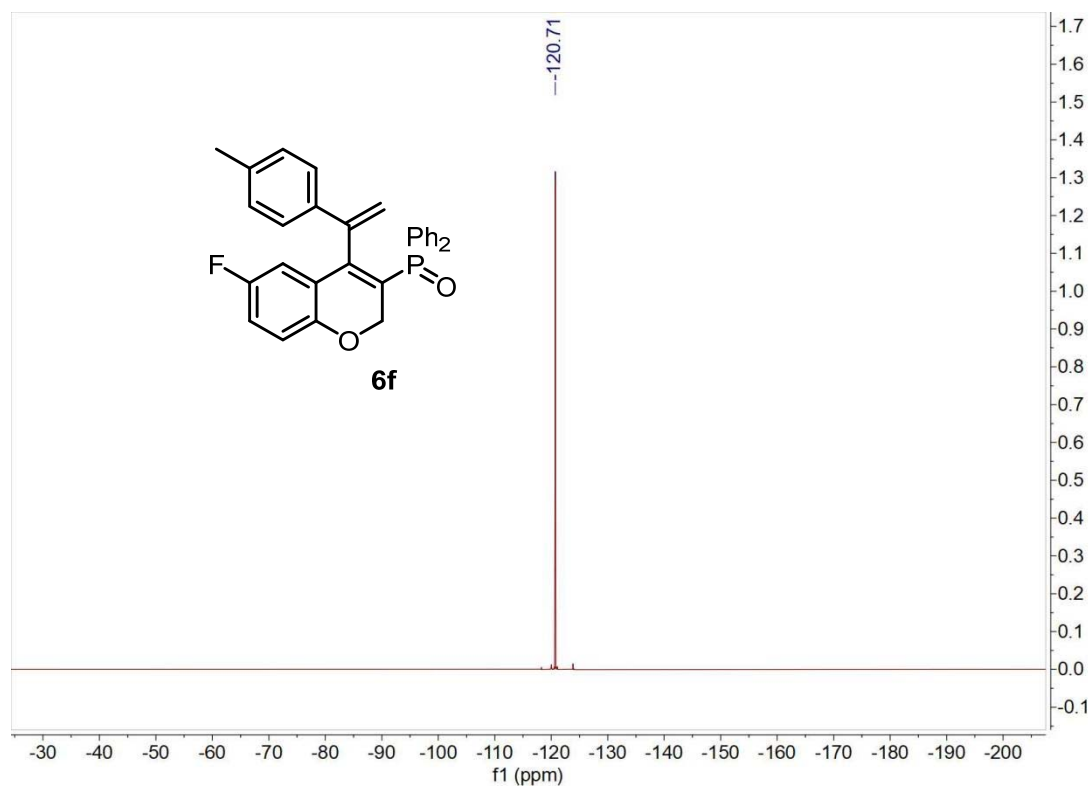

$^{19}\text{F}$ -NMR (471 MHz,  $\text{CDCl}_3$ ) of **6f**

30 #9 RT: 0.12 AV: 1 NL: 1.67E6  
T: FTMS (1,1) + p ESI Full ms [100.00-1000.00]

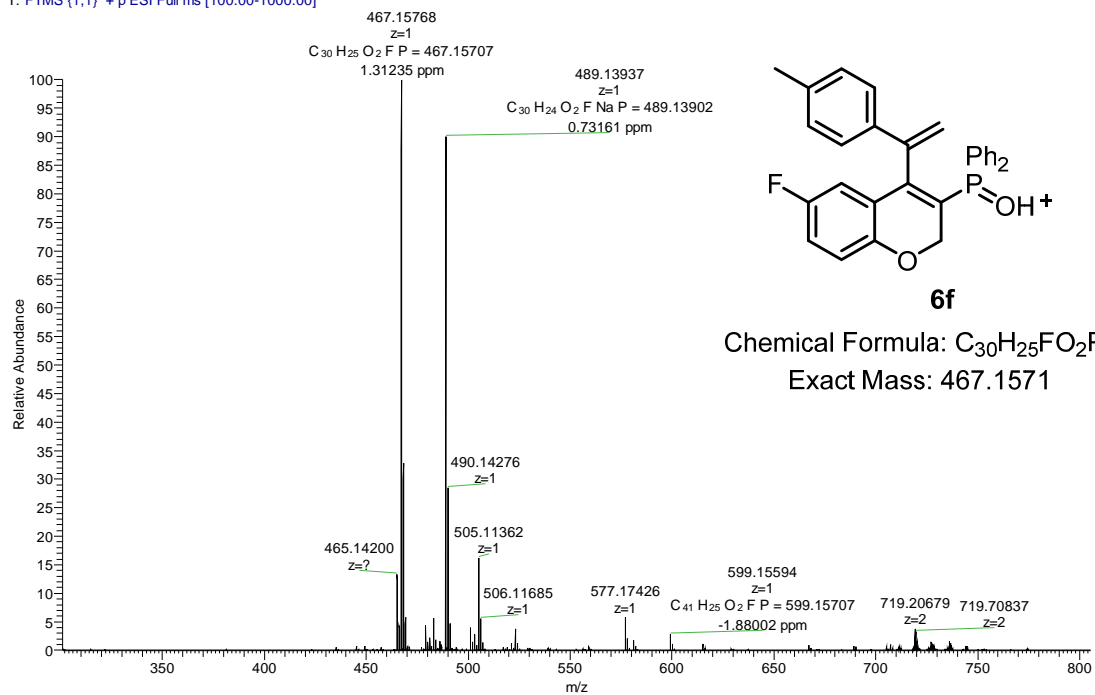

HRMS of **6f**

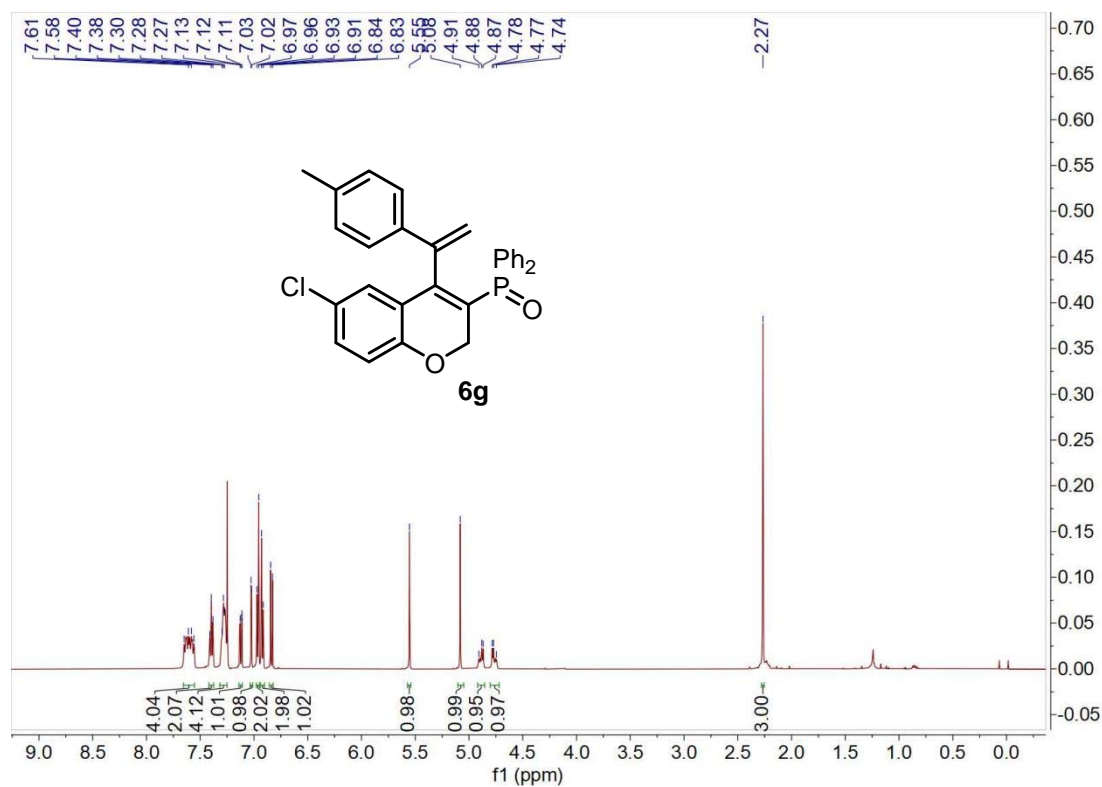

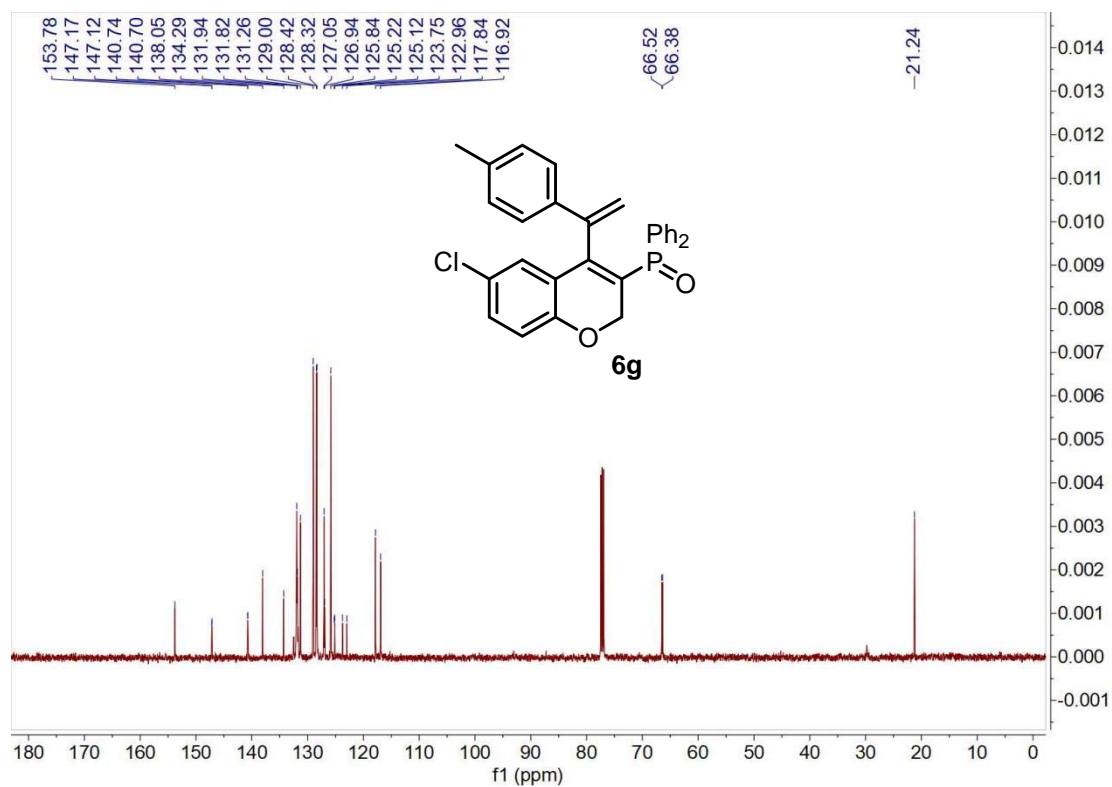

<sup>13</sup>C-NMR (126 MHz, CDCl<sub>3</sub>) of **6g**

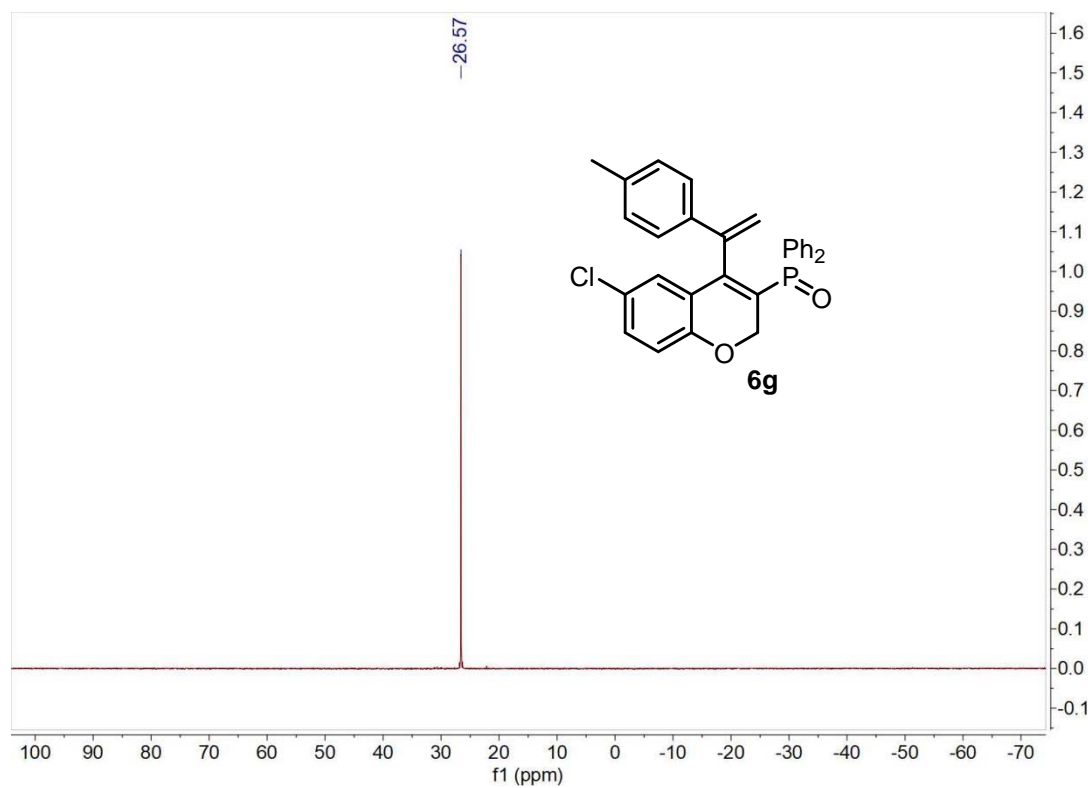

<sup>31</sup>P-NMR (202 MHz, CDCl<sub>3</sub>) of **6g**

31 #33 RT: 0.40 AV: 1 NL: 9.46E5  
T: FTMS (1,1) +p ESI Full ms [100.00-1000.00]

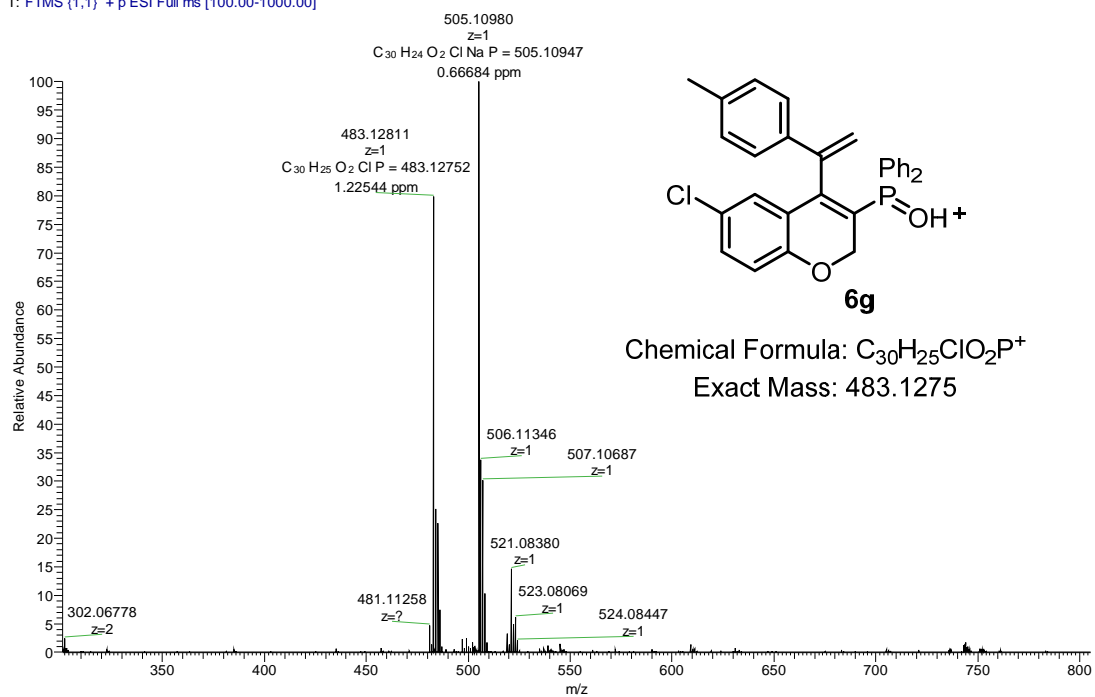

HRMS of **6g**

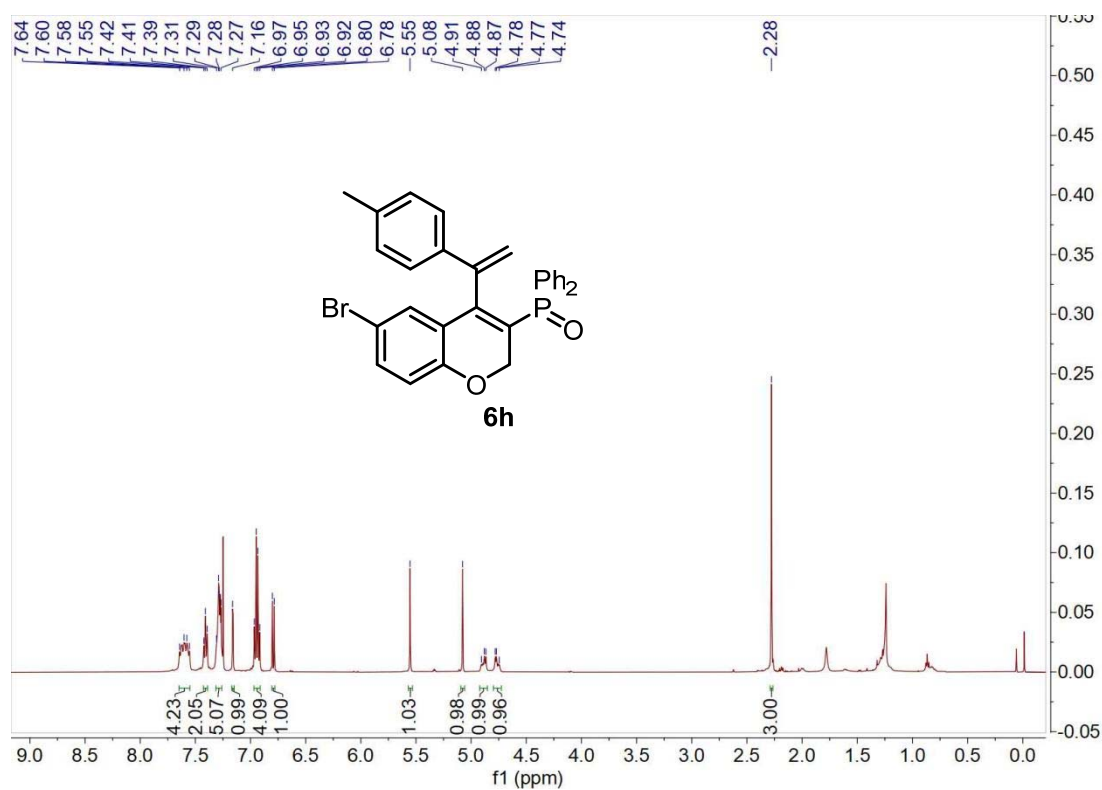

<sup>1</sup>H-NMR (500 MHz, CDCl<sub>3</sub>) of **6h**

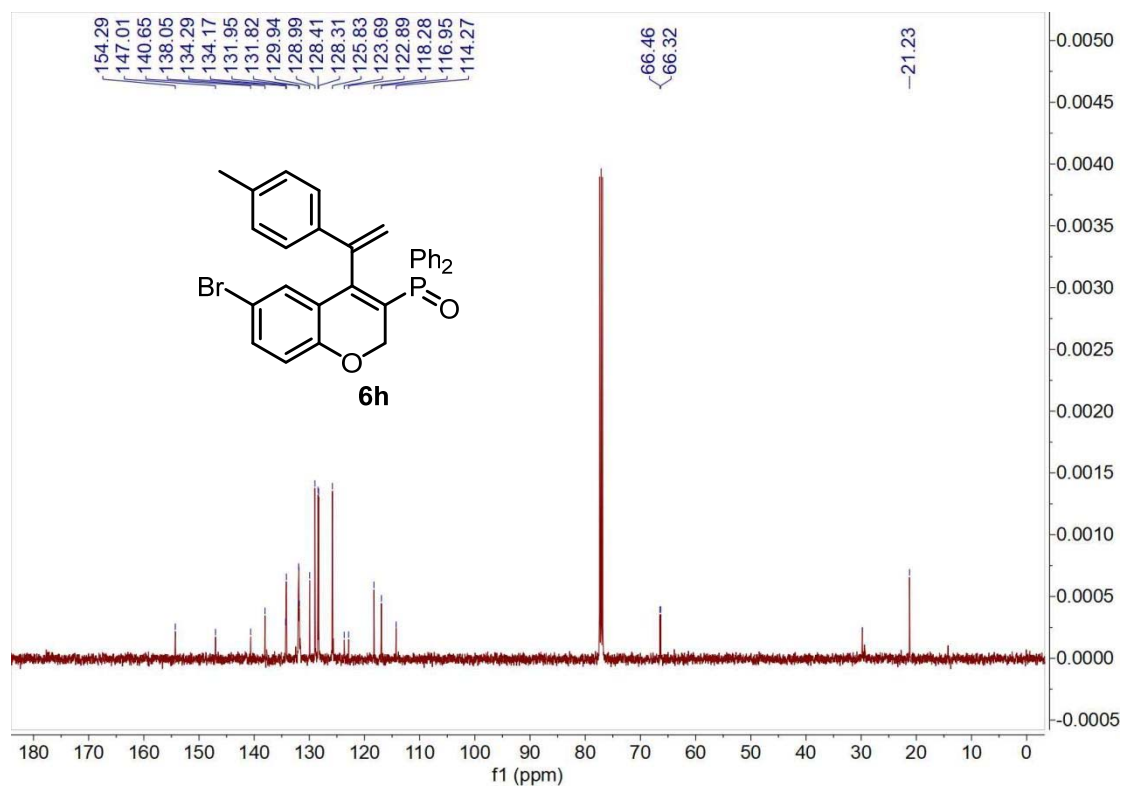

<sup>13</sup>C-NMR (126 MHz, CDCl<sub>3</sub>) of **6h**

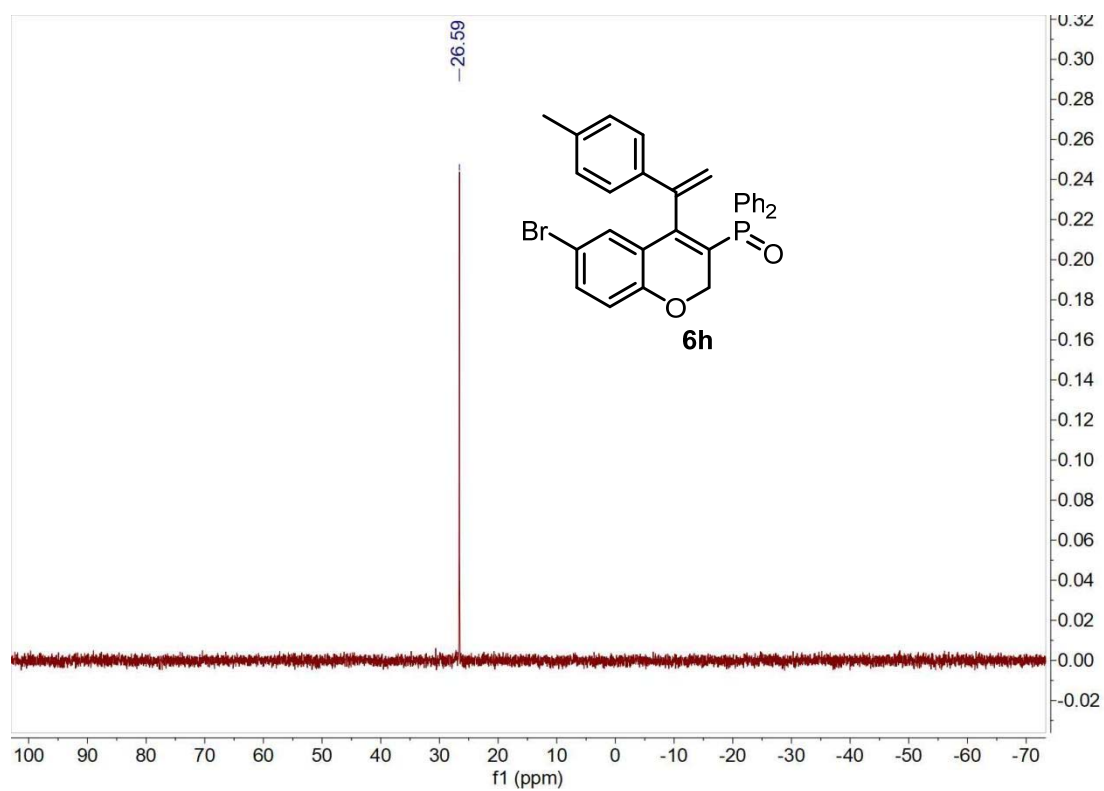

<sup>31</sup>P-NMR (202 MHz, CDCl<sub>3</sub>) of **6h**

32 #27 RT: 0.33 AV: 1 NL: 6.18E5  
 T: FTMS (1,1) +p ESI Full ms [100.00-1000.00]

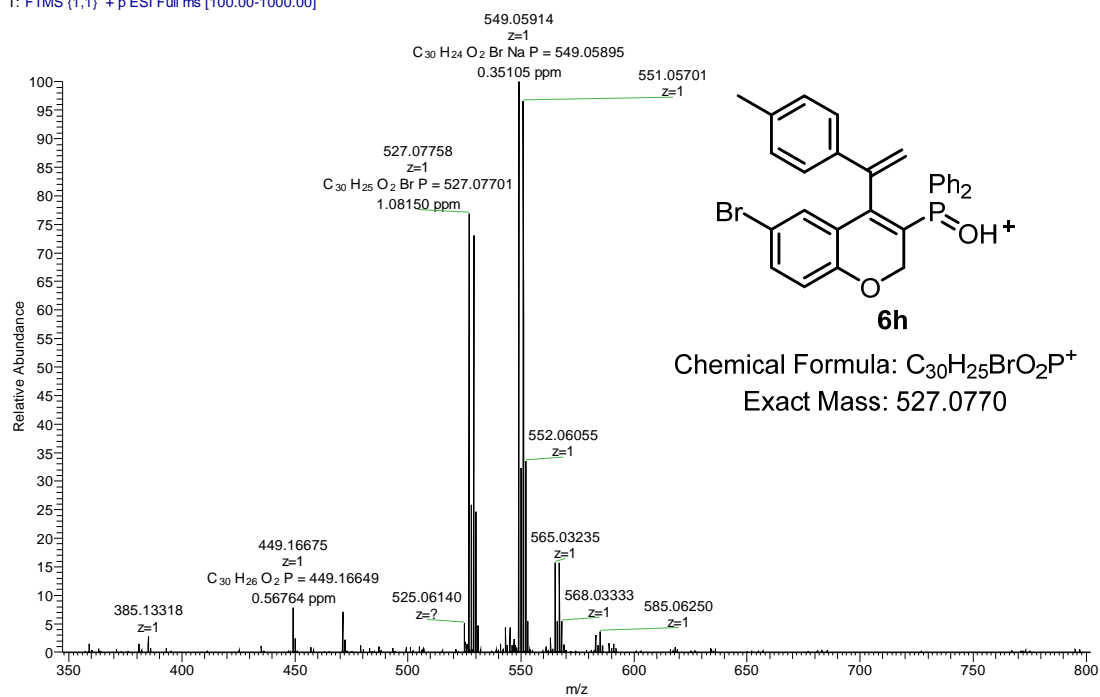

HRMS of **6h**

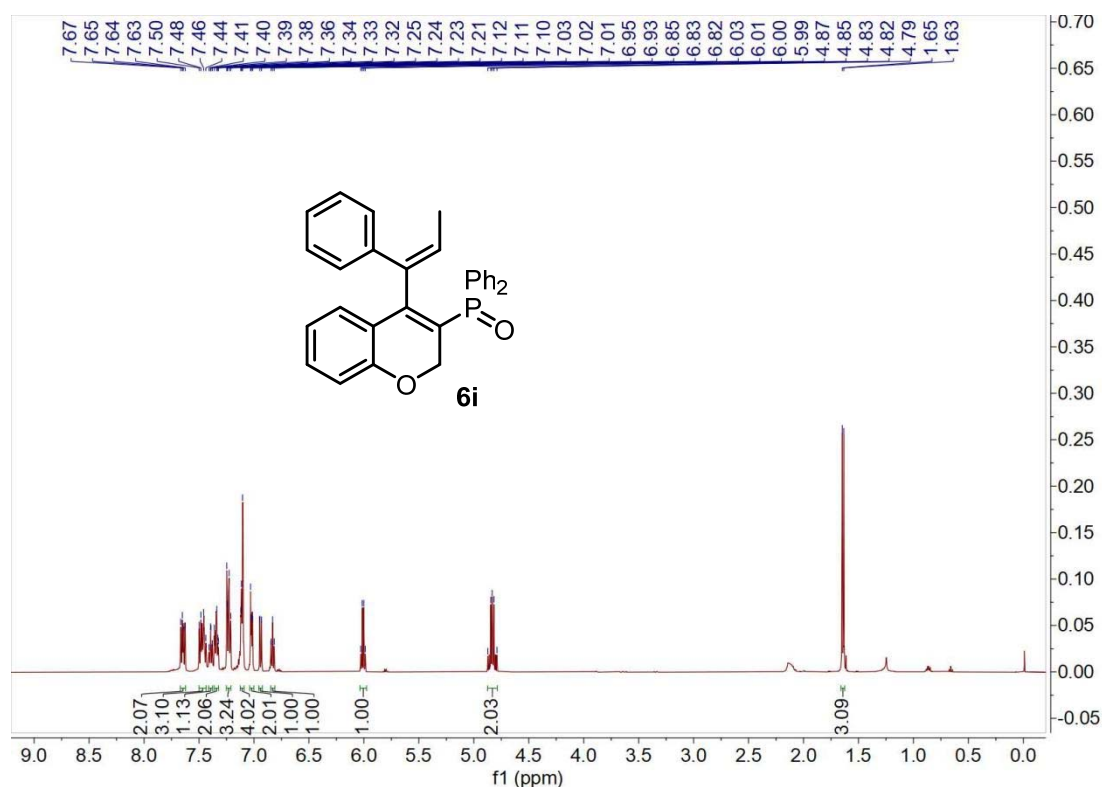

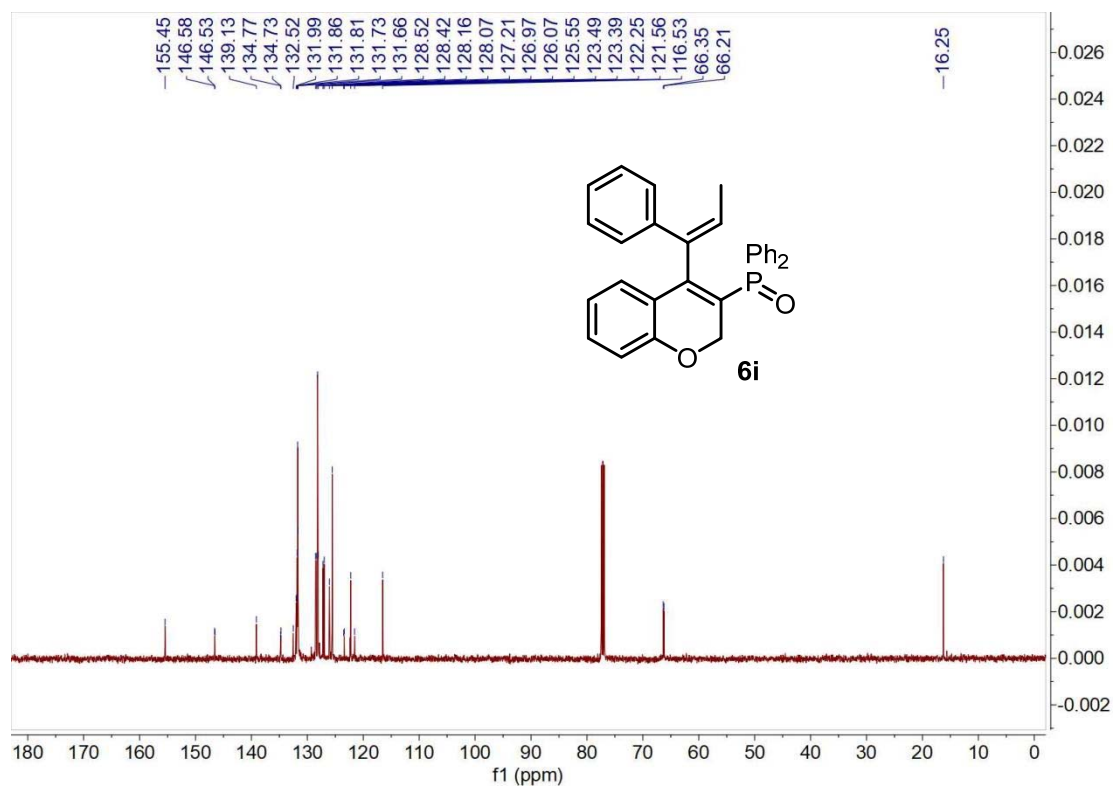

<sup>13</sup>C-NMR (126 MHz, CDCl<sub>3</sub>) of **6i**

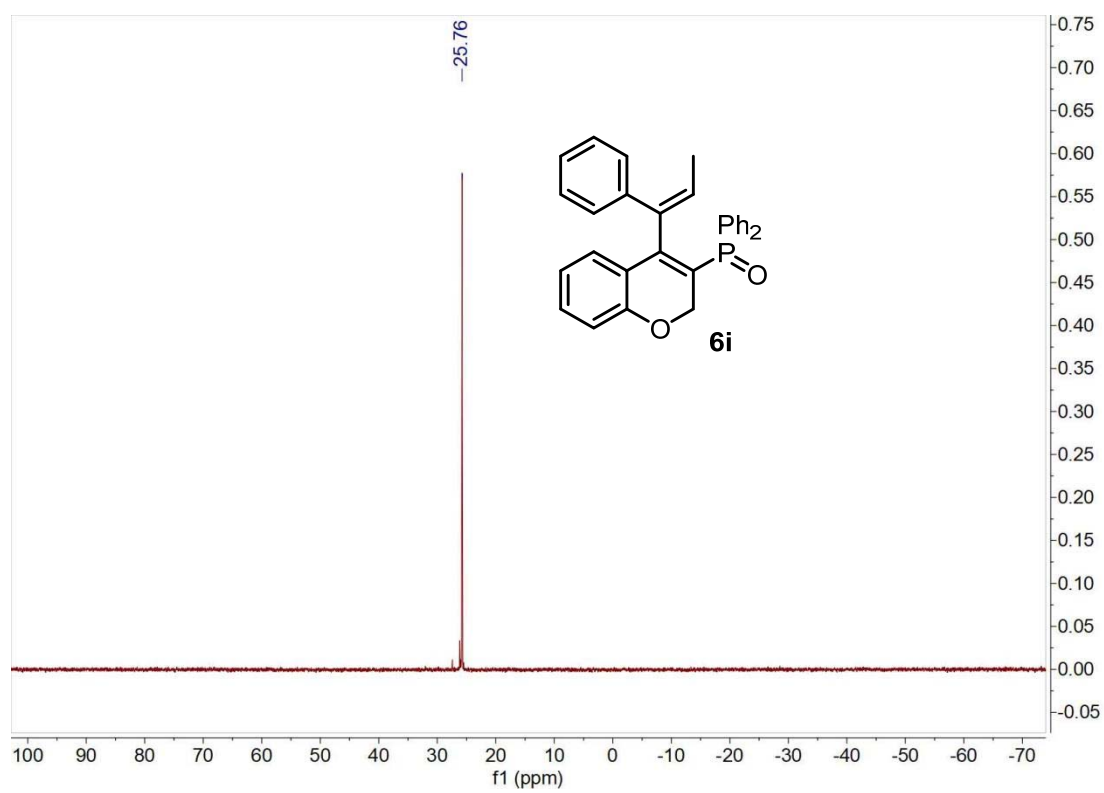

<sup>31</sup>P-NMR (202 MHz, CDCl<sub>3</sub>) of **6i**



33 #21 RT: 0.25 AV: 1 NL: 1.44E6  
T: FTMS (1,1) +p ESI Full ms [100.00-1000.00]

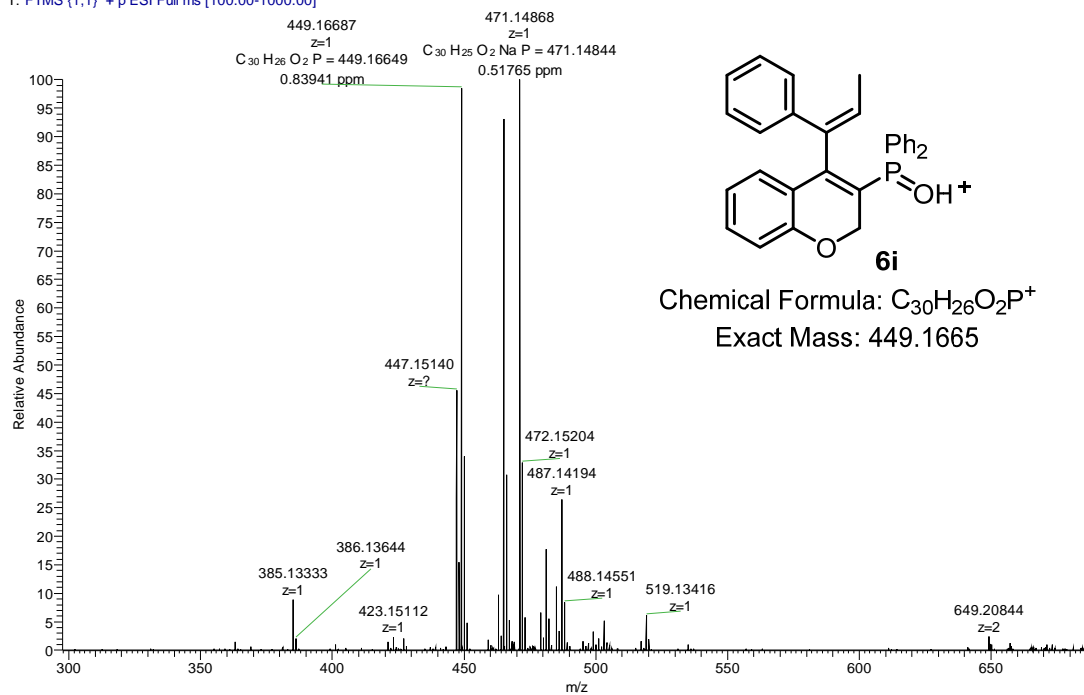

HRMS of **6i**

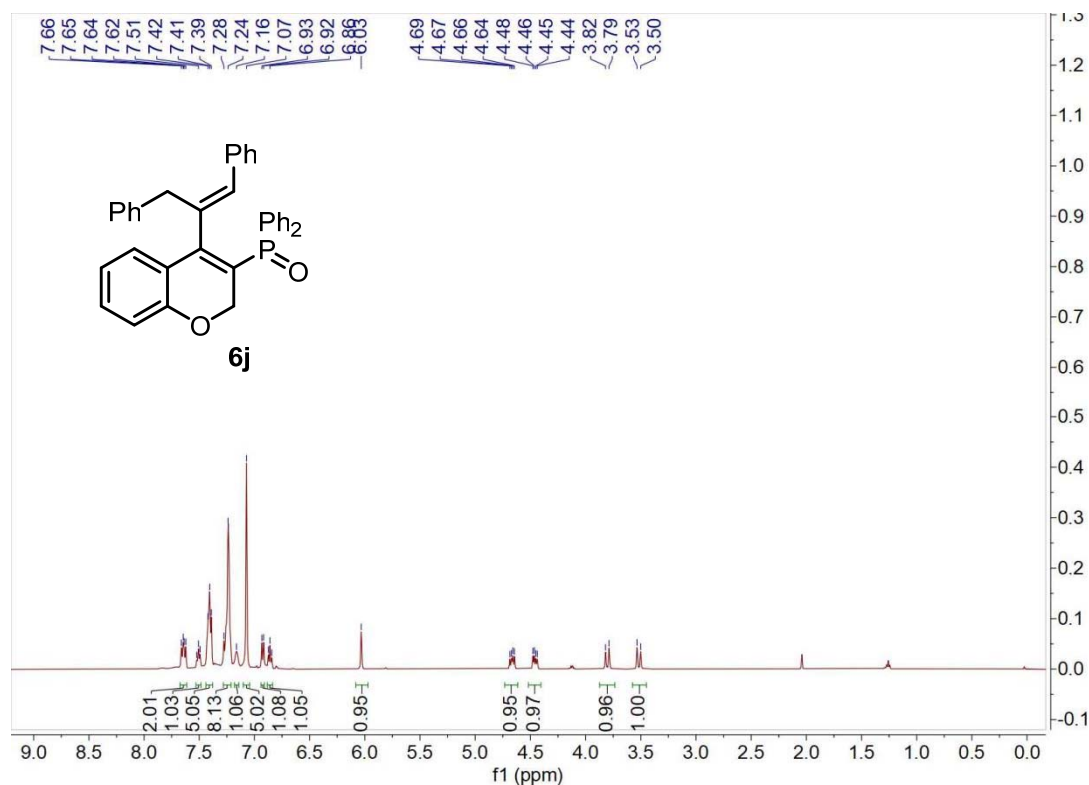

<sup>1</sup>H-NMR (500 MHz, CDCl<sub>3</sub>) of **6j**

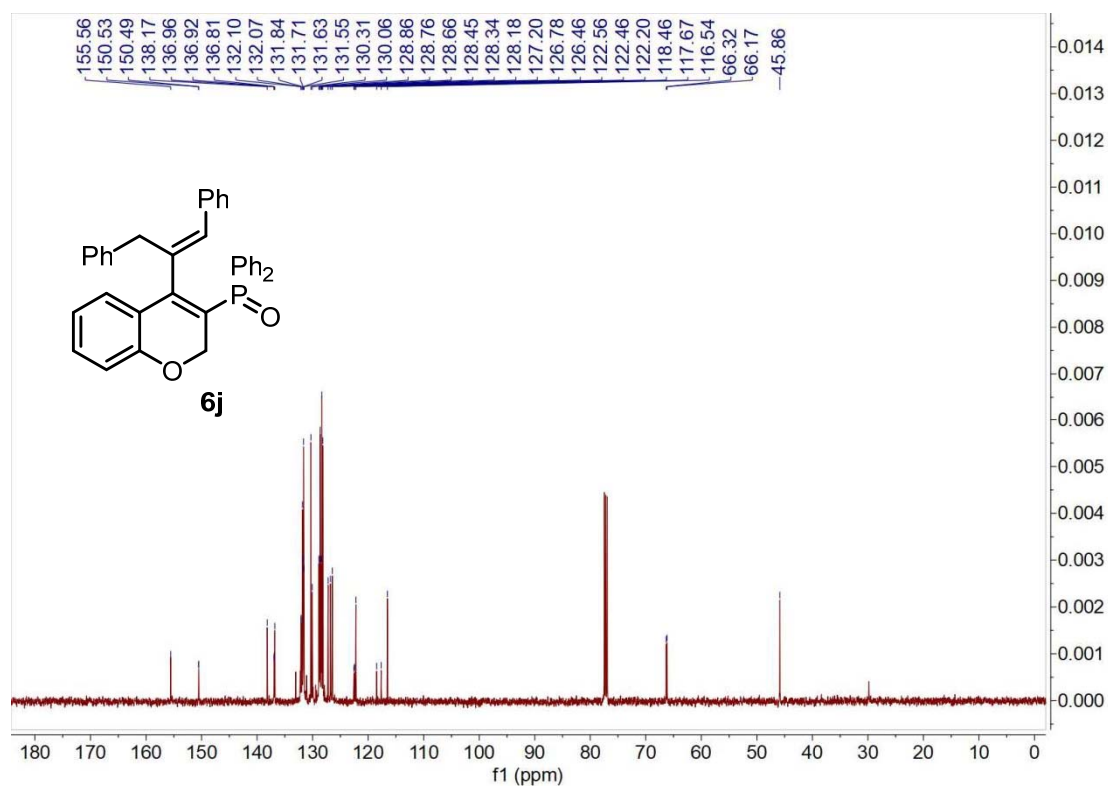

$^{13}\text{C}$ -NMR (126 MHz,  $\text{CDCl}_3$ ) of **6j**

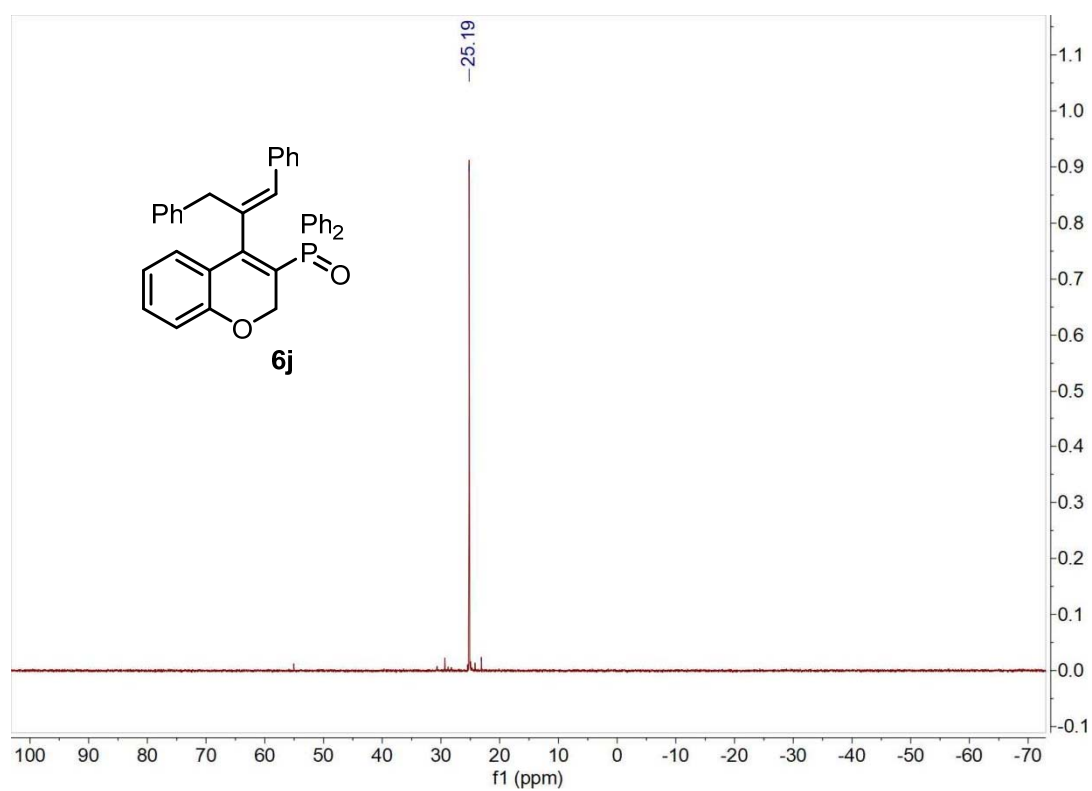

$^{31}\text{P}$ -NMR (202 MHz,  $\text{CDCl}_3$ ) of **6j**

Spectrum from 08.wiff (sample 1) - Sample014, Experiment 1, +TOF MS (80 - 1000) from 1.101 min

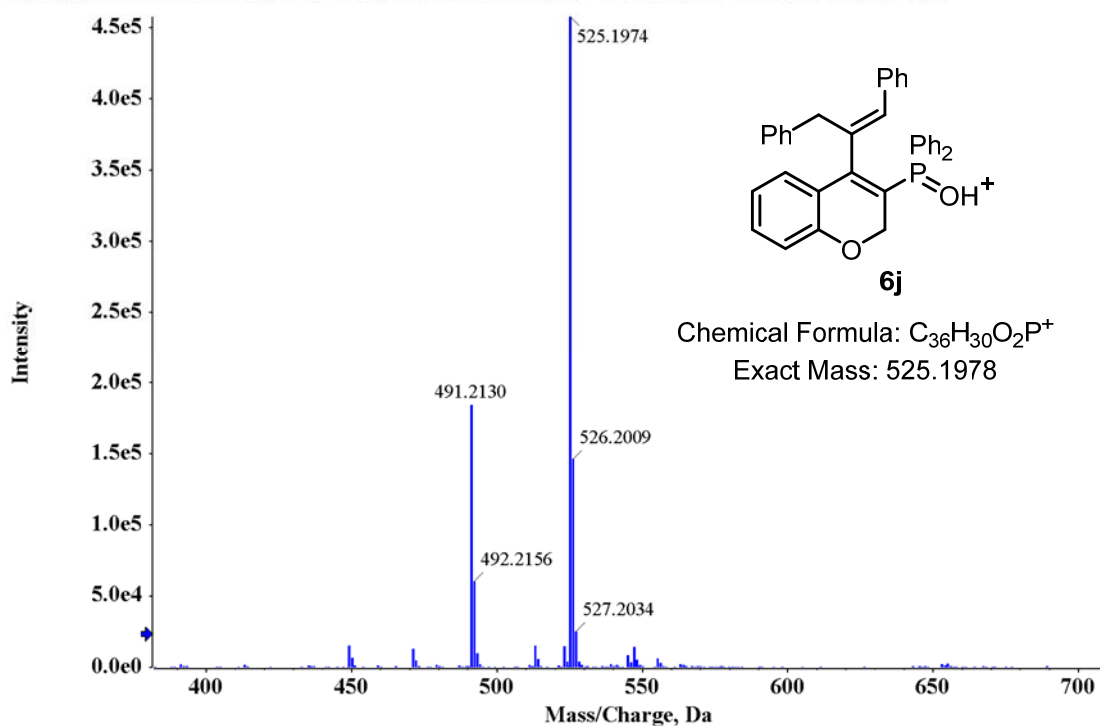

HRMS of **6j**

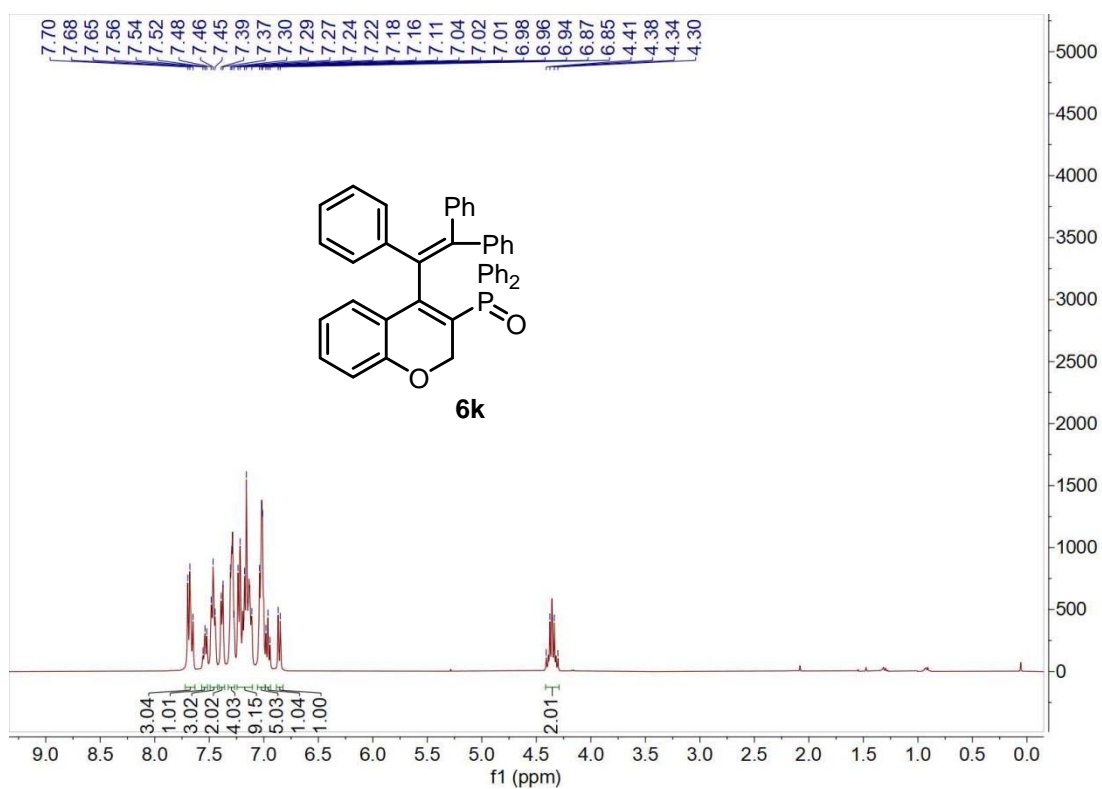

<sup>1</sup>H-NMR (400 MHz, CDCl<sub>3</sub>) of **6k**

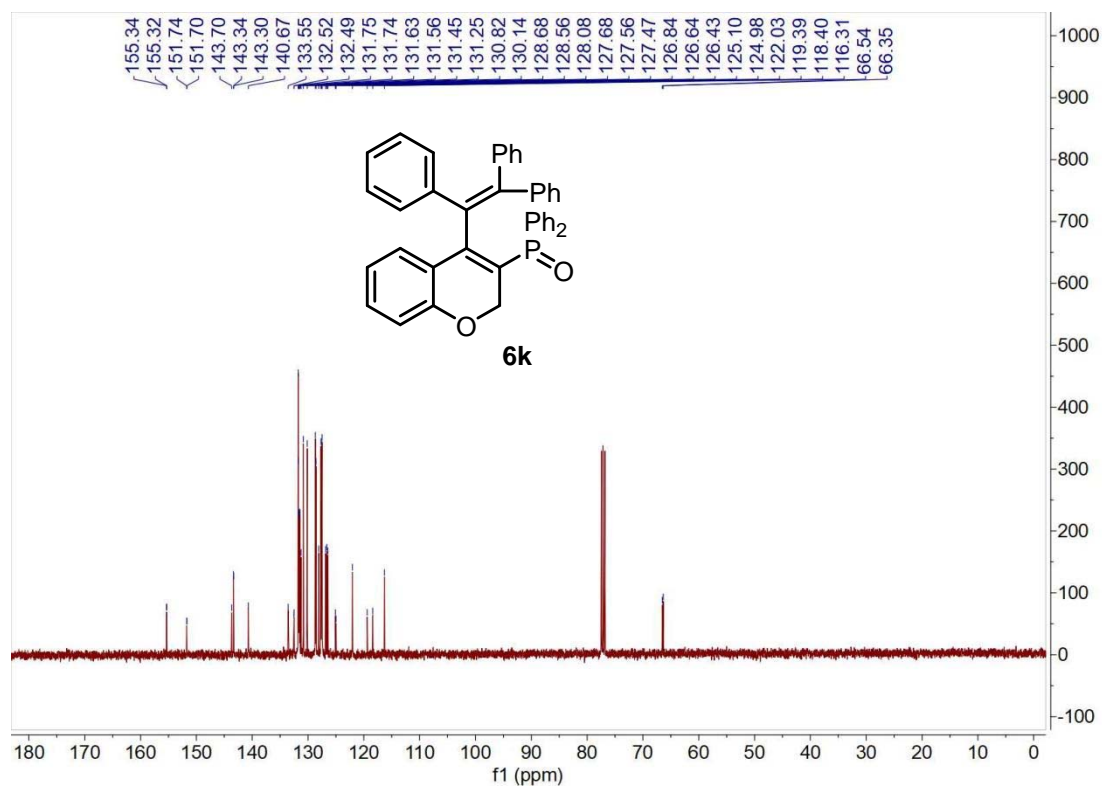

$^{13}\text{C}$ -NMR (101 MHz,  $\text{CDCl}_3$ ) of **6k**

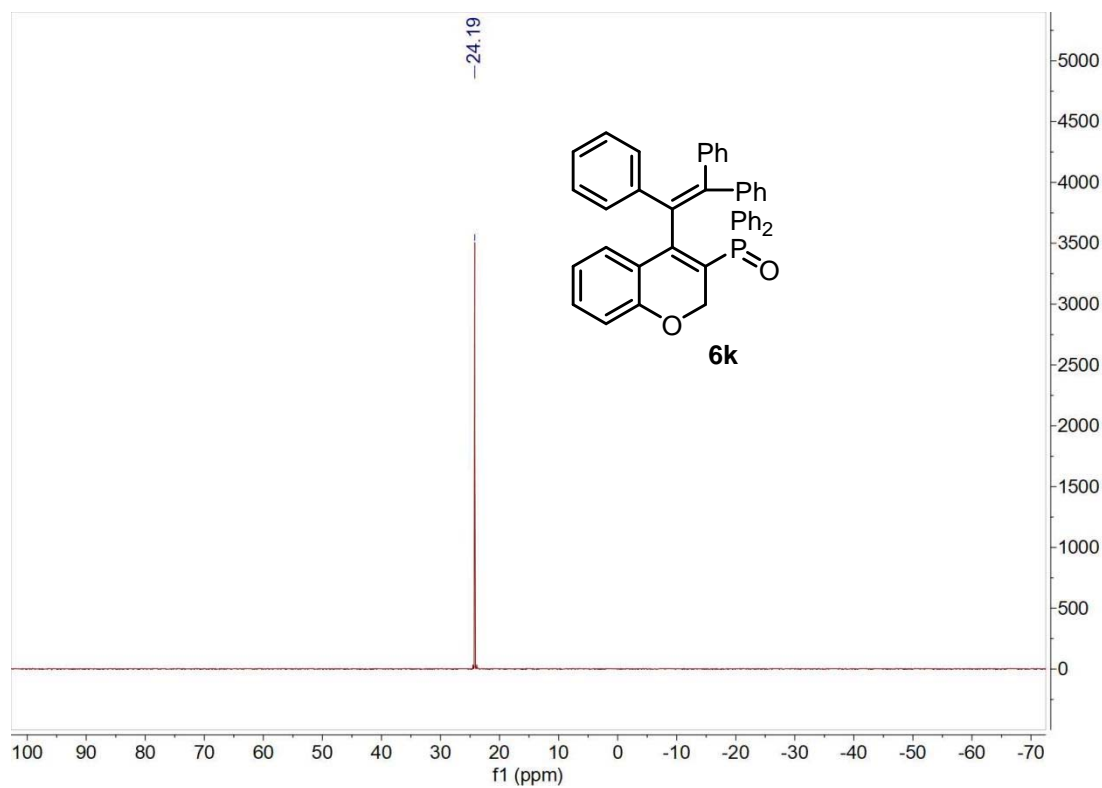

$^{31}\text{P}$ -NMR (162 MHz,  $\text{CDCl}_3$ ) of **6k**

Spectrum from 1.wiff (sample 1) - Sample001, +TOF MS (100 - 1000) from 0.219 min

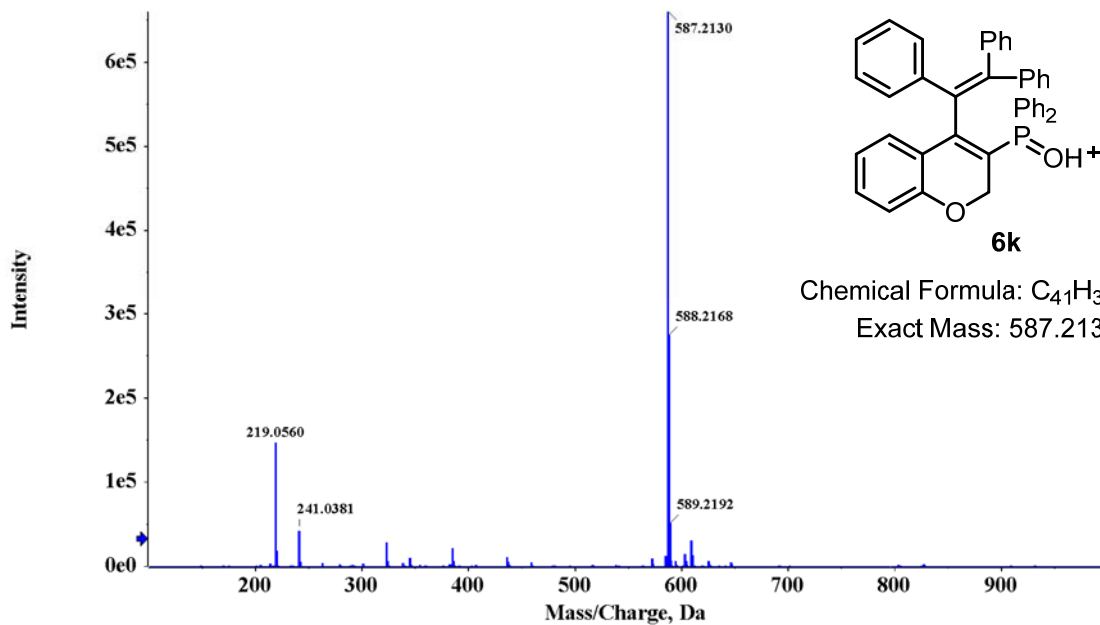

HRMS of **6k**

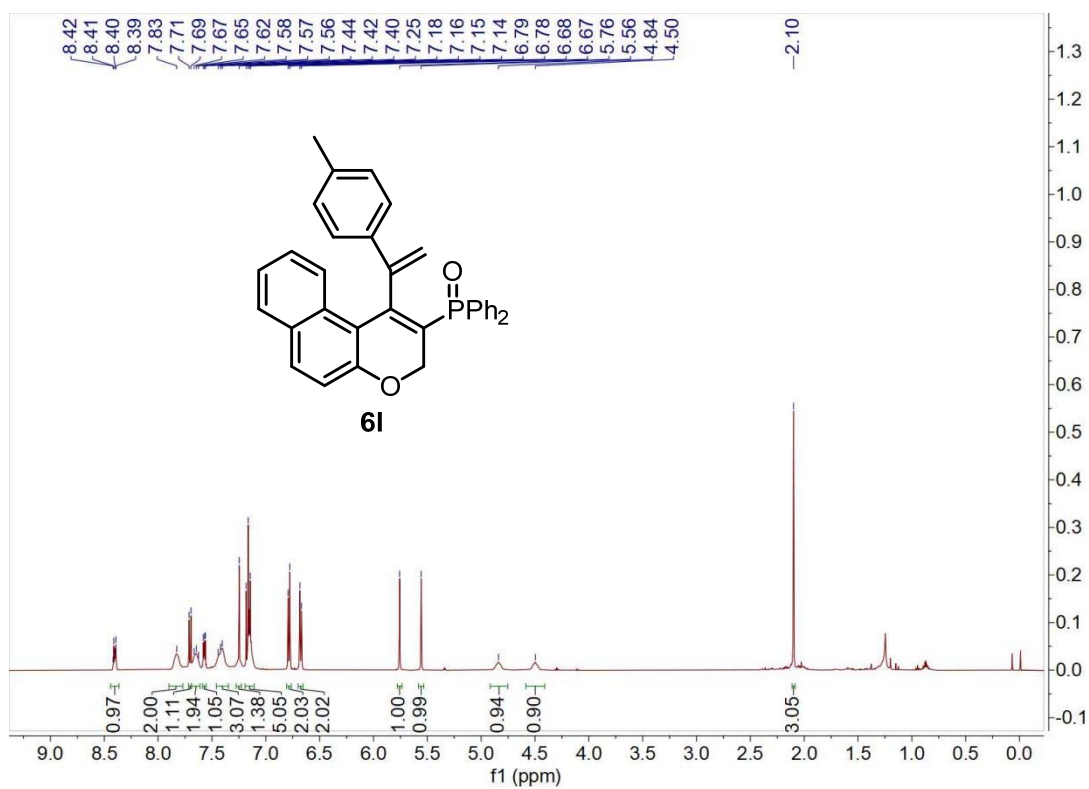

$^1H$ -NMR (500 MHz,  $CDCl_3$ ) of **6l**

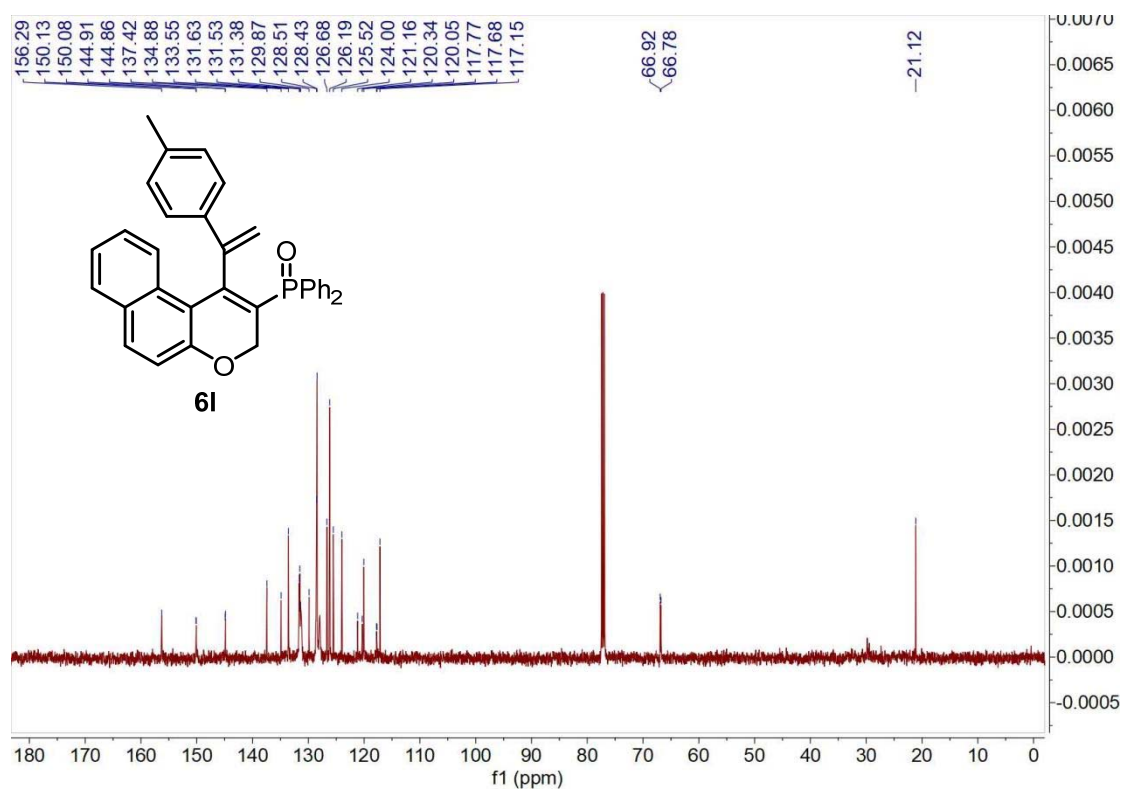

$^{13}\text{C}$ -NMR (126 MHz,  $\text{CDCl}_3$ ) of **6l**

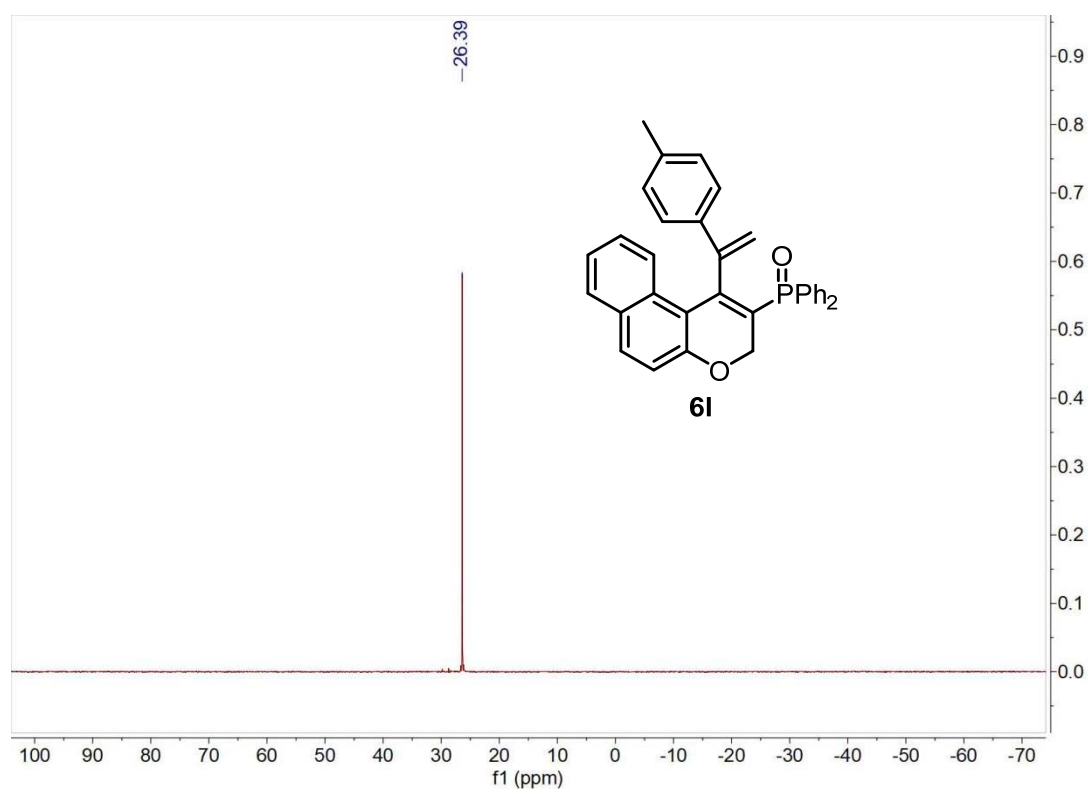

$^{31}\text{P}$ -NMR (202 MHz,  $\text{CDCl}_3$ ) of **6l**

Spectrum from 08.wiff (sample 1) - Sample014, Experiment 1, +TOF MS (80 - 1000) from 0.457 to 0.501 min

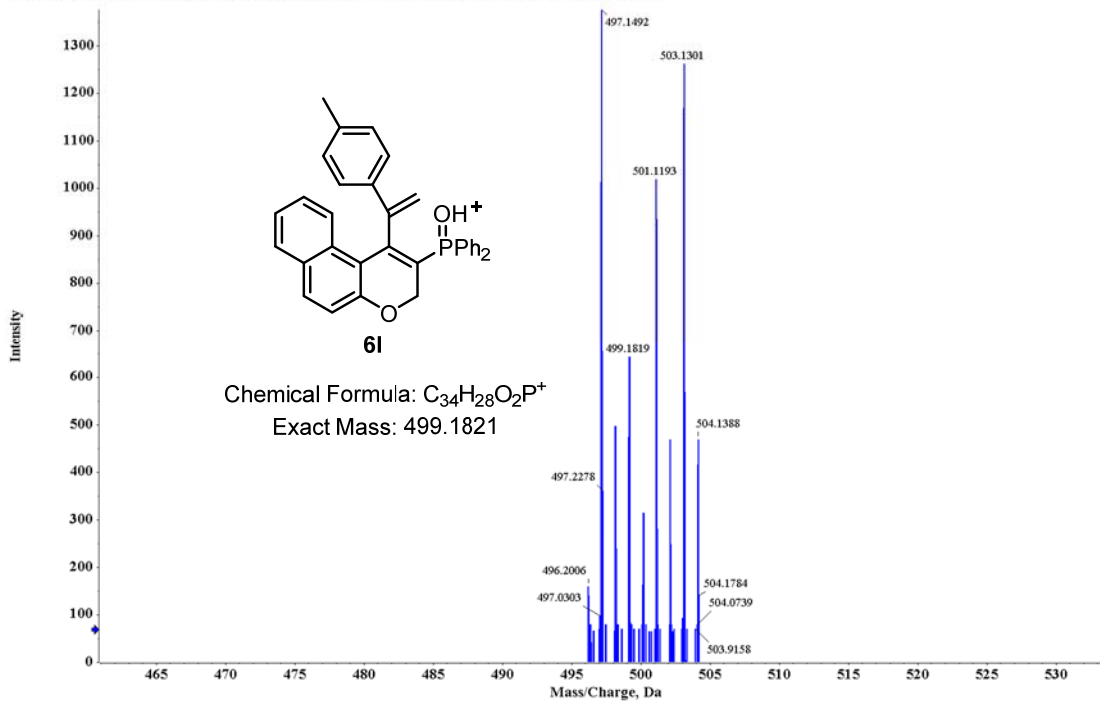

HRMS of **61**

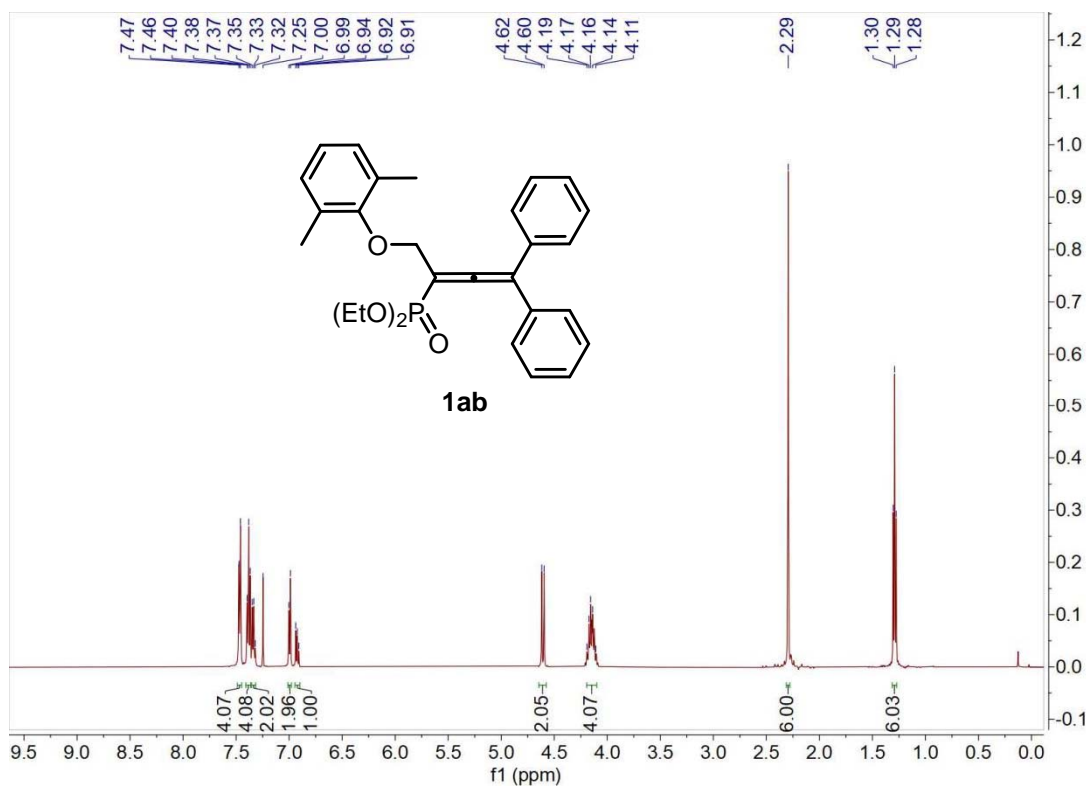

$^1H$ -NMR (500 MHz,  $CDCl_3$ ) of **1ab**

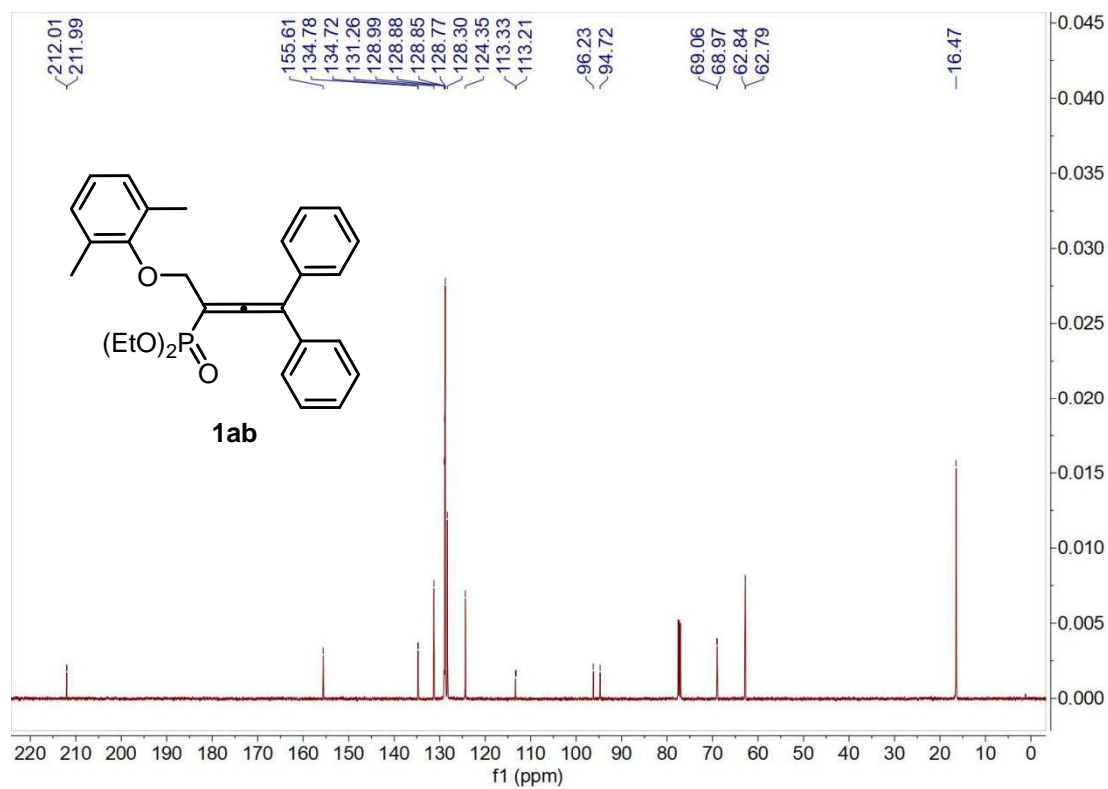

$^{13}\text{C}$ -NMR (126 MHz,  $\text{CDCl}_3$ ) of **1ab**

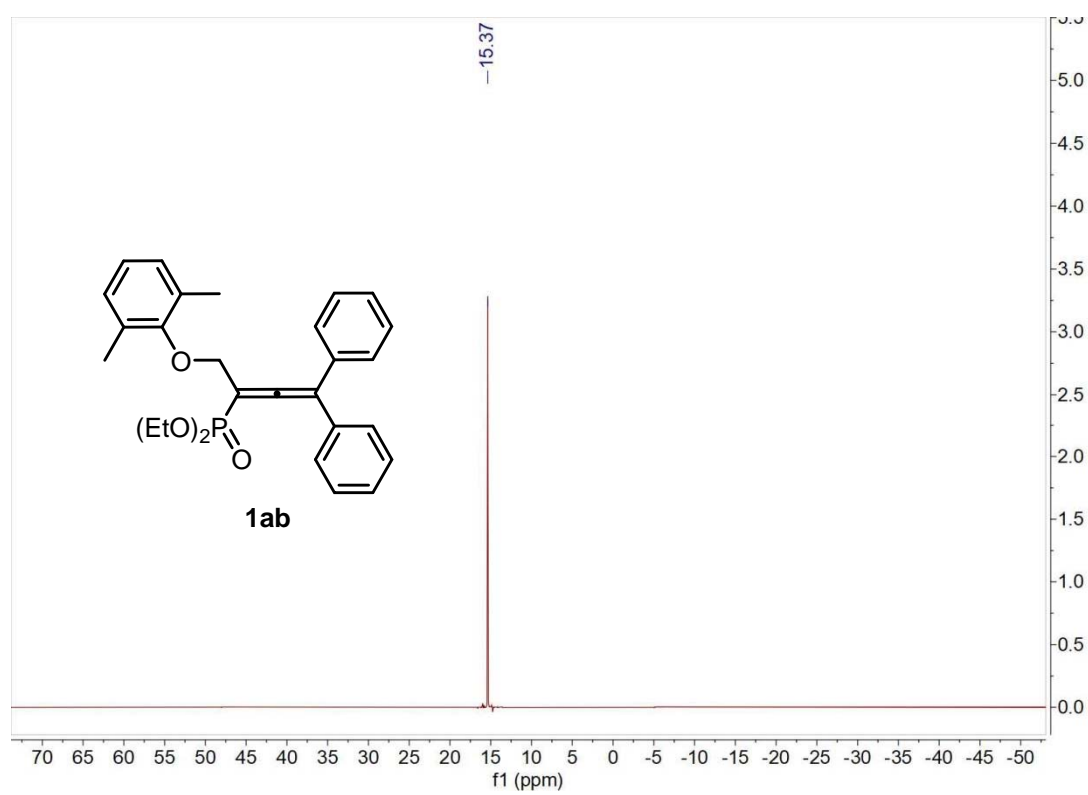

$^{31}\text{P}$ -NMR (202 MHz,  $\text{CDCl}_3$ ) of **1ab**



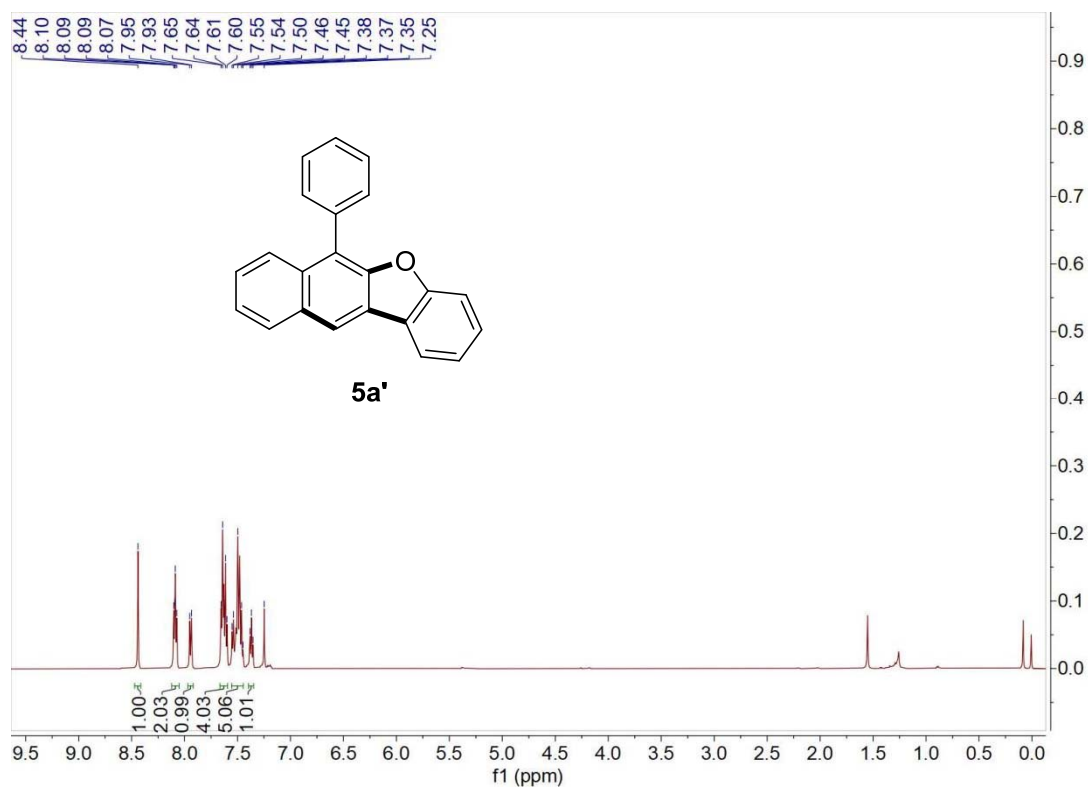

$^1\text{H-NMR}$  (500 MHz,  $\text{CDCl}_3$ ) of **5a'**
